# Supplementary material for: Loss of the Chr16p11.2 ASD candidate gene QPRT leads to aberrant neuronal differentiation in the SH-SY5Y neuronal cell model
Source: Mol Autism. 2018 Nov 6;9:56. doi: 10.1186/s13229-018-0239-z (PMC6220561; doi:10.1186/s13229-018-0239-z)
Supplement: Supplementary file 2 — Results from DESeq2 analysis and count data from RNA-Seq (MACE analysis). (XLSX 5308 kb) [file 13229_2018_239_MOESM2_ESM.xlsx]

## Sheet: diff_reg_genes
	del268T vs eCtrl		ins395A vs eCtrl		WT vs eCtrl
gene	FDR	log2FC	FDR	log2FC	FDR	log2FC
FUCA2	0.000327185	0.688416	0.0231964	0.393307	0.933998	-0.0335863
RHBDF1	0.0345739	0.567376	9.64328e-10	1.11932	0.599651	0.14466
SYT13	3.72253e-06	-0.858567	3.46899e-14	-1.39189	0.333933	-0.20491
BAK1	0.0490255	0.537878	0.000478658	0.675576	0.529795	-0.198262
MAGEC2	0.0134874	1.1475	6.2063e-11	2.0943	0.35429	-0.620025
GUCA1A	4.56027e-41	-5.38492	3.9727e-46	-5.88264	0.200057	0.263141
PHF21B	1.46251e-09	-0.732805	3.56945e-32	-1.48692	0.992757	-0.00591588
PTPRU	0.0063605	-0.450384	1.3901e-06	-0.726188	0.524644	0.0918058
SNRNP40	0.0295777	-0.433608	2.27286e-05	-0.751211	0.466542	-0.161445
TMEM206	0.00754204	-0.335673	3.45784e-09	-0.677835	0.125484	-0.20452
MTHFD2	0.0412746	-0.309794	1.32705e-09	-0.77611	0.622347	0.067221
MPPED2	7.50765e-15	-0.769242	1.49555e-142	-4.10218	0.949148	0.00171132
DAZAP1	0.00236043	-0.35849	1.18447e-11	-0.736911	0.54221	0.0598341
SPEG	0.00247355	0.43145	1.22994e-10	0.69152	0.990249	-0.0212868
PPP2R2C	1.05869e-07	-2.31458	4.62957e-14	-3.83743	0.174689	0.469218
SEMA3C	6.41403e-08	-0.595543	0.0290132	-0.300886	0.409549	0.0924662
RGS11	0.00115186	0.895204	0.00356155	0.684519	0.275222	-0.383528
PLXNA2	0.0159495	0.607569	1.80031e-13	1.31335	0.56519	-0.183945
PCM1	0.0140001	0.31934	7.79627e-06	0.414775	0.789049	-0.0484592
BRINP1	8.93378e-09	-2.92401	2.08536e-09	-2.85269	0.202043	-0.529837
SAR1A	0.000156392	-0.34046	0.0189359	-0.256162	0.939474	0.00607079
WBP11	0.00984485	-0.303976	9.56055e-07	-0.540933	0.165642	-0.175244
GNAO1	4.41498e-07	-0.587051	4.1429e-10	-0.734888	0.951037	-0.0186758
SH3BP2	0.0492955	0.462297	0.00303697	0.511331	0.356586	-0.24919
MLF2	0.0166706	-0.160561	0.00601053	-0.216927	0.97134	-0.0176474
POLR2E	0.0076154	-0.239583	8.02454e-05	-0.371775	0.241038	-0.121204
CNIH1	1.67874e-05	-0.334209	0.0115909	-0.247936	0.613317	-0.0623005
ITPK1	7.61473e-06	0.580251	7.50066e-19	0.930756	0.835674	0.0264069
EFS	0.0297288	-1.0253	6.00336e-08	-2.44524	0.57218	0.230966
RIMS4	0.00811211	-0.538835	0.00547923	-0.550451	0.671739	-0.103946
CCM2L	0.0086307	-1.10962	0.0166821	-0.926362	0.607568	0.211857
CELF4	0.00521772	-0.832826	1.01859e-20	-2.9911	0.290727	-0.314171
USP11	0.0259652	0.21446	4.73324e-05	0.261152	0.340695	0.0732805
CBLN1	0.0273264	-0.671161	1.58139e-08	-1.45091	0.70268	-0.137795
CHRAC1	0.0112953	0.630884	0.0384062	0.422713	0.252534	0.266476
RNASEH2A	0.04865	-0.263369	3.99289e-07	-0.583465	0.538355	0.0652018
AMH	0.0313122	0.381885	0.000230211	0.462035	0.960264	-0.0321484
OAZ1	0.00880522	-0.191123	2.91415e-05	-0.320502	0.877357	-0.0227283
SLC1A5	0.000592805	-0.36742	8.26888e-16	-0.813872	0.118469	0.157097
TGFB1	0.0342041	0.315177	4.52826e-18	0.844469	0.412021	0.104283
PLEKHA4	0.00185884	0.830146	1.23439e-07	1.11874	0.986654	-0.0241404
RAB3A	1.63401e-05	-0.912035	2.61544e-06	-0.96415	0.246732	-0.274938
CDK6	2.4489e-07	0.44708	6.69692e-07	0.352203	0.104254	-0.174807
CHCHD2	0.00410786	-0.205825	1.9556e-11	-0.467247	0.131222	-0.121762
NUDT1	0.00118477	-0.334366	3.07789e-17	-0.822724	0.836503	0.0113891
CLDN15	0.0455962	0.40356	0.00814669	0.393228	0.35163	-0.221698
UNC5B	0.0151943	-0.238554	0.000979093	-0.329136	0.133794	0.128259
CCSER2	0.0117231	0.567116	0.00137973	0.5991	0.353609	-0.247936
GALNT18	0.0106932	-0.891865	0.000373141	-1.16764	0.959466	0.0143714
PTGES3	0.0442023	-0.158142	1.29717e-19	-0.606117	0.339188	0.0659304
CUX2	3.13318e-08	-2.39989	2.49617e-09	-2.4741	0.189415	-0.53091
OAS3	0.00411636	2.09731	0.0015641	2.03881	0.656858	0.496054
COX6A1	0.0262763	-0.145344	1.77835e-10	-0.393817	0.749046	-0.0398821
C6orf62	0.0497551	-0.753316	0.000446214	-1.1829	0.130624	-0.501349
VEGFA	0.000776391	0.52608	6.39757e-06	0.562404	0.286661	-0.203989
SLC29A1	0.00281168	0.366532	0.0358705	0.201909	0.902192	0.00968509
C7	1.72117e-87	-0.92774	0.0128471	-0.179783	0.314647	0.0472048
PDGFRB	0.0214461	0.32112	0.00637894	0.270706	0.876906	-0.0428836
STC2	1.57186e-05	-1.03989	1.49828e-05	-1.01683	0.968755	-0.00670699
ARL6	0.0134503	-0.492911	2.82875e-05	-0.768705	0.638591	-0.111721
PCCB	0.000934294	0.365861	0.00792666	0.24212	0.932491	-0.000993324
C3orf14	0.000594019	-0.459063	3.20792e-05	-0.563718	0.174866	-0.205408
PODXL2	1.58958e-05	-0.393246	0.0128294	-0.282817	0.463714	0.0673087
GLS	0.0224893	-0.306203	0.0197039	-0.334159	0.998355	-0.00592711
UNC50	0.0471551	0.30936	0.0120253	0.271031	0.24642	-0.189361
IGFBP2	4.51633e-36	-0.608503	0	-2.13459	0.110596	-0.10631
FHL2	0.00122355	-0.468706	4.71664e-09	-0.800579	0.991209	-0.0126967
UCHL5	0.00486828	-0.335663	1.36642e-06	-0.552058	0.446707	-0.108506
ADGRL2	0.00238637	0.341382	0.00455239	0.24314	0.657207	0.0445187
RPA2	0.0026628	-0.384684	0.00152706	-0.416139	0.89217	-0.0285821
UCHL3	0.0226312	-0.420169	5.72272e-06	-0.759492	0.356863	-0.17941
DLST	0.021291	-1.27982	0.00860644	-1.34522	0.527496	-0.318031
IQSEC3	0.00361782	-1.63972	0.00842768	-1.38049	0.294958	-0.551395
NPPB	0.000204442	2.31464	5.28984e-05	2.25797	0.742071	0.358793
CRISPLD1	0.0227716	-0.366236	4.92276e-09	-0.830476	0.990111	-0.00514391
RNF2	0.0328258	-0.446209	0.00303697	-0.573939	0.646273	-0.104157
TMEM54	0.00203129	0.313468	0.00181884	0.225341	0.362352	0.0832511
NDUFAF4	0.00315091	-0.399465	8.53093e-08	-0.682928	0.861262	-0.0412607
MORF4L2	1.01057e-06	-0.320597	1.37389e-11	-0.469246	0.806834	0.0175646
MAGEA10	1.96615e-06	1.47073	2.94926e-66	3.83932	0.726481	-0.228075
TNFSF9	0.000615591	-1.76005	0.000128562	-1.82495	0.181312	0.526184
LAMP5	2.30653e-26	-1.09253	6.15945e-68	-1.96623	0.565643	-0.083134
TCF15	0.0330042	-0.703842	7.66146e-06	-1.31319	0.689904	-0.147915
TUBA4A	0.000408453	-0.734483	0.00272362	-0.633987	0.108809	-0.343598
RASL11B	0.00130306	-0.472225	4.20654e-28	-1.58203	0.545842	0.0903418
PDE11A	1.37472e-21	-0.994083	1.08011e-11	-0.737175	0.514528	-0.0962628
HOXD11	2.71972e-06	-1.12479	9.49726e-18	-2.15451	0.407262	-0.234664
KCNC1	0.0455962	-0.620097	0.042784	-0.590567	0.268075	0.284938
KIAA1683	0.00121369	0.912537	8.32465e-05	0.942329	0.235183	0.349401
OLFM1	0.00701003	-0.353059	2.89725e-27	-1.27153	0.668569	0.0546779
SLC35D2	0.00133015	0.524691	0.000825049	0.446441	0.778893	-0.081381
PPT1	0.0325607	0.366359	0.00159377	0.400022	0.274993	0.17057
ACLY	1.83012e-29	0.61388	4.38722e-20	0.44983	0.199122	-0.102269
RTBDN	0.0176806	-0.451279	0.0394987	-0.410773	0.160912	0.217534
MATN3	0.000520117	0.741137	3.14282e-06	0.817587	0.190796	-0.348277
TRIM47	0.001375	0.763206	0.03109	0.482076	0.244971	0.290108
WASF3	0.00699021	-0.636749	1.02671e-14	-1.75349	0.205398	0.269067
NTS	0.00143861	-1.40235	2.47389e-08	-2.41465	0.426604	0.294082
ARNTL	0.0351095	-0.631181	0.0278644	-0.629048	0.393298	-0.249134
SARAF	0.00432539	-0.193107	0.00172713	-0.249108	0.422556	0.0547252
VAV3	0.031251	-0.939699	9.00229e-08	-2.16308	0.124145	-0.592095
SLC38A2	0.000472779	0.32181	0.0163385	0.167811	0.334787	-0.114411
LPIN1	9.24964e-40	1.33919	0.0154934	0.255108	0.746532	-0.0725907
PRPH	1.86773e-08	2.05256	2.11678e-23	3.01781	0.612273	-0.419332
KCNMB4	0.0421967	-0.342707	1.18079e-12	-1.01278	0.63334	-0.0942156
RAPGEF5	8.94922e-05	0.530653	1.72951e-08	0.618145	0.348407	-0.169843
HINT2	0.000801297	0.322166	0.0111098	0.177488	0.652555	-0.0667425
DCUN1D5	0.000114619	-0.392886	4.03434e-18	-0.85105	0.645476	0.0478757
RDX	0.00494034	-0.353645	0.00593727	-0.358854	0.282934	0.120138
ARHGAP20	1.63257e-09	-2.65261	4.08434e-15	-3.92675	0.453082	-0.298208
LOXL4	0.0337763	1.21377	0.0323502	1.04804	0.455946	0.449168
COX17	3.32761e-138	-5.93769	1.78055e-154	-5.62798	0.303879	-0.126469
DUSP6	2.05987e-07	-0.412166	2.09742e-121	-1.97327	0.977447	-0.000203376
SNRPF	0.00316159	-0.265286	1.33747e-11	-0.57756	0.905487	-0.0349111
SRRM4	1.29425e-18	-2.61234	2.25379e-26	-3.39742	0.539059	-0.20493
RAB20	0.00205718	-0.741649	0.00296548	-0.702646	0.972763	-0.0313972
PGGHG	0.0400198	0.496223	0.00427415	0.533867	0.369923	0.201758
APP	5.71248e-10	-0.416432	5.36661e-06	-0.359081	0.516922	-0.0685579
LMO4	2.05534e-09	-1.14195	2.18981e-23	-1.98646	0.261413	-0.248726
PSMA5	0.0391579	-0.23513	0.0110332	-0.292682	0.564413	0.0533285
ATP1B1	0.00108248	-0.551762	0.00181029	-0.526294	0.405696	-0.16066
NME7	2.31765e-06	-0.360621	7.58796e-12	-0.534373	0.734226	-0.0436452
MARCH4	7.78588e-08	-0.933577	8.83907e-31	-2.22256	0.228653	-0.236602
TMEM44	0.0122829	0.622203	0.0274386	0.454622	0.51823	0.159704
STXBP5L	5.01872e-05	-2.09089	4.64616e-08	-2.86782	0.284288	-0.498589
ECE2	0.00253415	-0.741649	0.0425108	-0.525492	0.470676	0.154526
ATP10D	0.0365954	0.419146	0.0246169	0.349844	0.166009	-0.293513
SSC4D	0.0065247	1.0422	7.47618e-06	1.3263	0.286486	0.418008
CCT6A	0.00420693	-0.187063	0.00693784	-0.212864	0.103449	0.092753
ATP6V1B2	0.026614	-0.258349	2.55468e-05	-0.457254	0.702246	-0.062197
VLDLR	0.000732973	0.579946	1.49042e-16	1.08744	0.60062	-0.124816
EEF1AKMT1	9.46343e-10	-2.50581	0.0117294	-0.914161	0.9637	0.0112766
CFC1B	0.00133229	-2.48529	0.000309817	-2.56798	0.354088	-0.583255
MGAT5	0.00816614	-0.340392	0.00994385	-0.353447	0.822155	-0.0470767
PDE3B	0.0269932	-0.627501	0.00374306	-0.760381	0.191724	-0.359401
NRSN1	0.0153439	-0.531867	3.99259e-07	-0.9929	0.112658	0.281918
JAKMIP1	4.66909e-13	-1.57861	1.65336e-34	-3.32804	0.801631	0.0626002
PID1	6.81089e-06	-3.98197	0.00287416	-1.93134	0.285896	-0.682616
AK5	0.000239576	0.56363	1.89979e-13	0.878092	0.343836	0.155528
PTPRN2	5.85402e-07	-0.694663	1.11578e-09	-0.836682	0.906365	-0.0366784
ALX3	0.000113006	1.22096	2.56115e-08	1.47185	0.3537	0.356294
PTDSS1	0.000695301	-0.392967	0.0425615	-0.281035	0.214765	-0.161477
HK1	0.00964677	-0.291802	6.21892e-07	-0.524062	0.33212	-0.121636
B3GNT7	0.00678158	1.20213	6.172e-17	2.51729	0.144666	0.659876
NMNAT2	2.09934e-07	-0.704917	6.69754e-28	-1.50715	0.507373	0.0922445
TSPAN18	0.00424811	0.31418	9.03635e-17	0.63883	0.658406	0.0439859
GALNT14	5.02617e-06	-2.14516	3.69602e-12	-3.74222	0.40227	-0.365038
DMTN	0.00439967	0.981607	0.0109992	0.776624	0.524644	-0.31159
CACHD1	0.0373767	-0.52218	1.75557e-06	-1.03151	0.500335	0.153023
CCDC24	0.0481849	0.65546	0.00828942	0.644035	0.5096	0.203775
TPPP3	4.46514e-07	0.751429	2.43303e-05	0.558013	0.53215	-0.152626
RALGDS	0.000239576	0.395814	0.0462618	0.179485	0.38232	-0.121432
FAM189B	0.000360266	0.353063	0.000597931	0.26429	0.393457	-0.113819
SHANK1	0.0367443	-1.37482	0.0313616	-1.25447	0.481808	-0.410513
RACGAP1	0.0473247	-0.238348	1.68881e-14	-0.770441	0.11367	0.152655
ACOT11	0.00496397	1.14066	4.74908e-05	1.33209	0.674212	-0.277007
DHRS3	0.000587807	-0.526055	0.00367179	-0.474156	0.47843	-0.122799
EXTL2	0.0449355	-0.246345	0.0107229	-0.318185	0.121622	-0.183651
DDR2	1.60835e-05	0.454306	1.65144e-12	0.611264	0.706048	-0.0657823
CAPN2	0.0405602	0.27155	1.83642e-07	0.465037	0.274012	-0.157186
STT3B	0.00461601	-0.355233	7.4665e-11	-0.744376	0.137485	0.174549
PRKCI	0.0358978	-0.442264	0.0366272	-0.44591	0.105031	0.287807
WDR43	0.00307065	-0.548802	0.00077563	-0.597509	0.568365	-0.11474
CAMK2N2	1.94709e-26	-1.14903	1.44425e-12	-0.774668	0.409197	-0.122852
CAMKV	0.000107607	-0.769355	1.66158e-07	-1.00033	0.225947	-0.259728
MAD2L1	0.00267104	-0.366605	5.64663e-23	-1.09824	0.292676	-0.148994
SEPT8	0.0306668	0.449134	0.0418959	0.3323	0.924685	0.00417109
STK17A	0.00473701	-0.438472	0.0457552	-0.348295	0.925574	-0.0255276
RASEF	0.000376145	-1.84729	2.07987e-10	-4.05147	0.509586	-0.326737
SLC7A3	0.0171828	-1.34275	2.02727e-07	-3.14082	0.264433	-0.570789
SLC18A2	9.19308e-07	0.839773	0.0322776	0.36604	0.200254	-0.290623
FAM35BP	0.0432602	-1.03015	0.0457223	-0.923694	0.597493	0.240855
SVOP	0.00194375	-0.802621	4.51968e-09	-1.40602	0.484874	-0.201694
GABRB3	3.03893e-43	-3.00204	9.42767e-54	-3.57569	0.802556	0.0446072
TUB	0.00130306	-0.50456	0.00156626	-0.503413	0.66226	0.0725722
CACNG2	1.93301e-05	-2.32918	1.57447e-09	-3.60683	0.331219	-0.488324
ATP5L	0.0407197	-0.141368	2.12712e-07	-0.348785	0.93076	-0.00786344
CTNNB1	0.000250348	-0.905052	5.41171e-08	-1.26335	0.124818	-0.374446
GNG4	1.64129e-08	-0.433349	4.99074e-54	-1.21468	0.1589	0.108122
TMEM129	0.0105807	0.352256	0.000271893	0.365979	0.728569	0.0409651
SDC2	6.62255e-07	-0.659914	0.00147992	-0.477327	0.545893	0.0891444
HEXDC	0.0371498	0.505609	7.4777e-05	0.679679	0.3141	0.220857
RFNG	0.0494766	0.273816	3.62858e-08	0.49399	0.794366	0.0171015
VSTM2A	1.81074e-10	-5.00375	6.35912e-12	-5.28291	0.607055	-0.26829
HSPA4	0.0118259	-0.247775	0.0412169	-0.240542	0.552527	-0.0732738
LSM3	0.00187072	-0.278966	1.01693e-10	-0.57326	0.597493	-0.0716278
KCNK3	0.0467125	-0.383708	4.14039e-06	-0.7504	0.556131	-0.135542
BPTF	0.049429	0.448856	0.0156532	0.411849	0.155557	0.270909
SNTG2	0.000703558	-2.70832	5.06111e-07	-5.58428	0.715219	0.224246
PPP1R3B	6.82905e-08	-0.839663	4.76038e-06	-0.719108	0.48221	0.108012
DAB1	0.0464072	-1.90101	0.00311818	-2.66502	0.953784	0.0602046
CHD2	0.0473247	0.408724	0.012285	0.381168	0.225125	0.215759
AP000769.1	9.59787e-05	-0.849547	9.50709e-38	-3.46199	0.67347	-0.134354
GPR160	0.000108369	-1.41175	4.1429e-10	-2.27242	0.474634	-0.286688
UBXN2A	0.0357048	0.298889	0.00462906	0.273691	0.893628	-0.0361755
CTSF	9.57391e-12	-0.787365	0.000212112	-0.4694	0.126208	-0.20876
CNTNAP2	3.84621e-05	-0.971471	9.0338e-07	-1.1183	0.818988	-0.0886126
LINGO2	0.0196837	0.547821	0.0243563	0.424951	0.371931	-0.248361
UGT8	0.0140534	-1.44043	4.21921e-08	-3.71882	0.132712	-0.779371
TMEM167A	7.98063e-08	-0.435843	2.31381e-09	-0.517989	0.793397	-0.0386661
C4orf32	0.00383804	-1.22564	8.09522e-05	-1.53789	0.492072	-0.313714
ORAI3	0.0325164	0.294067	3.5076e-11	0.59729	0.284791	-0.155228
PLA2G16	0.0455534	0.35495	3.53086e-07	0.595269	0.186603	-0.242358
LY6H	0.0158146	-1.69188	9.57499e-07	-4.19502	0.912885	0.0845335
COX5A	0.00156688	-0.228742	0.000123854	-0.308855	0.245582	0.0699967
ERICH3	5.59045e-05	1.99214	7.1546e-22	3.4428	0.194223	-1.64582
GPC5	0.00438977	0.789018	7.20482e-05	0.871392	0.888396	0.0560533
PIPOX	0.000796833	1.10716	0.00328697	0.890785	0.930981	-0.0694811
HOXC10	0.0289596	-0.837109	1.00693e-05	-1.50609	0.406208	-0.318461
SCRIB	0.0228924	0.337005	0.000888034	0.347587	0.248125	0.150947
AEN	0.00241577	-0.500181	0.0169617	-0.417114	0.10062	-0.274548
CREB3L2	0.0497551	-0.309372	0.00909359	-0.391787	0.626355	0.0675668
NXPH4	0.0395689	-0.850664	0.0114496	-0.940266	0.566769	0.197953
PLCXD3	8.61495e-09	-0.717885	9.81654e-05	-0.529989	0.527323	-0.117619
ABAT	8.18351e-06	-0.445983	5.97097e-11	-0.656285	0.566014	0.0554295
KCNQ3	0.000576767	-4.75884	0.00124839	-3.03799	0.455713	0.491195
PTP4A3	6.37391e-06	0.848638	0.000618461	0.572835	0.805897	-0.0899443
IFNLR1	0.0116229	1.75002	0.027264	1.40707	0.801147	0.223563
RTN4RL1	0.00173772	-1.32289	0.000146381	-1.49187	0.112996	-0.624937
C1QL4	0.00582064	0.659829	2.10124e-05	0.814345	0.728901	0.0903068
ESPN	0.0110938	0.633115	2.97763e-06	0.872845	0.580821	0.123947
CCK	0.000256299	-3.18033	5.96732e-05	-3.1341	0.174526	0.675108
ZNF626	0.00986376	-0.801899	0.00171244	-0.896995	0.497988	0.21542
AGAP4	0.00432192	0.806989	2.25027e-13	1.52336	0.845823	0.0604713
SUMO2	0.00685227	-0.214044	5.62798e-10	-0.484901	0.779643	0.0202087
FAM221A	0.00310852	-0.458769	8.262e-12	-0.978015	0.417585	0.119586
SP6	0.00432539	1.96063	0.0482218	1.37851	0.122984	1.17534
PCDH18	0.0481968	-0.369916	3.41055e-08	-0.867366	0.298613	0.170404
PAX5	0.00381531	-1.47243	3.01563e-06	-2.30465	0.227848	0.467939
CPNE4	0.00015325	-1.00822	1.60741e-23	-3.17699	0.952749	0.0238888
MYO6	0.000324839	0.503386	0.00153417	0.374059	0.205259	-0.21489
S100A6	6.40142e-11	0.55754	3.43805e-52	1.09221	0.894812	-0.00192802
SMOC1	0.000139918	-0.494747	3.53061e-94	-4.08273	0.582113	-0.0925274
MT-ND4	0.0106553	0.259034	3.26041e-14	0.547056	0.359461	-0.115476
PRRC2A	0.0309244	0.226908	0.0395329	0.149788	0.354198	0.0742284
DDR1	0.0294142	0.432337	7.49221e-06	0.634611	0.452893	-0.171234
LINC01121	0.00428631	-1.14596	0.000255526	-1.33776	0.150103	-0.534963
COX17P1	1.09229e-84	-5.19289	5.81581e-93	-5.2834	0.590663	-0.111067
LINC01089	0.0297332	0.570411	0.00274061	0.588707	0.824838	0.0498322
ZNF580	0.026311	0.257631	0.000177431	0.295646	0.557165	0.0590772
C17orf67	0.0128154	1.03149	0.0450278	0.716186	0.356863	0.406746
ARHGEF28	0.00266506	1.20967	3.16344e-06	1.47796	0.357016	-0.548067
AL109918.1	0.0101494	-0.492224	6.9886e-06	-0.78348	0.982804	-0.0134896
AL591034.2	0.0250915	-0.45108	0.0204886	-0.470818	0.370542	0.147637
FADS3	0.038198	0.365468	0.00011867	0.481304	0.831842	0.0262884
CCNL2	0.000296569	0.355808	9.39583e-08	0.405492	0.396515	-0.11555
HLA-DPB1	0.0181441	-1.022	4.87881e-07	-1.99797	0.845124	-0.0892565
MIAT	0.00143256	0.738284	0.000195358	0.724971	0.65842	-0.163505
LINC01760	0.0102219	2.74327	0.00493198	2.61999	0.951161	-0.30212
XIST	0.00106122	0.628977	0.00152107	0.513039	0.533475	0.109834
RPS2P32	0.0293715	0.400022	0.00148549	0.418754	0.681478	0.0741813
C19orf81	0.0126894	-0.416302	1.7328e-08	-0.831297	0.879757	0.0105146
CDKN2AIPNL	0.0122829	-0.252019	1.85381e-06	-0.468387	0.500116	-0.0854989
PNMA2	0.0408138	-0.339173	2.66737e-14	-1.06038	0.889004	-0.0339572
ARPIN	0.0448505	0.532808	0.000289706	0.685374	0.185801	-0.372016
ETV5	0.0196837	-0.44723	5.14869e-08	-0.886186	0.128482	-0.280134
MTND4P12	1.00417e-10	0.531021	1.69219e-29	0.786513	0.262557	0.0975491
LYN	2.78336e-05	0.429157	1.1937e-10	0.533695	0.415916	-0.0957923
AL136088.1	0.0011047	-1.63884	4.49845e-12	-5.30522	0.366675	0.398337
MPV17L2	2.55864e-05	-0.446461	1.43407e-10	-0.681108	0.705815	-0.0651157
ANKHD1-EIF4EBP3	0.0424238	0.356727	0.0093024	0.345459	0.582764	0.0833741
AC025575.2	1.09899e-08	-inf	1.39329e-08	-4.83715	0.752528	-0.189408
AL160006.1	0.0245637	0.431176	0.0215423	0.32941	0.998138	-0.0209544
LINC01833	9.23783e-05	0.824019	2.05832e-14	1.28032	0.242616	-0.321603
TMEM178B	6.43402e-12	-2.45396	1.55403e-18	-3.41836	0.362867	-0.328776
AC008105.3	0.0495975	0.907456	0.000442992	1.1991	0.162391	0.588189
AC132192.2	0.0415075	1.36988	0.00421329	1.48095	0.150181	0.924105
STAG3L5P-PVRIG2P-PILRB	0.0155481	0.458192	0.00016523	0.563167	0.701892	-0.104752
AC004922.1	1.25017e-05	0.414602	8.87619e-20	0.684199	0.192844	0.122041

## Sheet: all_genes
		del268T vs eCtrl		ins395A vs eCtrl		WT vs eCtrl
gene	description	FDR	log2FC	FDR	log2FC	FDR	log2FC
LYNX1	Ly6/neurotoxin 1	0.162708	0.326892	0.000260607	0.531369	0.107348	0.280739
SPATA13	spermatogenesis associated 13	0.973659	0.06416	0.967995	-0.0772054	0.625316	0.291121
GOLGA8M	golgin A8 family member M	nan	1	nan	-inf	nan	2.44478
U3	Small nucleolar RNA U3	0.343688	0.477354	0.949429	-0.00381262	0.0270902	0.702284
SNORA51	Small nucleolar RNA SNORA51	nan	-1.01338	nan	-1.28901	nan	-0.467779
SNORA2	Small nucleolar RNA SNORA2/SNORA34 family	nan	-0.00891472	nan	-0.867082	0.253668	-2.05741
LINC01347	long intergenic non-protein coding RNA 1347	nan	-1	nan	-inf	nan	-0.872244
SNORA7	Small nucleolar RNA SNORA7	nan	1.57603	nan	1.30039	nan	0.127756
LINC00484	long intergenic non-protein coding RNA 484	nan	inf	nan	-inf	nan	inf
DNAJC9-AS1	DNAJC9 antisense RNA 1	0.823754	-0.15833	0.784082	0.0908012	9.94754e-06	1.12504
DGCR5	DiGeorge syndrome critical region gene 5 (non-protein coding)	0.992568	-0.00859034	0.207422	-1.09235	0.672838	-0.368837
LINC01238	long intergenic non-protein coding RNA 1238	0.990041	-0.00835379	0.398651	0.62332	0.821952	0.204673
ALG1L9P	asparagine-linked glycosylation 1-like 9, pseudogene	nan	-0.430634	0.619282	0.882305	0.0453751	2.11343
CTSLP2	cathepsin L pseudogene 2	0.287803	-0.70905	0.927958	0.0158007	0.236279	0.503977
EMG1	EMG1, N1-specific pseudouridine methyltransferase	0.824445	0.0839764	0.736045	-0.140207	0.253317	-0.215475
COG8	component of oligomeric golgi complex 8	0.87765	0.0484449	0.00575611	0.252932	0.764253	-0.0530619
uc_338	TUC338	nan	-0.189065	0.16798	-1.56472	0.267001	-1.1625
RNA5-8S5	RNA, 5.8S ribosomal 5	2.21788e-05	-0.410231	0.489608	0.0284534	3.76233e-34	-1.10713
Metazoa_SRP	Metazoan signal recognition particle RNA	0.34833	0.525877	0.00696733	0.90235	0.135183	0.562738
MATR3	matrin 3	0.713441	-0.0618484	0.0235276	-0.250751	1.70738e-07	-0.449471
U6	U6 spliceosomal RNA	nan	1	nan	1.30039	nan	1.11548
C2orf81	chromosome 2 open reading frame 81	0.831297	-0.128607	0.882894	-0.0986223	0.683948	0.108785
TSPAN6	tetraspanin 6	0.371454	0.214651	7.16019e-05	0.482119	9.24435e-05	-0.612082
DPM1	dolichyl-phosphate mannosyltransferase subunit 1, catalytic	0.645178	-0.0947793	0.0153608	-0.317057	0.073701	0.185358
SCYL3	SCY1 like pseudokinase 3	0.701911	-0.217016	0.414902	-0.336031	0.0455742	-0.61321
C1orf112	chromosome 1 open reading frame 112	0.843547	-0.0856677	0.0699537	-0.438068	0.0185021	-0.49646
FGR	FGR proto-oncogene, Src family tyrosine kinase	nan	-inf	nan	-inf	nan	inf
CFH	complement factor H	nan	-1.59686	nan	-0.867082	0.759463	-0.468346
FUCA2	fucosidase, alpha-L- 2, plasma	0.000327185	0.688416	0.0231964	0.393307	0.933998	-0.0335863
GCLC	glutamate-cysteine ligase catalytic subunit	0.443245	0.210183	0.975334	-0.0655867	0.0634056	0.290866
NFYA	nuclear transcription factor Y subunit alpha	0.66168	-0.117457	0.00933182	-0.437966	0.0872336	0.242816
STPG1	sperm tail PG-rich repeat containing 1	0.507344	0.359848	0.969246	-0.0379885	0.0198209	0.679311
NIPAL3	NIPA like domain containing 3	0.476632	-0.224824	0.814864	0.0186359	0.681805	0.0814146
LAS1L	LAS1 like, ribosome biogenesis factor	0.982094	0.0259178	0.536834	-0.183769	0.443774	0.139885
ENPP4	ectonucleotide pyrophosphatase/phosphodiesterase 4 (putative)	nan	0.573839	nan	-1.28582	nan	0.114966
SEMA3F	semaphorin 3F	0.716261	-0.156372	0.237467	0.241028	0.543875	0.144836
CFTR	cystic fibrosis transmembrane conductance regulator	nan	-inf	nan	-inf	nan	-inf
ANKIB1	ankyrin repeat and IBR domain containing 1	0.126541	0.241155	0.234041	0.125421	0.823446	0.0225688
CYP51A1	cytochrome P450 family 51 subfamily A member 1	nan	1.57603	nan	0.720846	nan	0.127756
KRIT1	KRIT1, ankyrin repeat containing	0.239936	0.286662	0.814864	0.0251291	0.776404	0.0485716
RAD52	RAD52 homolog, DNA repair protein	0.811437	-0.156517	0.984574	-0.0393513	0.00117672	0.906504
MYH16	myosin heavy chain 16 pseudogene	nan	-inf	nan	inf	nan	-inf
BAD	BCL2 associated agonist of cell death	0.909266	0.0372096	0.122754	0.0991265	1.04736e-12	-0.644427
LAP3	leucine aminopeptidase 3	0.693619	-0.128784	0.123311	0.229245	0.567951	-0.140068
CD99	CD99 molecule (Xg blood group)	0.114795	-0.166279	0.0201882	0.135694	0.280417	-0.117332
HS3ST1	heparan sulfate-glucosamine 3-sulfotransferase 1	nan	inf	nan	-inf	nan	inf
AOC1	amine oxidase, copper containing 1	nan	1	nan	3.1788	nan	-inf
WNT16	Wnt family member 16	0.000294163	-2.22152	3.58208e-08	-3.95524	0.00542093	1.05937
HECW1	HECT, C2 and WW domain containing E3 ubiquitin protein ligase 1	nan	1.80353	nan	1.52588	0.806246	0.704544
MAD1L1	MAD1 mitotic arrest deficient like 1	0.342413	-0.23614	0.799799	-0.106471	0.546203	0.109703
LASP1	LIM and SH3 protein 1	0.845067	0.0602436	0.210135	0.116819	0.797628	-0.0535216
SNX11	sorting nexin 11	0.653587	0.164134	0.356654	0.143768	0.0601708	-0.350206
TMEM176A	transmembrane protein 176A	nan	inf	nan	inf	nan	-inf
M6PR	mannose-6-phosphate receptor, cation dependent	0.472952	-0.397664	0.995857	-0.0289417	0.0119245	-0.930361
KLHL13	kelch like family member 13	7.87307e-06	0.323776	0.000237143	0.209262	7.91813e-11	-0.453588
CYP26B1	cytochrome P450 family 26 subfamily B member 1	2.42952e-05	-0.263937	1.75411e-67	-1.00576	2.14333e-24	0.544499
ICA1	islet cell autoantigen 1	1.8874e-05	0.424456	8.38067e-06	0.356508	0.000347089	-0.374198
DBNDD1	dysbindin domain containing 1	0.708178	0.10864	0.647576	-0.155286	9.3317e-11	-0.860992
ALS2	ALS2, alsin Rho guanine nucleotide exchange factor	0.625682	0.2104	0.71421	-0.144229	0.524935	0.154819
CASP10	caspase 10	nan	-inf	nan	1.30039	nan	1.70454
CFLAR	CASP8 and FADD like apoptosis regulator	0.759384	-0.147289	0.922092	-0.00158546	0.0032921	-0.756058
TFPI	tissue factor pathway inhibitor	0.0931016	-1.11207	4.03775e-07	1.70748	0.00254622	-1.84949
NDUFAF7	NADH:ubiquinone oxidoreductase complex assembly factor 7	0.882905	-0.0569104	0.692997	0.0363473	0.186384	0.213394
RBM5	RNA binding motif protein 5	0.437588	0.173524	0.246384	0.127488	2.80655e-09	-0.792469
MTMR7	myotubularin related protein 7	0.978524	-0.00853778	0.833461	0.0851532	0.596705	0.232298
SLC7A2	solute carrier family 7 member 2	0.949112	-0.0208648	1.53918e-31	1.61991	0.0882042	0.322184
ARF5	ADP ribosylation factor 5	0.92238	0.147504	0.371465	0.46902	0.972028	0.0316261
SARM1	sterile alpha and TIR motif containing 1	0.925552	0.0513777	0.150106	0.166826	0.000336108	-0.531395
POLDIP2	DNA polymerase delta interacting protein 2	0.72785	-0.0697595	0.727453	0.008824	0.686312	-0.0670209
PLXND1	plexin D1	0.0791213	0.482024	0.00107249	0.627425	0.0140723	0.519134
AK2	adenylate kinase 2	0.138822	-0.17703	3.82823e-07	-0.490245	0.140992	-0.163361
CD38	CD38 molecule	nan	-2.00666	nan	-1.28582	nan	-1.87891
FKBP4	FK506 binding protein 4	0.000429756	-0.302145	0.0771019	-0.208945	0.362352	0.0716212
KDM1A	lysine demethylase 1A	0.755954	-0.0520445	1.25975e-06	-0.441504	0.777095	0.0207492
RBM6	RNA binding motif protein 6	0.864865	-0.0291586	0.0339423	-0.307919	0.867302	-0.034305
CAMKK1	calcium/calmodulin dependent protein kinase kinase 1	0.975712	0.0517989	0.911518	0.0441191	0.177549	0.584962
RECQL	RecQ like helicase	0.428133	0.221325	0.241069	0.180707	0.946405	-0.0345307
VPS50	VPS50, EARP/GARPII complex subunit	0.164547	0.38678	0.00425625	0.523301	0.895933	0.0201131
ARHGAP33	Rho GTPase activating protein 33	0.555873	0.289174	0.936454	-0.0136943	0.35077	0.263475
NDUFAB1	NADH:ubiquinone oxidoreductase subunit AB1	0.481244	-0.0938616	0.00115371	-0.322985	0.00881114	-0.233032
PDK4	pyruvate dehydrogenase kinase 4	0.318294	-1.59387	0.00736268	1.50959	0.391882	-0.982341
SLC22A16	solute carrier family 22 member 16	nan	inf	nan	-inf	nan	inf
ZMYND10	zinc finger MYND-type containing 10	nan	inf	nan	inf	nan	inf
ABCB5	ATP binding cassette subfamily B member 5	nan	-inf	nan	-inf	nan	inf
ARX	aristaless related homeobox	0.688052	-0.467126	0.592076	0.315776	0.00150446	-2.60284
SLC25A13	solute carrier family 25 member 13	0.110645	0.29247	0.0864723	0.201398	1.06692e-18	-1.34644
ST7	suppression of tumorigenicity 7	0.733911	-0.0955585	0.542102	-0.170665	0.577174	0.0864667
CDC27	cell division cycle 27	0.735609	0.0902839	0.307983	-0.17943	0.3026	-0.145058
SLC4A1	solute carrier family 4 member 1 (Diego blood group)	0.937232	-0.169399	0.913779	-0.210988	0.942396	-0.132046
CALCR	calcitonin receptor	nan	-inf	nan	-inf	nan	0.127756
HCCS	holocytochrome c synthase	0.0723927	-0.373969	0.525725	-0.19502	0.0756414	-0.326428
DVL2	dishevelled segment polarity protein 2	0.0861315	0.2567	6.9372e-05	0.38157	0.0370222	0.23458
PRSS22	protease, serine 22	0.973957	0.0482341	0.651862	-0.468255	0.218649	0.721529
UPF1	UPF1, RNA helicase and ATPase	0.966773	0.0243922	0.926131	-0.0293003	0.0371537	0.254307
SKAP2	src kinase associated phosphoprotein 2	0.428054	0.373058	0.701103	0.143152	0.0119732	0.673417
SLC25A5	solute carrier family 25 member 5	0.0390797	-0.139687	1.1889e-10	-0.399453	2.75847e-07	0.263258
MCUB	mitochondrial calcium uniporter dominant negative beta subunit	0.461139	0.329795	1.74004e-06	-1.46868	0.000103293	0.899467
POLR2J	RNA polymerase II subunit J	0.653182	-0.0617014	0.732078	-0.0975257	0.2154	0.0791212
DHX33	DEAH-box helicase 33	0.95719	-0.0338694	0.0896018	0.285625	0.0261813	0.392634
MEOX1	mesenchyme homeobox 1	nan	-inf	nan	inf	nan	-inf
THSD7A	thrombospondin type 1 domain containing 7A	1.47944e-06	-0.863296	3.80775e-40	-2.55966	1.6504e-23	-1.84364
LIG3	DNA ligase 3	0.872484	-0.0973603	0.237467	-0.382378	0.00152508	0.687456
RPAP3	RNA polymerase II associated protein 3	0.915497	-0.0425098	0.73952	-0.124373	0.494982	0.145688
ACSM3	acyl-CoA synthetase medium-chain family member 3	0.653563	-0.206942	0.84362	-0.131935	0.84116	-0.0815915
REXO5	RNA exonuclease 5	0.981148	0.0348423	0.885025	-0.118914	0.0710529	0.532233
CIAPIN1	cytokine induced apoptosis inhibitor 1	0.685052	0.0989584	0.958841	-0.0443696	0.00791997	-0.317174
SPPL2B	signal peptide peptidase like 2B	0.239739	0.300431	0.006702	0.437651	0.044121	0.358763
FAM214B	family with sequence similarity 214 member B	0.984288	0.0247417	0.448845	0.126814	0.000626252	-0.638072
COPZ2	coatomer protein complex subunit zeta 2	0.671476	0.149791	4.56903e-12	0.984059	1.04286e-07	-1.07619
PRKAR2B	protein kinase cAMP-dependent type II regulatory subunit beta	0.222738	-0.190786	1.27389e-08	-0.675585	0.118919	-0.207941
MSL3	male-specific lethal 3 homolog (Drosophila)	0.864745	0.106698	0.883011	-0.121519	0.511988	-0.199288
CREBBP	CREB binding protein	0.991605	-0.000247694	0.672621	0.0368255	0.116417	-0.267907
TSPOAP1	TSPO associated protein 1	0.671245	0.442535	1.31486e-05	1.69167	0.820208	0.164387
PON1	paraoxonase 1	0.623975	-0.83936	0.827492	-0.37668	0.294819	0.761413
GCFC2	GC-rich sequence DNA-binding factor 2	0.874672	-0.0810152	0.844701	0.0203882	0.872643	-0.0678286
WDR54	WD repeat domain 54	0.660458	-0.0852329	0.00419554	-0.346799	0.942957	-0.00737359
CROT	carnitine O-octanoyltransferase	0.683739	-0.166763	0.579507	-0.207815	0.000505068	-0.812973
ABCB4	ATP binding cassette subfamily B member 4	0.00319035	1.24318	0.0481145	-1.15243	0.393429	0.424995
KMT2E	lysine methyltransferase 2E	0.530506	0.215843	0.764543	0.0423483	0.707811	-0.113694
RHBDD2	rhomboid domain containing 2	0.618045	-0.0649403	0.0100366	0.136171	3.91896e-21	-0.673133
SOX8	SRY-box 8	nan	inf	nan	-inf	nan	-inf
IBTK	inhibitor of Bruton tyrosine kinase	0.908968	-0.0499298	0.916335	-0.0717387	0.36857	-0.225501
ZNF195	zinc finger protein 195	0.839574	0.0789608	0.000343165	-0.630438	0.420766	-0.173284
MYCBP2	MYC binding protein 2, E3 ubiquitin protein ligase	0.896817	-0.0570699	0.00999616	0.397847	0.0826195	-0.358848
FBXL3	F-box and leucine rich repeat protein 3	0.466549	0.257702	0.576402	-0.204485	0.552097	-0.165965
ITGAL	integrin subunit alpha L	nan	-1	nan	-1.29546	nan	1.44478
PDK2	pyruvate dehydrogenase kinase 2	0.113886	-0.525112	0.272232	-0.38849	0.0263364	-0.601969
ITGA3	integrin subunit alpha 3	0.972145	0.021716	1.89444e-10	0.914283	0.15501	-0.309846
ZFX	zinc finger protein, X-linked	0.315077	0.344338	0.187305	0.298186	0.0624879	-0.480227
LAMP2	lysosomal associated membrane protein 2	0.829233	-0.0582535	0.000643343	0.334485	0.0769446	-0.241775
ITGA2B	integrin subunit alpha 2b	0.0989301	1.26238	0.220919	0.877317	5.15195e-05	2.00743
ASB4	ankyrin repeat and SOCS box containing 4	nan	-inf	nan	-inf	nan	0.115477
GDE1	glycerophosphodiester phosphodiesterase 1	0.733898	-0.0700937	0.0168957	0.234681	4.21355e-05	-0.47511
C19orf60	chromosome 19 open reading frame 60	0.494411	-0.100067	0.162154	-0.199417	8.38086e-07	-0.438154
CRLF1	cytokine receptor like factor 1	0.552607	0.163072	1.55063e-05	-0.707452	0.70355	-0.0954364
OSBPL7	oxysterol binding protein like 7	0.951691	-0.0606476	0.11398	0.381043	0.608988	0.137521
TMEM98	transmembrane protein 98	0.469887	0.120078	0.73952	-0.105111	4.11516e-29	-1.06156
YBX2	Y-box binding protein 2	0.252081	-0.351959	2.89352e-05	-0.958001	0.000735632	0.64097
MAP3K14	mitogen-activated protein kinase kinase kinase 14	0.270193	0.673883	0.176727	0.593202	0.678872	0.214403
ABCC8	ATP binding cassette subfamily C member 8	6.84377e-13	-0.754316	1.8931e-19	0.752015	1.22368e-80	-2.7942
CACNG3	calcium voltage-gated channel auxiliary subunit gamma 3	nan	inf	nan	-inf	nan	-inf
TMEM132A	transmembrane protein 132A	0.646003	-0.122606	0.265856	0.122976	0.000164412	-0.493362
AP2B1	adaptor related protein complex 2 beta 1 subunit	0.274551	-0.166633	0.0109936	-0.320187	6.38269e-05	-0.430897
TAC1	tachykinin precursor 1	nan	-inf	nan	-0.295456	nan	-inf
ZNF263	zinc finger protein 263	0.804069	0.109855	0.51786	0.117421	0.256892	0.207687
CX3CL1	C-X3-C motif chemokine ligand 1	0.573343	-0.292936	0.322564	0.271989	0.539429	-0.221167
SPATA20	spermatogenesis associated 20	0.204117	0.179346	5.30416e-11	0.536099	2.9648e-05	-0.451114
CACNA1G	calcium voltage-gated channel subunit alpha1 G	0.0864258	-0.565112	0.72635	-0.167289	0.00489068	0.612839
TNFRSF12A	TNF receptor superfamily member 12A	0.55021	-0.178683	0.109365	0.242161	0.764026	-0.0853951
DLX6	distal-less homeobox 6	0.935305	-0.0322784	0.283371	-0.348975	0.925574	-0.0333269
MAP3K9	mitogen-activated protein kinase kinase kinase 9	0.554487	-0.248668	0.923636	-0.0847864	0.87788	-0.0614986
RALA	RAS like proto-oncogene A	0.981148	0.0123061	0.185645	-0.195977	0.772205	-0.0468707
BAIAP2L1	BAI1 associated protein 2 like 1	0.63833	-0.307757	2.61799e-06	-1.90556	3.53607e-08	1.42446
KDM7A	lysine demethylase 7A	0.868675	-0.0652195	0.201326	-0.301355	0.137284	0.252154
ETV1	ETS variant 1	0.0180318	-0.450896	0.109142	0.245285	3.43486e-06	-0.767981
AGK	acylglycerol kinase	0.961113	-0.00829905	0.36171	-0.220932	0.883896	-0.0349946
ALDH3B1	aldehyde dehydrogenase 3 family member B1	0.594806	0.415038	1.00269e-05	1.44627	9.29739e-05	-2.75853
TTC22	tetratricopeptide repeat domain 22	nan	inf	nan	inf	nan	-inf
PHTF2	putative homeodomain transcription factor 2	0.688457	-0.111221	0.527073	-0.181484	2.25773e-07	0.68708
CCL26	C-C motif chemokine ligand 26	nan	-inf	nan	inf	nan	-inf
FARP2	FERM, ARH/RhoGEF and pleckstrin domain protein 2	0.69756	0.152498	0.111894	0.266156	0.842528	0.0375772
USH1C	USH1 protein network component harmonin	0.680652	-0.267933	0.181196	0.445974	0.00020942	-1.48505
GGCT	gamma-glutamylcyclotransferase	0.158901	-0.182674	2.35297e-09	-0.618311	0.0386873	0.197439
DBF4	DBF4 zinc finger	0.951691	0.0508044	0.000136797	-0.741215	0.232186	0.240788
TBXA2R	thromboxane A2 receptor	0.770593	0.216844	0.045077	0.629273	0.0287169	-0.940331
IFRD1	interferon related developmental regulator 1	0.579756	0.12695	0.484572	-0.158487	1.16678e-06	0.509151
COX10	COX10, heme A:farnesyltransferase cytochrome c oxidase assembly factor	0.964647	0.042113	0.270657	-0.362953	0.809762	0.0649049
GTF2IRD1	GTF2I repeat domain containing 1	0.409029	0.186342	0.622905	0.0431239	0.136801	0.198047
PAF1	PAF1 homolog, Paf1/RNA polymerase II complex component	0.888944	-0.0460015	0.899493	-0.0081036	0.596739	-0.107405
VPS41	VPS41, HOPS complex subunit	0.867928	0.056782	0.0120253	0.223001	1.84582e-20	-1.01278
ARHGAP44	Rho GTPase activating protein 44	0.777769	0.476771	0.732753	0.333255	0.191474	0.964931
ELAC2	elaC ribonuclease Z 2	0.859937	0.0630072	0.425485	-0.186072	0.977992	-0.024018
SCIN	scinderin	nan	1.5805	nan	0.300395	0.372257	1.70454
ARSD	arylsulfatase D	0.488215	0.181018	1.12927e-07	0.622244	3.63933e-15	-1.26567
PNPLA4	patatin like phospholipase domain containing 4	0.0295161	0.44262	0.041642	0.311267	0.00675456	0.445156
MYH13	myosin heavy chain 13	nan	-2.58941	nan	-0.2836	nan	-1.47393
ADIPOR2	adiponectin receptor 2	0.544974	0.131231	0.84109	-0.0159471	0.323864	0.110296
CDKL3	cyclin dependent kinase like 3	0.867074	-0.127845	0.76272	-0.204286	0.260777	0.385437
UPP2	uridine phosphorylase 2	nan	0.576029	nan	-1.29546	nan	1.12163
MARK4	microtubule affinity regulating kinase 4	0.628487	-0.104489	0.972449	-0.0441744	0.000459031	0.351238
PROM1	prominin 1	nan	-0.425433	nan	-2.86856	0.52413	-0.884864
CCDC124	coiled-coil domain containing 124	0.274828	-0.153605	0.109323	-0.231823	0.495472	-0.100666
CEACAM21	carcinoembryonic antigen related cell adhesion molecule 21	nan	-inf	nan	inf	nan	-inf
PAFAH1B1	platelet activating factor acetylhydrolase 1b regulatory subunit 1	0.370327	0.137397	0.362842	-0.156365	0.000161483	-0.356196
NOS2	nitric oxide synthase 2	nan	-0.00763332	0.943797	-0.0903206	0.00375104	2.21613
DNAH9	dynein axonemal heavy chain 9	nan	0	nan	-inf	nan	2.70454
KIAA0100	KIAA0100	0.640657	0.131243	0.00182869	0.371585	0.338635	-0.177101
SLC13A2	solute carrier family 13 member 2	nan	-inf	nan	inf	nan	-inf
GAS7	growth arrest specific 7	0.557757	-0.723509	0.147308	0.836362	0.0330121	1.148
TRAPPC6A	trafficking protein particle complex 6A	0.000203885	0.596443	0.239696	0.169248	7.20901e-08	0.732171
MATK	megakaryocyte-associated tyrosine kinase	nan	-0.230664	0.697278	-0.771638	0.0146557	1.95358
CD79B	CD79b molecule	nan	0.16064	nan	-1.70294	0.712726	-0.558551
SCN4A	sodium voltage-gated channel alpha subunit 4	nan	-inf	nan	-inf	nan	inf
ST7L	suppression of tumorigenicity 7 like	0.914583	0.0919332	0.956401	-0.0178762	9.54093e-07	0.993978
TKTL1	transketolase like 1	nan	inf	nan	inf	nan	inf
PAX6	paired box 6	nan	0	nan	0.300395	nan	0.115477
RPUSD1	RNA pseudouridylate synthase domain containing 1	0.17337	-0.333162	0.690109	-0.154484	0.0916478	-0.343867
RHBDF1	rhomboid 5 homolog 1	0.0345739	0.567376	9.64328e-10	1.11932	0.599651	0.14466
LUC7L	LUC7 like	0.933124	0.0343981	0.120653	-0.246619	0.00154535	-0.384711
CACNA2D2	calcium voltage-gated channel auxiliary subunit alpha2delta 2	0.560483	0.148509	4.57053e-11	0.693206	0.981649	-0.0142056
BAIAP3	BAI1 associated protein 3	0.731482	0.0883577	0.253315	0.0857731	0.976618	-0.0227813
TSR3	TSR3, acp transferase ribosome maturation factor	0.49462	0.592905	0.180113	0.690652	0.819431	-0.217805
PIGQ	phosphatidylinositol glycan anchor biosynthesis class Q	0.243181	0.247679	0.0038293	0.342959	0.386074	-0.164363
CRAMP1	cramped chromatin regulator homolog 1	0.905796	0.113047	0.499184	0.223094	0.569921	-0.223874
TEAD3	TEA domain transcription factor 3	0.376272	-0.248416	0.926131	-0.0865804	0.25941	0.205556
DNAJC11	DnaJ heat shock protein family (Hsp40) member C11	0.967532	-0.160622	0.833461	0.302058	0.0276507	1.60351
FMO3	flavin containing monooxygenase 3	nan	inf	nan	inf	nan	inf
MYLIP	myosin regulatory light chain interacting protein	0.927876	-0.0630098	0.00744623	0.604061	0.0208286	0.550886
NOX1	NADPH oxidase 1	0.49764	0.648439	0.47326	0.474259	0.828089	-0.191475
E2F2	E2F transcription factor 2	0.250106	-0.455612	0.878014	0.0143397	0.126401	-0.484046
PSMB1	proteasome subunit beta 1	0.882884	-0.0186543	9.98573e-07	-0.331252	0.0189328	-0.156786
SYN1	synapsin I	0.000215415	-0.722466	1.29935e-07	-0.991491	0.0505241	-0.375655
JARID2	jumonji and AT-rich interaction domain containing 2	0.118167	0.259195	0.0218685	-0.3619	0.0686775	0.214169
CDKL5	cyclin dependent kinase like 5	0.7194	-0.182299	0.0661749	-0.553733	0.730821	0.0838243
CAMK1G	calcium/calmodulin dependent protein kinase IG	nan	2.99666	nan	3.96792	0.662572	1.70454
CDK11A	cyclin dependent kinase 11A	nan	2.5805	nan	0.720846	nan	1.70454
NADK	NAD kinase	0.811437	-0.0956917	0.606722	0.087895	0.00116741	-0.666693
TFAP2B	transcription factor AP-2 beta	0.641248	-0.127133	1.17043e-29	-1.71819	2.04638e-17	-1.27373
TFAP2D	transcription factor AP-2 delta	nan	-1.23066	nan	-4.10662	0.275986	-1.10662
DLEC1	deleted in lung and esophageal cancer 1	0.967676	0.0207843	0.414423	0.0972318	0.00585946	-0.445311
CYTH3	cytohesin 3	0.00207188	0.361529	0.000771615	0.299091	1.19779e-10	0.605385
ADAM22	ADAM metallopeptidase domain 22	0.836765	0.0592784	5.14993e-10	0.490427	0.103823	-0.188386
SYPL1	synaptophysin like 1	0.678233	0.121646	1.74456e-05	0.475393	0.161158	-0.225193
CYB561	cytochrome b561	1.01288e-10	0.584367	0.00778589	-0.320762	1.0464e-40	-1.38674
SPAG9	sperm associated antigen 9	0.946079	0.0257235	0.151514	0.126509	0.0079944	0.263297
CELSR3	cadherin EGF LAG seven-pass G-type receptor 3	0.777491	0.0956106	0.0297152	0.269434	0.775055	0.0353749
AASS	aminoadipate-semialdehyde synthase	0.624242	0.372426	0.750297	0.157975	0.0126129	0.897102
PLEKHG6	pleckstrin homology and RhoGEF domain containing G6	nan	0.989993	0.554573	1.03611	0.297587	1.43567
SS18L2	SS18 like 2	0.88143	0.0612437	0.999287	-0.0542479	0.86637	-0.0508395
MPND	MPN domain containing	0.991909	0.0136458	0.90183	-0.0846537	0.258867	0.148612
MGST1	microsomal glutathione S-transferase 1	nan	0	nan	-1.29546	nan	2.44233
CRY1	cryptochrome circadian clock 1	0.984982	0.0231749	0.000418158	-0.834373	0.932465	0.0319283
PGLYRP1	peptidoglycan recognition protein 1	nan	-inf	nan	-inf	nan	inf
NFIX	nuclear factor I X	0.987385	0.0122396	0.000244203	0.430415	4.61918e-06	-0.690285
ST3GAL1	ST3 beta-galactoside alpha-2,3-sialyltransferase 1	0.0397623	-0.410966	1.97413e-09	0.809173	1.22923e-14	-1.3827
MMP25	matrix metallopeptidase 25	nan	-1.00666	nan	0.299145	nan	0.69788
IL32	interleukin 32	0.76184	-0.300654	0.780501	0.0945523	0.574919	-0.330504
PKD1	polycystin 1, transient receptor potential channel interacting	0.432845	0.228988	0.0197629	0.377548	4.5672e-06	0.710709
MAPK8IP2	mitogen-activated protein kinase 8 interacting protein 2	0.0175113	-0.325692	6.10902e-06	-0.557249	0.000929684	-0.408589
MED24	mediator complex subunit 24	0.955008	0.0471616	0.224705	0.271077	0.771221	-0.100014
RHOBTB2	Rho related BTB domain containing 2	0.869507	-0.106578	0.354108	0.222918	0.554871	-0.224117
HEATR5B	HEAT repeat containing 5B	0.91663	-0.0587078	0.884594	-0.0984414	0.000456667	0.623483
SEC62	SEC62 homolog, preprotein translocation factor	0.902218	0.0529459	0.467071	0.0912503	0.608524	-0.112966
RPS20	ribosomal protein S20	0.199558	-0.107334	0.969246	-0.0561425	8.61655e-30	0.606606
CSDE1	cold shock domain containing E1	0.0890006	-0.15667	0.188831	-0.170148	0.482805	0.0553531
UBE3C	ubiquitin protein ligase E3C	0.802312	0.0829739	0.117347	0.163307	4.02134e-07	-0.635704
REV3L	REV3 like, DNA directed polymerase zeta catalytic subunit	0.443245	-0.287487	0.326125	-0.309005	0.0771045	-0.452657
TENM1	teneurin transmembrane protein 1	0.80448	-0.342753	0.236804	-0.972693	0.285498	-0.833551
PAX7	paired box 7	nan	-inf	nan	-inf	nan	inf
MASP2	mannan binding lectin serine peptidase 2	nan	-1	nan	-1.29546	nan	0.115477
IYD	iodotyrosine deiodinase	nan	-inf	nan	inf	nan	-inf
FAM76A	family with sequence similarity 76 member A	0.931087	0.0664235	0.388248	-0.297957	0.869378	0.0382404
TRAF3IP3	TRAF3 interacting protein 3	0.941276	-0.0766138	0.687504	0.15311	0.0960574	0.586465
POMT2	protein O-mannosyltransferase 2	0.720535	0.170637	0.313573	0.216797	0.450944	0.183534
VTA1	vesicle trafficking 1	0.992758	0.00654456	0.525834	-0.150901	0.438056	0.102077
MLXIPL	MLX interacting protein like	0.297199	0.71119	0.397039	0.460927	0.00143306	1.2772
BAZ1B	bromodomain adjacent to zinc finger domain 1B	0.69472	0.0807555	0.907263	-0.0622169	2.44922e-11	-0.669069
RANBP9	RAN binding protein 9	0.981946	0.00548963	0.789594	0.00311524	0.296084	-0.141092
ETV7	ETS variant 7	nan	0.45123	0.882847	0.175467	0.550237	-1.29879
SPRTN	SprT-like N-terminal domain	0.718708	-0.165159	0.25101	-0.376096	0.0812159	-0.449421
METTL13	methyltransferase like 13	0.739156	-0.0772718	0.19443	-0.223374	0.390244	-0.132931
DYRK4	dual specificity tyrosine phosphorylation regulated kinase 4	0.892316	-0.046824	0.812447	-0.00568238	0.668848	0.0644358
ZNF207	zinc finger protein 207	0.906055	-0.0138139	2.69712e-05	-0.382939	0.0218762	-0.211642
UQCRC1	ubiquinol-cytochrome c reductase core protein I	0.979569	0.0161746	0.00791313	-0.270701	0.686054	-0.0556334
STARD3NL	STARD3 N-terminal like	0.843732	0.0513941	2.48281e-08	-0.544604	0.0449482	-0.208439
CD9	CD9 molecule	0.998502	0.00712232	0.121337	-0.212384	3.91431e-25	-0.990251
HHATL	hedgehog acyltransferase-like	nan	0	nan	0.720846	nan	0.127756
NCAPD2	non-SMC condensin I complex subunit D2	0.942536	-0.0104143	0.0193303	-0.353781	2.29281e-12	0.801999
IFFO1	intermediate filament family orphan 1	0.978019	0.0111212	0.783816	0.0222459	0.272969	-0.253165
GIPR	gastric inhibitory polypeptide receptor	0.393136	0.425236	0.97651	-0.0764465	0.649239	0.17544
PHF7	PHD finger protein 7	0.471783	0.654699	0.342771	0.590505	0.0391663	1.05609
SEMA3G	semaphorin 3G	0.512672	0.919106	0.124941	1.25255	0.354912	-1.62005
NISCH	nischarin	0.192943	0.2161	0.000215481	0.376421	5.02196e-06	-0.567871
STAB1	stabilin 1	0.255444	-0.125677	3.34248e-12	-0.546679	5.56786e-06	-0.348037
FUZ	fuzzy planar cell polarity protein	0.687166	-0.103184	0.0558159	0.213038	0.588107	0.0690498
SLC6A13	solute carrier family 6 member 13	nan	-0.430634	nan	0.299145	nan	0.438121
IDS	iduronate 2-sulfatase	0.000841503	-0.317041	0.0304974	-0.256494	0.0651609	-0.188307
PRSS3	protease, serine 3	0.998836	0.00522042	1.08303e-12	-0.774586	5.5291e-08	-0.579867
ZNF200	zinc finger protein 200	0.84666	-0.10559	0.0944939	-0.476734	0.499595	-0.20693
CD4	CD4 molecule	nan	-0.465202	0.946547	-0.15605	0.578524	-0.757314
LRRC23	leucine rich repeat containing 23	0.918342	0.066005	0.582657	0.0961289	9.22439e-08	0.976832
BTK	Bruton tyrosine kinase	nan	-1.74857	nan	-2.60375	nan	-3.19684
HFE	hemochromatosis	nan	0	nan	-inf	nan	1.11548
SCMH1	sex comb on midleg homolog 1 (Drosophila)	0.96482	0.0256941	0.105013	0.267846	0.936471	-0.0437116
FYN	FYN proto-oncogene, Src family tyrosine kinase	0.201318	-0.180939	3.06438e-15	-0.827207	0.000485572	-0.375267
HIVEP2	human immunodeficiency virus type I enhancer binding protein 2	0.754438	0.174639	0.0785877	0.413461	0.546053	-0.209723
FMO1	flavin containing monooxygenase 1	0.985955	0.0311214	0.507165	-0.366753	0.558093	-0.271647
ELOA	elongin A	0.86874	0.0654099	0.785772	0.000872545	0.0271898	0.305755
LYPLA2	lysophospholipase II	0.808816	0.0548444	0.0309566	-0.239625	4.85262e-22	-0.779927
CLCN6	chloride voltage-gated channel 6	1.32066e-14	1.13907	0.856548	0.0138786	0.00433675	0.464563
MRC2	mannose receptor C type 2	0.068511	-0.147718	3.38879e-21	0.498559	0.00248277	-0.219825
TSPAN9	tetraspanin 9	0.843239	0.0684758	6.08521e-05	0.428132	6.36875e-05	-0.55023
BTBD7	BTB domain containing 7	0.553772	0.209099	0.118548	0.281299	0.273607	-0.263229
APBA3	amyloid beta precursor protein binding family A member 3	0.465723	0.232044	0.182336	0.221344	0.0158536	0.409639
MKS1	Meckel syndrome, type 1	0.28239	0.386175	0.26385	0.273388	0.253527	-0.325578
ABHD5	abhydrolase domain containing 5	0.631545	-0.263946	0.35834	-0.386322	0.119266	-0.52463
ANOS1	anosmin 1	0.386869	-0.847683	1.22405e-05	-4.37054	0.00562908	-1.96976
AKAP8L	A-kinase anchoring protein 8 like	0.880888	-0.287069	0.978813	-0.122683	0.531935	-0.648273
MBTD1	mbt domain containing 1	0.303681	0.270024	0.936349	-0.00934523	0.574021	0.117028
UTP18	UTP18, small subunit processome component	0.937495	0.0411304	0.271083	-0.234613	0.0272015	0.302642
RNF216	ring finger protein 216	0.930645	0.0450946	0.376912	0.0993159	0.0631385	-0.25812
TTC19	tetratricopeptide repeat domain 19	0.31637	0.226092	0.0485415	0.250187	0.451545	0.120042
PTBP1	polypyrimidine tract binding protein 1	0.841178	0.0393291	0.222853	-0.15776	0.00195963	0.206558
DPF1	double PHD fingers 1	0.993939	0.00504978	0.971949	-0.0165037	1.26248e-07	-1.38988
SYT7	synaptotagmin 7	0.536163	0.329523	0.975	-0.0236222	0.25672	0.364294
LARS2	leucyl-tRNA synthetase 2, mitochondrial	0.800162	-0.118518	0.316681	-0.31984	0.0658859	-0.467898
PIK3C2A	phosphatidylinositol-4-phosphate 3-kinase catalytic subunit type 2 alpha	0.135632	0.278467	0.00128235	0.375298	0.205259	0.184386
PLAUR	plasminogen activator, urokinase receptor	0.598614	-0.267565	0.392265	0.195929	0.835529	-0.0975459
ANLN	anillin actin binding protein	0.594219	0.153717	0.000788218	-0.567229	3.8646e-13	0.910014
WIZ	widely interspaced zinc finger motifs	0.721111	0.102753	0.960147	-0.0385959	0.038544	0.268757
RABGAP1	RAB GTPase activating protein 1	0.672864	0.140249	0.0957081	0.21382	0.906466	0.0165532
DCN	decorin	0.0567208	-0.254467	4.10307e-71	1.48129	1.60772e-23	-1.09413
QPCTL	glutaminyl-peptide cyclotransferase like	0.40275	1.06262	0.242707	1.03946	0.0581157	1.44015
PPP5C	protein phosphatase 5 catalytic subunit	0.181736	-0.207268	0.00568942	-0.371934	0.00181373	-0.373892
CEP68	centrosomal protein 68	0.853833	-0.097066	0.841494	0.0365259	0.719	-0.124555
MAP4K3	mitogen-activated protein kinase kinase kinase kinase 3	0.184736	0.346425	0.00699104	0.457653	0.232494	0.241596
ZBTB32	zinc finger and BTB domain containing 32	nan	0	nan	-inf	nan	-inf
TYROBP	TYRO protein tyrosine kinase binding protein	nan	-inf	nan	-0.295456	nan	0.127756
TMEM159	transmembrane protein 159	0.372008	-0.207835	0.258748	-0.253313	0.273226	0.187744
GABRA3	gamma-aminobutyric acid type A receptor alpha3 subunit	nan	-1.68676	0.387836	-0.960562	0.3013	-1.07523
BRCA1	BRCA1, DNA repair associated	0.740019	0.180715	0.921445	-0.00916119	0.353952	-0.301296
ERCC1	ERCC excision repair 1, endonuclease non-catalytic subunit	0.951691	0.0340698	0.389154	0.0813619	0.59675	0.0653559
CD22	CD22 molecule	nan	inf	nan	-inf	nan	inf
SEMA3B	semaphorin 3B	0.249518	0.433683	7.86304e-17	1.61006	7.05112e-05	0.882643
MBTPS2	membrane bound transcription factor peptidase, site 2	0.92488	-0.0251437	0.0364209	0.233161	0.000902116	-0.453676
PRICKLE3	prickle planar cell polarity protein 3	nan	inf	nan	-inf	nan	inf
LTF	lactotransferrin	nan	-inf	nan	-inf	nan	0.127756
EXTL3	exostosin like glycosyltransferase 3	0.777993	-0.0660032	0.953542	-0.0272892	9.71086e-15	0.756865
NR1H4	nuclear receptor subfamily 1 group H member 4	nan	-inf	nan	inf	nan	-inf
ELOVL5	ELOVL fatty acid elongase 5	2.80075e-05	0.370239	0.00608243	-0.277212	1.08563e-12	0.532374
ALOX5	arachidonate 5-lipoxygenase	nan	-inf	nan	inf	nan	inf
KDM5D	lysine demethylase 5D	nan	-inf	nan	-inf	nan	-inf
CALCOCO1	calcium binding and coiled-coil domain 1	0.802751	-0.1074	0.0701578	0.338311	0.000115802	0.671686
UBR7	ubiquitin protein ligase E3 component n-recognin 7 (putative)	0.099481	-0.291493	0.00521268	-0.452997	0.0313324	-0.324841
MAP4K5	mitogen-activated protein kinase kinase kinase kinase 5	0.969117	0.0252445	0.884781	-0.0838708	0.0304257	-0.392713
EHD3	EH domain containing 3	0.825917	-0.0452492	0.401382	-0.15262	4.49159e-69	-1.83534
PSMC4	proteasome 26S subunit, ATPase 4	0.998798	0.00607733	0.153314	-0.168851	5.38155e-06	-0.337151
MAN2B2	mannosidase alpha class 2B member 2	0.261397	-0.333428	1.11301e-05	0.722257	0.00123566	-0.704566
SLC7A14	solute carrier family 7 member 14	0.00553219	-0.75825	0.0435027	-0.567494	0.0126703	0.539848
CLDN11	claudin 11	0.438938	-0.352949	0.376955	0.250917	0.136218	0.422938
SLC25A39	solute carrier family 25 member 39	0.0853216	-0.170652	0.00680123	0.165389	0.463127	0.0583497
MVP	major vault protein	0.989918	0.0152381	1.67535e-22	0.987545	3.28257e-06	-0.636674
NUB1	negative regulator of ubiquitin like proteins 1	0.782095	-0.0515323	0.470389	0.0541154	0.00246525	0.293296
PGM3	phosphoglucomutase 3	0.700423	-0.105382	0.567066	0.0694614	1.39336e-11	0.795855
RWDD2A	RWD domain containing 2A	0.992657	-0.0156884	0.440619	0.156979	0.239477	0.266069
CLK1	CDC like kinase 1	0.493722	0.16734	0.0380692	-0.356955	0.0227838	0.288681
POLR3B	RNA polymerase III subunit B	0.867089	-0.135177	0.264389	-0.514213	0.1245	-0.594955
ANGEL1	angel homolog 1	0.529729	0.349604	0.194637	0.41316	0.0745724	0.539048
RNF14	ring finger protein 14	0.355037	0.202353	0.861752	-0.0132847	8.97203e-07	-0.717946
DNASE1L1	deoxyribonuclease 1 like 1	0.831297	-0.0880241	6.0612e-17	1.15598	1.01638e-05	-0.877896
DDX11	DEAD/H-box helicase 11	0.878053	0.0991332	0.955368	-0.0834931	0.232154	0.275276
HEBP1	heme binding protein 1	0.858656	-0.0575643	0.0512871	0.223536	2.49621e-05	0.520552
GPRC5A	G protein-coupled receptor class C group 5 member A	0.0591953	0.592037	0.0199307	0.549647	0.25699	0.322745
MAMLD1	mastermind like domain containing 1	nan	-0.249978	0.81343	-0.66177	0.823592	0.323567
CD6	CD6 molecule	0.302461	-1.05813	0.153168	-1.14284	0.167041	-1.04101
TACC3	transforming acidic coiled-coil containing protein 3	0.883375	0.0589336	0.000390911	-0.50685	1.61604e-07	0.6028
UFL1	UFM1 specific ligase 1	0.81633	-0.11339	0.944759	0.00474595	0.000197224	0.745526
POLA2	DNA polymerase alpha 2, accessory subunit	0.180392	-0.389513	0.006063	-0.637408	1.05048e-06	-1.0733
ZC3H3	zinc finger CCCH-type containing 3	0.957012	0.052339	0.865206	-0.117113	0.163899	0.353239
CAPN1	calpain 1	5.22884e-06	0.455504	0.00156332	0.268703	2.00696e-19	-0.96396
ACPP	acid phosphatase, prostate	0.685118	0.613371	0.602759	0.474259	0.683582	-0.582915
MDH1	malate dehydrogenase 1	0.852027	-0.0284921	0.0032035	-0.284888	0.0521559	-0.162689
SLC30A9	solute carrier family 30 member 9	0.903885	-0.0234347	0.0250505	-0.302257	0.8831	0.016978
MTMR11	myotubularin related protein 11	0.363396	1.11864	0.548832	0.650533	0.0541431	1.46625
COX15	COX15, cytochrome c oxidase assembly homolog	0.95595	-0.0232163	0.473883	0.0926467	0.0149823	0.344496
CCDC88C	coiled-coil domain containing 88C	0.401036	-0.182082	0.0142337	-0.404662	4.92819e-06	0.539812
YAF2	YY1 associated factor 2	0.627682	0.15953	0.000268176	0.47353	0.0277126	-0.375509
ZMYND11	zinc finger MYND-type containing 11	0.158211	0.361903	0.0343588	0.358703	0.284583	-0.251243
WAS	Wiskott-Aldrich syndrome	0.962685	-0.09015	0.92818	0.0708125	0.000222907	1.83045
DPEP1	dipeptidase 1 (renal)	nan	-inf	nan	-inf	nan	-inf
BID	BH3 interacting domain death agonist	0.432077	-0.143376	0.000502561	-0.445675	0.456663	0.0891196
NPC1L1	NPC1 like intracellular cholesterol transporter 1	nan	inf	nan	inf	nan	inf
XYLT2	xylosyltransferase 2	0.054477	-0.372384	0.90033	-0.0573454	0.0644869	-0.322772
RGPD5	RANBP2-like and GRIP domain containing 5	0.460035	-0.455883	0.620256	-0.283793	0.529191	-0.304269
STMN4	stathmin 4	0.263407	0.260283	0.154919	0.200326	3.7132e-05	-0.712657
NUDCD3	NudC domain containing 3	0.65849	0.0893585	0.413238	-0.150102	0.00203614	-0.304763
ISL1	ISL LIM homeobox 1	0.0203548	0.267842	0.00983028	-0.292824	0.682442	0.0440663
CHDH	choline dehydrogenase	0.97977	-0.0399469	0.415619	-0.559123	0.759878	-0.23617
IL20RA	interleukin 20 receptor subunit alpha	1.597e-05	0.981163	0.651373	0.120443	0.757109	-0.124783
CLCA1	chloride channel accessory 1	nan	-inf	nan	-inf	nan	inf
GLT8D1	glycosyltransferase 8 domain containing 1	0.95595	0.0254569	0.51252	0.0604632	0.103336	0.215953
ATP2C1	ATPase secretory pathway Ca2+ transporting 1	0.42871	-0.124182	0.0946205	-0.228174	0.996789	-0.0140475
IGF1	insulin like growth factor 1	nan	-inf	nan	-inf	nan	-inf
SLC38A5	solute carrier family 38 member 5	nan	-inf	nan	0.720846	nan	0.115477
RALBP1	ralA binding protein 1	0.523369	0.168124	0.294592	0.144111	0.0910268	0.251296
RUFY3	RUN and FYVE domain containing 3	0.430412	-0.133795	3.52829e-09	-0.658108	3.16352e-06	-0.505145
CNTN1	contactin 1	8.82695e-06	0.370953	0.00183322	0.212554	0.0015716	0.245793
SLC11A1	solute carrier family 11 member 1	0.974866	-0.00729249	0.688669	0.506062	0.437689	0.829014
WWTR1	WW domain containing transcription regulator 1	0.729864	0.112544	0.218955	0.146325	0.0265121	-0.339746
AGPS	alkylglycerone phosphate synthase	0.343066	-0.149667	0.0222261	-0.310068	3.41786e-07	-0.550498
CXorf56	chromosome X open reading frame 56	0.777052	-0.10162	0.98675	-0.0710766	0.759273	0.0530819
ATP1A2	ATPase Na+/K+ transporting subunit alpha 2	nan	-inf	nan	-inf	nan	inf
TTC27	tetratricopeptide repeat domain 27	0.990772	0.0148722	0.0931456	0.466799	0.349376	0.303657
ZNF582	zinc finger protein 582	0.997344	0.0170287	0.760065	0.137417	5.20713e-06	1.38632
VSIG2	V-set and immunoglobulin domain containing 2	nan	-0.272834	nan	-1.28901	0.932491	-0.144624
PHLDB1	pleckstrin homology like domain family B member 1	0.864865	-0.0437652	0.000345907	0.341956	0.127187	-0.214688
CYP24A1	cytochrome P450 family 24 subfamily A member 1	nan	-inf	nan	-inf	nan	inf
PRDM11	PR/SET domain 11	0.962685	0.0552239	0.167499	0.430006	0.00440047	-1.07309
SYT13	synaptotagmin 13	3.72253e-06	-0.858567	3.46899e-14	-1.39189	0.333933	-0.20491
SNAI2	snail family transcriptional repressor 2	0.394654	0.403217	0.502182	-0.326723	0.277569	0.349401
CD74	CD74 molecule	nan	-1.59686	0.860767	0.247148	0.439943	0.85522
HGF	hepatocyte growth factor	0.908416	-0.0402089	1.25126e-30	1.28081	2.20905e-07	-0.800142
ZRANB1	zinc finger RANBP2-type containing 1	nan	-0.54877	0.993573	-0.114367	0.716602	-0.422833
NCDN	neurochondrin	0.777993	-0.120298	0.140835	0.250461	9.92022e-06	-0.898392
ADGRA2	adhesion G protein-coupled receptor A2	0.584358	0.623951	0.647086	0.347543	0.469979	0.494722
ZFP64	ZFP64 zinc finger protein	0.945652	0.065331	0.774403	-0.133519	0.857547	0.055295
MNAT1	MNAT1, CDK activating kinase assembly factor	0.769893	0.132199	0.691902	-0.14357	0.726419	-0.0961096
SAMD4A	sterile alpha motif domain containing 4A	0.0120017	-0.910873	0.363724	-0.376241	0.025473	-0.724213
RUNX3	runt related transcription factor 3	0.448638	0.993318	0.703766	-0.603751	0.000370164	2.18847
MRE11	MRE11 homolog, double strand break repair nuclease	0.71317	-0.157996	0.951442	-0.0667642	0.520629	0.152108
PLEKHB1	pleckstrin homology domain containing B1	0.14852	0.467859	0.11029	0.381745	0.371716	0.241671
SERPINB1	serpin family B member 1	0.0352021	0.524702	0.000256424	0.6533	0.009887	-0.643032
SLC7A9	solute carrier family 7 member 9	nan	1	nan	0.720846	nan	1.11548
SPAST	spastin	0.288601	-0.264964	0.0221909	-0.4619	0.565271	-0.139647
NRXN3	neurexin 3	0.157864	-0.95923	0.00557226	-1.49761	0.605299	-0.314481
OSBPL5	oxysterol binding protein like 5	0.786254	0.179038	0.651826	0.133484	0.713812	0.13791
AQR	aquarius intron-binding spliceosomal factor	0.888736	0.0748849	0.744787	0.0264804	0.698824	0.0715217
CPS1	carbamoyl-phosphate synthase 1	0.937121	-0.0552086	0.0586525	0.692614	0.269143	-0.51531
FHL1	four and a half LIM domains 1	0.962685	0.0221954	0.0814165	0.123523	0.933102	-0.018673
RTFDC1	replication termination factor 2 domain containing 1	0.81887	0.0617179	0.405827	0.0559945	0.000349154	0.318776
GABRA1	gamma-aminobutyric acid type A receptor alpha1 subunit	nan	-inf	nan	-0.295456	nan	0.127756
NLRP2	NLR family pyrin domain containing 2	nan	inf	nan	inf	nan	inf
SLC45A4	solute carrier family 45 member 4	0.201491	-0.52291	0.714094	0.103675	0.926385	-0.0483277
RNF10	ring finger protein 10	0.966331	0.0261358	0.725473	0.0131423	0.881234	-0.0331227
ZNF839	zinc finger protein 839	0.835949	-0.114677	0.835259	0.0457218	0.36857	-0.269485
ZDHHC6	zinc finger DHHC-type containing 6	0.168986	-0.310193	0.254657	-0.268787	0.098763	-0.313448
GRAMD1B	GRAM domain containing 1B	0.91579	0.110092	0.744849	0.0998173	0.992063	-0.0308785
RNH1	ribonuclease/angiogenin inhibitor 1	0.816178	-0.0602526	7.58211e-07	0.421098	0.758878	-0.0657273
NDUFS1	NADH:ubiquinone oxidoreductase core subunit S1	0.553993	-0.124164	0.993573	-0.0385505	0.000161353	-0.459666
RB1CC1	RB1 inducible coiled-coil 1	0.739151	0.125434	0.215683	0.194382	0.00998571	0.384708
ERP44	endoplasmic reticulum protein 44	0.951691	-0.0172298	0.453057	0.0669639	0.000147278	0.396083
ALAS1	5'-aminolevulinate synthase 1	0.911972	0.0487592	0.392094	-0.196557	0.628688	0.0727132
BIRC3	baculoviral IAP repeat containing 3	0.867836	0.221079	1.77444e-05	1.65229	0.000499323	1.44887
AKAP11	A-kinase anchoring protein 11	0.750966	-0.14287	0.997075	-0.0352578	0.993241	-0.00979628
GLRX2	glutaredoxin 2	0.000333709	-0.530751	4.50322e-05	-0.608472	0.000479778	-0.4983
SNAPC1	small nuclear RNA activating complex polypeptide 1	0.92078	-0.0282419	0.000855809	-0.449777	1.07448e-32	1.16476
DERA	deoxyribose-phosphate aldolase	0.737012	0.119293	0.377722	0.128338	0.284583	-0.204009
STRAP	serine/threonine kinase receptor associated protein	0.152943	-0.154412	5.02852e-05	-0.368582	0.146035	-0.142843
ABCC2	ATP binding cassette subfamily C member 2	nan	-1.00666	nan	-2.30212	nan	-inf
DEF6	DEF6, guanine nucleotide exchange factor	0.60425	-0.652077	0.899679	0.0727738	0.000138266	1.68319
PLEKHO1	pleckstrin homology domain containing O1	0.797886	0.0664597	0.15809	-0.207489	8.83363e-21	-0.89742
GCLM	glutamate-cysteine ligase modifier subunit	0.407507	0.209937	0.344246	-0.236935	0.0815955	-0.322761
UBR2	ubiquitin protein ligase E3 component n-recognin 2	0.588616	0.256328	0.0184371	0.531313	0.0269019	0.522666
EHD2	EH domain containing 2	5.04532e-15	0.879959	9.63639e-71	1.72242	4.20841e-16	-1.19921
DEPDC1	DEP domain containing 1	0.89074	0.0623251	8.8259e-09	-0.990603	2.17419e-07	0.724545
CCDC28A	coiled-coil domain containing 28A	0.0713625	0.486121	0.000667393	0.646214	4.24844e-16	1.41141
RRAGD	Ras related GTP binding D	0.993893	0.00742881	0.289904	-0.243661	0.600037	0.0915848
HSF2	heat shock transcription factor 2	0.756212	-0.0992518	0.831216	-0.095766	0.000588222	0.474523
PHF20	PHD finger protein 20	0.545028	0.146908	0.0910274	0.186658	0.00681873	0.310678
HSD17B6	hydroxysteroid 17-beta dehydrogenase 6	0.545582	0.400608	0.422732	0.333643	0.0117601	0.858931
NR1H3	nuclear receptor subfamily 1 group H member 3	0.393921	0.491322	0.880305	-0.164823	0.00894433	0.902842
TYMP	thymidine phosphorylase	0.813765	0.14274	0.000418594	0.793468	0.433845	-0.30187
NCAPH2	non-SMC condensin II complex subunit H2	0.135168	0.343479	0.64693	0.074634	0.781602	0.0629427
TOMM34	translocase of outer mitochondrial membrane 34	0.574357	-0.130947	0.42991	0.0753746	0.976259	-0.0213981
SEC63	SEC63 homolog, protein translocation regulator	0.757654	-0.0649577	0.808476	-0.0920968	0.206734	0.132624
KPNA6	karyopherin subunit alpha 6	0.700297	0.0891366	0.00191819	0.283654	0.323087	-0.141414
VIM	vimentin	0.27625	0.107851	7.4991e-18	0.416301	8.55556e-12	-0.385235
RTEL1-TNFRSF6B	RTEL1-TNFRSF6B readthrough (NMD candidate)	0.729864	-0.194585	0.696528	0.0776624	0.553454	-0.215812
FAS	Fas cell surface death receptor	0.991155	-0.00829402	0.0208312	1.06732	0.412039	-0.653653
RNASET2	ribonuclease T2	0.0395053	-0.30785	5.22595e-18	0.829087	0.583672	0.0723747
CD44	CD44 molecule (Indian blood group)	0.950171	-0.0423841	0.558448	0.14996	0.0159255	-0.656938
KCNG1	potassium voltage-gated channel modifier subfamily G member 1	0.244208	-0.269309	0.0328982	-0.412243	0.000167224	-0.642264
AGPAT4	1-acylglycerol-3-phosphate O-acyltransferase 4	0.565266	-0.14253	2.12966e-07	-0.768954	0.266508	0.154721
BTN3A1	butyrophilin subfamily 3 member A1	0.969137	0.0417856	5.16546e-05	0.701319	0.0161861	0.476303
MIPEP	mitochondrial intermediate peptidase	0.967197	-0.0561292	0.306055	0.399995	0.530513	-0.354292
PRKCH	protein kinase C eta	0.0564465	0.297837	0.233514	-0.23081	2.23781e-18	-1.14498
INSRR	insulin receptor related receptor	0.927876	0.112175	0.226148	0.440593	0.59824	-0.263266
IFNGR1	interferon gamma receptor 1	0.688047	0.107037	0.140492	-0.242629	6.31397e-12	0.709306
B4GALT7	beta-1,4-galactosyltransferase 7	0.173506	-0.380802	0.999287	-0.0418634	0.0115644	-0.555086
SH2D2A	SH2 domain containing 2A	nan	-inf	nan	inf	nan	inf
TNFRSF1B	TNF receptor superfamily member 1B	0.580139	-0.709562	0.965183	-0.0778887	0.543398	0.416318
VEZT	vezatin, adherens junctions transmembrane protein	0.264901	0.190657	0.650191	0.0346716	0.000215891	-0.437783
POU2F2	POU class 2 homeobox 2	0.00146427	0.735168	0.0325277	0.434999	2.24767e-05	-1.11074
BRD9	bromodomain containing 9	0.92623	0.0510951	0.642719	-0.153752	0.2436	-0.219372
SNX1	sorting nexin 1	0.362219	0.146356	0.553852	0.0283865	0.416799	-0.109115
TBPL1	TATA-box binding protein like 1	0.367557	-0.150397	0.000246603	-0.457019	0.0424352	0.222291
ARNTL2	aryl hydrocarbon receptor nuclear translocator like 2	0.640416	0.212875	0.296849	0.232808	0.199122	-0.349463
BCLAF1	BCL2 associated transcription factor 1	0.0214823	-0.312995	0.0333979	-0.317244	6.07611e-20	-1.11692
SLC39A9	solute carrier family 39 member 9	0.193352	-0.174356	0.760405	0.0042537	0.106845	0.156694
ANK1	ankyrin 1	0.892143	0.214278	0.23333	-1.06242	0.94881	-0.0752286
TFB1M	transcription factor B1, mitochondrial	0.334774	0.438233	0.970748	-0.0375847	0.005781	0.748312
RABEP1	rabaptin, RAB GTPase binding effector protein 1	0.501321	0.154387	0.551799	-0.152892	0.314863	-0.161904
HMGB3	high mobility group box 3	0.856642	-0.0487918	3.74215e-08	-0.66287	0.00679929	-0.335136
NUP160	nucleoporin 160	0.987339	0.00199379	0.967506	-0.0278672	0.959258	-0.000807793
BAK1	BCL2 antagonist/killer 1	0.0490255	0.537878	0.000478658	0.675576	0.529795	-0.198262
MUSK	muscle associated receptor tyrosine kinase	nan	-inf	nan	inf	nan	inf
IKZF2	IKAROS family zinc finger 2	0.892316	0.254573	0.579995	0.481425	0.266373	0.748905
GRN	granulin precursor	0.839574	-0.0245992	3.62438e-35	0.674541	0.118469	-0.133252
FAM13B	family with sequence similarity 13 member B	0.924137	0.0336368	0.00204387	0.379095	1.9222e-12	-1.12626
ARHGAP31	Rho GTPase activating protein 31	0.141041	-0.234949	0.270102	-0.205102	0.00190525	-0.395563
CENPQ	centromere protein Q	0.475406	0.399089	0.989978	-0.0393513	0.000236851	1.06126
SARS	seryl-tRNA synthetase	0.935133	-0.0119443	0.00979734	-0.282214	0.0423044	-0.201471
RANBP3	RAN binding protein 3	0.972193	0.0242206	0.5964	0.0558948	0.422795	-0.153133
ARID4A	AT-rich interaction domain 4A	0.489724	0.283201	0.142021	0.345677	0.597644	-0.176503
TSSC1	tumor suppressing subtransferable candidate 1	0.563723	0.137262	0.361443	-0.194115	0.716606	0.0433031
PNPLA6	patatin like phospholipase domain containing 6	0.540905	0.153493	0.00183909	0.355168	0.712225	-0.0806565
IFT88	intraflagellar transport 88	0.714649	0.194219	0.645881	0.111146	0.744924	-0.118644
ALG1	ALG1, chitobiosyldiphosphodolichol beta-mannosyltransferase	0.918338	-0.0601897	0.750893	0.0523376	0.0878501	-0.435505
ZCCHC8	zinc finger CCHC-type containing 8	0.985336	-0.00834382	0.598386	-0.215368	0.0799991	-0.443482
ABCF2	ATP binding cassette subfamily F member 2	0.258405	-0.186733	0.690536	0.022613	0.227682	-0.176386
CHPF2	chondroitin polymerizing factor 2	0.503764	-0.124362	0.279905	0.117175	0.146223	-0.197489
LRRC7	leucine rich repeat containing 7	nan	-0.425433	0.891279	0.12941	0.968745	-0.00890555
FUT8	fucosyltransferase 8	0.373911	-0.214446	0.00139526	-0.571964	0.930817	-0.0237642
UBA6	ubiquitin like modifier activating enzyme 6	0.694649	-0.114113	0.98776	-0.0298151	0.836807	-0.0547128
GAB2	GRB2 associated binding protein 2	0.00334841	0.29616	9.14865e-05	0.289432	1.13819e-13	0.583261
ATP6V0A1	ATPase H+ transporting V0 subunit a1	0.383296	0.172393	0.212611	-0.236294	0.0419445	-0.299116
PIAS1	protein inhibitor of activated STAT 1	0.532008	-0.162211	0.158731	-0.29576	0.0103192	0.370777
SLC4A7	solute carrier family 4 member 7	0.927027	-0.05117	0.566534	-0.186925	7.54933e-12	1.06592
APBA2	amyloid beta precursor protein binding family A member 2	0.890748	0.0462599	0.0658074	-0.282223	8.20451e-05	-0.488668
MAP2K3	mitogen-activated protein kinase kinase 3	0.756212	0.130767	0.00268778	0.481852	0.00123561	-0.689001
EFCAB1	EF-hand calcium binding domain 1	nan	inf	1	-inf	5.63896e-07	inf
TMSB10	thymosin beta 10	0.885839	-0.0251647	2.64966e-08	-0.409375	1.10828e-08	-0.365003
ASTE1	asteroid homolog 1 (Drosophila)	0.948282	-0.0742728	0.980847	-0.0281158	0.765282	-0.167689
RNF19A	ring finger protein 19A, RBR E3 ubiquitin protein ligase	0.922024	-0.0473136	0.57615	-0.215205	0.810616	-0.089537
PEX3	peroxisomal biogenesis factor 3	0.295147	0.470446	0.774712	0.091975	0.899369	0.0380488
GABARAPL2	GABA type A receptor associated protein like 2	0.375239	-0.0969255	0.0034041	-0.267252	0.854447	0.00540849
SH3YL1	SH3 and SYLF domain containing 1	0.345397	0.357613	0.628015	0.118913	0.00298607	0.672629
FAM136A	family with sequence similarity 136 member A	0.991605	-0.00129008	0.95166	-0.0385508	0.45945	-0.133949
VCL	vinculin	0.843547	0.060584	0.541514	0.0509209	0.29902	0.123409
DEPDC1B	DEP domain containing 1B	0.518735	0.234845	0.280095	-0.326409	0.0259944	0.440369
DAPK2	death associated protein kinase 2	0.253698	0.898797	0.515338	0.452854	0.949688	0.055558
NSMAF	neutral sphingomyelinase activation associated factor	0.419112	0.373058	0.0718656	0.500734	0.0904944	-0.568152
ADSS	adenylosuccinate synthase	0.548507	-0.199458	0.906481	-0.0811161	0.0361296	-0.422569
STAP1	signal transducing adaptor family member 1	nan	inf	nan	-inf	nan	inf
TIMP2	TIMP metallopeptidase inhibitor 2	0.00119273	-0.174332	3.39773e-12	0.272558	0.000112796	-0.206824
RFC1	replication factor C subunit 1	0.848926	-0.0652717	0.85674	0.00611708	0.0103848	0.378293
TBC1D23	TBC1 domain family member 23	0.814385	0.119331	0.84899	0.0208993	2.35297e-08	0.891128
CUL3	cullin 3	0.849431	-0.10188	0.537072	-0.232169	0.786614	0.0631958
MYOM2	myomesin 2	nan	-0.00891472	0.82657	-0.452045	0.459376	0.755217
OTC	ornithine carbamoyltransferase	nan	1.57603	nan	1.30039	nan	1.11548
CYP46A1	cytochrome P450 family 46 subfamily A member 1	nan	1.1273	0.0940634	1.78513	0.531559	0.962245
ZZZ3	zinc finger ZZ-type containing 3	0.638713	0.184918	0.187096	0.268487	0.673478	0.107385
SLC18A1	solute carrier family 18 member A1	0.0397028	-0.327016	4.88649e-17	-1.10334	1.26655e-53	-2.4919
USP2	ubiquitin specific peptidase 2	0.488215	-0.244113	0.98612	-0.0230429	0.000106247	0.702038
CASR	calcium sensing receptor	nan	0	nan	-0.295456	nan	-inf
TUBG2	tubulin gamma 2	0.710142	-0.167258	0.99793	-0.055335	0.0493691	0.362171
RPL26L1	ribosomal protein L26 like 1	0.992585	0.000451074	0.149616	-0.241058	0.921703	0.000837596
FLT4	fms related tyrosine kinase 4	nan	-inf	nan	-inf	nan	0.859822
NSUN2	NOP2/Sun RNA methyltransferase family member 2	0.954909	0.0403191	0.630688	-0.136932	0.41498	-0.15789
FBXO42	F-box protein 42	0.314485	0.289174	0.611792	0.0833886	0.296505	-0.251122
MFAP3	microfibrillar associated protein 3	0.837387	-0.194665	0.268957	-0.600796	0.319547	-0.500853
MRI1	methylthioribose-1-phosphate isomerase 1	0.999441	-0.00850433	0.921316	-0.158613	0.333608	-0.882567
METTL1	methyltransferase like 1	0.555873	-0.313775	0.983584	-0.043032	0.0414217	0.554852
HOXC8	homeobox C8	0.7681	0.283563	0.872916	-0.164823	0.570444	-0.314481
AGA	aspartylglucosaminidase	0.475489	-0.203207	0.000208349	0.523328	1.88375e-05	-0.773763
PI4K2B	phosphatidylinositol 4-kinase type 2 beta	0.914894	0.129486	0.732753	0.148846	0.758656	-0.174986
BOD1L1	biorientation of chromosomes in cell division 1 like 1	0.706451	0.187903	0.0845672	0.429503	0.0781082	0.429554
MAT2B	methionine adenosyltransferase 2B	0.915497	0.0418042	0.662145	-0.108806	0.284791	-0.151751
TLL1	tolloid like 1	nan	1	nan	-inf	nan	-inf
EDC4	enhancer of mRNA decapping 4	nan	0.16064	0.134516	1.36072	0.561365	0.703256
TRIO	trio Rho guanine nucleotide exchange factor	0.96482	0.0257511	0.188693	0.110225	2.3745e-18	-0.87695
VCAN	versican	3.49925e-09	-0.685792	1.08732e-17	-1.00705	3.79182e-30	-1.39557
CLEC16A	C-type lectin domain containing 16A	0.999441	0.0116738	0.0873082	0.309811	0.0117163	0.470705
CDH1	cadherin 1	nan	0.822091	0.921601	0.132918	0.175595	1.19505
SKIV2L2	Ski2 like RNA helicase 2	0.880754	-0.0927057	0.966	-0.0780866	0.949681	-0.0386706
DNAH5	dynein axonemal heavy chain 5	nan	0	nan	0.720846	nan	1.70454
ZFYVE16	zinc finger FYVE-type containing 16	0.67093	0.13682	0.962502	-0.0313509	0.385847	-0.176131
RIPOR1	RHO family interacting cell polarization regulator 1	0.962685	0.0213818	0.182214	0.125721	0.0142243	-0.310407
C6	complement C6	0.893586	0.312129	0.0126127	1.68499	0.840592	0.231243
RAI14	retinoic acid induced 14	0.454811	-0.258631	0.102036	0.317795	0.0353538	-0.493752
SOX30	SRY-box 30	nan	0	nan	-inf	0.00263047	3.92811
PNKP	polynucleotide kinase 3'-phosphatase	0.722327	0.110169	0.85319	-0.0871868	6.24762e-07	0.590652
BEST2	bestrophin 2	nan	inf	nan	inf	nan	-inf
PHLPP2	PH domain and leucine rich repeat protein phosphatase 2	0.692803	0.319115	0.674779	0.182737	0.666392	0.193796
SPDL1	spindle apparatus coiled-coil protein 1	0.67117	0.148097	0.818436	-0.127656	0.805963	0.0412261
STAU2	staufen double-stranded RNA binding protein 2	0.353235	-0.179186	0.013892	0.272817	0.822526	0.0289397
PQLC2	PQ loop repeat containing 2	0.197266	0.419395	0.291594	0.246524	0.332158	-0.289489
CTNS	cystinosin, lysosomal cystine transporter	0.935305	0.0537897	0.182554	0.315882	0.4677	-0.253479
RTN4R	reticulon 4 receptor	0.00171518	0.9663	0.995857	-0.0520543	0.560382	0.214135
PHF23	PHD finger protein 23	0.835434	0.0623359	0.842387	-0.0108631	9.2608e-16	-0.878729
CDH10	cadherin 10	nan	inf	nan	-inf	nan	-inf
INPP4A	inositol polyphosphate-4-phosphatase type I A	0.725302	0.131234	0.453045	0.109351	0.686913	0.0821793
RAB27B	RAB27B, member RAS oncogene family	0.535475	0.302501	0.0814745	-0.581042	0.723163	-0.139137
PSMA4	proteasome subunit alpha 4	0.477427	-0.0843209	4.08563e-08	-0.451813	3.81341e-10	-0.462651
MYO16	myosin XVI	0.0307176	0.860603	0.632718	-0.28381	0.470763	0.293924
LSG1	large 60S subunit nuclear export GTPase 1	0.81887	-0.103233	0.946421	-0.0193569	0.704475	0.0728062
PARP3	poly(ADP-ribose) polymerase family member 3	0.932385	0.0837863	0.018264	0.696929	0.202502	-0.54587
TNC	tenascin C	1.93301e-05	-1.6645	0.76484	0.103085	4.93079e-05	-1.49602
THAP3	THAP domain containing 3	0.263602	-0.200624	0.269144	-0.221492	0.0697296	-0.25666
RIPOR3	RIPOR family member 3	0.308691	1.11864	0.704818	0.42711	0.726597	0.358793
TDP1	tyrosyl-DNA phosphodiesterase 1	0.896817	-0.0668932	0.0510718	-0.508845	0.00513293	0.569276
AIFM2	apoptosis inducing factor, mitochondria associated 2	0.851032	-0.0916327	0.969881	-0.0722056	0.0970557	-0.431675
SPATA7	spermatogenesis associated 7	0.929968	-0.0633834	0.51845	0.19361	0.0171906	0.642172
MED17	mediator complex subunit 17	0.681273	0.254688	0.891219	-0.112558	0.416336	-0.323472
RETSAT	retinol saturase	0.595655	0.124992	0.909887	-0.0303363	2.4457e-09	-0.716141
CAPG	capping actin protein, gelsolin like	0.687132	0.703607	0.0199957	1.57929	0.00265749	1.90673
AP2S1	adaptor related protein complex 2 sigma 1 subunit	0.000549269	-0.221098	0.0469322	-0.188049	1.08907e-06	-0.299898
USH2A	usherin	nan	-0.369357	0.745515	0.453765	0.499081	0.755217
TG	thyroglobulin	nan	1.57603	nan	1.30039	nan	0.127756
ADAM28	ADAM metallopeptidase domain 28	nan	-inf	nan	-inf	nan	-inf
BARX2	BARX homeobox 2	nan	-inf	nan	-inf	nan	inf
DCUN1D1	defective in cullin neddylation 1 domain containing 1	0.388771	-0.200474	0.0911668	-0.327347	0.00240941	-0.478659
JADE2	jade family PHD finger 2	0.95719	0.0369528	1.27108e-15	1.21537	0.548885	0.136512
ZIC2	Zic family member 2	0.932385	0.0956287	8.92858e-19	-5.02436	3.36598e-16	-4.62358
LCP2	lymphocyte cytosolic protein 2	nan	-2.17289	nan	-inf	nan	-2.05741
TRIT1	tRNA isopentenyltransferase 1	0.735151	0.173781	0.809302	-0.12444	0.68408	0.10864
ADRB1	adrenoceptor beta 1	nan	0.576029	nan	-inf	nan	0.704544
CUL7	cullin 7	0.218896	0.242883	1.29791e-05	0.509892	2.35641e-11	0.792657
CTNNA1	catenin alpha 1	0.939429	0.0280692	0.431472	-0.114562	0.193943	-0.121345
PHKA2	phosphorylase kinase regulatory subunit alpha 2	0.892316	-0.10127	0.759429	0.118056	0.989049	-0.0179576
CNTLN	centlein	0.949879	0.0578774	0.527064	0.141127	0.933123	0.0188931
EPHA3	EPH receptor A3	nan	-inf	nan	-inf	nan	-inf
HSPA5	heat shock protein family A (Hsp70) member 5	0.0464072	-0.123475	1.16236e-51	-0.780693	6.08066e-89	-1.02032
DSG2	desmoglein 2	nan	-0.272834	0.815577	-0.54988	0.00881605	2.17534
GEMIN8	gem nuclear organelle associated protein 8	0.641248	-0.166978	0.643518	0.0656624	3.8001e-11	0.999676
OFD1	OFD1, centriole and centriolar satellite protein	0.991605	-0.00180179	0.392094	0.183704	0.63668	0.117083
GPM6B	glycoprotein M6B	0.960689	-0.0111426	0.000502596	-0.572203	9.30579e-10	-0.96352
MAGEC2	MAGE family member C2	0.0134874	1.1475	6.2063e-11	2.0943	0.35429	-0.620025
WDR37	WD repeat domain 37	0.484849	0.297442	0.967161	-0.0616258	0.711281	-0.134103
YTHDC2	YTH domain containing 2	0.773772	0.16743	0.688096	0.120586	0.523641	-0.246981
CTPS2	CTP synthase 2	0.905551	0.0688357	0.989978	-0.0538424	0.0136338	-0.542962
ATP6V1H	ATPase H+ transporting V1 subunit H	0.978019	0.0245968	0.059275	0.20869	5.12081e-13	-0.958042
POLR2B	RNA polymerase II subunit B	0.833563	-0.156517	0.125946	0.459326	0.0418727	0.593627
FAM214A	family with sequence similarity 214 member A	0.567851	0.220634	0.587487	0.117924	0.210291	-0.313392
TPR	translocated promoter region, nuclear basket protein	0.258418	0.351892	2.48246e-05	0.763562	0.59954	0.124431
CP	ceruloplasmin	0.760742	0.163174	0.742972	0.0729451	0.822155	-0.0569299
KIAA0556	KIAA0556	0.956767	0.0638184	0.191003	0.430414	0.529824	0.240772
DTNBP1	dystrobrevin binding protein 1	0.966383	0.0254416	0.74971	-0.143132	0.814112	0.0349875
XK	X-linked Kx blood group	nan	-1.1465	0.0777305	-1.74222	0.0882827	-1.53496
C12orf4	chromosome 12 open reading frame 4	0.864217	0.139374	0.710949	-0.175941	2.44273e-05	-1.17937
SCML1	sex comb on midleg like 1 (Drosophila)	0.323401	0.317444	0.93594	-0.0104604	0.800724	0.0779215
WWC3	WWC family member 3	0.74288	0.163333	0.734624	0.0708835	0.393298	0.21246
ARHGAP6	Rho GTPase activating protein 6	0.949112	0.0966452	0.778515	-0.284112	0.113177	-0.957323
FAM184B	family with sequence similarity 184 member B	nan	-inf	nan	inf	nan	inf
MAP4	microtubule associated protein 4	0.443696	0.123142	0.196124	0.0894716	0.00173916	0.255023
GOPC	golgi associated PDZ and coiled-coil motif containing	0.13097	0.333486	0.0560494	0.284981	0.0354524	0.337545
USP28	ubiquitin specific peptidase 28	0.787619	0.145381	0.585201	0.122387	0.400797	0.208016
HDAC9	histone deacetylase 9	0.0109117	-0.429931	0.0307857	-0.386781	0.0188484	-0.374648
TSPAN17	tetraspanin 17	0.797088	0.0804922	0.759429	0.00367117	0.113177	-0.21739
NOP16	NOP16 nucleolar protein	0.886828	-0.0569529	0.948011	-0.0962496	0.175582	-0.268363
CC2D2A	coiled-coil and C2 domain containing 2A	0.466152	-0.37419	0.969462	-0.0600756	0.182234	-0.456344
RRM2B	ribonucleotide reductase regulatory TP53 inducible subunit M2B	0.791982	-0.102353	0.504391	0.11172	0.0449081	0.359143
ZNF800	zinc finger protein 800	0.221146	0.409185	0.539487	0.148183	0.273414	0.275936
TNFRSF17	TNF receptor superfamily member 17	nan	-inf	nan	-0.295456	nan	-inf
SNX29	sorting nexin 29	0.577655	0.229013	0.0767786	0.361461	0.704615	-0.128376
LMO3	LIM domain only 3	0.000879679	-1.40459	1.9724e-15	-4.34178	0.00100908	-1.279
MRPS10	mitochondrial ribosomal protein S10	0.811002	-0.0619971	0.821492	-0.0906078	0.448324	0.0986508
COX17	COX17, cytochrome c oxidase copper chaperone	3.32761e-138	-5.93769	1.78055e-154	-5.62798	0.303879	-0.126469
RSF1	remodeling and spacing factor 1	0.974407	0.0121762	0.533931	0.145571	0.0022724	-0.748508
VPS13D	vacuolar protein sorting 13 homolog D	0.892712	0.0428807	0.84782	-0.0714498	0.466639	0.0631162
CELF2	CUGBP Elav-like family member 2	nan	-0.425433	0.456325	-1.06353	0.819873	-0.299902
FAM120A	family with sequence similarity 120A	0.71482	0.137811	0.000618525	0.485919	0.00115377	-0.564353
R3HDM1	R3H domain containing 1	0.847545	-0.0860018	0.466395	-0.224802	0.559036	0.122064
COL9A2	collagen type IX alpha 2 chain	0.0157981	0.925549	0.110964	0.566767	2.28515e-07	1.4894
KITLG	KIT ligand	0.0165641	-0.687805	0.0029617	-0.780188	0.00896937	-0.663929
ERCC8	ERCC excision repair 8, CSA ubiquitin ligase complex subunit	0.839518	0.124673	0.306055	-0.351065	0.463003	-0.223427
ADAMTS6	ADAM metallopeptidase with thrombospondin type 1 motif 6	0.0505653	1.18114	0.941388	0.026414	0.842894	0.11769
H6PD	hexose-6-phosphate dehydrogenase/glucose 1-dehydrogenase	0.992657	0.00390384	1.44081e-08	0.540947	0.594232	0.0652575
VAMP3	vesicle associated membrane protein 3	0.108403	0.257802	4.29643e-15	0.745142	0.694057	0.0545562
PER3	period circadian clock 3	0.0571531	0.971594	0.122754	0.675108	0.000213916	1.37326
UTS2	urotensin 2	nan	inf	nan	inf	nan	inf
TNFRSF9	TNF receptor superfamily member 9	0.645297	-0.413407	0.542491	0.270898	0.395053	0.384814
EPN3	epsin 3	0.862386	-0.425433	0.0929302	1.17436	0.51675	-0.884864
LTBP1	latent transforming growth factor beta binding protein 1	2.34842e-06	-0.732412	0.170061	-0.286826	2.28661e-18	-1.41098
RCN1	reticulocalbin 1	0.43887	0.178222	0.914894	-0.0266066	0.86437	-0.0587285
ELN	elastin	4.41588e-21	-1.24925	9.63447e-58	-2.39946	1.44798e-32	-1.68585
RFC2	replication factor C subunit 2	0.694046	-0.103722	0.0695309	-0.313889	0.0464435	-0.282713
ARID1B	AT-rich interaction domain 1B	0.88652	-0.0513279	0.590386	0.0636827	0.00117187	-0.541951
CLPTM1L	CLPTM1 like	0.873418	0.0492751	0.0495077	0.158999	0.00220484	-0.305638
NEDD4L	neural precursor cell expressed, developmentally down-regulated 4-like, E3 ubiquitin protein ligase	0.902904	0.0474356	0.921601	-0.0835369	0.00047312	0.44434
FOXP3	forkhead box P3	0.963839	0.0675397	0.413979	-0.427334	0.817806	-0.138224
PPP1R3F	protein phosphatase 1 regulatory subunit 3F	0.469864	0.233553	0.872798	-0.00558378	0.110713	0.302053
HEXB	hexosaminidase subunit beta	0.90994	-0.0527157	0.000622666	0.476342	0.190951	0.218268
PTCD2	pentatricopeptide repeat domain 2	0.957254	0.0440021	0.7763	0.063261	0.0504141	0.48909
KIAA2022	KIAA2022	nan	-1.74857	nan	-2.0242	0.937016	0.117732
JKAMP	JNK1/MAPK8-associated membrane protein	0.797345	-0.0537364	0.995159	-0.0446717	0.000167693	-0.431117
DKK3	dickkopf WNT signaling pathway inhibitor 3	0.00275379	-0.269925	3.56889e-06	0.303683	1.78192e-11	-0.549504
NFE2L3	nuclear factor, erythroid 2 like 3	0.661392	-0.167856	0.000887499	0.512149	0.883948	-0.0589912
MCUR1	mitochondrial calcium uniporter regulator 1	0.103085	-0.255134	0.00777559	-0.380886	0.308485	0.127414
LIMA1	LIM domain and actin binding 1	0.219997	0.236616	0.382025	-0.199368	0.131269	-0.244393
LETMD1	LETM1 domain containing 1	0.956228	0.0247894	0.0381782	0.23444	2.12346e-31	1.23081
SLC4A8	solute carrier family 4 member 8	0.945342	-0.0235366	0.550904	-0.150356	0.106163	-0.226132
LAMC3	laminin subunit gamma 3	nan	-1.23514	nan	-1.51077	0.801744	0.310463
PTGER3	prostaglandin E receptor 3	0.200145	0.844937	0.268364	0.620069	0.56647	0.333233
TNIP3	TNFAIP3 interacting protein 3	nan	0	nan	0.720846	nan	1.11548
MAPK9	mitogen-activated protein kinase 9	0.528974	-0.150796	0.367743	-0.198748	0.00180117	-0.457331
COL23A1	collagen type XXIII alpha 1 chain	4.16341e-06	-2.81451	1.6588e-05	-2.18451	3.63933e-15	2.23434
BCAR1	BCAR1, Cas family scaffolding protein	0.719719	0.0933249	0.767599	-0.0994461	3.71479e-10	-0.756325
FAM160A2	family with sequence similarity 160 member A2	0.698411	0.222342	0.451517	0.201479	0.174015	0.355922
HERPUD1	homocysteine inducible ER protein with ubiquitin like domain 1	0.0189287	-0.256846	2.74802e-24	-0.961528	2.64607e-23	-0.939733
HOMER3	homer scaffolding protein 3	0.387527	0.181438	0.219758	0.136311	1.66213e-05	-0.589629
RAD51	RAD51 recombinase	0.982704	0.000321027	0.914934	-0.0741104	0.5096	-0.213643
POLQ	DNA polymerase theta	0.914113	0.153905	0.521453	-0.467145	0.949752	-0.0275417
PIK3CB	phosphatidylinositol-4,5-bisphosphate 3-kinase catalytic subunit beta	0.905796	-0.081088	0.804105	-0.159668	0.859343	0.0565415
CYBA	cytochrome b-245 alpha chain	4.93942e-09	-0.473311	4.42722e-27	-0.887823	0.000431916	0.25746
THOC3	THO complex 3	0.54161	-0.178668	0.000405705	-0.671899	0.0278633	0.373202
HEBP2	heme binding protein 2	0.000358377	0.419934	2.31466e-06	-0.593235	0.00550603	-0.346359
MPHOSPH9	M-phase phosphoprotein 9	0.134355	-0.357753	0.165706	-0.326623	0.142294	0.252954
PLEKHA5	pleckstrin homology domain containing A5	0.862325	0.113942	0.00355077	0.630056	0.529614	-0.224751
PRSS8	protease, serine 8	nan	2.07608	0.239374	1.51922	0.483472	-inf
SIKE1	suppressor of IKBKE 1	0.489311	-0.149582	0.00897149	-0.396488	1.05128e-20	0.987577
RRP12	ribosomal RNA processing 12 homolog	0.618045	0.204886	0.301041	0.199556	7.09249e-10	1.01793
FNIP2	folliculin interacting protein 2	0.970535	-0.0170742	0.194223	0.192564	5.90673e-06	-0.800546
MSMO1	methylsterol monooxygenase 1	2.81088e-144	1.63898	0.233724	-0.158884	4.43894e-07	0.362869
TTC17	tetratricopeptide repeat domain 17	0.0872977	0.268685	1.06573e-09	0.596723	6.28816e-13	0.750419
ALX4	ALX homeobox 4	nan	-0.584962	nan	-0.284568	nan	1.70454
FSTL4	follistatin like 4	0.609669	-0.538892	0.0766543	-1.17643	0.992508	-0.0387882
FOXN3	forkhead box N3	0.998798	0.0127788	0.00250568	0.283163	6.91435e-05	0.398118
METTL24	methyltransferase like 24	nan	-inf	nan	-inf	nan	inf
AKR7A2	aldo-keto reductase family 7 member A2	0.84799	-0.0511109	0.534155	-0.148621	0.199626	0.149279
MRTO4	MRT4 homolog, ribosome maturation factor	0.509774	-0.182032	0.045536	-0.375691	0.949667	-0.0319196
NNAT	neuronatin	0.685901	-1.17959	0.654838	-0.647007	4.40827e-38	5.06153
USE1	unconventional SNARE in the ER 1	0.575938	-0.166655	0.00236024	0.386441	0.0660896	0.275775
MCF2L2	MCF.2 cell line derived transforming sequence-like 2	0.80125	-0.38033	0.991026	-0.043032	0.623534	-0.43496
NRIP2	nuclear receptor interacting protein 2	nan	-0.686761	0.31121	-1.11437	0.0255554	-2.88786
LAMA3	laminin subunit alpha 3	nan	-2.58941	nan	-0.868562	0.753339	0.532221
AP5M1	adaptor related protein complex 5 mu 1 subunit	0.96482	-0.0203813	0.754022	-0.118831	0.0219879	-0.408788
ANAPC4	anaphase promoting complex subunit 4	0.638831	0.215285	0.456546	0.177688	0.862383	0.0370205
KCNQ1	potassium voltage-gated channel subfamily Q member 1	0.7646	-0.266534	0.510187	-0.381924	0.0110269	0.858734
TRAPPC3	trafficking protein particle complex 3	0.00938765	-0.27148	0.482761	-0.142832	0.959258	-0.00758878
THRAP3	thyroid hormone receptor associated protein 3	0.12359	-0.384328	0.148731	-0.37928	0.00492415	-0.572758
PHPT1	phosphohistidine phosphatase 1	0.923593	-0.0138331	5.38621e-06	0.261828	0.473776	-0.0794335
ENTPD2	ectonucleoside triphosphate diphosphohydrolase 2	nan	1.99331	nan	2.03953	nan	0.127756
ARID4B	AT-rich interaction domain 4B	0.641248	0.188087	0.511486	0.108223	0.0186504	-0.487411
OPN3	opsin 3	nan	1.31657	nan	0.300395	nan	-inf
SDCCAG8	serologically defined colon cancer antigen 8	0.0675411	0.535516	0.000379169	0.741163	0.954131	-0.0554804
PTPRN	protein tyrosine phosphatase, receptor type N	2.50545e-09	-0.477798	1.54651e-17	-0.702801	0.0630516	-0.176624
HHAT	hedgehog acyltransferase	0.913022	0.0643533	0.301306	0.195567	0.646675	-0.142015
KIF1B	kinesin family member 1B	0.929835	-0.0206246	0.08528	-0.268705	0.0628973	-0.247076
FOXC1	forkhead box C1	0.254187	0.13355	7.51633e-26	-0.824691	0.762457	-0.0451915
TBC1D22A	TBC1 domain family member 22A	0.766143	0.132153	0.484755	0.126893	0.00161517	-0.660654
SYNE2	spectrin repeat containing nuclear envelope protein 2	0.974028	0.0250609	0.893637	-0.00311665	0.173548	-0.357704
PLEKHH1	pleckstrin homology, MyTH4 and FERM domain containing H1	0.508835	0.992575	0.164904	1.19116	0.740941	0.407612
ATP9A	ATPase phospholipid transporting 9A (putative)	0.0128818	-0.36997	1.36364e-07	-0.709173	4.07987e-08	-0.724936
CBLN4	cerebellin 4 precursor	nan	3.16398	nan	-inf	nan	1.70454
CHRDL2	chordin like 2	nan	inf	nan	inf	nan	inf
FAM168A	family with sequence similarity 168 member A	0.343066	-0.163473	0.0811675	-0.264938	0.404779	-0.124398
RELT	RELT, TNF receptor	0.304084	-0.42007	0.017377	-0.736047	0.362352	-0.307982
GALC	galactosylceramidase	0.633046	-0.253364	0.606993	0.133922	0.222252	0.34584
NOP58	NOP58 ribonucleoprotein	0.00410786	-0.298717	4.03495e-05	-0.427767	0.00030043	-0.352699
SZRD1	SUZ RNA binding domain containing 1	0.936285	0.0230162	0.830945	-0.0767078	0.00243845	-0.27505
KCNH2	potassium voltage-gated channel subfamily H member 2	0.0458539	0.196143	0.017377	0.142496	0.016657	-0.211126
CUL1	cullin 1	0.777265	0.105163	0.565476	0.0688907	0.000202895	-0.543325
FAM114A2	family with sequence similarity 114 member A2	0.974719	-0.0125818	0.275743	-0.275391	0.33495	-0.205917
CYFIP2	cytoplasmic FMR1 interacting protein 2	0.000354572	-0.373484	8.65428e-13	-0.704974	3.87907e-05	-0.414553
TAB2	TGF-beta activated kinase 1/MAP3K7 binding protein 2	0.879768	-0.0393504	0.13579	-0.247522	0.0815737	0.206552
GINM1	glycoprotein integral membrane 1	0.615415	-0.151287	0.321646	0.146892	0.00673508	0.422662
EIF2AK2	eukaryotic translation initiation factor 2 alpha kinase 2	0.632254	0.112269	4.31371e-05	0.392413	0.653218	0.0537751
USP36	ubiquitin specific peptidase 36	0.335193	0.286413	0.00172946	0.535117	0.0429522	0.385301
KMT2C	lysine methyltransferase 2C	0.426839	0.203439	0.00818323	0.345654	0.402562	0.133997
MCOLN3	mucolipin 3	nan	inf	nan	-inf	nan	-inf
CCDC85A	coiled-coil domain containing 85A	nan	-inf	nan	inf	nan	-inf
PUM2	pumilio RNA binding family member 2	0.278767	0.211475	0.116468	0.173711	0.645041	0.0708958
MRPL43	mitochondrial ribosomal protein L43	0.755954	-0.0589137	0.620609	0.00632322	0.956305	-0.0101638
ITIH4	inter-alpha-trypsin inhibitor heavy chain family member 4	0.224919	1.02299	0.0512623	1.1698	0.461001	0.547793
ITIH1	inter-alpha-trypsin inhibitor heavy chain 1	nan	-inf	nan	-inf	nan	-inf
HPF1	histone PARylation factor 1	0.066126	0.267536	0.614173	0.0303744	0.203845	0.150197
ZFR	zinc finger RNA binding protein	0.887919	-0.0473611	0.361728	-0.218076	0.296395	0.167529
ZNF280C	zinc finger protein 280C	0.162628	-0.51622	0.113363	-0.515728	0.388215	0.258701
NPFFR2	neuropeptide FF receptor 2	0.063461	0.625157	0.978657	-0.0256285	0.281276	0.329628
PHF21B	PHD finger protein 21B	1.46251e-09	-0.732805	3.56945e-32	-1.48692	0.992757	-0.00591588
TRAF1	TNF receptor associated factor 1	nan	-0.00890555	0.154546	1.45174	0.713812	-0.884864
RC3H2	ring finger and CCCH-type domains 2	0.879886	-0.0498952	0.627002	0.0448394	0.000690918	-0.544114
IL17RB	interleukin 17 receptor B	0.640527	0.339506	0.764543	-0.241155	0.57689	-0.342464
TRAF3IP2	TRAF3 interacting protein 2	0.928144	-0.0317241	5.56759e-41	-2.12548	1.04959e-51	-2.94949
GYG2	glycogenin 2	0.896703	0.0961293	0.878684	0.026276	0.00502348	-0.706683
DCBLD2	discoidin, CUB and LCCL domain containing 2	0.749645	-0.0993148	0.148497	0.184816	0.000271436	-0.567166
SOAT1	sterol O-acyltransferase 1	0.819034	-0.0653177	0.921601	-0.0303373	0.000404139	-0.532623
PKP2	plakophilin 2	0.546558	0.253339	0.194899	0.331589	0.44123	-0.267374
MSH4	mutS homolog 4	nan	-inf	nan	-inf	nan	inf
F7	coagulation factor VII	nan	1.5805	nan	1.88897	0.825155	0.704544
GDI2	GDP dissociation inhibitor 2	0.00222913	-0.222692	5.62771e-09	-0.420845	9.24964e-05	0.240618
PRDM1	PR/SET domain 1	nan	0	nan	0.720846	nan	0.127756
ATG5	autophagy related 5	0.989645	0.0180349	0.863604	-0.0897127	0.711281	0.07207
TMCC3	transmembrane and coiled-coil domain family 3	0.87129	0.143604	0.155769	-0.738094	0.757992	-0.188121
PITHD1	PITH domain containing 1	0.636192	-0.127758	0.0188436	-0.406791	0.115212	0.218956
MTA3	metastasis associated 1 family member 3	0.879138	0.0500482	0.597848	-0.121247	0.124684	0.160238
USP13	ubiquitin specific peptidase 13 (isopeptidase T-3)	0.984559	-0.00823358	0.545514	0.114452	0.702387	-0.128581
ATP11B	ATPase phospholipid transporting 11B (putative)	0.64134	-0.262046	0.430564	-0.343417	0.454604	0.217995
LAMC2	laminin subunit gamma 2	0.802751	-0.424393	0.443848	-0.800047	0.574021	0.438819
CDK14	cyclin dependent kinase 14	0.725602	0.140394	0.98612	-0.0400886	0.233261	-0.260529
SEC61A1	Sec61 translocon alpha 1 subunit	0.0480821	-0.175755	0.159202	0.08182	0.782788	0.0179376
PPP1R12A	protein phosphatase 1 regulatory subunit 12A	0.247962	0.249687	0.506329	0.099107	0.166202	0.205077
RASGRF1	Ras protein specific guanine nucleotide releasing factor 1	nan	-inf	nan	-1.29546	nan	1.12163
CAMK2B	calcium/calmodulin dependent protein kinase II beta	0.873418	-0.147955	0.187171	-0.691499	0.000891453	-1.58373
CROCC	ciliary rootlet coiled-coil, rootletin	0.0985138	0.447802	0.0916727	0.316966	0.539329	-0.159929
POLR3E	RNA polymerase III subunit E	0.912279	-0.0380572	0.53491	-0.194048	0.001094	0.519389
ATP2B4	ATPase plasma membrane Ca2+ transporting 4	0.604666	0.133032	1.82747e-27	1.07494	0.807811	-0.0630265
ZC3H11A	zinc finger CCCH-type containing 11A	0.573343	0.110075	0.0779442	0.148884	0.015664	0.233005
RIOK2	RIO kinase 2	0.559238	0.248314	0.757976	0.0610644	0.581365	0.140186
YIPF1	Yip1 domain family member 1	0.641539	-0.138824	0.852225	-0.0014742	0.243089	0.184824
NDC1	NDC1 transmembrane nucleoporin	0.2988	-0.266907	0.0538826	-0.40349	0.0371463	0.320274
DGKG	diacylglycerol kinase gamma	0.499737	-0.935565	0.101449	-1.72626	0.590023	0.453429
FLYWCH1	FLYWCH-type zinc finger 1	0.781114	-0.0910923	0.924274	-0.0172343	0.0466907	-0.346026
UNKL	unkempt family like zinc finger	0.890748	-0.0382656	3.57228e-12	0.674556	0.00799858	-0.347727
TBXAS1	thromboxane A synthase 1	0.963033	-0.0442114	0.903184	-0.149839	0.677211	-0.286621
PARP12	poly(ADP-ribose) polymerase family member 12	0.0210242	1.81874	0.955596	-0.0418202	0.509981	0.658235
ALDH18A1	aldehyde dehydrogenase 18 family member A1	0.737415	-0.086023	0.538023	-0.156761	0.575934	0.0798588
TARBP1	TAR (HIV-1) RNA binding protein 1	0.16179	0.461345	0.0333592	0.48697	0.000255619	0.790133
GATB	glutamyl-tRNA amidotransferase subunit B	0.518522	0.223971	0.0011559	0.542088	0.81694	-0.0927603
MXD1	MAX dimerization protein 1	0.160443	0.645987	0.245777	0.429168	0.086052	0.612658
CDK17	cyclin dependent kinase 17	0.998798	0.0204773	0.749375	0.0623767	0.924116	0.0273266
DNAJC25	DnaJ heat shock protein family (Hsp40) member C25	0.797088	0.173851	0.956291	-0.00898598	0.00271171	0.722154
SLC2A3	solute carrier family 2 member 3	nan	-1.58941	0.781154	0.453366	0.0330647	1.92366
PSD	pleckstrin and Sec7 domain containing	0.267109	-0.28306	0.212723	-0.305063	0.627641	-0.127808
CTDP1	CTD phosphatase subunit 1	0.77083	-0.147969	0.997075	-0.0458213	0.922934	-0.0555889
YBX3	Y-box binding protein 3	nan	0	nan	0.720846	nan	-inf
WNK1	WNK lysine deficient protein kinase 1	0.238682	0.181157	0.000357704	0.297308	0.0473179	0.192444
RPS17P5	ribosomal protein S17 pseudogene 5	nan	1.57901	0.793384	0.720846	0.102389	2.12163
CCAR1	cell division cycle and apoptosis regulator 1	0.964964	0.0574761	0.894458	-0.102045	3.65355e-06	-1.17842
OGFR	opioid growth factor receptor	0.903447	-0.0431265	0.704514	-0.129841	0.602771	-0.113239
GNA15	G protein subunit alpha 15	nan	-inf	nan	-inf	nan	1.11548
CREB3L3	cAMP responsive element binding protein 3 like 3	nan	1.21412	0.60441	0.83063	0.0204996	2.05445
PIGV	phosphatidylinositol glycan anchor biosynthesis class V	0.992616	0.0111212	0.159044	0.224192	0.000162452	0.604576
PTPRU	protein tyrosine phosphatase, receptor type U	0.0063605	-0.450384	1.3901e-06	-0.726188	0.524644	0.0918058
SNRNP40	small nuclear ribonucleoprotein U5 subunit 40	0.0295777	-0.433608	2.27286e-05	-0.751211	0.466542	-0.161445
RIMBP2	RIMS binding protein 2	0.796616	0.113588	6.7091e-10	-1.17833	0.456102	-0.173483
COL11A1	collagen type XI alpha 1 chain	1.93956e-08	3.45053	0.905721	-0.0635251	2.68551e-33	5.3257
QSER1	glutamine and serine rich 1	0.380223	-0.236178	0.955422	-0.065773	0.637895	0.0835902
MPC1	mitochondrial pyruvate carrier 1	0.0604157	-0.302739	2.6627e-06	-0.644882	0.00105165	-0.438385
ACAA1	acetyl-CoA acyltransferase 1	nan	1.15731	nan	-1.28582	0.408048	1.28284
BCAT1	branched chain amino acid transaminase 1	0.340252	0.159466	2.19587e-06	0.419993	2.50756e-44	-1.72462
HDAC7	histone deacetylase 7	0.693046	0.182649	0.0231084	0.431007	0.0670327	-0.44104
LZTS1	leucine zipper tumor suppressor 1	0.64806	-0.187954	1.71091e-05	-0.921884	1.45351e-10	-1.36762
PRDM6	PR/SET domain 6	nan	-1.25548	0.634499	-0.533321	0.509089	-0.671637
WNT8A	Wnt family member 8A	nan	inf	nan	-inf	nan	-inf
SPAG4	sperm associated antigen 4	0.768731	-0.143519	0.0206373	0.44526	7.38237e-06	0.841765
NCKAP1	NCK associated protein 1	0.372032	0.143737	0.763092	-0.0963975	0.283702	0.110099
MRPS35	mitochondrial ribosomal protein S35	0.954909	0.0416876	0.576712	0.0608637	0.647721	0.079887
GUCY1B3	guanylate cyclase 1 soluble subunit beta	0.0848951	-0.434484	0.0962482	-0.412595	0.117461	0.32013
SFSWAP	splicing factor SWAP homolog	0.0844941	0.312368	0.522959	0.0730785	0.426181	0.12036
TNK2	tyrosine kinase non receptor 2	0.85921	0.0654526	0.179099	0.154619	0.253527	0.158426
MON2	MON2 homolog, regulator of endosome-to-Golgi trafficking	0.941078	0.058535	0.116763	0.294	0.0098191	0.499146
CDH3	cadherin 3	0.921699	-0.177909	0.447036	-0.752852	0.000312702	1.83045
ARSF	arylsulfatase F	nan	1.31657	nan	-0.279154	nan	0.115477
GPBP1	GC-rich promoter binding protein 1	0.935305	-0.0176327	0.024194	-0.319898	1.11816e-05	0.432236
DGAT2	diacylglycerol O-acyltransferase 2	0.217194	-0.666409	0.444831	-0.411539	0.386371	0.359564
ZNF112	zinc finger protein 112	0.0944958	0.771376	0.0837262	0.629285	0.0242653	-1.0898
CS	citrate synthase	0.156919	-0.156914	0.988008	-0.0368698	0.00305355	0.239975
LTK	leukocyte receptor tyrosine kinase	0.561033	-0.29995	2.28303e-05	-1.30458	0.000255484	-1.12562
MRPS24	mitochondrial ribosomal protein S24	0.0188343	-0.212601	0.400934	-0.140911	5.70992e-08	0.369243
ELMO2	engulfment and cell motility 2	0.601769	0.154321	0.427927	0.108002	0.648532	0.0799912
WAPL	WAPL cohesin release factor	0.984671	0.0285692	0.53019	0.0913868	0.833993	-0.0612628
VMP1	vacuole membrane protein 1	0.649996	-0.0634965	0.00252397	-0.295797	0.692391	0.0325829
APPBP2	amyloid beta precursor protein binding protein 2	0.865453	0.0502682	0.0588367	0.175545	0.48604	-0.121989
POLD1	DNA polymerase delta 1, catalytic subunit	0.760164	0.109468	0.992384	-0.0421847	0.00202989	0.430297
SEZ6	seizure related 6 homolog	1.18599e-05	-0.845637	4.48913e-06	-0.873107	0.00268023	-0.567691
EIF4B	eukaryotic translation initiation factor 4B	0.775093	-0.0404506	0.00458393	0.15599	2.12205e-27	0.6612
SLC6A16	solute carrier family 6 member 16	0.0887316	1.53312	0.197658	1.11529	0.111037	1.24371
BICRA	BRD4 interacting chromatin remodelling complex associated protein	0.14286	0.43762	0.33934	0.206979	0.511555	-0.21473
SPHK2	sphingosine kinase 2	0.0695449	0.330933	2.47817e-06	0.555226	0.0611191	-0.303848
RPL18	ribosomal protein L18	0.436758	-0.0788684	0.673992	-0.0989608	1.11343e-19	0.499059
CA11	carbonic anhydrase 11	0.395049	0.321814	1.20374e-06	0.939849	0.000301721	0.76908
ISOC2	isochorismatase domain containing 2	0.114789	-0.276282	0.000651297	-0.517014	3.87165e-05	-0.572424
U2AF2	U2 small nuclear RNA auxiliary factor 2	0.998798	0.00088806	0.474096	-0.17596	1.42472e-06	-0.654684
EPN1	epsin 1	0.791479	0.0524585	0.520722	0.023273	0.317657	-0.11427
MED29	mediator complex subunit 29	0.989276	-0.0016048	0.882306	-0.0184181	0.623036	-0.106485
AHRR	aryl-hydrocarbon receptor repressor	0.991084	0.0657753	0.983387	-0.0733366	0.538927	0.512609
ZNF275	zinc finger protein 275	0.59715	-0.226666	0.886062	0.00850886	0.327116	-0.281841
MTMR1	myotubularin related protein 1	0.988625	-0.00817732	0.899879	-0.00139285	0.0161862	-0.759145
GPC1	glypican 1	0.27682	0.220073	3.37302e-06	0.510176	0.706685	-0.0823595
ADCK1	aarF domain containing kinase 1	0.676975	0.254769	0.719338	0.106704	0.222217	0.393332
HAGH	hydroxyacylglutathione hydrolase	0.361044	0.151594	0.650744	-0.12025	0.225196	-0.163583
RNF4	ring finger protein 4	0.881912	0.0586033	0.0294164	0.250191	0.0297498	-0.324471
CASP8	caspase 8	0.916648	-0.199803	0.0161183	1.4167	0.115478	-1.88171
LIMCH1	LIM and calponin homology domains 1	0.0384462	-0.382026	0.00329089	-0.510975	0.00622051	-0.437795
INTS13	integrator complex subunit 13	0.876469	0.0884637	0.694876	-0.148409	0.179855	0.257382
TM7SF3	transmembrane 7 superfamily member 3	1.99513e-05	-0.355729	5.33437e-10	-0.520275	0.000116468	-0.323594
DLX3	distal-less homeobox 3	nan	-1.42731	nan	-0.477452	nan	-2.87558
SPA17	sperm autoantigenic protein 17	0.872025	-0.0847676	0.0323644	-0.543039	0.0228234	0.44304
TSPAN32	tetraspanin 32	nan	0	nan	3.1788	nan	-inf
WISP2	WNT1 inducible signaling pathway protein 2	nan	-0.0133584	nan	0.0328646	nan	-0.891187
ST3GAL6	ST3 beta-galactoside alpha-2,3-sialyltransferase 6	0.00983306	-0.577925	4.24636e-15	-1.57347	1.32471e-13	-1.49907
ATP2C2	ATPase secretory pathway Ca2+ transporting 2	0.955704	0.145025	0.667425	-0.546235	0.824133	-0.244783
NGFR	nerve growth factor receptor	0.0781204	0.287415	1.32626e-15	0.800238	2.24532e-16	0.869104
CDON	cell adhesion associated, oncogene regulated	0.302774	0.205739	0.00106372	0.358133	0.0974514	0.216909
TAF2	TATA-box binding protein associated factor 2	0.810454	0.130525	0.911518	-0.00647494	0.653306	0.10972
HIPK2	homeodomain interacting protein kinase 2	0.686097	-0.0961237	0.0330272	0.211724	1.04188e-12	-0.850264
TNPO3	transportin 3	0.99993	0.00523271	0.265896	0.0903041	0.0141928	0.24153
RFXANK	regulatory factor X associated ankyrin containing protein	0.503394	-0.120898	0.220452	-0.207899	0.0158937	-0.283459
TMEM161A	transmembrane protein 161A	0.873418	-0.0451146	0.788316	0.0175158	0.0178293	0.302193
LPAR2	lysophosphatidic acid receptor 2	1.8004e-06	0.902934	0.8259	-0.127738	0.699601	-0.133108
CTSA	cathepsin A	0.00419074	-0.263735	1.76828e-46	0.922119	3.55123e-18	-0.699532
SUGP2	SURP and G-patch domain containing 2	0.91023	0.0404923	0.861428	-0.07145	4.30572e-05	0.396024
SLC12A2	solute carrier family 12 member 2	0.712556	-0.1562	0.0975314	-0.425161	0.590839	0.129206
SNX24	sorting nexin 24	0.626112	0.170723	0.53019	0.0846036	1.52904e-07	0.766641
EYA2	EYA transcriptional coactivator and phosphatase 2	nan	-inf	nan	-inf	nan	1.44478
CNN2	calponin 2	0.946079	-0.104272	0.557849	-0.537601	0.914254	0.0696522
ABCA7	ATP binding cassette subfamily A member 7	0.754759	-0.166555	0.00519159	0.593876	0.812155	-0.105332
SNCAIP	synuclein alpha interacting protein	0.338641	0.343479	0.0503115	0.427937	0.000138266	0.773897
DDX20	DEAD-box helicase 20	0.762926	0.13609	0.30393	-0.303116	0.834642	-0.0720149
BTBD1	BTB domain containing 1	0.895048	0.0503041	0.96416	-0.0373677	0.252806	-0.197457
FAR2	fatty acyl-CoA reductase 2	0.953422	0.0491984	0.733901	-0.215261	1.6044e-10	-2.43313
BCAS1	breast carcinoma amplified sequence 1	nan	-1.17959	nan	-3.46835	0.6556	0.533701
SBNO2	strawberry notch homolog 2	0.346811	0.253942	0.0986184	0.261398	0.077331	0.299937
PMS1	PMS1 homolog 1, mismatch repair system component	0.621104	0.195325	0.918919	-0.0859206	0.311411	0.22534
HMG20B	high mobility group 20B	0.868621	0.0422948	0.170179	0.0916319	1.408e-18	0.698552
CALCRL	calcitonin receptor like receptor	0.988976	0.0437361	0.0930182	0.915156	0.178885	-1.05225
TAF11	TATA-box binding protein associated factor 11	0.786842	-0.060578	0.969837	-0.0370078	0.0264289	-0.280372
ANKS1A	ankyrin repeat and sterile alpha motif domain containing 1A	0.916702	-0.0409788	0.20615	0.198771	0.0700588	0.303324
AP3D1	adaptor related protein complex 3 delta 1 subunit	0.919228	0.0357031	0.00211684	0.24264	0.462399	-0.0961613
ZNF76	zinc finger protein 76	0.981009	-0.0160214	0.549184	0.130926	0.00765997	-0.703792
SLC9A3R2	SLC9A3 regulator 2	0.082487	-0.315861	0.904487	-0.0750276	0.37079	-0.163675
NTHL1	nth like DNA glycosylase 1	0.707688	-0.0958586	0.869339	-0.0835711	0.922192	-0.0358202
UHRF1BP1	UHRF1 binding protein 1	0.932125	-0.0503362	0.708082	0.0738857	0.891564	-0.0592447
GNAI3	G protein subunit alpha i3	0.141782	0.158533	0.56843	-0.11161	0.059456	-0.16579
IPO5	importin 5	0.186158	-0.145508	0.172146	-0.175729	9.81334e-15	0.55393
OAT	ornithine aminotransferase	0.997371	0.0070833	0.438559	-0.143944	0.000593467	-0.357769
WDR3	WD repeat domain 3	0.812889	-0.0848471	0.752257	0.0445635	0.0392792	0.332321
PKN2	protein kinase N2	0.471443	-0.278807	0.86514	-0.128295	0.883948	-0.0659705
WDR18	WD repeat domain 18	0.555873	-0.132556	0.757001	-0.115603	0.000552617	-0.445966
TRAM2	translocation associated membrane protein 2	0.725302	-0.173501	0.308856	0.240258	0.19599	-0.374314
NTN1	netrin 1	nan	0	nan	-0.295456	nan	1.11548
GLP2R	glucagon like peptide 2 receptor	nan	inf	nan	-inf	nan	-inf
MCM10	minichromosome maintenance 10 replication initiation factor	0.786238	-0.107126	0.106983	-0.37269	0.102784	-0.353171
DGKA	diacylglycerol kinase alpha	0.820367	-0.0803122	0.946421	-0.0203016	1.98576e-06	-0.846226
ERBB3	erb-b2 receptor tyrosine kinase 3	0.903746	-0.129444	0.560015	-0.355525	0.117622	0.572297
ROPN1	rhophilin associated tail protein 1	nan	-1.58496	nan	-0.284568	nan	-1.45721
ANKRD44	ankyrin repeat domain 44	0.679385	-0.324656	0.70303	-0.262308	0.915753	-0.0694811
KARS	lysyl-tRNA synthetase	0.467013	-0.0847391	0.00574012	-0.252735	3.96119e-09	0.377969
ADAT1	adenosine deaminase, tRNA specific 1	0.524051	0.148577	0.00935918	0.272263	0.0573078	-0.271415
PDIA5	protein disulfide isomerase family A member 5	0.199496	-0.379497	0.919263	-0.0860498	0.0815955	0.336013
TBC1D22B	TBC1 domain family member 22B	0.759578	0.153376	0.0802766	0.354473	0.977703	0.000961293
NDUFB4	NADH:ubiquinone oxidoreductase subunit B4	8.78939e-05	-0.280487	0.0336971	-0.219127	0.0146309	-0.18911
SPEN	spen family transcriptional repressor	0.57033	0.180157	0.139922	0.229293	0.0662156	0.298073
MYLK	myosin light chain kinase	0.292	-0.331634	0.972042	-0.0199863	0.213659	-0.308112
ZC3H15	zinc finger CCCH-type containing 15	0.935305	-0.0279506	0.0869906	-0.275679	0.707342	-0.0690368
MAP2K4	mitogen-activated protein kinase kinase 4	0.865412	0.0704605	0.886032	-0.1009	0.529824	-0.177807
TMEM206	transmembrane protein 206	0.00754204	-0.335673	3.45784e-09	-0.677835	0.125484	-0.20452
SNAP91	synaptosome associated protein 91	0.781726	-0.0596207	3.91172e-09	-0.791416	0.447528	-0.133539
SLK	STE20 like kinase	0.818281	0.111228	0.789058	0.0175994	0.618162	0.102596
CYB5R4	cytochrome b5 reductase 4	0.203262	-0.300796	0.00287263	-0.593326	0.77353	-0.0868359
COL17A1	collagen type XVII alpha 1 chain	0.00330463	1.93926	0.969246	-0.0923483	0.563504	0.556774
GSTO2	glutathione S-transferase omega 2	0.925877	-0.160465	0.45411	0.56394	0.0323919	1.22125
SEC61A2	Sec61 translocon alpha 2 subunit	0.0398289	-0.454465	0.0509983	-0.440139	0.44957	0.149028
PRKCQ	protein kinase C theta	0.931216	0.155518	0.752509	0.242811	0.250716	-0.940467
TLE2	transducin like enhancer of split 2	0.799819	0.119035	0.0593844	0.307759	0.258788	0.211143
ASB1	ankyrin repeat and SOCS box containing 1	0.998502	0.0120096	0.150852	0.217948	6.88418e-05	-0.639495
FAM107B	family with sequence similarity 107 member B	0.788921	0.0874162	0.104789	0.179641	0.000290738	-0.452158
ME1	malic enzyme 1	0.125104	0.267573	0.33509	-0.197409	0.368932	-0.146946
TBC1D1	TBC1 domain family member 1	0.297747	0.218797	0.219388	0.155361	5.14476e-08	0.657568
CDK13	cyclin dependent kinase 13	0.167734	0.292177	0.154948	0.200386	0.613506	0.0846995
MTHFD2	methylenetetrahydrofolate dehydrogenase (NADP+ dependent) 2, methenyltetrahydrofolate cyclohydrolase	0.0412746	-0.309794	1.32705e-09	-0.77611	0.622347	0.067221
SLC9A7	solute carrier family 9 member A7	0.843719	-0.106608	0.207562	0.280587	0.668848	0.125544
FOXJ2	forkhead box J2	0.830764	-0.127513	0.515186	0.173376	0.594067	0.162078
YBX1	Y-box binding protein 1	0.151268	-0.112255	9.26186e-22	-0.602691	0.906449	0.00625888
PDE4A	phosphodiesterase 4A	0.96482	-0.0321005	7.57924e-06	0.840486	0.35971	0.22337
PPP2R5A	protein phosphatase 2 regulatory subunit B'alpha	0.667988	0.207752	0.305917	0.243006	0.200057	0.325235
CTNNA2	catenin alpha 2	0.386661	-0.161492	0.832498	-0.0176614	1.26713e-06	-0.606111
ELAVL1	ELAV like RNA binding protein 1	0.735777	-0.0770933	0.663097	-0.120189	0.13179	0.164683
TIE1	tyrosine kinase with immunoglobulin like and EGF like domains 1	nan	-inf	nan	0.720846	nan	1.11548
DIP2B	disco interacting protein 2 homolog B	0.40743	-0.220019	0.118221	0.253227	0.0169937	-0.434192
SMARCD1	SWI/SNF related, matrix associated, actin dependent regulator of chromatin, subfamily d, member 1	0.108621	0.226673	0.0700459	-0.262788	0.567041	0.0598153
KDM4A	lysine demethylase 4A	0.992758	0.0138297	0.999657	-0.0493337	0.000134078	-0.523396
NFYC	nuclear transcription factor Y subunit gamma	0.866161	0.0673586	0.135042	-0.313379	0.043316	-0.348477
ZMYND12	zinc finger MYND-type containing 12	0.727909	-0.686761	0.884263	0.109056	0.301868	0.761413
SLC9A3	solute carrier family 9 member A3	nan	inf	nan	-inf	nan	-inf
NGEF	neuronal guanine nucleotide exchange factor	0.239936	1.38388	0.808609	-0.477452	0.00143591	2.20467
ASPM	abnormal spindle microtubule assembly	0.0238995	0.439893	0.59887	-0.178882	1.59597e-20	1.25863
CD84	CD84 molecule	nan	1	nan	0.720846	nan	-inf
ELOVL1	ELOVL fatty acid elongase 1	0.0890442	0.273388	0.0269601	0.237789	1.59038e-06	-0.625082
SPI1	Spi-1 proto-oncogene	nan	inf	nan	inf	nan	inf
ZNRD1	zinc ribbon domain containing 1	0.991506	-0.00548495	0.0141008	-0.424884	0.121088	0.216952
MPPED2	metallophosphoesterase domain containing 2	7.50765e-15	-0.769242	1.49555e-142	-4.10218	0.949148	0.00171132
CLDN18	claudin 18	nan	-0.00893313	nan	-inf	nan	-0.469485
ZBTB11	zinc finger and BTB domain containing 11	0.515487	-0.25192	0.560575	0.123527	0.0615792	0.394945
ATXN3	ataxin 3	0.969712	0.025608	0.580839	0.081232	0.292676	0.193243
GOLGA5	golgin A5	0.923593	0.0633804	0.387595	0.164562	6.49582e-11	1.03851
FGFR2	fibroblast growth factor receptor 2	0.967676	-0.0262285	0.633495	-0.301916	0.406329	0.30065
LRRC40	leucine rich repeat containing 40	0.506849	-0.247088	0.187965	-0.37876	0.216218	-0.306177
ISOC1	isochorismatase domain containing 1	0.100665	-0.189481	7.34751e-09	-0.545736	0.0840452	-0.182602
EML1	echinoderm microtubule associated protein like 1	0.693744	0.211097	0.863984	-0.130856	0.402719	-0.290745
TRMT11	tRNA methyltransferase 11 homolog	0.475338	0.272306	0.301306	-0.322277	0.00391042	0.57853
THUMPD1	THUMP domain containing 1	0.902791	-0.0435169	0.99371	-0.0391791	0.649371	0.0936318
MSANTD3	Myb/SANT DNA binding domain containing 3	0.915626	-0.0291245	0.974505	-0.0369599	0.00528621	-0.357219
KIF26A	kinesin family member 26A	1.15368e-05	0.381236	0.0611808	-0.231362	0.00702924	-0.258413
ATG2B	autophagy related 2B	0.971544	-0.0253028	0.765409	0.0681257	0.761875	-0.112437
ARFGEF1	ADP ribosylation factor guanine nucleotide exchange factor 1	0.727658	0.176103	0.534609	0.145219	0.237871	0.272266
ACSM2B	acyl-CoA synthetase medium-chain family member 2B	nan	inf	nan	-inf	nan	-inf
ZFAT	zinc finger and AT-hook domain containing	0.809843	0.246106	0.587764	-0.362103	0.922971	0.0653494
MTFR1	mitochondrial fission regulator 1	0.756472	0.134972	0.0509615	-0.475805	0.0433785	0.395372
STAG3	stromal antigen 3	0.92238	0.0964186	0.828209	0.0715486	0.00550013	0.76764
FECH	ferrochelatase	0.0430968	0.365658	0.059651	0.244607	0.249408	0.179184
MYO9A	myosin IXA	0.678596	0.229093	0.00308729	0.680318	0.146808	0.383885
DDX3Y	DEAD-box helicase 3, Y-linked	nan	-inf	nan	-inf	nan	-inf
PFKP	phosphofructokinase, platelet	6.06479e-07	-0.406277	6.66361e-18	-0.70275	5.23946e-16	-0.653256
IDI1	isopentenyl-diphosphate delta isomerase 1	1.42994e-110	1.36195	2.22486e-07	-0.420619	0.732994	0.0231183
SP100	SP100 nuclear antigen	0.616686	-0.266752	0.46239	-0.332341	0.0116182	-0.813977
KLF6	Kruppel like factor 6	0.00251001	0.471275	0.132234	-0.292839	0.455372	-0.146027
PLPP1	phospholipid phosphatase 1	0.735151	-0.0715675	0.058359	0.184674	0.548885	0.0764095
NEO1	neogenin 1	0.118214	-0.249108	0.978417	-0.0419815	0.00419603	0.311769
TRAM1	translocation associated membrane protein 1	0.671245	0.129258	0.28429	0.13334	0.231047	0.174065
PHKA1	phosphorylase kinase regulatory subunit alpha 1	0.923791	0.0721464	0.448984	0.164455	0.00451081	0.576424
TNFRSF1A	TNF receptor superfamily member 1A	0.000728741	0.557077	3.93532e-25	1.27978	0.0098191	-0.474757
CACNB1	calcium voltage-gated channel auxiliary subunit beta 1	0.891705	0.0884016	0.060442	-0.524312	0.000344999	-0.897275
EVI5	ecotropic viral integration site 5	0.432401	-0.217139	0.725164	0.0532251	0.299947	-0.223075
STOML1	stomatin like 1	0.989682	-0.00267776	0.693297	-0.146059	0.924727	-0.0356265
PKM	pyruvate kinase, muscle	2.37605e-09	-0.406173	4.82417e-20	-0.639249	1.46954e-32	-0.782593
DHX29	DExH-box helicase 29	0.802751	0.137433	0.713922	0.0831701	0.625423	-0.141797
DNTTIP2	deoxynucleotidyltransferase terminal interacting protein 2	0.696632	0.112119	0.989643	-0.0447948	0.935859	0.0030749
METTL22	methyltransferase like 22	0.733702	0.141692	0.614291	-0.175953	0.00100473	0.561098
TP53BP1	tumor protein p53 binding protein 1	0.903885	-0.0360164	0.455298	-0.189358	0.741176	0.0641058
TRO	trophinin	0.989071	0.00192026	0.911389	-0.0298543	0.248396	-0.166641
RRP15	ribosomal RNA processing 15 homolog	0.802664	-0.108143	0.380773	-0.26144	0.00550329	-0.604877
RHOA	ras homolog family member A	0.151604	0.113273	0.0650449	-0.155661	0.346196	-0.0715798
DHX8	DEAH-box helicase 8	0.42014	0.185528	0.177937	0.157827	0.644285	0.0650256
PMS2P4	PMS1 homolog 2, mismatch repair system component pseudogene 4	nan	-0.00802242	0.81343	-0.435629	0.70198	-0.620053
PRKCZ	protein kinase C zeta	0.773772	0.273361	0.704125	-0.28377	0.870566	-0.0961432
ZFY	zinc finger protein, Y-linked	nan	inf	nan	-inf	nan	-inf
IARS2	isoleucyl-tRNA synthetase 2, mitochondrial	0.805078	0.0727306	0.0204017	0.203315	0.00187349	0.310106
SYT1	synaptotagmin 1	0.906849	0.0417283	0.000581803	0.323368	0.00708233	-0.327091
NAV3	neuron navigator 3	nan	-0.596103	nan	-0.54988	nan	-2.46165
IDH3G	isocitrate dehydrogenase 3 (NAD(+)) gamma	0.953215	-0.0197107	0.775501	-0.126557	0.267446	-0.194691
ROGDI	rogdi homolog	0.989071	0.00712533	0.664164	-0.128237	0.884187	0.0105588
PDZD4	PDZ domain containing 4	0.726328	-0.0802321	0.0131915	-0.337305	0.597684	-0.0898345
ATP2B3	ATPase plasma membrane Ca2+ transporting 3	0.79408	0.165583	0.000177203	0.894888	0.00193717	-0.990862
ROCK1	Rho associated coiled-coil containing protein kinase 1	0.839111	0.104866	0.650099	0.0800224	0.507884	-0.171556
CBFB	core-binding factor beta subunit	0.53446	0.14599	0.176727	-0.235114	0.351471	0.12454
PDK3	pyruvate dehydrogenase kinase 3	0.481397	-0.418035	0.11327	-0.672453	0.810688	0.0843241
HYAL2	hyaluronoglucosaminidase 2	0.6565	-0.0873724	0.000149593	0.323335	0.8288	0.012474
HDAC4	histone deacetylase 4	0.561033	0.262576	0.987646	-0.0523464	0.0977468	0.410776
RASSF1	Ras association domain family member 1	0.626112	0.215192	0.932719	-0.00808963	0.0755671	0.380117
FGFR3	fibroblast growth factor receptor 3	0.771209	0.313465	0.612182	0.273605	0.0966618	0.754476
IFI35	interferon induced protein 35	0.923791	-0.112743	0.00721429	-1.62263	4.06248e-07	-5.30223
HEATR6	HEAT repeat containing 6	0.26577	0.343584	0.382025	0.176079	0.101987	0.358589
COASY	Coenzyme A synthase	7.72899e-05	0.437121	0.744849	0.00381652	0.821073	0.0224495
PLEKHH3	pleckstrin homology, MyTH4 and FERM domain containing H3	0.931531	0.0372761	0.307983	0.129656	0.682981	0.0643621
MEF2A	myocyte enhancer factor 2A	0.991155	0.00594891	0.85319	-0.101497	0.825674	-0.0648159
OTUD5	OTU deubiquitinase 5	0.865412	0.0513377	5.96732e-05	0.309106	0.00283499	0.259522
TFE3	transcription factor binding to IGHM enhancer 3	0.976427	-0.0060303	0.843368	-0.00299149	0.0157208	0.294103
TBC1D25	TBC1 domain family member 25	0.585909	0.230327	0.957517	-0.0663302	0.812559	0.0591093
ACSL4	acyl-CoA synthetase long-chain family member 4	0.000651394	0.524516	0.140318	-0.304855	0.0319153	-0.362523
INPP5A	inositol polyphosphate-5-phosphatase A	0.964018	-0.0261203	0.371288	0.160269	0.93809	0.0128308
GPKOW	G-patch domain and KOW motifs	0.267627	0.279018	0.288893	0.155229	0.0941703	0.27877
GRIPAP1	GRIP1 associated protein 1	0.835982	-0.0683694	0.0879332	0.221356	0.907963	0.0153876
FTSJ1	FtsJ RNA methyltransferase homolog 1 (E. coli)	0.52417	-0.157504	0.00192378	-0.487498	3.1841e-06	-0.653085
PRR11	proline rich 11	0.390741	0.28729	0.0207294	-0.578094	0.007459	0.520573
REEP1	receptor accessory protein 1	0.710142	0.182072	0.00731909	-0.654666	2.19438e-05	-0.98527
ATP11A	ATPase phospholipid transporting 11A	0.0479953	-0.410387	0.576121	0.0763791	0.301543	-0.209807
POLR1A	RNA polymerase I subunit A	0.67854	-0.141758	0.217371	-0.308154	0.00479266	-0.512461
LAPTM4A	lysosomal protein transmembrane 4 alpha	0.158728	-0.119151	4.99363e-07	0.259381	3.13131e-16	-0.505635
TTC7A	tetratricopeptide repeat domain 7A	0.581208	0.254868	0.0330904	0.481615	0.852399	0.0380486
IP6K2	inositol hexakisphosphate kinase 2	0.666646	0.0810495	0.139264	-0.19301	0.000121206	-0.339261
STON1-GTF2A1L	STON1-GTF2A1L readthrough	nan	-1.28707	0.656347	-0.564719	0.604113	-0.5101
SRBD1	S1 RNA binding domain 1	0.931216	-0.0317232	0.820016	-0.119351	0.496535	0.162815
KIF2A	kinesin family member 2A	0.890975	-0.0491062	0.000393696	-0.597536	0.49731	0.123758
RASGRP2	RAS guanyl releasing protein 2	0.481008	0.327639	0.789058	-0.170444	0.923359	0.0190945
PSME4	proteasome activator subunit 4	0.395366	0.230134	0.603751	0.0602431	0.00424303	0.447581
IFT80	intraflagellar transport 80	0.928175	0.043647	0.981939	-0.0509544	0.548753	-0.121205
SIRT2	sirtuin 2	0.851525	0.0647921	0.513801	0.0625221	0.00352577	-0.396924
ERLEC1	endoplasmic reticulum lectin 1	0.873072	-0.0346017	0.0362273	0.220458	1.67848e-06	0.513764
PPP2R5B	protein phosphatase 2 regulatory subunit B'beta	0.710142	0.138388	0.0375804	0.334246	0.291186	0.199781
PYGM	glycogen phosphorylase, muscle associated	0.727214	0.769336	0.0032035	2.19383	0.975879	-0.106622
PAGE1	PAGE family member 1	nan	-1	nan	1.03953	nan	1.70454
PITX1	paired like homeodomain 1	0.427839	-0.347974	0.204878	0.30434	4.10601e-11	-2.23531
MAST4	microtubule associated serine/threonine kinase family member 4	0.967676	0.0295283	0.0885478	0.330417	0.00169951	-0.726002
SDK2	sidekick cell adhesion molecule 2	0.00115837	-1.71906	0.500882	-0.476792	0.000680663	-1.66056
NUP133	nucleoporin 133	0.493743	0.18992	0.99371	-0.041862	0.199205	0.216127
NUCKS1	nuclear casein kinase and cyclin dependent kinase substrate 1	0.338721	-0.0876779	5.0567e-08	-0.380032	0.00153736	-0.215055
VPS35	VPS35, retromer complex component	0.0147173	0.243302	0.0053261	0.183132	4.15986e-05	-0.348567
DNAJA2	DnaJ heat shock protein family (Hsp40) member A2	0.148094	-0.218583	0.0339423	-0.303567	0.67078	-0.0728547
BCL3	B-cell CLL/lymphoma 3	0.344767	0.297592	4.12456e-07	0.827512	0.0144462	0.463431
KCNAB2	potassium voltage-gated channel subfamily A regulatory beta subunit 2	0.772	-0.141912	0.784082	-0.154639	0.729174	-0.125437
ABCC9	ATP binding cassette subfamily C member 9	nan	0.106915	0.650744	-0.70044	0.18285	-1.88486
GAL	galanin and GMAP prepropeptide	4.04283e-93	-2.28349	1.96818e-119	-2.68992	6.65274e-37	-1.28668
CLEC2D	C-type lectin domain family 2 member D	0.702609	-0.112683	0.690659	0.0401102	2.36164e-10	0.796032
FUNDC1	FUN14 domain containing 1	0.576656	-0.138708	0.459221	-0.181799	0.00493628	-0.401235
MAOB	monoamine oxidase B	6.76973e-37	-5.68144	9.10886e-44	-8.29347	1.10889e-10	-1.66776
RORA	RAR related orphan receptor A	0.347755	-0.431366	0.0712273	-0.629998	0.941044	0.0190945
DRD4	dopamine receptor D4	0.212754	0.715237	0.34239	0.459432	0.00698117	1.03066
TGFBR3	transforming growth factor beta receptor 3	nan	inf	nan	inf	nan	inf
PLA2G10	phospholipase A2 group X	nan	-1	nan	-1.29546	nan	0.115477
HES2	hes family bHLH transcription factor 2	0.932726	0.128636	0.22286	-1.28316	0.570899	0.438819
ATP1B3	ATPase Na+/K+ transporting subunit beta 3	0.735609	-0.0587556	0.222812	-0.183452	0.529614	0.0527799
NEDD4	neural precursor cell expressed, developmentally down-regulated 4, E3 ubiquitin protein ligase	0.962685	-0.0184512	0.203948	-0.434766	0.726772	-0.127784
PIGB	phosphatidylinositol glycan anchor biosynthesis class B	0.479456	0.228754	0.0038634	0.470026	0.739846	-0.105387
MAPK6	mitogen-activated protein kinase 6	0.84516	-0.066243	7.42551e-05	-0.642347	0.131222	-0.260593
GNB5	G protein subunit beta 5	0.825215	0.0881839	0.653774	0.0470656	0.44957	0.132307
RAB27A	RAB27A, member RAS oncogene family	0.82594	0.117261	0.0617045	0.317617	0.0111256	-0.550983
HDHD5	haloacid dehalogenase like hydrolase domain containing 5	0.586309	-0.127622	0.00813835	-0.403381	0.441493	0.101517
UFD1	ubiquitin recognition factor in ER associated degradation 1	0.504209	-0.10969	0.00780975	-0.328658	0.00363374	-0.311057
LRP6	LDL receptor related protein 6	0.787274	-0.06185	0.123885	-0.233913	0.00448996	0.285349
GUCY2C	guanylate cyclase 2C	nan	inf	nan	-inf	nan	-inf
SCT	secretin	nan	-1	nan	-0.279154	nan	-0.872244
PHRF1	PHD and ring finger domains 1	0.787274	0.122273	0.853534	0.016019	0.0775199	-0.354016
IKBKAP	inhibitor of kappa light polypeptide gene enhancer in B-cells, kinase complex-associated protein	0.769893	0.116695	0.611171	0.0798353	0.7591	-0.0739643
NUCB2	nucleobindin 2	0.0927461	-0.238661	1.10314e-05	0.411033	0.000739911	-0.391302
PFN2	profilin 2	0.000609468	-0.229305	1.88943e-07	-0.368492	1.09547e-09	-0.382695
PTPN3	protein tyrosine phosphatase, non-receptor type 3	0.981148	-0.00841368	0.000682081	0.855844	0.329293	-0.352664
SPTB	spectrin beta, erythrocytic	0.864745	0.328363	0.808584	0.221791	0.922916	0.115801
DAPP1	dual adaptor of phosphotyrosine and 3-phosphoinositides 1	nan	-inf	nan	3.30581	nan	0.127756
FGF10	fibroblast growth factor 10	nan	1.57428	0.605342	0.851542	0.939411	0.117523
SLC44A1	solute carrier family 44 member 1	0.287191	-0.145647	0.00263903	0.234674	0.741176	-0.0587919
TMEM260	transmembrane protein 260	0.656949	0.250682	0.677409	0.112355	0.373413	-0.327119
SMG6	SMG6, nonsense mediated mRNA decay factor	0.000194192	-0.410056	4.92389e-13	-0.754425	8.60102e-06	-0.473347
EXOC5	exocyst complex component 5	0.82982	-0.0541015	0.490835	-0.151284	0.0483035	-0.260555
CLTCL1	clathrin heavy chain like 1	0.991155	0.0205177	0.351697	0.475996	0.198922	0.610653
FGF22	fibroblast growth factor 22	0.971057	0.106915	0.768287	0.378512	0.213702	0.991094
FSTL3	follistatin like 3	0.788859	-0.0902763	3.8302e-25	1.21279	3.02248e-05	-0.670507
DGCR2	DiGeorge syndrome critical region gene 2	0.903885	0.0465371	0.332472	0.0974925	0.0539017	-0.264603
RNF126	ring finger protein 126	0.981148	-0.0154818	0.017696	-0.372967	0.402847	0.108027
MNT	MAX network transcriptional repressor	0.787928	-0.101124	0.489414	0.107254	0.272106	0.192072
ZXDC	ZXD family zinc finger C	0.639111	0.313465	0.721326	-0.244647	0.40738	-0.38066
JMJD6	arginine demethylase and lysine hydroxylase	0.915497	0.0432148	0.0793321	-0.3024	0.994873	-0.0191133
POLB	DNA polymerase beta	0.659886	-0.103285	0.536468	-0.155535	3.98816e-05	0.474361
WIPI1	WD repeat domain, phosphoinositide interacting 1	0.786238	0.0998071	0.0213625	0.314194	6.92133e-13	0.922094
FRMPD1	FERM and PDZ domain containing 1	nan	-0.744094	0.797714	0.302058	0.879989	-0.202968
GBA2	glucosylceramidase beta 2	0.728328	0.0785402	0.636599	0.0183629	0.326848	0.0954568
NDST1	N-deacetylase and N-sulfotransferase 1	0.610208	-0.143552	0.800868	0.0133317	3.47978e-11	-1.03195
ASNS	asparagine synthetase (glutamine-hydrolyzing)	0.555354	-0.0855821	1.0463e-14	-0.65315	2.95504e-19	-0.744939
AP3M2	adaptor related protein complex 3 mu 2 subunit	0.878024	0.08826	0.424693	0.140978	0.0519929	0.351482
CNGB1	cyclic nucleotide gated channel beta 1	nan	-inf	nan	0.720846	nan	0.127756
ST6GALNAC2	ST6 N-acetylgalactosaminide alpha-2,6-sialyltransferase 2	0.797899	0.369363	0.574901	0.393902	0.951208	0.0420105
CHAT	choline O-acetyltransferase	nan	-inf	nan	inf	nan	-inf
PABPC1	poly(A) binding protein cytoplasmic 1	0.571637	-0.0689266	0.0119491	0.145877	1.97764e-17	0.534587
TESK2	testis-specific kinase 2	0.979388	0.0558379	0.969062	-0.0990166	0.171901	0.827802
CFAP20	cilia and flagella associated protein 20	0.965406	-0.0100789	0.653734	-0.126225	0.519834	-0.103854
CSNK2A2	casein kinase 2 alpha 2	0.186807	-0.201896	0.962201	-0.0535363	0.066299	0.204876
PTPN21	protein tyrosine phosphatase, non-receptor type 21	0.629455	0.199494	0.696888	0.0740131	0.409536	-0.225419
EIF2B3	eukaryotic translation initiation factor 2B subunit gamma	0.997217	0.00647699	0.0117128	-0.465071	0.0866541	0.271234
CAMK2A	calcium/calmodulin dependent protein kinase II alpha	nan	0.99554	nan	1.59384	0.760374	-1.45721
TCOF1	treacle ribosome biogenesis factor 1	0.732287	0.0757658	0.0359544	0.164329	0.113732	-0.188411
CDC42	cell division cycle 42	0.576132	-0.0510942	0.00243213	-0.233982	8.50155e-14	-0.424963
OSBPL3	oxysterol binding protein like 3	0.849695	-0.114149	0.0133266	-0.796953	0.756234	-0.130136
EPHA8	EPH receptor A8	0.222371	-0.675771	0.475996	-0.39489	0.552315	-0.292214
RAD18	RAD18, E3 ubiquitin protein ligase	0.697387	-0.226583	0.220919	-0.474849	0.677886	0.129069
ATP2B1	ATPase plasma membrane Ca2+ transporting 1	0.994633	-0.00114196	0.323062	0.126847	0.103247	-0.261209
TRPM5	transient receptor potential cation channel subfamily M member 5	nan	0.993305	nan	-0.279154	nan	1.92811
NCK2	NCK adaptor protein 2	0.991483	0.00834538	0.0257696	-0.291732	0.0539923	-0.222985
MAP4K4	mitogen-activated protein kinase kinase kinase kinase 4	0.701836	0.0617482	0.512098	-0.115597	3.61671e-05	-0.299098
MGAT4A	mannosyl (alpha-1,3-)-glycoprotein beta-1,4-N-acetylglucosaminyltransferase, isozyme A	0.733702	-0.230711	0.0268558	-0.832525	0.154576	0.444846
RPL31	ribosomal protein L31	0.618045	-0.0667735	0.707947	-0.102819	1.39353e-10	0.413031
WDR1	WD repeat domain 1	0.932961	0.0274425	0.0208873	0.183121	0.568294	-0.0841435
SNX13	sorting nexin 13	0.556982	-0.230686	0.614281	-0.207916	0.350428	-0.262929
ARHGAP10	Rho GTPase activating protein 10	0.979969	-0.00820854	0.00373848	0.642005	0.0051902	-0.802651
RPS6KA2	ribosomal protein S6 kinase A2	0.491687	-0.141238	0.138459	0.155452	0.00248733	-0.394028
ING3	inhibitor of growth family member 3	0.124776	-0.329365	1.10645e-06	-0.825476	1.23647e-07	-0.886281
VASH1	vasohibin 1	0.293517	0.187881	0.723419	0.0093793	2.51783e-05	-0.514195
LMCD1	LIM and cysteine rich domains 1	0.912727	-0.0377686	0.0511817	-0.405748	0.000862329	0.505781
BUD23	BUD23, rRNA methyltransferase and ribosome maturation factor	0.124901	-0.20861	0.772591	-0.100085	2.67071e-06	-0.490354
SEL1L	SEL1L ERAD E3 ligase adaptor subunit	0.676475	-0.135177	0.584644	0.0708835	0.351164	0.16183
TRIP13	thyroid hormone receptor interactor 13	0.973381	-0.0138576	0.169521	-0.364868	0.921706	0.0182381
ATP6AP1	ATPase H+ transporting accessory protein 1	0.949494	0.0211675	0.000848751	0.242988	0.0012696	-0.312619
TCF3	transcription factor 3	0.646643	0.0819149	0.0354665	-0.230535	0.1741	0.106934
TRIB2	tribbles pseudokinase 2	3.92392e-10	-0.770318	1.14909e-33	-1.54905	9.00082e-31	-1.51854
DAZAP1	DAZ associated protein 1	0.00236043	-0.35849	1.18447e-11	-0.736911	0.54221	0.0598341
MBD3	methyl-CpG binding domain protein 3	0.151268	0.191897	0.283162	0.0768977	0.00576039	-0.286679
HLTF	helicase like transcription factor	0.852982	-0.0525869	0.420526	-0.182439	0.0245399	-0.337914
FAM50A	family with sequence similarity 50 member A	0.713441	0.0746585	0.182311	0.0891182	0.0609102	-0.202578
FAM3A	family with sequence similarity 3 member A	0.993628	0.0101716	0.414969	0.112317	0.668848	-0.102921
CPSF1	cleavage and polyadenylation specific factor 1	0.951691	-0.0186989	0.548868	0.0789665	0.248118	0.181495
MYO3B	myosin IIIB	nan	0.576029	nan	-inf	nan	0.115477
CYBRD1	cytochrome b reductase 1	0.998798	0.00260252	5.80798e-06	0.973611	0.0500987	-0.616257
CDH19	cadherin 19	nan	inf	nan	inf	nan	-inf
PDCD2	programmed cell death 2	0.504849	-0.086229	0.00100755	-0.311256	2.54072e-05	0.304926
SLC6A15	solute carrier family 6 member 15	0.56674	-0.203855	0.00557593	-0.607231	0.550956	0.127102
RDH11	retinol dehydrogenase 11 (all-trans/9-cis/11-cis)	1.50219e-05	0.357138	0.29852	-0.15909	0.00586674	-0.247925
PRKACA	protein kinase cAMP-activated catalytic subunit alpha	0.185352	-0.15207	0.000159595	-0.369971	2.80346e-06	-0.418187
ADGRL1	adhesion G protein-coupled receptor L1	1.34984e-05	-0.372717	0.650762	-0.106174	3.50247e-08	-0.460406
ACTN1	actinin alpha 1	0.9922	0.00233854	0.993573	-0.0451478	0.426181	-0.108386
ZFYVE26	zinc finger FYVE-type containing 26	0.896065	-0.130949	0.269244	0.377129	0.566014	-0.28703
RPS6KA6	ribosomal protein S6 kinase A6	0.946079	-0.0402981	0.338705	0.186877	0.932593	0.0052502
EPN2	epsin 2	0.49658	-0.180843	0.396802	-0.222105	0.560389	-0.12505
PTPN18	protein tyrosine phosphatase, non-receptor type 18	0.838146	0.0787155	0.404459	-0.207331	0.00176237	0.390897
LIMS2	LIM zinc finger domain containing 2	0.843547	0.313645	0.347998	0.64199	0.617311	-0.505278
ASIC4	acid sensing ion channel subunit family member 4	0.00142011	1.04987	0.00011031	1.04174	8.62494e-05	1.10708
SPEG	SPEG complex locus	0.00247355	0.43145	1.22994e-10	0.69152	0.990249	-0.0212868
LNX1	ligand of numb-protein X 1	nan	-1.17959	nan	-0.867082	0.213702	-2.05741
ALDH3A2	aldehyde dehydrogenase 3 family member A2	0.969137	0.0215687	0.818465	-0.0913823	0.125475	-0.229396
TFRC	transferrin receptor	0.018308	-0.305955	6.24411e-16	-0.905393	5.77731e-05	-0.460764
SREBF1	sterol regulatory element binding transcription factor 1	0.0060232	0.347913	0.963091	-0.0596968	6.54354e-09	-0.676825
TRPC5	transient receptor potential cation channel subfamily C member 5	nan	-inf	nan	-inf	nan	-inf
AFF4	AF4/FMR2 family member 4	0.989276	0.00279271	0.0718049	0.124443	2.8374e-06	-0.444419
UBE2D1	ubiquitin conjugating enzyme E2 D1	0.568882	-0.13306	2.90417e-05	-0.565039	0.647041	-0.0919496
MPP5	membrane palmitoylated protein 5	0.207632	0.355002	0.878622	-0.105886	0.356039	0.208834
RHOBTB1	Rho related BTB domain containing 1	0.0178419	0.384924	0.453045	-0.182845	0.000307387	-0.5479
SMC1A	structural maintenance of chromosomes 1A	0.822207	-0.0582253	0.239374	-0.206827	0.999116	-0.0133162
HSD17B10	hydroxysteroid 17-beta dehydrogenase 10	0.304366	-0.137121	0.00807866	-0.306228	5.03163e-25	-0.897511
MARK2	microtubule affinity regulating kinase 2	0.813048	0.0564418	0.011465	0.188244	8.66303e-07	-0.455708
HMMR	hyaluronan mediated motility receptor	0.559002	0.173232	8.95491e-08	-0.890517	2.16604e-15	1.04129
CHFR	checkpoint with forkhead and ring finger domains	0.0405602	0.39843	0.49467	0.103702	0.0379167	-0.385116
TRHDE	thyrotropin releasing hormone degrading enzyme	nan	inf	nan	inf	nan	inf
P4HA2	prolyl 4-hydroxylase subunit alpha 2	0.60417	-0.139517	0.913386	-0.0772391	0.583719	-0.111082
FCGR2B	Fc fragment of IgG receptor IIb	nan	-inf	nan	inf	nan	-inf
NFATC3	nuclear factor of activated T-cells 3	0.74053	-0.144369	0.636613	-0.186358	0.534883	0.159658
TRNT1	tRNA nucleotidyl transferase 1	0.81887	-0.122982	0.920592	-0.0935798	0.302336	-0.303702
ACADVL	acyl-CoA dehydrogenase, very long chain	0.962685	0.0195484	7.36501e-07	0.238464	0.00840161	0.15129
STK10	serine/threonine kinase 10	0.505538	0.259429	0.330607	0.224202	0.185524	-0.350277
FBXW11	F-box and WD repeat domain containing 11	0.423399	-0.134599	0.878204	-0.0779532	0.0213107	-0.271999
ACAP1	ArfGAP with coiled-coil, ankyrin repeat and PH domains 1	0.280964	-0.430366	0.00196458	0.672293	0.00219745	0.687562
CRMP1	collapsin response mediator protein 1	0.906028	0.0250344	9.90721e-57	-1.06366	0.000574736	-0.248986
EVC	EvC ciliary complex subunit 1	0.951869	-0.0964045	0.273325	-0.786929	0.722681	-0.270735
DERL2	derlin 2	0.911357	-0.0337226	0.614062	-0.151498	0.000435023	-0.472132
SIDT1	SID1 transmembrane family member 1	nan	-inf	nan	-0.295456	nan	0.127756
NDE1	nudE neurodevelopment protein 1	0.606417	0.240995	0.418626	0.197372	1.7346e-06	0.943604
MRVI1	murine retrovirus integration site 1 homolog	0.00576666	-2.42283	0.00993275	-1.82453	0.000240954	1.49237
TMEM38A	transmembrane protein 38A	0.723463	-0.166362	0.273451	-0.348493	0.026711	0.465443
AP1M1	adaptor related protein complex 1 mu 1 subunit	0.47606	0.121273	0.776703	-0.0837424	0.00880926	-0.259378
PVR	poliovirus receptor	0.981148	0.0195309	0.366342	-0.305144	8.85056e-06	-1.0938
XRCC1	X-ray repair cross complementing 1	0.992657	0.021978	0.148545	0.360629	0.302425	0.280229
SCARB1	scavenger receptor class B member 1	0.819766	0.0910116	0.33816	0.135796	0.232647	0.191229
CYP2W1	cytochrome P450 family 2 subfamily W member 1	nan	-0.0133584	0.448815	1.17214	0.0432756	2.11343
MCM2	minichromosome maintenance complex component 2	0.759462	-0.110111	0.394934	-0.218874	0.216477	-0.244071
MOV10L1	Mov10 RISC complex RNA helicase like 1	0.642864	-0.659537	0.0130204	1.23377	0.80952	-0.255062
PANX2	pannexin 2	0.608192	0.237759	0.00725051	0.575307	0.00403107	-0.810861
SELENOO	selenoprotein O	0.957254	0.034725	0.0172916	0.357962	4.71637e-05	0.619018
TP63	tumor protein p63	nan	inf	nan	-inf	nan	inf
ALPK1	alpha kinase 1	0.811437	0.298596	0.0314632	0.894541	0.815815	-0.176603
LLGL2	LLGL2, scribble cell polarity complex component	0.305085	0.366652	0.0144802	0.521999	0.625933	0.14466
PDE8A	phosphodiesterase 8A	0.468688	-0.247239	0.0358578	-0.509384	0.62855	-0.142521
CLCN4	chloride voltage-gated channel 4	0.00383804	-0.536405	0.0187259	-0.455451	2.13695e-07	-0.86181
NLE1	notchless homolog 1	0.690133	-0.183797	0.703935	-0.175252	0.000873347	0.678553
SDHA	succinate dehydrogenase complex flavoprotein subunit A	0.824445	-0.0683932	0.813503	-0.103128	0.00206195	0.404829
SMARCE1	SWI/SNF related, matrix associated, actin dependent regulator of chromatin, subfamily e, member 1	0.656289	0.0797825	0.124592	-0.195983	0.321484	-0.108178
GSDMB	gasdermin B	0.732375	0.313578	0.0465661	0.730735	6.63197e-06	1.46261
KDM5A	lysine demethylase 5A	0.188046	0.29949	4.16394e-06	0.629372	0.442984	-0.176619
ADAM11	ADAM metallopeptidase domain 11	0.698696	0.257235	0.547282	0.195335	0.389803	0.282244
PPP2R3A	protein phosphatase 2 regulatory subunit B''alpha	0.430041	0.367258	0.115635	0.445152	0.077331	0.502543
FERMT2	fermitin family member 2	0.000520117	-0.386891	0.149943	-0.208834	0.0148321	-0.276653
IGF2BP2	insulin like growth factor 2 mRNA binding protein 2	nan	-0.707888	0.208679	-1.66502	0.518991	0.586328
MAP3K13	mitogen-activated protein kinase kinase kinase 13	0.952737	0.0205058	0.79615	-0.00988151	0.952528	-0.0124213
ST6GAL1	ST6 beta-galactoside alpha-2,6-sialyltransferase 1	0.0118405	0.616189	0.133957	0.318021	0.00777131	-0.690402
TBX21	T-box 21	nan	-0.0133584	nan	-2.30212	nan	0.438121
VDAC1P1	voltage dependent anion channel 1 pseudogene 1	nan	-2.32726	nan	-0.0214531	nan	-0.205632
FRY	FRY microtubule binding protein	0.98931	-0.000148067	0.572743	0.125013	0.286104	-0.330318
PICALM	phosphatidylinositol binding clathrin assembly protein	0.836765	0.0619413	0.455787	0.0595751	0.683576	0.047295
NSF	N-ethylmaleimide sensitive factor, vesicle fusing ATPase	0.551814	-0.139662	0.642719	-0.127087	0.126134	-0.235426
GLI2	GLI family zinc finger 2	0.799765	0.26747	0.973238	-0.0726354	0.371862	-0.607582
CLASP1	cytoplasmic linker associated protein 1	0.759578	-0.0922369	0.927958	-0.0749524	0.552315	-0.1176
MRPS34	mitochondrial ribosomal protein S34	0.0106553	-0.247797	0.0800541	-0.224221	0.0237569	-0.216716
NOTCH3	notch 3	0.983398	-0.00270353	0.00210382	0.273781	0.00073583	0.32061
CLNS1A	chloride nucleotide-sensitive channel 1A	0.604666	-0.0653147	0.0297547	-0.218682	1.14471e-14	0.496323
GUCA1A	guanylate cyclase activator 1A	4.56027e-41	-5.38492	3.9727e-46	-5.88264	0.200057	0.263141
TEAD2	TEA domain transcription factor 2	0.962685	-0.010608	0.0993537	-0.23797	1.50483e-14	-0.793363
EED	embryonic ectoderm development	0.972193	0.0238805	0.742239	0.0276683	0.574021	0.103085
CDHR2	cadherin related family member 2	0.0563905	-0.317035	0.00384891	-0.44423	0.415673	-0.149662
SNCB	synuclein beta	0.00313702	-1.0081	0.00495264	-0.902053	0.0821268	-0.552326
TSG101	tumor susceptibility 101	0.870345	-0.0238222	0.974903	-0.0579476	0.867656	-0.0294957
NCBP3	nuclear cap binding subunit 3	0.844305	0.0728302	0.767434	0.0211303	0.0270056	-0.362203
ATP2A3	ATPase sarcoplasmic/endoplasmic reticulum Ca2+ transporting 3	0.749511	0.220631	0.713413	-0.2233	0.591925	-0.252358
CA12	carbonic anhydrase 12	0.0005383	-0.739525	6.11864e-08	0.842927	6.17313e-10	-1.25729
MGLL	monoglyceride lipase	0.998798	-0.00826359	0.0594686	0.427997	0.0363749	-0.607491
NTN4	netrin 4	0.0833644	0.479507	2.2601e-05	0.804376	7.41885e-05	-1.02222
BCS1L	BCS1 homolog, ubiquinol-cytochrome c reductase complex chaperone	0.206918	-0.270083	0.360553	-0.220947	0.0627451	-0.324851
NUAK1	NUAK family kinase 1	0.92359	-0.118459	0.0360398	0.865937	0.0710573	-1.07058
DPP8	dipeptidyl peptidase 8	0.726401	0.111945	0.700913	0.0416583	0.531935	-0.116927
SLC24A1	solute carrier family 24 member 1	0.876402	-0.239932	0.852384	0.0898988	0.490884	-0.550832
ZNF532	zinc finger protein 532	0.284388	-0.336369	7.75911e-25	-2.91834	0.644542	-0.129025
SCARF1	scavenger receptor class F member 1	nan	-1.23514	nan	0.367637	0.721744	0.47834
LMAN1	lectin, mannose binding 1	0.0164174	-0.31288	0.965155	-0.0503309	5.69597e-13	0.707099
HACD3	3-hydroxyacyl-CoA dehydratase 3	0.84799	-0.0440806	0.301129	-0.166848	0.153691	-0.164338
IPCEF1	interaction protein for cytohesin exchange factors 1	nan	-inf	nan	-inf	nan	inf
ZZEF1	zinc finger ZZ-type and EF-hand domain containing 1	0.769893	0.171854	0.721744	0.0633601	0.394962	0.222754
NOX3	NADPH oxidase 3	nan	-inf	nan	inf	nan	-inf
ENO1	enolase 1	1.85156e-11	-0.340966	2.40006e-69	-0.899796	1.14378e-69	-0.880821
SLC12A1	solute carrier family 12 member 1	nan	-1.58496	nan	-0.284568	nan	-0.469485
MYDGF	myeloid derived growth factor	0.000484371	-0.283645	0.0116283	0.147079	0.00632961	-0.230183
ANO8	anoctamin 8	0.631953	0.144726	0.332459	0.123603	0.698002	-0.0955168
TUBE1	tubulin epsilon 1	0.756474	-0.165419	0.0971718	-0.526832	0.452262	-0.252243
ARHGEF10L	Rho guanine nucleotide exchange factor 10 like	0.0525366	0.461563	0.0133338	0.434945	0.00670353	-0.605208
TXK	TXK tyrosine kinase	0.298189	-0.677041	0.000362117	-1.84525	0.000324875	-1.83755
WSCD2	WSC domain containing 2	nan	-1.88583	nan	-inf	0.642393	0.466249
KCNQ2	potassium voltage-gated channel subfamily Q member 2	2.16147e-07	-0.349828	8.73467e-46	-0.941786	5.52462e-07	0.300837
TACR2	tachykinin receptor 2	nan	-inf	nan	inf	nan	inf
ACTR6	ARP6 actin-related protein 6 homolog	0.599973	0.165287	0.834181	0.00945334	2.45522e-06	0.639189
TIPIN	TIMELESS interacting protein	0.839672	-0.107713	0.0410608	-0.605991	0.166532	-0.397574
SRI	sorcin	0.924207	-0.0032508	7.82044e-06	-0.378726	9.46704e-05	-0.297027
EIF4G3	eukaryotic translation initiation factor 4 gamma 3	0.618628	0.130429	0.815577	-0.0922051	0.556785	-0.106831
NUP37	nucleoporin 37	0.905488	-0.0412927	0.698361	-0.154612	0.00920804	0.493033
SEMA3A	semaphorin 3A	8.11204e-05	0.599489	0.291594	-0.25666	2.88004e-14	-1.30491
GTSE1	G2 and S-phase expressed 1	0.81054	0.111594	0.00856591	-0.552336	7.79836e-07	0.774719
SEMA3C	semaphorin 3C	6.41403e-08	-0.595543	0.0290132	-0.300886	0.409549	0.0924662
TTC38	tetratricopeptide repeat domain 38	0.606711	-0.167952	0.402922	0.13321	0.438472	-0.184541
ACAT1	acetyl-CoA acetyltransferase 1	0.377383	-0.147546	0.462829	-0.162042	0.100509	-0.20354
GRAMD4	GRAM domain containing 4	0.974028	-0.0127949	0.734624	-0.145731	0.00220162	-0.588571
CELSR1	cadherin EGF LAG seven-pass G-type receptor 1	0.190383	0.888767	0.830257	-0.235006	0.45788	0.46826
WNT8B	Wnt family member 8B	nan	inf	nan	inf	nan	-inf
ZNF638	zinc finger protein 638	0.812862	-0.095763	0.944156	-0.0724989	0.291647	-0.229727
SLC25A40	solute carrier family 25 member 40	0.903885	-0.0504862	0.00475223	-0.547925	0.166991	0.244289
TIMM21	translocase of inner mitochondrial membrane 21	0.534593	-0.214339	0.569556	-0.202144	0.0191069	-0.484458
ADD2	adducin 2	0.495123	-0.146655	0.000506268	-0.490452	0.966075	-0.0090771
RASAL2	RAS protein activator like 2	0.653892	0.252309	0.142945	0.397585	0.758256	0.102593
VPS9D1	VPS9 domain containing 1	0.894044	0.0817058	0.0306545	0.379198	0.489892	-0.184986
ZNF37A	zinc finger protein 37A	0.461139	0.252633	0.04376	0.360354	0.199938	-0.311075
MARK3	microtubule affinity regulating kinase 3	0.933418	-0.0201548	0.904468	-0.0800901	0.879039	0.00843322
SLC25A3	solute carrier family 25 member 3	0.740532	0.0491919	0.00142929	-0.224295	7.00807e-26	0.495388
FNDC3B	fibronectin type III domain containing 3B	0.946634	-0.0205469	0.0509465	0.295489	0.00517135	-0.505119
FOSL2	FOS like 2, AP-1 transcription factor subunit	0.232045	-0.361242	0.818436	0.0193744	0.00151336	-0.715057
CACNG5	calcium voltage-gated channel auxiliary subunit gamma 5	nan	-inf	nan	-inf	nan	-inf
CACNG4	calcium voltage-gated channel auxiliary subunit gamma 4	0.990272	0.0102715	2.20112e-18	-1.10684	0.00144845	-0.41933
FRYL	FRY like transcription coactivator	0.924712	-0.0703025	0.309543	0.199826	0.0535578	0.374603
TMEM131	transmembrane protein 131	0.769893	-0.14312	0.379703	0.190751	0.636298	-0.142015
FSCN1	fascin actin-bundling protein 1	0.0784179	-0.1275	1.36155e-33	-0.686296	1.7087e-06	-0.280008
ACTB	actin beta	0.992657	0.00361334	5.433e-10	-0.34161	1.28975e-46	-0.665531
MOCOS	molybdenum cofactor sulfurase	0.924137	-0.201079	0.260836	0.716159	0.962713	-0.0752286
PLD1	phospholipase D1	0.170956	-0.710805	0.00182279	0.908844	0.301832	0.380356
ATP12A	ATPase H+/K+ transporting non-gastric alpha2 subunit	nan	-inf	nan	-inf	nan	inf
WDR62	WD repeat domain 62	0.997344	0.00843958	0.935451	-0.00691339	0.345046	0.322304
DLG1	discs large MAGUK scaffold protein 1	0.951869	0.0287593	0.121852	0.203431	0.279698	0.159679
RAB7A	RAB7A, member RAS oncogene family	0.730117	0.0543214	0.926587	-0.0363431	1.45402e-14	-0.487285
BCAP29	B-cell receptor associated protein 29	0.586309	0.12722	0.46147	-0.164001	0.0123468	-0.324758
SEC31B	SEC31 homolog B, COPII coat complex component	0.278767	0.622584	0.535798	0.285358	0.386065	0.372613
SART3	squamous cell carcinoma antigen recognized by T-cells 3	0.858656	-0.0660914	0.662231	-0.154097	0.701079	0.063129
ARHGAP15	Rho GTPase activating protein 15	nan	0	nan	-1.29546	nan	0.115477
TUBA3D	tubulin alpha 3d	nan	0	nan	-inf	nan	0.127756
PAX2	paired box 2	nan	-0.596103	0.579918	-1.28901	0.0597096	1.70146
EXOSC7	exosome component 7	0.926894	0.0476573	0.562978	0.0593802	0.00400541	0.370024
KIFAP3	kinesin associated protein 3	0.278825	0.197485	0.73952	0.0170941	0.0200525	0.274479
MKRN2	makorin ring finger protein 2	0.860295	0.0493553	0.250677	-0.183111	0.0279284	0.211843
MCM6	minichromosome maintenance complex component 6	0.129107	-0.275397	0.0515999	-0.339794	0.00107155	-0.471358
REXO2	RNA exonuclease 2	2.42344e-05	-0.384707	0.104328	0.109664	1.91671e-11	-0.600014
RBM7	RNA binding motif protein 7	0.623956	-0.162231	0.788721	-0.121019	0.133953	-0.312801
RBMS2	RNA binding motif single stranded interacting protein 2	0.920031	0.0667378	0.275018	0.234025	0.992425	-0.0149544
BAZ2A	bromodomain adjacent to zinc finger domain 2A	0.216246	0.213866	0.00244532	0.301557	0.0248528	0.261071
PTPN23	protein tyrosine phosphatase, non-receptor type 23	0.147716	0.278917	0.0107973	0.312772	0.00382684	0.377359
MLH1	mutL homolog 1	0.553993	0.174165	0.744395	0.0356169	0.991398	-0.00886263
UNG	uracil DNA glycosylase	0.954975	0.0317279	0.634294	0.0493256	0.000498404	-0.560334
FMO4	flavin containing monooxygenase 4	nan	-1.32726	nan	-0.606416	nan	-0.622717
KLHL20	kelch like family member 20	0.997217	0.0208777	0.548832	0.101239	1.86067e-05	-0.853919
RGS11	regulator of G protein signaling 11	0.00115186	0.895204	0.00356155	0.684519	0.275222	-0.383528
SLC46A1	solute carrier family 46 member 1	0.951691	0.0702351	0.51726	0.19361	0.183895	-0.474955
PLXNA2	plexin A2	0.0159495	0.607569	1.80031e-13	1.31335	0.56519	-0.183945
SPAG5	sperm associated antigen 5	0.283622	0.244785	0.0112959	-0.462862	3.65057e-12	0.886532
ANKRD13A	ankyrin repeat domain 13A	0.97541	-0.00824399	0.0894711	0.364131	0.292278	-0.286049
TPD52	tumor protein D52	0.253579	0.267516	0.0932188	-0.350982	0.00354317	0.445833
ACACB	acetyl-CoA carboxylase beta	0.470275	-0.244703	0.342513	-0.289575	0.694828	0.0830875
TRAF4	TNF receptor associated factor 4	0.824987	-0.183722	0.0642725	-0.717501	0.000152259	-1.33152
PAG1	phosphoprotein membrane anchor with glycosphingolipid microdomains 1	0.885839	-0.0522646	6.59408e-17	0.981479	9.44923e-17	-1.41248
GPATCH1	G-patch domain containing 1	0.860295	-0.154395	0.884683	-0.151183	0.267001	-0.476592
NT5C2	5'-nucleotidase, cytosolic II	0.961047	-0.145283	0.944863	0.0640249	0.0011924	2.01627
MCAM	melanoma cell adhesion molecule	0.905061	-0.0331586	0.829952	0.00798299	0.0921233	-0.260068
GPC4	glypican 4	0.436786	-0.409528	0.387338	0.24869	0.149928	-0.525034
MBNL3	muscleblind like splicing regulator 3	0.933124	0.0912644	0.863256	0.0782529	0.0078961	-1.36884
CAMSAP3	calmodulin regulated spectrin associated protein family member 3	0.759384	0.165113	0.776369	0.0501518	0.413328	0.213597
RAP1GAP	RAP1 GTPase activating protein	0.0361342	-0.506169	0.523241	-0.212798	0.611355	0.105737
XAB2	XPA binding protein 2	0.920008	0.0767438	0.696468	0.0912204	0.00130235	0.675627
ARHGEF1	Rho guanine nucleotide exchange factor 1	0.961135	0.0398388	0.999287	-0.0227631	0.128659	-0.296853
STXBP2	syntaxin binding protein 2	0.149062	0.728581	0.52462	-0.401688	0.0539895	0.729842
MAP2K7	mitogen-activated protein kinase kinase 7	0.29925	0.212739	0.601796	0.0534237	0.0688723	0.234024
NMRK2	nicotinamide riboside kinase 2	nan	0.865157	0.926001	0.131438	0.700009	0.532221
DGKD	diacylglycerol kinase delta	0.879886	-0.05951	0.0789007	0.252422	0.920593	0.00442282
CTTNBP2	cortactin binding protein 2	nan	-inf	nan	-inf	nan	inf
ACTL6B	actin like 6B	1.84799e-07	-0.735027	3.73475e-09	-0.837411	2.71028e-12	-0.993756
RARB	retinoic acid receptor beta	0.576132	0.102967	3.34461e-06	-0.45874	2.29192e-29	0.871847
TOP2B	topoisomerase (DNA) II beta	0.761742	0.0736962	0.245699	-0.185027	0.97134	-0.0175047
TM9SF3	transmembrane 9 superfamily member 3	0.932518	-0.0107708	0.641419	0.0111493	0.949688	-0.0137519
NFKB2	nuclear factor kappa B subunit 2	0.00147118	-0.633815	0.21695	0.196331	2.69768e-19	1.23455
UBE2T	ubiquitin conjugating enzyme E2 T	0.255728	-0.111574	3.13985e-37	-0.881739	2.27799e-20	0.556897
PPP1R12B	protein phosphatase 1 regulatory subunit 12B	0.898266	-0.0733613	0.0710309	-0.589968	0.150622	0.404712
DNAJC10	DnaJ heat shock protein family (Hsp40) member C10	0.992657	0.016886	9.56603e-06	0.424947	0.0428422	-0.262659
GTF3C1	general transcription factor IIIC subunit 1	0.966851	0.0240755	0.59922	0.0553845	0.834824	-0.0566765
IL4R	interleukin 4 receptor	0.612782	-0.248327	0.63095	0.131028	1.85302e-05	-1.25382
USP33	ubiquitin specific peptidase 33	0.84582	0.0741718	0.730794	0.00990784	0.647295	-0.0865349
PAK3	p21 (RAC1) activated kinase 3	0.923359	-0.0629589	0.467096	-0.263952	0.906466	0.00544367
CAPN6	calpain 6	7.75613e-08	-1.72303	2.24894e-09	-1.84962	0.0142825	-0.728869
DCX	doublecortin	9.42439e-34	-1.14727	1.18503e-72	-1.8035	8.54991e-15	-0.739925
SNRPA	small nuclear ribonucleoprotein polypeptide A	0.0430968	-0.269573	1.14222e-09	-0.675713	1.02155e-14	0.700756
SPAG6	sperm associated antigen 6	0.748267	0.207291	0.0146653	0.652415	0.420741	0.264228
EXOSC5	exosome component 5	0.595886	-0.200116	0.303419	-0.323926	0.240393	0.256053
DYNC1I2	dynein cytoplasmic 1 intermediate chain 2	0.27737	0.233566	0.882602	-0.0728523	0.000533488	-0.492534
LRCH4	leucine rich repeats and calponin homology domain containing 4	0.345464	0.216793	0.590696	0.0526687	1.61454e-07	0.643312
FAM76B	family with sequence similarity 76 member B	0.918342	-0.0371714	0.762607	-0.132025	0.729879	0.0939552
SIRT6	sirtuin 6	0.57111	-0.137858	0.688051	-0.131125	4.11144e-05	-0.567127
POLD3	DNA polymerase delta 3, accessory subunit	0.654836	-0.256177	0.901726	0.00210254	0.424489	0.261436
ACTN2	actinin alpha 2	0.759578	-0.440925	0.683817	-0.394787	0.424489	0.491195
CAPZB	capping actin protein of muscle Z-line beta subunit	0.138711	-0.132971	5.96448e-08	-0.416201	9.66734e-05	-0.288936
GPR137B	G protein-coupled receptor 137B	0.941268	0.0601078	0.246106	0.268623	0.56679	-0.204787
NAALAD2	N-acetylated alpha-linked acidic dipeptidase 2	0.1278	0.398425	0.000212018	0.622442	0.0243195	-0.512149
JADE1	jade family PHD finger 1	0.832561	0.113884	0.956965	-0.032213	0.231019	0.251544
SLC25A43	solute carrier family 25 member 43	nan	0.408343	nan	-inf	nan	0.859822
UBE2A	ubiquitin conjugating enzyme E2 A	0.963957	-0.0126262	0.261549	-0.200504	0.295607	-0.14775
FGFR1	fibroblast growth factor receptor 1	0.00983306	-0.283494	0.937762	-0.0268589	3.40149e-16	-0.799081
FKBP6	FK506 binding protein 6	nan	0	nan	-inf	nan	1.11548
SMC1B	structural maintenance of chromosomes 1B	nan	-1	nan	-1.29546	nan	-0.872244
FBLN1	fibulin 1	0.643136	-0.0608089	0.00387286	-0.265611	0.00058326	0.219962
ITGA8	integrin subunit alpha 8	nan	0	nan	-inf	nan	-inf
MAP2	microtubule associated protein 2	2.66756e-08	-0.544867	1.34836e-13	-0.733599	7.2752e-07	-0.495055
PIAS2	protein inhibitor of activated STAT 2	0.901588	-0.0406686	0.494637	-0.203844	0.242833	-0.25149
AMPH	amphiphysin	2.548e-07	3.52611	0.897683	-0.287733	0.815044	0.377283
ARAF	A-Raf proto-oncogene, serine/threonine kinase	0.9922	-0.00376432	0.382714	-0.239452	0.595808	-0.134299
MCCC1	methylcrotonoyl-CoA carboxylase 1	0.681273	0.182649	0.228414	-0.375322	0.224659	-0.316376
LAMP3	lysosomal associated membrane protein 3	nan	0.45123	0.590976	-0.963807	0.161311	1.28754
FAP	fibroblast activation protein alpha	0.991155	-0.00890555	7.94636e-08	2.65359	0.0251021	1.48543
NEBL	nebulette	0.234275	-0.217958	1.76132e-15	-1.03239	0.0152074	-0.331476
ACER3	alkaline ceramidase 3	0.60202	-0.13981	0.0774703	-0.354844	0.0088283	-0.426072
UBE2K	ubiquitin conjugating enzyme E2 K	0.851032	-0.0338827	0.00552034	-0.341198	0.259336	-0.139249
PIK3C3	phosphatidylinositol 3-kinase catalytic subunit type 3	0.702969	0.137294	0.124953	0.214068	0.0856636	-0.311112
N4BP2	NEDD4 binding protein 2	0.84709	0.147142	0.654042	-0.226623	0.987751	-0.0180952
TIGAR	TP53 induced glycolysis regulatory phosphatase	0.654319	-0.161741	0.00680123	-0.581142	2.93774e-07	-1.01139
TULP3	tubby like protein 3	0.431896	0.198148	0.641807	0.0471628	0.921706	-0.0417968
SYNJ2	synaptojanin 2	0.980772	0.0412358	0.288525	0.355737	0.111389	-0.637017
ADCY2	adenylate cyclase 2	nan	1.99331	nan	-0.295456	nan	-inf
PPP2R5C	protein phosphatase 2 regulatory subunit B'gamma	0.133088	-0.132322	0.458527	-0.105086	0.212077	-0.106186
PMS2P1	PMS1 homolog 2, mismatch repair system component pseudogene 1	0.833301	-0.150889	0.868138	0.0343847	0.810307	0.116779
RBFOX1	RNA binding protein, fox-1 homolog 1	nan	-inf	nan	inf	nan	inf
GNB1	G protein subunit beta 1	0.751509	0.0429525	5.34717e-05	-0.25253	5.29002e-07	-0.267537
HOXA9	homeobox A9	nan	-inf	nan	-inf	nan	-inf
EDN1	endothelin 1	nan	0.408343	nan	-1.88042	nan	0.536667
MLLT10	myeloid/lymphoid or mixed-lineage leukemia; translocated to, 10	0.967124	-0.0173179	0.456512	-0.209867	0.0680672	0.309627
ZCWPW1	zinc finger CW-type and PWWP domain containing 1	0.84709	0.328363	0.355787	0.63773	0.479012	0.512609
ADCYAP1R1	ADCYAP receptor type I	0.49209	0.2957	0.913386	-0.0846895	0.191841	-0.377262
FGF20	fibroblast growth factor 20	nan	1.25324	0.659049	0.715513	0.692999	0.600846
P2RY10	purinergic receptor P2Y10	nan	-inf	nan	inf	nan	-inf
ITM2A	integral membrane protein 2A	0.0733543	0.795468	0.0236936	-1.11128	0.131113	0.583831
NRDC	nardilysin convertase	5.77749e-05	0.418958	0.0207344	0.207382	2.58852e-07	0.469445
VDAC3	voltage dependent anion channel 3	0.975601	0.000894217	0.000114426	-0.369148	0.00205393	-0.274816
PCM1	pericentriolar material 1	0.0140001	0.31934	7.79627e-06	0.414775	0.789049	-0.0484592
TNRC6C	trinucleotide repeat containing 6C	0.39434	0.324457	0.0124941	0.543009	0.213908	-0.36175
CBFA2T2	CBFA2/RUNX1 translocation partner 2	0.940163	-0.0151272	0.379586	-0.187215	0.0178128	0.282401
COX17P1	COX17, cytochrome c oxidase copper chaperone pseudogene 1	1.09229e-84	-5.19289	5.81581e-93	-5.2834	0.590663	-0.111067
ITCH	itchy E3 ubiquitin protein ligase	0.641539	-0.307839	0.869339	-0.137194	0.966332	-0.0464256
PKD2L2	polycystin 2 like 2, transient receptor potential cation channel	nan	1.57603	nan	2.03953	nan	0.127756
TP53INP2	tumor protein p53 inducible nuclear protein 2	0.000615591	0.396402	0.480292	0.0529846	2.67703e-08	-0.629332
SDF4	stromal cell derived factor 4	0.150296	-0.151173	2.82389e-15	0.50883	3.4919e-06	-0.3844
MYH7B	myosin heavy chain 7B	0.751171	0.142464	0.543106	0.11874	0.691465	-0.121758
TP73	tumor protein p73	0.555759	0.576691	0.00212896	1.33481	0.0040934	1.30931
TOLLIP	toll interacting protein	0.864042	-0.0579433	0.575243	-0.150033	0.00192728	-0.415965
UBE2D4	ubiquitin conjugating enzyme E2 D4 (putative)	0.608745	-0.104763	0.0143632	-0.348228	0.0142105	-0.310491
CLUL1	clusterin like 1	0.532008	-0.423292	0.0567752	-0.879377	0.114967	0.599392
RUNX1T1	RUNX1 translocation partner 1	0.0247641	0.548093	0.00687828	0.511081	9.69288e-05	-0.926156
CDH17	cadherin 17	nan	-inf	nan	-inf	nan	1.11548
THOC1	THO complex 1	0.918338	0.0590383	0.962502	-0.0288785	0.955945	6.69573e-05
FKBP7	FK506 binding protein 7	0.244292	-0.148914	9.06258e-05	0.273459	1.70023e-05	0.340608
OSBPL6	oxysterol binding protein like 6	0.972146	0.0180349	0.812859	-0.132982	0.282571	0.276082
XRCC5	X-ray repair cross complementing 5	0.998798	0.00372641	0.000968098	-0.27435	0.48864	-0.0724078
SP140	SP140 nuclear body protein	nan	inf	nan	-inf	nan	inf
MKNK1	MAP kinase interacting serine/threonine kinase 1	0.922142	0.0611864	0.948264	-0.0242232	0.116677	0.327367
TNS1	tensin 1	0.988976	0.00502409	4.75933e-13	0.956106	0.0001632	-0.679227
REXO1	RNA exonuclease 1 homolog	0.873461	-0.0793463	0.903184	-0.0938361	0.635984	-0.137091
SAR1A	secretion associated Ras related GTPase 1A	0.000156392	-0.34046	0.0189359	-0.256162	0.939474	0.00607079
CDC14A	cell division cycle 14A	0.633046	0.601228	0.390681	0.63773	0.00351309	1.54083
RAPGEF3	Rap guanine nucleotide exchange factor 3	0.905796	0.255017	0.955596	0.0574716	0.60557	0.457492
CEACAM1	carcinoembryonic antigen related cell adhesion molecule 1	nan	-0.751232	nan	-1.60642	nan	-2.19951
SENP1	SUMO1/sentrin specific peptidase 1	0.94426	-0.0564263	0.845518	0.0203882	0.64742	-0.160328
DUSP13	dual specificity phosphatase 13	0.44919	0.884126	0.973383	-0.0923483	0.73596	0.308927
CIC	capicua transcriptional repressor	0.00370406	0.433223	0.000295626	0.422339	0.0057016	-0.432729
LIPE	lipase E, hormone sensitive type	0.899202	0.222889	0.674991	0.321696	0.883162	0.116814
FDFT1	farnesyl-diphosphate farnesyltransferase 1	1.61752e-168	1.33378	0.0119261	0.10026	2.3281e-13	0.370558
PAFAH1B3	platelet activating factor acetylhydrolase 1b catalytic subunit 3	0.51722	-0.0847919	0.00232677	-0.303349	2.21334e-09	-0.474156
OPHN1	oligophrenin 1	0.754303	0.370151	0.298103	0.564084	0.220862	-0.882338
KIF22	kinesin family member 22	0.868748	-0.0462746	2.8886e-05	-0.586071	6.25216e-06	0.514481
SCGN	secretagogin, EF-hand calcium binding protein	2.56038e-07	-1.01247	5.16632e-20	-1.88172	4.10065e-05	0.668993
CARMIL1	capping protein regulator and myosin 1 linker 1	0.0599004	-0.611186	0.727204	-0.172078	0.00157383	-0.873917
PGM1	phosphoglucomutase 1	0.858476	-0.0336608	0.15262	-0.206901	0.181162	0.135762
DDX1	DEAD-box helicase 1	0.514828	0.103402	0.204858	-0.173149	3.07163e-05	-0.35074
DNM2	dynamin 2	0.166864	0.205932	0.117246	0.136909	0.00217004	0.297412
EPB41L2	erythrocyte membrane protein band 4.1 like 2	0.681919	0.548973	0.967981	0.0217887	0.331045	0.730049
RIMS1	regulating synaptic membrane exocytosis 1	0.713948	-0.592596	0.672598	-0.50716	0.778867	-0.276035
MOXD1	monooxygenase DBH like 1	nan	inf	nan	inf	nan	inf
STX7	syntaxin 7	0.759384	-0.104311	0.234886	-0.279975	0.110854	0.270282
RABL2B	RAB, member of RAS oncogene family like 2B	0.731949	-0.167328	0.703882	0.0661089	0.813254	-0.0962658
KEAP1	kelch like ECH associated protein 1	0.518757	0.139504	0.0231654	0.224483	8.77015e-06	-0.553766
DDX43	DEAD-box helicase 43	nan	-inf	nan	-inf	nan	0.127756
PTPRH	protein tyrosine phosphatase, receptor type H	0.69472	0.247541	0.0918683	0.510652	0.638591	-0.21232
DCT	dopachrome tautomerase	0.761742	0.630643	0.000418016	2.21943	0.00125424	2.11798
SLC35C2	solute carrier family 35 member C2	0.290987	0.187605	0.100441	0.156561	0.230919	0.146186
CRYBG3	crystallin beta-gamma domain containing 3	nan	1.5805	nan	1.88897	0.672071	1.12163
EPHA6	EPH receptor A6	0.710142	-0.555816	0.0061338	-3.53129	0.0277372	1.26093
RFX3	regulatory factor X3	0.729048	0.170191	0.677873	0.0937476	2.82079e-06	0.893134
RIF1	replication timing regulatory factor 1	0.36029	0.279272	0.130922	0.275958	0.200759	0.263198
RAB21	RAB21, member RAS oncogene family	0.877023	-0.0322426	0.677145	0.036058	0.00063696	-0.419401
SLC4A4	solute carrier family 4 member 4	nan	inf	nan	-inf	nan	inf
SMARCA2	SWI/SNF related, matrix associated, actin dependent regulator of chromatin, subfamily a, member 2	0.573343	-0.188512	0.362238	-0.264788	0.00582997	-0.547577
RDH8	retinol dehydrogenase 8 (all-trans)	nan	-inf	nan	inf	nan	-inf
SESN1	sestrin 1	0.465923	0.225349	0.340208	0.167112	0.00256498	0.509348
MID2	midline 2	nan	0.993305	nan	-inf	nan	-0.872244
PIH1D3	PIH1 domain containing 3	nan	inf	nan	-inf	nan	-inf
COL5A3	collagen type V alpha 3 chain	nan	-inf	nan	-0.279154	nan	1.12163
SRCAP	Snf2 related CREBBP activator protein	0.631189	0.211881	0.74094	0.0785521	0.707956	0.0850088
PUM3	pumilio RNA binding family member 3	0.938308	0.0627828	0.923157	-0.0624215	0.128482	0.30248
CPB2	carboxypeptidase B2	nan	-inf	nan	-0.295456	nan	-inf
CHRNA3	cholinergic receptor nicotinic alpha 3 subunit	1.10856e-18	0.49698	0.821306	-0.0652044	1.11094e-24	-0.613374
KCNN2	potassium calcium-activated channel subfamily N member 2	nan	-inf	nan	-inf	nan	-0.622717
CNOT4	CCR4-NOT transcription complex subunit 4	0.841223	0.102244	0.298659	0.195708	0.942057	-0.0244586
PSEN1	presenilin 1	0.346036	0.180559	0.0499584	0.198186	0.0194154	0.265961
CPOX	coproporphyrinogen oxidase	0.864556	-0.0729504	0.32053	-0.278319	0.37251	0.189842
CLDND1	claudin domain containing 1	0.681287	0.0827063	0.00439215	-0.301647	0.00916683	0.211719
MOK	MOK protein kinase	0.705712	-0.386392	0.581633	0.288885	0.394097	-0.524075
HSP90AA1	heat shock protein 90 alpha family class A member 1	0.0427387	-0.162152	3.32156e-07	-0.382406	1.48591e-44	-0.872996
RBL1	RB transcriptional corepressor like 1	0.0453434	0.99141	0.0594425	0.766356	0.0264036	0.894402
DLGAP4	DLG associated protein 4	0.779849	0.0656719	0.210793	-0.201258	0.000112466	0.348899
IGSF9B	immunoglobulin superfamily member 9B	nan	-0.271353	0.91999	-0.20497	0.00956725	-4.04514
CROCCP3	ciliary rootlet coiled-coil, rootletin pseudogene 3	0.95719	-0.101798	0.418351	0.670137	0.947271	-0.0752286
NDC80	NDC80, kinetochore complex component	0.973276	-0.0222644	0.0149379	-0.532292	0.00473901	0.466588
AP4E1	adaptor related protein complex 4 epsilon 1 subunit	0.769893	-0.178205	0.986957	-0.0458184	0.44816	0.246656
RSBN1	round spermatid basic protein 1	0.847545	0.0961361	0.955547	-0.0652098	0.99049	-0.0116892
MAGI3	membrane associated guanylate kinase, WW and PDZ domain containing 3	0.495115	-0.203567	0.121499	-0.340991	0.970086	-0.0196911
CXCL2	C-X-C motif chemokine ligand 2	nan	-inf	nan	-inf	nan	inf
COL4A4	collagen type IV alpha 4 chain	nan	-1.49459	nan	-0.922198	0.102761	-2.10662
TCF7	transcription factor 7 (T-cell specific, HMG-box)	0.545235	-0.28691	0.936484	-0.00468639	0.677129	0.128004
OSTM1	osteopetrosis associated transmembrane protein 1	0.395327	-0.198933	0.243021	-0.253622	0.194978	-0.2281
CDH7	cadherin 7	0.96482	-0.0665558	0.586794	-0.839704	0.723221	-0.43905
IMPG2	interphotoreceptor matrix proteoglycan 2	nan	2.31657	nan	1.30039	nan	1.11548
PCNP	PEST proteolytic signal containing nuclear protein	0.170956	-0.154133	2.28209e-11	-0.600465	0.905964	-0.00178761
EXD2	exonuclease 3'-5' domain containing 2	0.279171	0.269459	0.91057	-0.0743885	0.18299	-0.263556
ARG2	arginase 2	0.903005	0.036508	0.967623	-0.0472859	0.489798	0.0593344
MEF2C	myocyte enhancer factor 2C	0.881597	-0.107735	0.53802	0.221014	0.0776373	-0.666544
PTPRC	protein tyrosine phosphatase, receptor type C	nan	-0.596103	nan	-inf	nan	-2.46165
CACNA1S	calcium voltage-gated channel subunit alpha1 S	nan	-inf	nan	inf	nan	inf
PKP1	plakophilin 1	nan	inf	nan	-inf	nan	-inf
UBA5	ubiquitin like modifier activating enzyme 5	0.838725	-0.0745324	0.70694	-0.146858	0.301514	-0.21303
STK17B	serine/threonine kinase 17b	0.0582441	-0.48393	1.82347e-08	-1.24672	0.820377	-0.060958
CDC14B	cell division cycle 14B	0.917792	0.0754252	0.959601	-0.0832345	0.725964	0.0807006
ZNF510	zinc finger protein 510	0.81796	0.184412	0.465422	0.242691	0.0401978	0.631685
LRP2	LDL receptor related protein 2	nan	inf	nan	-inf	nan	inf
ZNF506	zinc finger protein 506	0.735777	0.205882	0.754886	0.0900815	0.121513	0.417966
JMJD4	jumonji domain containing 4	0.895978	-0.0611922	0.340258	-0.284085	0.0149815	-0.518138
DUSP12	dual specificity phosphatase 12	0.518472	0.183263	0.440922	-0.193317	0.819431	-0.0536351
AACS	acetoacetyl-CoA synthetase	4.93969e-12	0.904064	0.240402	-0.259411	0.282379	-0.207529
KIAA0141	KIAA0141	0.586413	0.165671	0.435164	0.104639	0.534935	0.108913
SLC13A1	solute carrier family 13 member 1	nan	-inf	nan	inf	nan	inf
CADPS2	calcium dependent secretion activator 2	nan	0	nan	-inf	nan	0.127756
PCDHB4	protocadherin beta 4	0.760742	-0.313982	0.785747	-0.241105	0.0130409	-1.0603
PCDHA6	protocadherin alpha 6	nan	inf	nan	inf	nan	-inf
PCDHGA2	protocadherin gamma subfamily A, 2	nan	0.45123	nan	-2.28249	0.292134	-1.88786
HSPB11	heat shock protein family B (small) member 11	0.120433	-0.218286	0.0300094	-0.306697	0.0263835	-0.274765
PHLPP1	PH domain and leucine rich repeat protein phosphatase 1	0.636442	-0.257006	0.65176	-0.224986	0.054619	0.523098
ATP8B1	ATPase phospholipid transporting 8B1	0.88178	0.341675	0.0794617	1.3455	0.929616	0.118644
IL12RB2	interleukin 12 receptor subunit beta 2	nan	-0.430634	nan	-0.706269	nan	0.114966
SMARCD3	SWI/SNF related, matrix associated, actin dependent regulator of chromatin, subfamily d, member 3	0.738129	-0.0663483	0.0270869	0.179255	0.102361	-0.18804
WDR70	WD repeat domain 70	0.910063	0.0717826	0.99371	-0.0372058	0.239895	0.272828
FYB	FYN binding protein	nan	-inf	nan	-inf	nan	-inf
MPP4	membrane palmitoylated protein 4	nan	-0.797574	0.600372	-0.625484	0.239477	-1.13051
STRADB	STE20-related kinase adaptor beta	0.108337	-0.298764	0.0180112	-0.404572	0.741245	-0.0710971
BZW1	basic leucine zipper and W2 domains 1	0.450063	-0.116934	5.70519e-07	-0.50825	9.60883e-16	-0.777263
PGR	progesterone receptor	nan	-inf	nan	-inf	nan	-inf
C1QTNF3	C1q and TNF related 3	0.0561697	1.62088	0.00922682	1.71694	0.0209053	1.61298
ME2	malic enzyme 2	0.329203	-0.196604	0.490217	-0.172461	0.624273	0.0786497
C5orf22	chromosome 5 open reading frame 22	0.710142	0.159191	0.760405	-0.151605	0.0099029	0.469747
CCNT2	cyclin T2	0.84709	0.102185	0.982859	-0.0523179	0.906466	-0.0386706
FAM135A	family with sequence similarity 135 member A	0.447023	0.484265	0.59922	0.24264	0.550923	-0.339081
COL19A1	collagen type XIX alpha 1 chain	nan	0.476272	nan	-1.02687	0.774463	-0.622717
EPB41L3	erythrocyte membrane protein band 4.1 like 3	nan	-1.01338	nan	-2.88486	0.399192	0.991094
COBLL1	cordon-bleu WH2 repeat protein like 1	0.852027	0.227966	0.0512871	0.778644	0.467196	0.379969
DLG3	discs large MAGUK scaffold protein 3	0.835434	-0.17108	0.837048	-0.173082	0.129713	-0.652432
SERTAD4	SERTA domain containing 4	0.31686	0.463061	0.567099	0.199104	0.24396	-0.459734
TRAF5	TNF receptor associated factor 5	0.173786	0.418136	0.73952	0.0725899	0.456096	-0.226063
MRPL22	mitochondrial ribosomal protein L22	0.923791	0.0384409	0.451362	-0.186771	0.0153536	0.285257
GEMIN5	gem nuclear organelle associated protein 5	0.996309	0.0107264	0.988839	-0.0546786	0.0797604	0.440926
OPRK1	opioid receptor kappa 1	nan	inf	nan	-inf	nan	-inf
NFE2L1	nuclear factor, erythroid 2 like 1	0.00159435	0.254253	1.45968e-06	0.271072	2.75847e-07	-0.382456
SEMA5B	semaphorin 5B	0.981148	0.0482341	0.968254	0.026414	0.276564	0.682862
GSK3B	glycogen synthase kinase 3 beta	0.923791	0.0474534	0.552442	-0.146234	0.850256	0.0264375
ITGB5	integrin subunit beta 5	2.31383e-12	-0.518345	1.80803e-31	-0.874426	2.01545e-24	-0.761155
ERC1	ELKS/RAB6-interacting/CAST family member 1	0.735609	0.116135	0.00210984	0.437495	8.99078e-05	-0.675477
XPO1	exportin 1	0.810462	0.0726807	0.701552	0.0261471	0.000800151	0.362848
LINC01587	long intergenic non-protein coding RNA 1587	0.161951	0.816354	0.00925324	-1.71306	3.59182e-07	1.83312
RNF13	ring finger protein 13	0.380265	0.236743	0.112223	0.246834	0.835674	-0.0615147
TRPM3	transient receptor potential cation channel subfamily M member 3	nan	0.750022	0.246106	-1.66502	0.0616351	-3.57679
PALB2	partner and localizer of BRCA2	0.490382	0.472443	0.424224	0.35973	0.315763	0.438848
DOPEY1	dopey family member 1	0.859446	0.138935	0.529621	0.221123	0.419489	0.278236
LYRM2	LYR motif containing 2	0.300585	0.201211	0.666462	0.0226578	0.924685	-0.0434274
BCKDHB	branched chain keto acid dehydrogenase E1 subunit beta	0.631566	-0.158613	0.247458	0.166255	0.244217	-0.244978
KAT6A	lysine acetyltransferase 6A	0.895454	-0.0336287	0.555574	-0.144809	0.806246	0.0279167
ZCCHC6	zinc finger CCHC-type containing 6	0.656439	0.220345	0.465422	0.204554	0.516071	0.200752
ULK2	unc-51 like autophagy activating kinase 2	0.689445	0.170504	0.243964	-0.327695	6.86503e-08	0.880724
GRHL2	grainyhead like transcription factor 2	nan	0	nan	-1.29546	nan	-0.872244
TNPO1	transportin 1	0.939991	-0.00733521	0.122252	-0.213987	0.00340185	0.261464
PLOD1	procollagen-lysine,2-oxoglutarate 5-dioxygenase 1	0.00527265	-0.271783	7.82684e-09	0.398268	3.9775e-09	-0.519596
P2RX5	purinergic receptor P2X 5	0.412912	1.68966	0.0425677	2.23704	0.0246381	2.36128
ITGAE	integrin subunit alpha E	0.041174	-0.317689	0.000844088	-0.495651	0.000769791	-0.456432
DIS3	DIS3 homolog, exosome endoribonuclease and 3'-5' exoribonuclease	0.870106	0.066696	0.829943	0.0106989	3.70637e-09	0.662238
PIBF1	progesterone immunomodulatory binding factor 1	0.650683	0.21558	0.788721	0.0590511	0.117781	0.389777
TDRD3	tudor domain containing 3	0.812496	-0.119289	0.875391	0.0116557	4.94733e-05	0.797897
NUFIP1	NUFIP1, FMR1 interacting protein 1	0.613608	0.368117	0.000348195	1.06289	2.1368e-08	1.59691
PDS5B	PDS5 cohesin associated factor B	0.415046	-0.272622	0.387836	-0.271347	0.865871	-0.0442254
OXCT1	3-oxoacid CoA-transferase 1	0.248373	0.26333	0.073503	-0.390938	7.37536e-05	-0.69037
RRAGB	Ras related GTP binding B	0.560494	0.360924	0.166086	0.476623	0.605399	-0.245524
EPYC	epiphycan	nan	inf	nan	-inf	nan	inf
CYLD	CYLD lysine 63 deubiquitinase	0.972193	0.0282851	0.00600297	0.518109	0.674255	0.109704
SLC27A5	solute carrier family 27 member 5	0.972146	0.0122233	0.25206	0.177572	0.753399	0.0500667
ZNF324	zinc finger protein 324	0.892236	-0.0779715	0.377617	0.193848	0.735211	0.0787367
ZNF416	zinc finger protein 416	0.873418	0.150264	0.215091	0.453062	0.300757	-0.467615
ZNF586	zinc finger protein 586	0.814385	-0.234722	0.393109	-0.510356	0.137935	-0.757464
ZNF446	zinc finger protein 446	0.854619	-0.253404	0.808844	0.142644	0.56543	-0.422833
ZNF264	zinc finger protein 264	0.964553	0.0332663	0.119349	0.258196	0.968796	-0.032658
RPS5	ribosomal protein S5	0.981148	0.000737945	0.723213	-0.0246096	5.13578e-11	0.436282
FAT1	FAT atypical cadherin 1	0.086156	-0.421628	4.26873e-05	-0.825992	6.16694e-18	1.27954
YTHDC1	YTH domain containing 1	0.715192	0.116398	0.842218	-0.0917022	0.151263	0.200519
CHMP2B	charged multivesicular body protein 2B	0.839574	0.137887	0.699169	0.100554	0.0123819	-0.677903
SMAP2	small ArfGAP2	0.823695	-0.0724023	0.00687467	-0.493703	0.0861149	-0.300333
PPIE	peptidylprolyl isomerase E	0.589397	0.134452	0.60847	0.0473862	6.20529e-07	0.55563
ZMPSTE24	zinc metallopeptidase STE24	0.36117	-0.183128	0.188617	-0.25192	6.13052e-16	-1.14132
STARD7	StAR related lipid transfer domain containing 7	0.52417	-0.119771	0.033482	-0.298732	0.310966	-0.142841
NOA1	nitric oxide associated 1	0.681447	-0.117379	0.268364	-0.223209	8.95275e-17	0.909295
REST	RE1 silencing transcription factor	0.974482	0.0290505	0.0831573	0.317089	0.750327	-0.123518
HAL	histidine ammonia-lyase	nan	inf	nan	inf	nan	inf
SSH1	slingshot protein phosphatase 1	0.638204	-0.151073	0.578393	-0.178444	0.000110066	-0.685682
GSTP1	glutathione S-transferase pi 1	0.759803	0.0515881	0.14077	-0.195703	1.20219e-14	-0.553461
APLP2	amyloid beta precursor like protein 2	0.260619	0.125846	1.92624e-08	0.335304	0.0053283	0.184878
FAM234B	family with sequence similarity 234 member B	0.520427	-0.204402	0.000449274	-0.740909	0.00268236	0.546885
SLCO1A2	solute carrier organic anion transporter family member 1A2	0.41274	0.850032	0.774712	-0.37668	0.746387	0.287536
WBP11	WW domain binding protein 11	0.00984485	-0.303976	9.56055e-07	-0.540933	0.165642	-0.175244
EIF3I	eukaryotic translation initiation factor 3 subunit I	0.487885	-0.0693137	0.000650558	-0.263346	2.42738e-17	0.454837
NKAIN1	sodium/potassium transporting ATPase interacting 1	0.481533	0.202551	1.06597e-06	-0.880641	0.0368026	-0.400308
COL16A1	collagen type XVI alpha 1 chain	0.969569	0.0621592	0.0925375	0.590578	0.00398288	0.951672
TXLNA	taxilin alpha	0.951697	0.0331064	0.0357649	0.20479	0.434764	-0.116028
APOB	apolipoprotein B	nan	-inf	nan	-inf	nan	-inf
NCOA1	nuclear receptor coactivator 1	0.936724	-0.0244738	0.0606845	0.237786	0.338449	-0.180284
AGBL5	ATP/GTP binding protein like 5	0.851582	-0.0400133	0.85319	-0.0794746	6.7972e-05	0.37506
EFR3B	EFR3 homolog B	0.186977	-0.272215	6.5509e-09	-0.878287	9.81719e-07	-0.733271
KIF3C	kinesin family member 3C	0.00654327	0.249331	0.738032	-0.0870075	2.80152e-05	-0.348329
RAB10	RAB10, member RAS oncogene family	0.955155	-0.00827283	0.00369449	-0.267581	0.000483521	-0.270538
GCKR	glucokinase regulator	nan	1.21857	nan	0.720846	0.240566	1.85737
HADHA	hydroxyacyl-CoA dehydrogenase/3-ketoacyl-CoA thiolase/enoyl-CoA hydratase (trifunctional protein), alpha subunit	0.305657	0.121847	0.996289	-0.040976	6.23995e-10	0.396494
MAPRE3	microtubule associated protein RP/EB family member 3	0.0602872	-0.237874	0.0354491	-0.289273	0.0112224	-0.290604
CAD	carbamoyl-phosphate synthetase 2, aspartate transcarbamylase, and dihydroorotase	0.274551	0.254778	0.00613007	0.381315	0.0235683	0.342352
CD59	CD59 molecule (CD59 blood group)	0.00171285	-0.258326	2.80102e-24	0.607724	1.91392e-49	-1.11627
CD82	CD82 molecule	0.105407	-0.511865	0.000236867	0.821502	0.000364321	-0.928798
BCORL1	BCL6 corepressor like 1	0.706451	-0.129531	0.156266	0.198617	0.304593	-0.2216
ATRX	ATRX, chromatin remodeler	0.00363885	0.285353	1.62578e-07	0.377932	1.26639e-05	-0.393462
AK6	adenylate kinase 6	0.987385	0.00688058	0.143053	-0.299362	0.900772	-0.0412145
FCN1	ficolin 1	nan	-inf	nan	-inf	nan	-inf
MYNN	myoneurin	0.830764	-0.102213	0.495178	-0.239176	0.00981949	0.492509
MECOM	MDS1 and EVI1 complex locus	6.4658e-08	-2.34346	2.34216e-12	-3.17137	9.3018e-15	-4.09348
SCAMP1	secretory carrier membrane protein 1	0.28239	-0.208227	0.985888	-0.0562288	0.800786	0.0299903
PREP	prolyl endopeptidase	0.0272954	-0.318057	0.00668219	-0.39316	0.000161353	-0.459562
HACE1	HECT domain and ankyrin repeat containing E3 ubiquitin protein ligase 1	0.405063	-0.29202	0.405465	-0.264749	0.0830133	0.354071
SEH1L	SEH1 like nucleoporin	0.681892	0.1264	0.250691	-0.266894	0.0846852	0.267289
WDR47	WD repeat domain 47	0.776364	-0.0967881	0.121638	-0.342457	3.08539e-05	-0.761584
WDFY1	WD repeat and FYVE domain containing 1	0.0501855	-0.613436	0.352811	-0.349276	0.997119	-0.00782431
OVGP1	oviductal glycoprotein 1	nan	0.727166	0.913779	0.29956	0.0308895	1.92366
SLC25A24	solute carrier family 25 member 24	0.383497	0.213757	0.0089444	-0.437624	1.68744e-07	-0.80235
MAP3K4	mitogen-activated protein kinase kinase kinase 4	0.794174	0.173851	0.794252	0.0596639	0.0261831	0.579727
PILRA	paired immunoglobin like type 2 receptor alpha	0.226939	1.18382	0.245834	0.908666	0.233929	0.894402
IGSF9	immunoglobulin superfamily member 9	0.882051	0.0882548	0.702262	-0.173154	0.948687	0.0136856
ABCB1	ATP binding cassette subfamily B member 1	0.393487	0.165681	0.467096	-0.161528	0.000369927	0.378637
ZNF213	zinc finger protein 213	0.954909	-0.0209573	0.704219	-0.143422	0.529661	0.112825
AKR1B1	aldo-keto reductase family 1 member B	0.0912884	-0.14621	4.4527e-07	-0.387077	9.17933e-07	-0.338051
CPNE3	copine 3	0.972742	-0.00825543	0.532435	0.0571415	0.253827	0.145979
RRN3	RRN3 homolog, RNA polymerase I transcription factor	0.917163	0.0572597	0.692997	0.0512163	0.157433	0.245328
CTTN	cortactin	0.49789	-0.146243	0.879684	-0.0630783	1.51876e-10	-0.905533
WNT11	Wnt family member 11	0.963625	0.0818889	0.0589449	0.911812	8.76415e-05	1.58925
MTIF2	mitochondrial translational initiation factor 2	0.860295	0.099992	0.598386	0.107614	0.00140224	0.587161
DDHD2	DDHD domain containing 2	0.875155	0.0665121	0.436538	-0.18705	0.539329	0.0902556
TTC39A	tetratricopeptide repeat domain 39A	0.334663	0.437122	0.000567004	0.889264	0.00196721	-1.15203
EPS15	epidermal growth factor receptor pathway substrate 15	0.89841	0.0487484	0.615889	0.0441946	0.0232805	0.275292
ORC1	origin recognition complex subunit 1	0.997344	0.0111212	0.451715	-0.406181	0.0877161	0.621938
MGST2	microsomal glutathione S-transferase 2	0.0931016	-0.390266	5.35157e-06	0.642184	0.000197547	-0.699142
CHERP	calcium homeostasis endoplasmic reticulum protein	0.808816	-0.12574	0.871645	0.000657864	0.00323091	0.523157
ATG16L1	autophagy related 16 like 1	0.932739	0.0507728	0.932447	-0.0702829	0.337185	-0.256604
USP40	ubiquitin specific peptidase 40	0.960567	0.0221323	0.168424	0.245349	0.000697374	-0.718747
POMGNT1	protein O-linked mannose N-acetylglucosaminyltransferase 1 (beta 1,2-)	0.949494	0.0276099	4.02518e-05	0.319186	0.189916	0.127026
RAD54L	RAD54 like (S. cerevisiae)	0.95045	0.0616053	0.307229	-0.39024	0.175424	0.369776
MAST2	microtubule associated serine/threonine kinase 2	0.969046	-0.0119232	0.0664498	0.260175	0.00268476	0.430889
DNAJA1	DnaJ heat shock protein family (Hsp40) member A1	0.139587	0.130129	0.678854	-0.0839465	1.19872e-27	-0.653318
B4GALT1	beta-1,4-galactosyltransferase 1	0.428061	-0.215929	1.12058e-06	0.729401	0.209451	-0.251124
CHMP5	charged multivesicular body protein 5	0.623906	0.0870683	0.867507	-0.023709	1.17156e-08	0.409164
NFX1	nuclear transcription factor, X-box binding 1	0.181849	0.294175	0.00017101	0.505783	0.24396	0.19877
AQP6	aquaporin 6	nan	0.577167	0.703682	0.522548	0.824728	0.286171
DIMT1	DIM1 dimethyladenosine transferase 1 homolog	0.797669	-0.057531	0.917151	-0.0557031	0.022802	0.269549
IPO11	importin 11	0.893302	-0.0913055	0.00875926	0.589433	0.200753	0.341115
FOLH1	folate hydrolase 1	nan	-inf	nan	-inf	nan	-inf
EIF2AK1	eukaryotic translation initiation factor 2 alpha kinase 1	0.729919	0.0537549	0.300534	0.0384449	2.53356e-06	0.295224
NME8	NME/NM23 family member 8	nan	-1	nan	-0.279154	nan	0.115477
EPDR1	ependymin related 1	0.427241	0.158118	5.90315e-11	0.604776	0.000332431	-0.436588
SNX10	sorting nexin 10	0.449005	0.279486	0.871126	0.0353369	0.884843	-0.0479661
SEPHS1	selenophosphate synthetase 1	0.597121	-0.129252	0.0754582	-0.292083	0.108227	-0.221088
MRPL28	mitochondrial ribosomal protein L28	0.818651	-0.0410551	0.852635	-0.0830728	9.03502e-06	-0.394041
HBQ1	hemoglobin subunit theta 1	0.453431	-0.226578	0.896568	-0.0908355	0.113979	-0.325263
ITPKC	inositol-trisphosphate 3-kinase C	0.678947	0.204109	0.0198301	0.501743	0.63316	-0.168226
FAT2	FAT atypical cadherin 2	nan	1.57603	nan	-0.295456	nan	1.70454
RBM22	RNA binding motif protein 22	0.930645	0.0471492	0.429935	-0.191104	0.0825749	0.233591
TMED2	transmembrane p24 trafficking protein 2	0.000202216	-0.342532	6.84716e-07	-0.476859	0.0184163	-0.221888
ERO1B	endoplasmic reticulum oxidoreductase 1 beta	0.352614	-0.445038	0.383464	-0.36432	0.00267855	0.765634
ZFAND6	zinc finger AN1-type containing 6	0.336021	-0.161583	0.00600297	-0.360063	0.212256	0.138032
TXLNG	taxilin gamma	0.932125	0.0631388	0.00771424	0.443894	0.698138	-0.114792
PPEF1	protein phosphatase with EF-hand domain 1	0.955098	-0.0479661	0.00329743	-1.24514	0.822155	0.0974694
LAT2	linker for activation of T-cells family member 2	0.661601	0.390297	0.73764	0.210926	0.0805951	-1.02074
HUWE1	HECT, UBA and WWE domain containing 1, E3 ubiquitin protein ligase	0.158728	-0.204832	0.150629	0.126987	0.0267592	-0.270839
ZW10	zw10 kinetochore protein	0.662901	-0.203142	0.68562	-0.195734	0.20825	-0.354876
ALG9	ALG9, alpha-1,2-mannosyltransferase	0.177289	-0.274838	0.00915392	-0.450455	0.0786128	-0.297166
MYBPC2	myosin binding protein C, fast type	nan	-inf	nan	1.30039	nan	-inf
NOX4	NADPH oxidase 4	0.448007	0.500721	0.872798	-0.151718	0.0163631	-1.2617
ACOX3	acyl-CoA oxidase 3, pristanoyl	0.534593	0.304951	0.890103	-0.0996655	0.163591	0.394604
MTMR2	myotubularin related protein 2	0.916634	0.0425697	0.00192349	-0.459199	0.648871	-0.0890071
PPP1R15A	protein phosphatase 1 regulatory subunit 15A	0.998742	0.00436991	0.81343	0.00623869	0.753152	0.0609804
HSD17B14	hydroxysteroid 17-beta dehydrogenase 14	0.730028	0.113155	0.0314059	0.307925	0.763293	0.0411366
TRIP6	thyroid hormone receptor interactor 6	0.302162	-0.855836	0.639338	-0.383792	0.837969	-0.16549
ACHE	acetylcholinesterase (Cartwright blood group)	0.000977861	-0.529643	4.78416e-07	-0.780461	1.53398e-11	-1.02197
FTL	ferritin light chain	0.170053	-0.109955	5.75372e-22	0.465741	1.81776e-20	0.491274
SRRT	serrate, RNA effector molecule	0.865743	-0.0463077	0.342006	-0.190576	0.000243934	-0.44661
BAX	BCL2 associated X, apoptosis regulator	6.06479e-07	-0.425431	0.0798233	-0.217095	1.51339e-11	-0.562088
NLK	nemo like kinase	0.966348	0.0251773	0.814059	0.0310668	0.35429	0.215207
PIGS	phosphatidylinositol glycan anchor biosynthesis class S	0.952698	-0.0178968	0.886062	-0.0215209	0.245187	0.136106
ADAMTS2	ADAM metallopeptidase with thrombospondin type 1 motif 2	0.130068	-2.81117	0.139797	-1.77164	7.25405e-05	2.11694
ATXN7L3	ataxin 7 like 3	0.851032	-0.040631	0.559996	0.0320474	0.0180471	-0.262741
PGS1	phosphatidylglycerophosphate synthase 1	0.857979	0.0687139	0.762882	0.0131388	0.444916	-0.142196
PSMC5	proteasome 26S subunit, ATPase 5	0.517926	-0.0645696	0.0288713	-0.202787	2.15765e-15	-0.499006
UIMC1	ubiquitin interaction motif containing 1	0.968654	0.0339263	0.450107	-0.235874	0.075815	0.342914
CETP	cholesteryl ester transfer protein	nan	0	nan	-inf	nan	0.127756
MMP2	matrix metallopeptidase 2	0.000987545	-0.233692	0.185212	0.0466306	0.000102722	0.228409
MT3	metallothionein 3	0.983398	0.0534603	0.362497	-1.00116	0.0589258	-1.8225
LPCAT2	lysophosphatidylcholine acyltransferase 2	0.743609	-0.102099	0.0467295	-0.407682	0.158096	0.256338
GNAO1	G protein subunit alpha o1	4.41498e-07	-0.587051	4.1429e-10	-0.734888	0.951037	-0.0186758
OGFOD1	2-oxoglutarate and iron dependent oxygenase domain containing 1	0.933334	0.0422707	0.790204	0.0145575	0.8676	-0.0461439
SH3BP2	SH3 domain binding protein 2	0.0492955	0.462297	0.00303697	0.511331	0.356586	-0.24919
NOP14	NOP14 nucleolar protein	0.866161	-0.107273	0.568893	-0.258258	0.150564	-0.425187
ADD1	adducin 1	0.966331	-0.00433693	0.418351	0.0403923	1.64466e-08	-0.439323
L2HGDH	L-2-hydroxyglutarate dehydrogenase	0.752873	0.152288	0.125938	0.318875	0.000747064	0.657637
TXNDC16	thioredoxin domain containing 16	0.953297	0.0413329	0.334866	-0.273978	0.619922	0.111925
C14orf166	chromosome 14 open reading frame 166	0.589278	-0.0671642	0.00196541	-0.290351	0.129332	0.117028
NID2	nidogen 2	0.895804	0.0867733	1.10314e-05	0.78599	0.430257	0.183442
GMCL1	germ cell-less, spermatogenesis associated 1	0.7646	0.112047	0.228417	0.172241	0.0182245	0.35134
SF3B2	splicing factor 3b subunit 2	0.883791	-0.0223204	0.733321	-0.0841646	2.89568e-05	0.286431
KLHL42	kelch like family member 42	0.24334	0.219424	0.0111929	0.273239	5.09987e-09	-0.788981
GNAS	GNAS complex locus	0.0142215	-0.126518	1.22947e-15	-0.396201	6.96205e-66	-0.736624
DNM1L	dynamin 1 like	0.572347	0.140893	0.794438	-0.0998986	0.234592	0.151531
PTHLH	parathyroid hormone like hormone	0.56	-0.527557	0.549184	-0.462068	0.680286	-0.265267
PHACTR3	phosphatase and actin regulator 3	0.0648903	-0.781996	0.0424702	-0.763952	0.189215	-0.50227
ERGIC2	ERGIC and golgi 2	0.650063	-0.138172	0.998182	-0.061119	0.660015	-0.103546
TFAP2C	transcription factor AP-2 gamma	nan	0	nan	-inf	nan	-inf
AURKA	aurora kinase A	0.119781	0.381779	0.376077	-0.253102	1.18515e-06	0.781339
CASS4	Cas scaffolding protein family member 4	nan	0	nan	-0.295456	nan	-inf
PIR	pirin	0.459728	0.13204	0.354108	0.0683801	5.14283e-08	0.477814
AAMDC	adipogenesis associated Mth938 domain containing	0.384461	-0.116029	0.431794	0.0369071	0.00284353	-0.281798
RFX2	regulatory factor X2	0.972193	-0.0217865	0.797278	-0.166378	0.085886	0.487186
METTL2A	methyltransferase like 2A	0.654279	-0.116104	0.301306	-0.227447	0.00135751	0.40627
SULT2B1	sulfotransferase family 2B member 1	0.684227	0.344435	0.943661	-0.110759	0.055708	0.752533
ALG6	ALG6, alpha-1,3-glucosyltransferase	0.668354	-0.196906	0.469617	-0.270001	0.0823434	-0.457457
CNOT3	CCR4-NOT transcription complex subunit 3	0.991155	-0.00310766	0.053005	-0.342091	0.131989	0.207221
GP6	glycoprotein VI platelet	nan	0	nan	0.720846	nan	1.11548
PTPN4	protein tyrosine phosphatase, non-receptor type 4	0.473269	0.323581	0.230053	0.333643	0.104861	0.448867
DDX18	DEAD-box helicase 18	0.992568	0.00617963	0.851942	0.0144593	0.91888	-0.0414586
KHSRP	KH-type splicing regulatory protein	0.385465	-0.116854	2.76312e-05	-0.398697	0.311252	-0.114648
GNA11	G protein subunit alpha 11	0.812496	0.079293	0.298213	0.114445	0.000681906	-0.427156
ASAP3	ArfGAP with SH3 domain, ankyrin repeat and PH domain 3	0.561178	0.227148	0.125383	0.298477	0.371257	0.206477
EDEM2	ER degradation enhancing alpha-mannosidase like protein 2	0.218896	-0.261512	0.26235	0.148046	0.690012	0.0602998
DNMT3B	DNA methyltransferase 3 beta	0.71014	-0.239603	0.595274	-0.301916	0.000804475	0.967055
REM1	RRAD and GEM like GTPase 1	nan	-inf	nan	-inf	nan	inf
TPX2	TPX2, microtubule nucleation factor	0.356288	0.17684	9.45477e-05	-0.536799	8.60128e-11	0.687622
FER1L4	fer-1 like family member 4, pseudogene	0.088939	0.451152	5.41573e-12	1.15529	0.018449	0.469992
PDRG1	p53 and DNA damage regulated 1	0.4212	-0.185719	7.02691e-05	-0.621788	0.534398	0.0922115
EPB41L1	erythrocyte membrane protein band 4.1 like 1	0.90588	0.0560834	0.773291	0.00686884	0.111022	-0.253403
SLC15A1	solute carrier family 15 member 1	nan	-1	nan	-inf	nan	1.12163
DOCK9	dedicator of cytokinesis 9	0.880202	0.118239	0.78861	0.0771144	0.244002	0.348814
ANKRD10	ankyrin repeat domain 10	0.847545	0.0704435	0.654494	0.0328547	8.69748e-05	0.419939
TGDS	TDP-glucose 4,6-dehydratase	0.868675	-0.0859508	0.627411	0.0813368	0.0112571	0.482365
DOCK3	dedicator of cytokinesis 3	0.800176	0.460921	0.995857	-0.0778887	0.498614	0.586328
C3orf18	chromosome 3 open reading frame 18	0.529587	-0.191417	0.00456599	0.406023	0.218466	-0.248528
COQ9	coenzyme Q9	0.960204	0.0215414	0.177258	0.112914	0.0401393	-0.255135
TMEM40	transmembrane protein 40	nan	-inf	nan	-inf	nan	1.70454
KIF9	kinesin family member 9	0.202628	-0.369884	0.838779	-0.124173	0.194205	-0.316141
ARHGAP28	Rho GTPase activating protein 28	0.236416	-0.300532	0.551958	0.0994926	8.80511e-30	1.52522
CRLS1	cardiolipin synthase 1	0.635004	-0.109394	0.656517	-0.124144	0.401077	-0.132526
PPP1R13B	protein phosphatase 1 regulatory subunit 13B	0.907297	0.0649991	0.173609	0.280761	0.87645	0.0239514
ATRN	attractin	0.486832	-0.194982	0.445788	0.143652	0.900435	-0.0334203
SMOX	spermine oxidase	0.943764	0.0909666	0.301754	0.513431	0.159824	0.631572
SIGLEC1	sialic acid binding Ig like lectin 1	nan	-1	nan	-inf	nan	1.92811
FKBP1A	FK506 binding protein 1A	0.00136911	-0.229956	0.0720002	-0.184941	1.9684e-24	-0.6537
NSFL1C	NSFL1 cofactor	0.744985	-0.0679289	0.00260543	-0.363212	0.82345	-0.0459248
SLC4A11	solute carrier family 4 member 11	0.759218	-0.245457	0.406803	0.315372	0.879853	0.0724452
C20orf194	chromosome 20 open reading frame 194	0.407381	0.268425	0.0286783	0.381245	0.265829	-0.274893
ZNF343	zinc finger protein 343	0.971064	0.0387841	0.981924	-0.0357748	0.987306	0.000883102
EBF4	early B-cell factor 4	0.0756231	0.278612	0.000867565	0.338916	0.805422	0.0301054
CPXM1	carboxypeptidase X, M14 family member 1	0.0508077	-0.254083	4.53224e-05	0.338801	0.000705052	-0.372404
MAVS	mitochondrial antiviral signaling protein	0.96482	0.0173931	0.000229607	0.291499	2.96234e-06	-0.473823
LZTS3	leucine zipper tumor suppressor family member 3	0.890662	0.0749833	0.0132146	0.39845	0.0928389	0.296984
XRN2	5'-3' exoribonuclease 2	0.112273	0.206549	0.974903	-0.0347289	0.001094	0.288577
KIZ	kizuna centrosomal protein	0.861063	0.113758	0.876878	0.0122933	2.45415e-08	1.13292
DYNLL1	dynein light chain LC8-type 1	0.923791	-0.015949	0.0443134	-0.188194	1.02276e-44	-0.769482
TESC	tescalcin	0.708023	0.358356	0.703974	0.195798	0.527331	0.328506
SNX5	sorting nexin 5	0.863722	-0.0685332	0.350336	-0.229738	0.977397	-0.0264129
RPL6	ribosomal protein L6	0.702556	-0.0468393	0.0388001	-0.20947	7.59063e-23	0.573395
SIRPG	signal regulatory protein gamma	nan	-inf	nan	-inf	nan	-inf
MAPKAPK5	mitogen-activated protein kinase-activated protein kinase 5	0.992129	0.00136751	0.237511	-0.255334	0.208751	-0.230904
P2RX7	purinergic receptor P2X 7	0.365465	0.495675	0.992384	-0.0646729	0.499907	0.260579
ESF1	ESF1 nucleolar pre-rRNA processing protein homolog	0.489287	0.27932	0.938823	-0.00863605	0.955462	-0.0308041
RBBP9	RB binding protein 9, serine hydrolase	0.688052	-0.149486	0.324566	0.1735	0.3026	-0.241713
ANAPC5	anaphase promoting complex subunit 5	0.84709	0.0502863	0.328518	0.0730352	0.0234219	-0.281587
SLC23A2	solute carrier family 23 member 2	0.635272	-0.196027	0.101442	0.351966	0.0243303	-0.551632
SLC8B1	solute carrier family 8 member B1	0.722345	-0.173494	0.823677	0.0507022	0.195341	0.338166
TMEM230	transmembrane protein 230	0.465464	0.111101	0.00156661	0.212841	1.24877e-14	-0.641975
DZANK1	double zinc ribbon and ankyrin repeat domains 1	0.889737	0.172292	0.569843	0.268355	0.952354	-0.0530817
KDM2B	lysine demethylase 2B	0.84709	-0.0929302	0.678313	-0.174476	0.957961	0.0052502
CFAP61	cilia and flagella associated protein 61	nan	-1.09395	0.830906	-0.371784	0.0240212	-2.97513
LHX5	LIM homeobox 5	nan	0	nan	-inf	nan	3.70659
TASP1	taspase 1	0.260389	0.610431	0.389154	0.351318	0.733228	0.167385
OAS1	2'-5'-oligoadenylate synthetase 1	0.068875	-0.347204	1.31446e-06	-0.77495	3.05825e-07	-0.810761
GCN1	GCN1, eIF2 alpha kinase activator homolog	0.314966	0.2022	1.27136e-05	0.472446	0.000963768	0.391334
RPLP0	ribosomal protein lateral stalk subunit P0	0.00416736	-0.160201	1.30909e-10	-0.364988	5.33343e-51	0.67607
PXN	paxillin	0.842169	0.151048	0.053005	0.502553	0.936676	0.0303274
SIRT4	sirtuin 4	0.627682	0.423379	0.520026	0.311978	0.477276	0.362983
RPH3A	rabphilin 3A	1.82476e-06	-1.3126	0.000220208	-0.986286	0.000317468	-0.947663
KIF16B	kinesin family member 16B	0.811437	-0.14462	0.118458	0.407208	0.5731	-0.213863
TRMT6	tRNA methyltransferase 6	0.560519	-0.199661	0.218828	0.202008	0.145259	-0.325201
CHGB	chromogranin B	1.05458e-91	-1.10179	1.49218e-73	0.838473	2.37004e-196	-1.77865
PEBP1	phosphatidylethanolamine binding protein 1	0.0297332	-0.170078	0.978657	-0.0555205	8.20813e-09	-0.382322
BRAP	BRCA1 associated protein	0.979728	0.0203759	0.435646	0.170117	0.0305282	0.438924
ERP29	endoplasmic reticulum protein 29	0.53776	-0.0742371	1.20054e-15	0.417132	0.726185	0.0153323
NOS1	nitric oxide synthase 1	nan	-0.272834	nan	-2.88486	0.925574	0.115136
FUS	FUS RNA binding protein	0.498777	-0.0759646	6.95882e-18	-0.573469	4.40493e-77	-1.18401
IGBP1	immunoglobulin binding protein 1	0.532008	-0.108306	0.744849	-0.00823993	6.58077e-13	0.611911
FXYD5	FXYD domain containing ion transport regulator 5	0.221195	-0.969356	0.000599655	-2.32409	3.94849e-05	1.53687
ZNF302	zinc finger protein 302	0.817786	-0.0836857	0.9915	-0.0457276	0.989816	-0.0166713
GRAMD1A	GRAM domain containing 1A	0.981652	0.0120141	0.394033	0.0554031	2.23263e-08	0.467512
FXYD3	FXYD domain containing ion transport regulator 3	nan	-inf	nan	-inf	nan	inf
HEPH	hephaestin	nan	-inf	nan	-inf	nan	1.92811
CDIP1	cell death inducing p53 target 1	0.586505	0.121813	0.0764664	0.164661	0.424012	-0.122585
CMTM1	CKLF like MARVEL transmembrane domain containing 1	0.297747	-1.00891	0.684695	-0.383406	0.0921147	-1.20386
KCNH4	potassium voltage-gated channel subfamily H member 4	nan	-0.199803	0.886768	0.302473	0.112814	1.43899
GANAB	glucosidase II alpha subunit	4.20244e-06	-0.331554	0.00287028	0.16278	0.169399	0.0972994
GMIP	GEM interacting protein	0.80125	-0.11344	0.0257559	-0.529116	0.0700588	-0.40732
RBM41	RNA binding motif protein 41	0.864865	0.172292	0.5083	0.284855	0.574021	0.254645
BIRC5	baculoviral IAP repeat containing 5	0.916418	-0.0262597	4.67752e-14	-0.678372	1.50566e-12	0.536079
LAG3	lymphocyte activating 3	0.930645	0.176505	0.789058	0.256762	0.690238	0.301679
MLF2	myeloid leukemia factor 2	0.0166706	-0.160561	0.00601053	-0.216927	0.97134	-0.0176474
OTUB2	OTU deubiquitinase, ubiquitin aldehyde binding 2	0.9648	-0.0570811	0.269399	-0.869296	0.528299	-0.468119
DDX24	DEAD-box helicase 24	0.561264	-0.103835	0.420153	-0.150914	0.0876196	-0.201696
ZBTB25	zinc finger and BTB domain containing 25	0.873694	-0.0733273	0.945808	-0.0284541	0.759273	0.0717918
NECAP1	NECAP endocytosis associated 1	0.888929	-0.0514565	0.487222	-0.198034	0.855097	-0.048
ARHGAP4	Rho GTPase activating protein 4	0.933424	0.0863465	0.0613101	0.519826	0.00243237	0.765721
ANKRD24	ankyrin repeat domain 24	0.932961	0.125639	0.424775	0.38051	0.00209192	1.2022
DHX32	DEAH-box helicase 32 (putative)	0.941078	-0.0259066	0.670988	0.077301	0.707657	-0.104326
RCOR1	REST corepressor 1	0.990772	0.00133184	5.87578e-07	-1.02898	0.971544	-0.0297066
GPATCH2L	G-patch domain containing 2 like	0.533125	0.225893	0.277039	0.220362	0.00276441	0.552552
LTBP4	latent transforming growth factor beta binding protein 4	0.000204442	0.541164	3.04315e-07	0.591968	4.49219e-11	0.795085
BLVRB	biliverdin reductase B	0.298189	-0.132743	0.550908	-0.124447	0.00206862	0.246242
SLC9A1	solute carrier family 9 member A1	0.72785	-0.203883	0.928091	-0.0101788	0.00218563	-0.949196
SPTLC1	serine palmitoyltransferase long chain base subunit 1	0.9922	-0.0083905	0.30393	-0.481404	0.97648	-0.0240585
PAPOLA	poly(A) polymerase alpha	0.914894	0.0357634	0.3035	-0.156563	0.00457028	0.235807
CCNK	cyclin K	nan	0.309911	nan	-0.706269	0.72918	0.69788
PCBP4	poly(rC) binding protein 4	0.370698	0.143407	0.994193	-0.0445383	1.94086e-17	-0.829549
YPEL3	yippee like 3	0.127301	0.212077	0.000301351	0.315255	1.25051e-18	0.793306
MRPS33	mitochondrial ribosomal protein S33	0.964553	0.0118356	0.441766	-0.134584	0.248173	0.0874783
NDUFB2	NADH:ubiquinone oxidoreductase subunit B2	0.868675	0.0339382	0.0163665	-0.211638	2.67146e-30	-0.671823
NUDC	nuclear distribution C, dynein complex regulator	0.923791	-0.0127751	0.90745	-0.0307609	0.208288	-0.130454
MAEA	macrophage erythroblast attacher	0.839697	0.0634486	0.944872	-0.0352277	9.20104e-10	-0.751519
ICAM1	intercellular adhesion molecule 1	0.815142	-0.455883	0.47547	0.616594	0.533269	0.531881
STRN4	striatin 4	0.807314	0.0567341	0.795932	-0.0105827	0.60847	-0.0860572
IRAK3	interleukin 1 receptor associated kinase 3	nan	-inf	nan	-inf	nan	inf
SI	sucrase-isomaltase	nan	inf	nan	-inf	nan	-inf
MUL1	mitochondrial E3 ubiquitin protein ligase 1	0.927625	0.0315172	0.97566	-0.0622806	0.0186257	-0.365268
TFAP4	transcription factor AP-4	0.938285	-0.0537922	0.818604	-0.147303	0.000510284	0.728632
PDCD7	programmed cell death 7	0.245183	0.269268	0.964797	-0.03384	0.0925678	0.265746
SPG21	SPG21, maspardin	0.713955	-0.0747576	0.979092	-0.047456	0.471686	0.0775096
DNAJB11	DnaJ heat shock protein family (Hsp40) member B11	0.00364386	-0.299577	2.83306e-21	-0.8815	1.70823e-14	-0.706257
P3H2	prolyl 3-hydroxylase 2	nan	-2.17289	0.0808286	-inf	0.000363835	2.23335
THPO	thrombopoietin	nan	1.09037	0.729209	-0.771638	0.526106	0.769336
CHRD	chordin	0.630148	0.40702	1	-0.0208787	0.00544493	1.05148
FLT3LG	fms related tyrosine kinase 3 ligand	nan	0	nan	0.720846	nan	0.115477
RAB11FIP3	RAB11 family interacting protein 3	0.838416	0.0775359	0.046094	0.250589	0.155826	-0.247352
GNPTG	N-acetylglucosamine-1-phosphate transferase gamma subunit	0.731919	-0.23889	0.0246428	0.674395	0.291243	-0.435369
ZNF268	zinc finger protein 268	0.128011	0.381529	0.0153787	0.401431	0.0555244	-0.418704
GOLGA3	golgin A3	0.872251	0.0680204	0.0365896	0.232924	0.198662	0.170616
PABPC4	poly(A) binding protein cytoplasmic 4	0.742581	-0.0654617	0.531142	-0.126606	0.369658	0.093634
CD209	CD209 molecule	nan	1.31657	nan	-0.279154	nan	0.115477
CERS4	ceramide synthase 4	0.148954	0.316553	5.53045e-14	0.996676	0.837486	0.0293211
MCOLN1	mucolipin 1	0.574357	-0.267787	0.921601	-0.0793302	1.70095e-05	-1.21817
USP48	ubiquitin specific peptidase 48	0.572518	-0.141255	0.0214161	-0.400592	0.00899442	-0.406801
EFNB1	ephrin B1	0.687908	-0.171264	0.812975	-0.120983	0.179237	0.269039
PDPR	pyruvate dehydrogenase phosphatase regulatory subunit	0.376425	0.24536	1.9951e-05	0.591643	0.0431002	0.326355
AARS	alanyl-tRNA synthetase	0.130479	0.225135	0.538974	0.047359	0.0484807	0.198669
GLG1	golgi glycoprotein 1	0.43128	-0.114431	0.01374	0.196486	0.308485	-0.125107
KIF4A	kinesin family member 4A	0.75065	0.104098	5.27148e-05	-0.710052	1.07603e-06	0.671208
TNRC6A	trinucleotide repeat containing 6A	0.481244	0.275464	0.705954	0.0858367	0.0504099	-0.487118
PLEKHG2	pleckstrin homology and RhoGEF domain containing G2	0.866773	-0.069217	0.91053	-0.0819431	0.00120279	-0.596007
DLL3	delta like canonical Notch ligand 3	0.742581	-0.0693228	0.88695	-0.0725202	0.00378519	-0.341208
NAT14	N-acetyltransferase 14 (putative)	0.0890006	-0.203533	0.474634	-0.150318	1.33619e-05	-0.417942
PITPNM2	phosphatidylinositol transfer protein membrane associated 2	0.900163	0.227312	0.00847374	1.46171	0.936471	-0.162495
EXOC1	exocyst complex component 1	0.782569	0.0993333	0.796272	0.0146762	0.186603	0.209273
RBM27	RNA binding motif protein 27	0.471499	-0.224435	0.353419	-0.274777	0.995632	-0.0200613
OSBPL8	oxysterol binding protein like 8	0.131068	0.246092	0.775187	-0.115308	0.245378	0.146899
DTX2	deltex E3 ubiquitin ligase 2	0.923092	-0.0456208	0.367891	-0.284099	0.821498	-0.0799695
NLRC4	NLR family CARD domain containing 4	nan	-0.430634	nan	0.51922	nan	0.114966
PUS7	pseudouridylate synthase 7 (putative)	0.821052	0.132847	0.480305	-0.245481	0.7841	-0.10144
LAMB4	laminin subunit beta 4	nan	1.99666	nan	1.52588	0.663674	1.12163
NRCAM	neuronal cell adhesion molecule	0.108869	-0.260743	2.72685e-18	-1.13012	0.0815797	0.225437
LAMB1	laminin subunit beta 1	0.205922	0.150983	4.64425e-10	0.402889	7.79829e-06	0.323534
SLC26A4	solute carrier family 26 member 4	nan	-inf	nan	inf	nan	inf
SLC26A3	solute carrier family 26 member 3	nan	0	nan	-inf	nan	0.127756
DLD	dihydrolipoamide dehydrogenase	0.965406	0.0191967	0.370322	-0.162705	0.0483352	-0.225535
WDR7	WD repeat domain 7	0.879223	-0.0973798	0.614404	-0.218253	0.359088	-0.304269
TXNL1	thioredoxin like 1	0.555873	-0.0751135	0.109405	-0.183745	1.28452e-09	0.396256
IL5RA	interleukin 5 receptor subunit alpha	nan	-1.32726	nan	-1.60642	nan	-1.21178
ABCC6	ATP binding cassette subfamily C member 6	0.879325	0.153673	0.30245	0.418196	0.121759	-0.811426
CMTM6	CKLF like MARVEL transmembrane domain containing 6	0.0597582	-0.233236	0.0538826	-0.259949	0.974318	-0.00423479
ITGA6	integrin subunit alpha 6	0.495123	0.406593	0.542102	0.246407	0.510512	0.269006
RAPGEF4	Rap guanine nucleotide exchange factor 4	0.432845	-0.263207	0.0505562	0.37472	2.35784e-05	-0.965499
MAP3K20	mitogen-activated protein kinase kinase kinase 20	0.7757	-0.0935643	0.512809	-0.180844	0.249098	-0.224051
SMPX	small muscle protein, X-linked	nan	1	nan	1.72085	nan	0.127756
FH	fumarate hydratase	0.380265	-0.159895	0.0258044	-0.318711	0.164032	0.1758
SEL1L3	SEL1L family member 3	3.98275e-15	-1.75904	6.79342e-09	-1.20771	1.00562e-05	-0.915505
TF	transferrin	nan	0.576029	nan	0.720846	nan	1.44478
CDV3	CDV3 homolog	0.710888	-0.0820255	0.262548	-0.196851	4.08078e-05	0.414222
MYO15A	myosin XVA	nan	0.281675	0.875663	0.545928	0.438564	1.11798
ALKBH5	alkB homolog 5, RNA demethylase	0.838673	-0.0353084	0.156647	-0.190722	0.255602	0.103028
APOH	apolipoprotein H	0.648007	-0.382069	0.00602725	0.959705	0.244622	-0.5866
NLRP1	NLR family pyrin domain containing 1	0.2144	-0.156705	0.877051	-0.0707512	1.01837e-06	-0.436496
PITPNM3	PITPNM family member 3	nan	0.309911	nan	0.299145	0.685893	0.69788
SPAG7	sperm associated antigen 7	0.269551	0.181581	0.68232	-0.115448	0.262568	0.120453
ORC6	origin recognition complex subunit 6	0.596803	-0.163084	3.44352e-05	-0.757683	0.0281296	-0.408565
ZFHX4	zinc finger homeobox 4	0.95045	-0.0311877	0.856705	0.0369745	0.000150537	-0.962493
SLC17A6	solute carrier family 17 member 6	nan	-inf	nan	inf	nan	-inf
CPA1	carboxypeptidase A1	nan	0.670385	0.181242	1.14933	0.605986	-0.879812
ZC3HC1	zinc finger C3HC-type containing 1	0.0751778	0.312479	0.995566	-0.0493156	0.0788433	-0.292268
ESR1	estrogen receptor 1	nan	-inf	nan	inf	nan	-inf
RGS17	regulator of G protein signaling 17	0.559806	-0.226317	0.276144	-0.323768	0.526004	0.149251
ANGPT2	angiopoietin 2	0.94425	-0.0975575	0.0105079	-1.40389	0.00400861	-1.61948
TMEM101	transmembrane protein 101	0.0429065	0.327375	0.0618631	0.210408	0.225452	0.164911
CD200	CD200 molecule	0.131437	-0.40829	4.96872e-27	-2.82391	9.41171e-05	-0.847941
CCDC80	coiled-coil domain containing 80	0.0329829	-0.411564	9.47162e-10	0.791417	6.19813e-11	-1.10965
PSME1	proteasome activator subunit 1	0.0646857	-0.166006	5.27777e-14	0.44097	0.000357138	0.237074
PPP2R3C	protein phosphatase 2 regulatory subunit B''gamma	0.25361	0.209748	0.00104423	-0.464254	7.65538e-07	0.534996
HAUS4	HAUS augmin like complex subunit 4	0.820815	0.232738	0.991422	-0.0158339	0.0123897	0.979566
JPH4	junctophilin 4	0.759578	0.0800749	0.061244	0.175407	0.073701	-0.243191
MYH7	myosin heavy chain 7	nan	-inf	nan	inf	nan	-inf
SLC7A8	solute carrier family 7 member 8	nan	1	nan	-0.295456	nan	0.127756
OSGEP	O-sialoglycoprotein endopeptidase	0.204733	0.318637	0.431843	0.124726	1.22014e-05	-0.867968
SLC22A17	solute carrier family 22 member 17	1.10856e-18	-0.515636	5.41437e-20	-0.572549	7.68044e-05	-0.254738
RNF31	ring finger protein 31	nan	-1.01338	nan	-0.0635251	0.698485	-0.884864
SCFD1	sec1 family domain containing 1	0.971064	0.0212428	0.523241	0.0609922	0.00302445	0.371951
G2E3	G2/M-phase specific E3 ubiquitin protein ligase	0.649996	0.157902	0.063051	-0.383898	9.85711e-06	0.639117
HECTD1	HECT domain E3 ubiquitin protein ligase 1	0.588616	-0.138999	0.965757	-0.0224162	0.275986	-0.202775
HNRNPC	heterogeneous nuclear ribonucleoprotein C (C1/C2)	0.641685	-0.0522579	0.093493	-0.173801	1.37092e-30	0.63134
RPGRIP1	retinitis pigmentosa GTPase regulator interacting protein 1	nan	1.4479	nan	1.17214	0.647637	-1.87891
SUPT16H	SPT16 homolog, facilitates chromatin remodeling subunit	0.837387	0.0584802	0.445964	0.0555728	0.424489	0.081778
TOX4	TOX high mobility group box family member 4	0.947322	-0.0172924	0.642719	0.0379068	0.52454	0.0879095
GEMIN2	gem nuclear organelle associated protein 2	0.866745	0.130319	0.47547	-0.296291	0.22533	0.351454
TGM1	transglutaminase 1	nan	2.90154	0.0727614	2.80735	0.437068	1.70454
TINF2	TERF1 interacting nuclear factor 2	0.553884	0.142337	0.0359726	0.210134	0.479429	-0.124342
SEMA6A	semaphorin 6A	0.434145	-0.205877	0.262107	0.159631	0.00579837	-0.493252
TRPM7	transient receptor potential cation channel subfamily M member 7	0.735609	-0.202266	0.720198	-0.210922	0.0619812	-0.584666
TYRO3	TYRO3 protein tyrosine kinase	0.725468	0.135673	0.769064	-0.109901	0.504687	-0.16041
WDR76	WD repeat domain 76	0.633046	-0.14914	0.186332	-0.309432	0.112379	-0.314915
SNAP23	synaptosome associated protein 23	0.442915	0.263169	6.75142e-05	0.708668	0.264295	-0.302908
PHGDH	phosphoglycerate dehydrogenase	0.00944684	-0.21838	0.000442968	-0.308058	1.41485e-06	-0.367904
COL9A3	collagen type IX alpha 3 chain	0.81887	-0.0883527	9.82475e-16	-1.4767	0.000170824	0.564478
EZR	ezrin	0.383497	-0.124479	0.889072	-0.02007	0.00108945	-0.319928
MYL6	myosin light chain 6	0.138027	-0.134608	0.547204	-0.118969	1.00176e-31	-0.745719
AGO1	argonaute 1, RISC catalytic component	0.882884	0.0544657	0.00220945	0.359036	0.0705517	-0.299001
TEKT2	tektin 2	nan	0.18549	0.915772	-0.285283	0.736445	0.47834
CLSPN	claspin	0.855019	0.219092	0.529605	0.335707	0.00860079	-1.59638
RFFL	ring finger and FYVE like domain containing E3 ubiquitin protein ligase	0.987385	-0.00824964	0.842627	0.00515758	0.719016	0.0569208
UNC13D	unc-13 homolog D	0.703172	0.431831	0.162768	0.790948	0.826027	0.167809
MFSD11	major facilitator superfamily domain containing 11	0.218896	0.227145	0.867507	-0.078814	0.980712	-0.0180963
DPYSL2	dihydropyrimidinase like 2	0.964964	7.72681e-05	3.0782e-34	-0.862955	4.45868e-15	-0.551404
TGFB2	transforming growth factor beta 2	0.993628	0.0351116	0.856548	0.0983504	0.050254	-1.34104
GPATCH2	G-patch domain containing 2	0.991426	0.0056536	0.851284	-0.113387	0.163886	0.3304
NUP50	nucleoporin 50	0.0179717	-0.493717	0.00615915	-0.53676	0.0322537	-0.410219
CDC45	cell division cycle 45	0.315635	-0.343304	0.0984822	-0.4786	0.0025089	-0.723186
COMT	catechol-O-methyltransferase	0.350588	0.128851	1.76453e-05	0.293308	8.10518e-34	-1.06586
ADA2	adenosine deaminase 2	0.688101	0.522402	0.675224	-0.454072	0.0119489	1.40705
ECHDC1	ethylmalonyl-CoA decarboxylase 1	0.56674	0.138858	0.083394	-0.302668	0.0584736	-0.279623
LRRFIP2	LRR binding FLII interacting protein 2	0.733702	0.108303	0.832048	0.00809488	0.00567218	0.363555
SEC22C	SEC22 homolog C, vesicle trafficking protein	0.482205	0.173394	0.341297	-0.211623	0.294586	-0.185817
XYLB	xylulokinase	0.301015	1.10588	0.168415	1.03725	0.539915	-0.884864
HDAC6	histone deacetylase 6	0.0312122	0.441067	0.125885	0.253966	0.00527747	0.453721
GABRP	gamma-aminobutyric acid type A receptor pi subunit	0.635904	-0.446248	0.000247595	-2.50716	0.0609844	-1.10526
CDC6	cell division cycle 6	0.427839	-0.216581	0.00447238	-0.549459	0.0832022	-0.334844
UPRT	uracil phosphoribosyltransferase homolog	0.599802	0.21113	0.284169	0.207343	0.00415496	-0.693761
CDC23	cell division cycle 23	0.309808	0.224474	0.00765863	-0.458288	0.0127816	0.336272
AAAS	aladin WD repeat nucleoporin	0.861091	-0.0522009	0.0307857	-0.322403	0.720928	0.0392366
CBX5	chromobox 5	0.13058	-0.157558	0.207239	-0.168103	0.000204683	-0.317715
FMO2	flavin containing monooxygenase 2	nan	-inf	nan	-inf	nan	-inf
SUCO	SUN domain containing ossification factor	0.954291	-0.0169905	0.981939	-0.0488079	3.83255e-05	0.50203
MSH2	mutS homolog 2	0.671764	-0.0820994	0.0034286	-0.359502	0.939411	-0.00101881
MAP3K1	mitogen-activated protein kinase kinase kinase 1	0.246549	-0.341281	0.000968057	-0.747583	0.0257765	-0.498649
DHPS	deoxyhypusine synthase	0.782095	-0.0486624	0.134833	-0.19071	1.32262e-18	0.590011
HOOK2	hook microtubule tethering protein 2	0.96482	0.0228987	0.0299011	0.326958	0.896248	0.0191673
ARCN1	archain 1	0.699401	-0.0671591	0.74751	0.00829901	0.0899142	0.155365
EPB41L4B	erythrocyte membrane protein band 4.1 like 4B	0.932518	-0.0530401	0.287463	0.340684	0.0349888	-0.668502
TMEM38B	transmembrane protein 38B	0.698564	-0.140925	0.509229	-0.214194	7.41634e-07	0.783976
PSMD5	proteasome 26S subunit, non-ATPase 5	0.979066	0.0165038	0.589299	0.0802576	0.0441816	0.347284
PTGS1	prostaglandin-endoperoxide synthase 1	0.0178846	-0.729287	1.41553e-08	1.08713	0.00292313	-0.826447
NUP188	nucleoporin 188	0.864556	0.0766301	0.390298	0.134022	0.790377	-0.0784472
CRAT	carnitine O-acetyltransferase	0.956409	0.0398388	0.0147181	0.320611	0.0128582	0.36663
SH2D3C	SH2 domain containing 3C	0.868675	0.099992	0.74931	0.0510391	4.76348e-05	0.723851
NANS	N-acetylneuraminate synthase	0.930645	0.0366217	0.127622	-0.284035	0.363314	-0.161116
TBC1D2	TBC1 domain family member 2	0.86319	-0.158104	0.971673	-0.0246038	0.820839	0.0965301
WHRN	whirlin	0.944119	-0.0742728	0.84782	0.0592278	0.0584028	0.650919
PDE6C	phosphodiesterase 6C	nan	1.31657	nan	-1.29546	nan	1.12163
CWF19L1	CWF19 like 1, cell cycle control (S. pombe)	0.922024	-0.0497464	0.84782	0.0158766	0.623686	0.117052
SEMA4G	semaphorin 4G	0.973077	0.0546232	0.947965	0.00532033	0.420354	0.379969
BTAF1	B-TFIID TATA-box binding protein associated factor 1	0.66265	0.226611	0.977673	-0.0641303	0.0449385	0.459993
IKZF5	IKAROS family zinc finger 5	0.942316	-0.0374373	0.284229	-0.373244	0.617311	0.145718
BLNK	B-cell linker	nan	inf	nan	inf	nan	inf
TLL2	tolloid like 2	0.79318	-0.271608	0.782106	-0.25429	0.0852027	-0.944997
CYP26A1	cytochrome P450 family 26 subfamily A member 1	3.62753e-56	0.746872	1.07612e-241	1.44336	1.05584e-19	-0.475758
TDRD1	tudor domain containing 1	nan	inf	nan	-inf	nan	-inf
SORBS1	sorbin and SH3 domain containing 1	0.642965	-0.347845	0.679345	-0.260801	0.0152822	0.821289
CRTAC1	cartilage acidic protein 1	0.305657	-0.434132	0.00052071	-1.0914	6.46113e-05	0.956573
BAMBI	BMP and activin membrane bound inhibitor	0.0518157	-0.343033	4.32582e-28	-1.65911	0.000133498	-0.562063
IL11	interleukin 11	0.170842	0.54703	0.598944	0.156538	0.0947733	0.491049
MYO3A	myosin IIIA	nan	-inf	nan	-inf	nan	inf
WAC	WW domain containing adaptor with coiled-coil	0.427973	0.117655	0.775533	-0.00517833	0.71808	0.031138
CREM	cAMP responsive element modulator	0.00115837	-0.294173	5.00842e-11	-0.578491	8.1563e-19	-0.735315
NUBP2	nucleotide binding protein 2	0.499339	-0.116709	0.436539	-0.155589	0.80347	-0.0516397
SMIM24	small integral membrane protein 24	0.380265	0.545875	0.032186	-1.19394	0.0675862	0.732535
HIVEP1	human immunodeficiency virus type I enhancer binding protein 1	0.883256	0.135973	0.125946	0.56961	0.604422	0.2382
FKBP5	FK506 binding protein 5	0.550107	0.208139	0.0561357	-0.405748	0.960264	-0.0183706
SRPK1	SRSF protein kinase 1	0.902827	-0.0402389	0.0510147	-0.325956	0.000491771	0.401027
BRPF3	bromodomain and PHD finger containing 3	0.394971	0.383065	0.403052	0.251207	0.935019	-0.0373629
MRPS18A	mitochondrial ribosomal protein S18A	nan	0.731612	nan	-1.88042	nan	-0.469485
PGC	progastricsin	nan	inf	nan	inf	nan	inf
TMEM14A	transmembrane protein 14A	0.000805156	-0.303337	1.94212e-10	-0.559486	2.45797e-12	-0.595848
EFHC1	EF-hand domain containing 1	0.835434	-0.104208	0.108371	0.315184	0.397727	0.193552
NCR2	natural cytotoxicity triggering receptor 2	nan	inf	nan	-inf	nan	inf
HSP90AB1	heat shock protein 90 alpha family class B member 1	0.00679661	-0.143033	9.47149e-07	-0.27351	2.24225e-06	0.211292
CDC5L	cell division cycle 5 like	0.759384	0.0861109	0.647005	0.0322179	0.519545	-0.116225
ITPR3	inositol 1,4,5-trisphosphate receptor type 3	0.696118	-0.271326	0.39396	0.31295	0.000991034	0.94001
ZNF184	zinc finger protein 184	0.281393	0.453618	0.932719	0.022731	0.759871	0.117149
DSP	desmoplakin	nan	inf	nan	-inf	nan	-inf
SIRT1	sirtuin 1	0.0607473	0.483089	0.517589	0.136262	0.0801606	0.366099
HNRNPH3	heterogeneous nuclear ribonucleoprotein H3	0.618045	-0.0635547	9.30161e-09	-0.448732	0.829656	0.0080692
IFT74	intraflagellar transport 74	0.782095	0.151635	0.130559	0.375256	0.0219091	0.544331
JAK2	Janus kinase 2	0.81796	0.261597	0.568402	-0.464731	0.999371	-0.0165512
IL12RB1	interleukin 12 receptor subunit beta 1	nan	inf	nan	-inf	nan	-inf
[truncated: 30,741 more rows]

## Sheet: All counts
gene_id	gene_symbol	description	del268T_a	del268T_b	del268T_c	ins395A_a	ins395A_b	ins395A_c	eCtrl_a	eCtrl_b	eCtrl_c	WT_a	WT_b	WT_c
as__ENSG00000180155 /// as__ENSG00000284505 /// ENSG00000283992 /// ENSG00000180155	LYNX1	Ly6/neurotoxin 1	120	138	99	205	154	139	98	69	116	127	104	86
as__ENSG00000182957 /// as__ENSG00000228741 /// ENSG00000182957	SPATA13	spermatogenesis associated 13	11	19	11	20	14	11	14	11	14	21	15	8
as__ENSG00000188626 /// as__ENSG00000261480	GOLGA8M	golgin A8 family member M	0	1	1	0	0	0	0	0	1	1	2	2
as__ENSG00000200693 /// ENSG00000221040 /// ENSG00000212195 /// as__ENSG00000212195 /// ENSG00000238297 /// ENSG00000200693 /// ENSG00000200318	U3	Small nucleolar RNA U3	35	35	28	37	24	24	22	18	30	41	37	27
as__ENSG00000201465 /// ENSG00000206878 /// ENSG00000201863	SNORA51	Small nucleolar RNA SNORA51	0	3	0	0	1	2	2	1	3	0	1	3
as__ENSG00000202343 /// as__ENSG00000206647 /// ENSG00000202343	SNORA2	Small nucleolar RNA SNORA2/SNORA34 family	4	3	2	3	3	0	1	3	5	1	0	1
as__ENSG00000214837 /// as__ENSG00000231512	LINC01347	long intergenic non-protein coding RNA 1347	0	0	1	0	0	0	1	1	0	0	1	0
as__ENSG00000222604 /// ENSG00000222604 /// ENSG00000206976	SNORA7	Small nucleolar RNA SNORA7	0	0	3	2	1	0	1	0	0	0	1	0
as__ENSG00000229694 /// ENSG00000235641	LINC00484	long intergenic non-protein coding RNA 484	0	0	2	0	0	0	0	0	0	1	0	0
as__ENSG00000236756 /// as__ENSG00000227540 /// ENSG00000227540	DNAJC9-AS1	DNAJC9 antisense RNA 1	27	35	20	54	29	35	34	23	34	79	54	50
as__ENSG00000237517 /// ENSG00000283406 /// ENSG00000237517	DGCR5	DiGeorge syndrome critical region gene 5 (non-protein coding)	9	10	9	6	2	8	12	3	13	11	5	4
as__ENSG00000237940 /// ENSG00000237940 /// as__ENSG00000261186 /// ENSG00000261186	LINC01238	long intergenic non-protein coding RNA 1238	4	10	2	7	10	13	6	3	7	5	8	4
as__ENSG00000254978 /// as__ENSG00000248671 /// ENSG00000248671	ALG1L9P	asparagine-linked glycosylation 1-like 9, pseudogene	2	0	1	2	4	3	1	2	1	7	5	4
as__ENSG00000266217 /// as__ENSG00000280913	CTSLP2	cathepsin L pseudogene 2	10	14	8	27	20	17	20	13	19	28	23	17
as__ENSG00000268439 /// ENSG00000268439 /// as__ENSG00000126749 /// ENSG00000126749	EMG1	EMG1, N1-specific pseudouridine methyltransferase	168	220	161	209	188	172	166	140	209	132	162	115
as__ENSG00000272617 /// ENSG00000272617 /// as__ENSG00000213380 /// ENSG00000213380	COG8	component of oligomeric golgi complex 8	333	390	315	636	416	396	367	275	356	352	293	242
as__ENSG00000274075 /// as__ENSG00000276673 /// ENSG00000277568 /// ENSG00000275227	uc_338	TUC338	6	7	2	3	4	0	3	6	8	2	2	3
as__ENSG00000275757 /// ENSG00000274917 /// as__ENSG00000278189 /// as__ENSG00000274917 /// ENSG00000278233 /// as__ENSG00000277739 /// ENSG00000276700 /// as__ENSG00000276700 /// ENSG00000277739 /// ENSG00000275215 /// as__ENSG00000278233 /// ENSG00000278189 /// as__ENSG00000275215 /// ENSG00000275757	RNA5-8S5	RNA, 5.8S ribosomal 5	827	781	664	1449	1066	1213	910	874	1218	441	424	420
as__ENSG00000276735 /// as__ENSG00000278109 /// ENSG00000278636 /// ENSG00000274008 /// ENSG00000274883 /// ENSG00000278109 /// ENSG00000276823 /// as__ENSG00000275041 /// ENSG00000276735 /// ENSG00000273913 /// as__ENSG00000277592 /// ENSG00000237611 /// ENSG00000264809 /// ENSG00000276096 /// ENSG00000275978 /// as__ENSG00000275213 /// as__ENSG00000280502 /// ENSG00000276729 /// ENSG00000277965…	Metazoa_SRP	Metazoan signal recognition particle RNA	22	33	29	63	30	39	27	13	18	29	26	24
as__ENSG00000280987 /// ENSG00000015479 /// ENSG00000280987 /// as__ENSG00000015479	MATR3	matrin 3	645	721	616	881	596	628	626	638	793	501	476	412
as__ENSG00000283290 /// ENSG00000283418 /// ENSG00000283412 /// ENSG00000283545 /// as__ENSG00000283412 /// ENSG00000283575 /// as__ENSG00000283575	U6	U6 spliceosomal RNA	0	1	1	1	1	1	1	0	0	0	2	0
as__ENSG00000284308 /// as__ENSG00000159239 /// ENSG00000159239 /// ENSG00000284308	C2orf81	chromosome 2 open reading frame 81	59	49	53	90	54	55	65	48	62	67	45	62
ENSG00000000003	TSPAN6	tetraspanin 6	167	188	148	285	225	223	145	132	154	90	96	74
ENSG00000000419	DPM1	dolichyl-phosphate mannosyltransferase subunit 1, catalytic	398	447	320	551	319	339	369	352	516	443	488	366
ENSG00000000457	SCYL3	SCY1 like pseudokinase 3	38	45	39	56	39	41	38	42	61	26	38	21
ENSG00000000460	C1orf112	chromosome 1 open reading frame 112	109	116	65	116	83	76	95	77	134	73	73	54
ENSG00000000938	FGR	FGR proto-oncogene, Src family tyrosine kinase	0	0	0	0	0	0	0	0	0	0	0	2
ENSG00000000971	CFH	complement factor H	0	2	1	5	0	1	6	3	0	0	4	2
ENSG00000138495	COX17	COX17, cytochrome c oxidase copper chaperone	8	10	8	16	12	11	559	463	562	489	474	375
ENSG00000001084	GCLC	glutamate-cysteine ligase catalytic subunit	134	172	121	162	126	139	132	99	136	143	157	114
ENSG00000001167	NFYA	nuclear transcription factor Y subunit alpha	164	168	126	173	135	136	164	143	187	211	188	140
ENSG00000001460	STPG1	sperm tail PG-rich repeat containing 1	38	42	31	33	31	38	33	22	31	50	37	40
ENSG00000001461	NIPAL3	NIPA like domain containing 3	101	87	59	145	100	109	102	76	109	105	85	90
ENSG00000001497	LAS1L	LAS1 like, ribosome biogenesis factor	120	168	96	178	100	124	143	95	137	143	137	101
ENSG00000001561	ENPP4	ectonucleotide pyrophosphatase/phosphodiesterase 4 (putative)	1	5	0	2	0	0	0	3	1	1	2	1
ENSG00000001617	SEMA3F	semaphorin 3F	63	67	55	129	88	78	72	59	74	76	74	59
ENSG00000001626	CFTR	cystic fibrosis transmembrane conductance regulator	0	0	0	0	0	0	0	1	0	0	0	0
ENSG00000001629	ANKIB1	ankyrin repeat and IBR domain containing 1	281	314	249	420	258	265	231	198	281	263	205	197
ENSG00000001630	CYP51A1	cytochrome P450 family 51 subfamily A member 1	1	2	0	1	1	0	0	1	0	1	0	0
ENSG00000001631	KRIT1	KRIT1, ankyrin repeat containing	165	221	117	231	139	138	131	123	156	146	123	122
ENSG00000002016	RAD52	RAD52 homolog, DNA repair protein	24	39	20	50	33	26	38	29	25	53	63	43
ENSG00000002079	MYH16	myosin heavy chain 16 pseudogene	0	0	0	0	0	1	0	0	0	0	0	0
ENSG00000002330	BAD	BCL2 associated agonist of cell death	590	624	462	805	668	645	554	462	608	332	346	280
ENSG00000002549	LAP3	leucine aminopeptidase 3	103	130	77	197	143	141	107	92	138	100	101	81
ENSG00000002586	CD99	CD99 molecule (Xg blood group)	736	806	592	1282	919	984	874	593	914	766	700	558
ENSG00000002587	HS3ST1	heparan sulfate-glucosamine 3-sulfotransferase 1	0	1	0	0	0	0	0	0	0	2	0	0
ENSG00000002726	AOC1	amine oxidase, copper containing 1	0	2	0	5	0	6	0	0	1	0	0	0
ENSG00000002745	WNT16	Wnt family member 16	6	1	4	0	0	4	14	18	19	36	37	25
ENSG00000002746	HECW1	HECT, C2 and WW domain containing E3 ubiquitin protein ligase 1	4	1	2	1	3	3	1	0	1	1	1	1
ENSG00000002822	MAD1L1	MAD1 mitotic arrest deficient like 1	128	117	94	200	130	119	133	111	153	162	127	106
ENSG00000002834	LASP1	LIM and SH3 protein 1	319	326	239	480	297	336	286	232	325	277	268	204
ENSG00000002919	SNX11	sorting nexin 11	177	156	111	208	151	171	112	134	148	107	93	85
ENSG00000002933	TMEM176A	transmembrane protein 176A	1	0	0	1	0	1	0	0	0	0	0	0
ENSG00000003056	M6PR	mannose-6-phosphate receptor, cation dependent	22	30	19	52	25	34	27	31	35	19	17	9
ENSG00000003096	KLHL13	kelch like family member 13	1217	1375	1061	1710	1198	1177	957	882	1063	713	640	601
ENSG00000003137	CYP26B1	cytochrome P450 family 26 subfamily B member 1	5194	6244	4504	5000	3295	3246	6675	4969	7389	9845	8375	7377
ENSG00000003147	ICA1	islet cell autoantigen 1	475	579	424	694	483	530	360	307	428	321	233	225
ENSG00000003249	DBNDD1	dysbindin domain containing 1	278	340	230	306	282	267	298	195	289	139	145	113
ENSG00000003393	ALS2	ALS2, alsin Rho guanine nucleotide exchange factor	76	108	79	120	56	73	64	73	89	92	68	72
ENSG00000003400	CASP10	caspase 10	0	0	0	2	0	1	1	0	0	1	2	0
ENSG00000003402	CFLAR	CASP8 and FADD like apoptosis regulator	51	74	43	101	59	65	73	47	65	35	39	27
ENSG00000003436	TFPI	tissue factor pathway inhibitor	10	7	3	72	45	54	16	17	10	1	6	4
ENSG00000003509	NDUFAF7	NADH:ubiquinone oxidoreductase complex assembly factor 7	112	149	89	180	135	137	115	91	156	138	134	115
ENSG00000003756	RBM5	RNA binding motif protein 5	225	285	191	346	237	239	223	169	226	125	102	102
ENSG00000003987	MTMR7	myotubularin related protein 7	26	29	17	41	27	25	21	26	25	33	27	18
ENSG00000003989	SLC7A2	solute carrier family 7 member 2	78	96	53	350	250	257	71	72	86	104	88	72
ENSG00000004059	ARF5	ADP ribosylation factor 5	13	14	12	23	17	19	12	12	11	15	13	5
ENSG00000004139	SARM1	sterile alpha and TIR motif containing 1	228	266	148	326	243	273	234	155	227	135	137	121
ENSG00000004142	POLDIP2	DNA polymerase delta interacting protein 2	416	375	265	538	387	425	386	321	395	367	333	270
ENSG00000004399	PLXND1	plexin D1	66	99	71	135	82	99	60	44	64	89	76	57
ENSG00000004455	AK2	adenylate kinase 2	423	470	356	499	352	366	473	373	558	424	401	331
ENSG00000004468	CD38	CD38 molecule	0	0	1	1	1	0	0	3	1	0	1	0
ENSG00000004478	FKBP4	FK506 binding protein 4	549	546	432	803	576	593	651	513	708	668	625	521
ENSG00000004487	KDM1A	lysine demethylase 1A	534	621	468	641	420	439	599	460	614	609	501	455
ENSG00000004534	RBM6	RNA binding motif protein 6	287	408	265	397	272	289	351	303	320	332	273	272
ENSG00000004660	CAMKK1	calcium/calmodulin dependent protein kinase kinase 1	14	24	11	28	14	17	10	13	24	26	21	18
ENSG00000004700	RECQL	RecQ like helicase	157	171	107	225	139	148	113	109	149	108	123	103
ENSG00000004766	VPS50	VPS50, EARP/GARPII complex subunit	94	94	75	149	91	110	80	48	72	62	68	57
ENSG00000004777	ARHGAP33	Rho GTPase activating protein 33	45	76	40	67	40	51	50	28	53	57	47	41
ENSG00000004779	NDUFAB1	NADH:ubiquinone oxidoreductase subunit AB1	1042	1034	754	1139	897	887	1079	787	1137	874	784	698
ENSG00000004799	PDK4	pyruvate dehydrogenase kinase 4	0	3	2	20	18	14	5	3	7	3	2	2
ENSG00000004809	SLC22A16	solute carrier family 22 member 16	0	2	0	0	0	0	0	0	0	0	1	0
ENSG00000004838	ZMYND10	zinc finger MYND-type containing 10	3	0	0	0	0	2	0	0	0	2	1	1
ENSG00000004846	ABCB5	ATP binding cassette subfamily B member 5	0	0	0	0	0	0	0	0	0	2	0	0
ENSG00000004848	ARX	aristaless related homeobox	11	5	8	22	15	13	12	9	12	1	2	2
ENSG00000004864	SLC25A13	solute carrier family 25 member 13	198	270	191	291	237	221	179	155	201	76	61	57
ENSG00000004866	ST7	suppression of tumorigenicity 7	154	173	122	202	162	152	172	134	171	175	151	141
ENSG00000004897	CDC27	cell division cycle 27	323	364	267	411	268	279	316	258	317	253	274	216
ENSG00000004939	SLC4A1	solute carrier family 4 member 1 (Diego blood group)	6	6	5	7	6	7	9	3	7	3	4	9
ENSG00000004948	CALCR	calcitonin receptor	0	0	0	0	0	0	0	1	0	0	1	0
ENSG00000004961	HCCS	holocytochrome c synthase	119	103	83	157	131	130	128	119	146	114	95	80
ENSG00000004975	DVL2	dishevelled segment polarity protein 2	264	370	272	500	355	341	268	197	289	306	290	222
ENSG00000005001	PRSS22	protease, serine 22	14	6	6	9	5	8	6	6	13	11	16	11
ENSG00000005007	UPF1	UPF1, RNA helicase and ATPase	207	252	166	303	211	215	212	159	240	257	198	217
ENSG00000005020	SKAP2	src kinase associated phosphoprotein 2	51	64	40	87	32	41	40	29	50	79	44	52
ENSG00000005022	SLC25A5	solute carrier family 25 member 5	1657	1832	1355	1996	1352	1550	1835	1471	2000	2202	1990	1680
ENSG00000005059	MCUB	mitochondrial calcium uniporter dominant negative beta subunit	55	54	49	22	19	14	47	40	38	80	77	58
ENSG00000005075	POLR2J	RNA polymerase II subunit J	1101	1215	917	1486	1116	1216	1192	874	1289	1209	1090	969
ENSG00000005100	DHX33	DEAH-box helicase 33	96	88	96	170	118	135	78	88	119	129	111	105
ENSG00000005102	MEOX1	mesenchyme homeobox 1	0	0	0	0	0	1	0	0	0	0	0	0
ENSG00000005108	THSD7A	thrombospondin type 1 domain containing 7A	101	134	105	57	36	34	153	188	274	56	59	43
ENSG00000005156	LIG3	DNA ligase 3	48	59	50	73	37	46	64	43	60	110	72	66
ENSG00000005175	RPAP3	RNA polymerase II associated protein 3	100	104	88	148	83	103	99	99	101	102	118	85
ENSG00000005187	ACSM3	acyl-CoA synthetase medium-chain family member 3	53	56	40	75	55	60	58	44	69	57	49	43
ENSG00000005189	REXO5	RNA exonuclease 5	25	47	30	49	25	37	38	25	36	45	36	51
ENSG00000005194	CIAPIN1	cytokine induced apoptosis inhibitor 1	397	373	291	447	360	356	357	272	356	268	266	195
ENSG00000005206	SPPL2B	signal peptide peptidase like 2B	119	121	113	212	136	122	106	80	99	139	107	91
ENSG00000005238	FAM214B	family with sequence similarity 214 member B	127	136	91	202	133	125	128	98	120	66	65	74
ENSG00000005243	COPZ2	coatomer protein complex subunit zeta 2	109	130	108	273	258	218	106	72	133	43	50	43
ENSG00000005249	PRKAR2B	protein kinase cAMP-dependent type II regulatory subunit beta	248	281	205	261	189	185	258	256	319	248	218	199
ENSG00000005302	MSL3	male-specific lethal 3 homolog (Drosophila)	77	67	65	70	73	73	53	66	74	57	54	44
ENSG00000005339	CREBBP	CREB binding protein	168	198	175	293	188	191	171	137	230	147	141	124
ENSG00000005379	TSPOAP1	TSPO associated protein 1	18	11	12	42	45	31	10	11	9	11	15	5
ENSG00000005421	PON1	paraoxonase 1	4	4	1	3	6	6	6	3	7	6	10	9
ENSG00000005436	GCFC2	GC-rich sequence DNA-binding factor 2	53	76	45	92	64	70	64	48	71	60	54	47
ENSG00000005448	WDR54	WD repeat domain 54	393	410	310	471	307	346	443	304	427	386	364	327
ENSG00000005469	CROT	carnitine O-octanoyltransferase	63	81	54	98	56	79	76	71	74	49	45	22
ENSG00000048545	GUCA1A	guanylate cyclase activator 1A	2	1	4	2	4	0	101	72	118	118	109	95
ENSG00000005483	KMT2E	lysine methyltransferase 2E	289	420	271	452	279	321	227	255	357	259	218	238
ENSG00000005486	RHBDD2	rhomboid domain containing 2	785	897	664	1333	982	950	846	659	935	524	481	406
ENSG00000005513	SOX8	SRY-box 8	0	0	1	0	0	0	0	0	0	0	0	0
ENSG00000005700	IBTK	inhibitor of Bruton tyrosine kinase	68	99	72	129	74	82	75	79	92	70	69	55
ENSG00000005801	ZNF195	zinc finger protein 195	145	167	131	131	112	85	135	110	172	129	110	102
ENSG00000005810	MYCBP2	MYC binding protein 2, E3 ubiquitin protein ligase	98	129	93	213	163	155	88	97	146	103	66	69
ENSG00000005812	FBXL3	F-box and leucine rich repeat protein 3	103	124	70	104	85	72	79	74	94	78	59	66
ENSG00000005844	ITGAL	integrin subunit alpha L	0	0	1	1	0	0	1	0	1	1	2	2
ENSG00000005882	PDK2	pyruvate dehydrogenase kinase 2	33	48	49	59	56	58	58	63	65	41	34	38
ENSG00000005884	ITGA3	integrin subunit alpha 3	99	103	89	296	182	176	87	82	116	72	76	64
ENSG00000005889	ZFX	zinc finger protein, X-linked	78	79	69	114	72	79	68	53	56	51	40	26
ENSG00000005893	LAMP2	lysosomal associated membrane protein 2	289	271	234	534	348	380	257	245	320	215	223	203
ENSG00000005961	ITGA2B	integrin subunit alpha 2b	10	17	14	16	9	13	2	9	6	16	27	20
ENSG00000005981	ASB4	ankyrin repeat and SOCS box containing 4	0	0	0	0	0	0	1	1	0	0	1	1
ENSG00000006007	GDE1	glycerophosphodiester phosphodiesterase 1	306	319	243	530	389	379	269	301	336	222	203	176
ENSG00000006015	C19orf60	chromosome 19 open reading frame 60	530	555	422	657	524	522	541	446	619	397	386	310
ENSG00000006016	CRLF1	cytokine receptor like factor 1	158	199	161	130	108	105	170	119	171	137	138	122
ENSG00000006025	OSBPL7	oxysterol binding protein like 7	43	47	45	99	58	65	48	28	64	48	54	40
ENSG00000006042	TMEM98	transmembrane protein 98	729	693	540	803	604	625	661	470	664	316	243	234
ENSG00000006047	YBX2	Y-box binding protein 2	59	66	46	63	39	34	63	69	85	110	118	84
ENSG00000006062	MAP3K14	mitogen-activated protein kinase kinase kinase 14	25	27	17	33	16	30	15	11	17	19	10	17
ENSG00000006071	ABCC8	ATP binding cassette subfamily C member 8	214	232	155	879	597	591	353	277	378	48	46	40
ENSG00000006116	CACNG3	calcium voltage-gated channel auxiliary subunit gamma 3	1	0	0	0	0	0	0	0	0	0	0	0
ENSG00000006118	TMEM132A	transmembrane protein 132A	323	291	259	541	350	362	353	235	357	225	251	143
ENSG00000006125	AP2B1	adaptor related protein complex 2 beta 1 subunit	357	381	348	496	321	365	420	371	421	297	269	263
ENSG00000006128	TAC1	tachykinin precursor 1	0	0	0	0	0	1	1	0	0	0	0	0
ENSG00000006194	ZNF263	zinc finger protein 263	112	113	93	174	105	108	105	76	112	107	89	116
ENSG00000006210	CX3CL1	C-X3-C motif chemokine ligand 1	48	28	34	84	60	53	49	38	47	40	39	27
ENSG00000006282	SPATA20	spermatogenesis associated 20	424	477	362	847	556	555	395	265	449	273	249	226
ENSG00000006283	CACNA1G	calcium voltage-gated channel subunit alpha1 G	32	49	40	95	54	44	73	37	68	93	79	79
ENSG00000006327	TNFRSF12A	TNF receptor superfamily member 12A	119	120	80	226	140	151	113	97	149	108	120	84
ENSG00000006377	DLX6	distal-less homeobox 6	56	72	51	67	57	50	66	62	54	63	52	49
ENSG00000006432	MAP3K9	mitogen-activated protein kinase kinase kinase 9	47	57	56	91	66	60	72	51	66	66	52	49
ENSG00000006451	RALA	RAS like proto-oncogene A	503	525	455	613	476	465	455	448	559	495	434	376
ENSG00000006453	BAIAP2L1	BAI1 associated protein 2 like 1	21	22	22	13	9	4	27	25	28	70	65	63
ENSG00000006459	KDM7A	lysine demethylase 7A	104	125	94	139	92	101	124	89	123	142	130	97
ENSG00000006468	ETV1	ETS variant 1	103	126	108	288	170	203	129	150	179	108	73	67
ENSG00000006530	AGK	acylglycerol kinase	132	137	111	174	100	123	124	133	123	128	118	96
ENSG00000006534	ALDH3B1	aldehyde dehydrogenase 3 family member B1	24	19	16	62	41	43	15	13	16	1	3	2
ENSG00000006555	TTC22	tetratricopeptide repeat domain 22	0	1	0	1	1	1	0	0	0	0	0	0
ENSG00000006576	PHTF2	putative homeodomain transcription factor 2	142	151	99	169	132	151	131	137	153	228	206	191
ENSG00000006606	CCL26	C-C motif chemokine ligand 26	0	0	0	1	2	0	0	0	0	0	0	0
ENSG00000006607	FARP2	FERM, ARH/RhoGEF and pleckstrin domain protein 2	103	116	94	168	106	136	90	86	104	89	100	76
ENSG00000006611	USH1C	USH1 protein network component harmonin	23	28	20	59	33	49	30	29	26	13	7	8
ENSG00000006625	GGCT	gamma-glutamylcyclotransferase	395	424	325	383	311	330	399	396	496	507	453	405
ENSG00000006634	DBF4	DBF4 zinc finger	102	143	104	95	70	79	111	111	113	158	117	90
ENSG00000006638	TBXA2R	thromboxane A2 receptor	34	26	30	54	51	40	23	22	32	8	11	18
ENSG00000006652	IFRD1	interferon related developmental regulator 1	232	293	224	327	207	210	222	181	279	319	309	267
ENSG00000006695	COX10	COX10, heme A:farnesyltransferase cytochrome c oxidase assembly factor	64	67	44	69	39	52	53	48	68	63	53	47
ENSG00000006704	GTF2IRD1	GTF2I repeat domain containing 1	231	237	166	283	194	218	206	145	203	224	179	183
ENSG00000006712	PAF1	PAF1 homolog, Paf1/RNA polymerase II complex component	154	153	146	212	179	172	169	157	139	148	135	115
ENSG00000006715	VPS41	VPS41, HOPS complex subunit	326	397	298	573	412	402	326	297	353	182	138	126
ENSG00000006740	ARHGAP44	Rho GTPase activating protein 44	6	7	8	7	10	6	4	7	4	8	13	6
ENSG00000006744	ELAC2	elaC ribonuclease Z 2	216	251	176	263	193	199	213	159	240	189	204	162
ENSG00000006747	SCIN	scinderin	3	1	2	0	2	1	1	0	1	2	0	4
ENSG00000006756	ARSD	arylsulfatase D	193	213	147	348	262	299	142	139	204	63	61	62
ENSG00000006757	PNPLA4	patatin like phospholipase domain containing 4	127	141	112	157	125	138	105	65	108	130	119	100
ENSG00000006788	MYH13	myosin heavy chain 13	1	0	0	3	1	2	2	1	3	2	0	0
ENSG00000006831	ADIPOR2	adiponectin receptor 2	317	366	261	401	307	324	311	238	308	311	273	269
ENSG00000006837	CDKL3	cyclin dependent kinase like 3	29	29	23	32	28	33	27	29	32	45	30	31
ENSG00000007001	UPP2	uridine phosphorylase 2	1	1	1	1	0	0	0	0	2	2	2	0
ENSG00000007047	MARK4	microtubule affinity regulating kinase 4	291	311	210	428	273	324	292	221	355	359	346	316
ENSG00000007062	PROM1	prominin 1	3	2	4	1	1	0	1	1	10	3	3	0
ENSG00000007080	CCDC124	coiled-coil domain containing 124	400	426	278	518	376	372	423	320	478	386	366	298
ENSG00000007129	CEACAM21	carcinoembryonic antigen related cell adhesion molecule 21	0	0	0	1	0	0	0	0	0	0	0	0
ENSG00000007168	PAFAH1B1	platelet activating factor acetylhydrolase 1b regulatory subunit 1	510	665	439	648	483	463	493	398	568	394	356	301
ENSG00000007171	NOS2	nitric oxide synthase 2	1	6	0	6	2	0	3	2	2	11	9	10
ENSG00000007174	DNAH9	dynein axonemal heavy chain 9	0	0	1	0	0	0	0	0	1	4	1	1
ENSG00000007202	KIAA0100	KIAA0100	229	235	187	401	240	290	234	152	205	156	175	151
ENSG00000007216	SLC13A2	solute carrier family 13 member 2	0	0	0	2	0	0	0	0	0	0	0	0
ENSG00000007237	GAS7	growth arrest specific 7	5	5	4	16	17	17	6	12	5	14	19	14
ENSG00000007255	TRAPPC6A	trafficking protein particle complex 6A	192	232	128	210	135	152	129	89	145	205	185	166
ENSG00000007264	MATK	megakaryocyte-associated tyrosine kinase	1	3	2	2	3	0	2	3	2	11	9	5
ENSG00000007312	CD79B	CD79b molecule	5	1	3	1	1	1	2	3	3	2	2	1
ENSG00000007314	SCN4A	sodium voltage-gated channel alpha subunit 4	0	0	0	0	0	0	0	0	0	0	1	0
ENSG00000007341	ST7L	suppression of tumorigenicity 7 like	60	71	33	77	49	58	54	44	55	108	102	71
ENSG00000007350	TKTL1	transketolase like 1	0	1	1	1	0	0	0	0	0	0	1	0
ENSG00000007372	PAX6	paired box 6	0	2	0	2	0	1	1	1	0	0	0	2
ENSG00000007376	RPUSD1	RNA pseudouridylate synthase domain containing 1	114	103	72	165	138	93	130	100	132	95	95	73
ENSG00000205105	COX17P1	COX17, cytochrome c oxidase copper chaperone pseudogene 1	8	7	7	10	6	9	264	207	329	247	232	204
ENSG00000007392	LUC7L	LUC7 like	258	329	237	356	223	242	276	218	306	213	194	158
ENSG00000007402	CACNA2D2	calcium voltage-gated channel auxiliary subunit alpha2delta 2	187	276	178	461	331	340	214	140	221	195	178	152
ENSG00000007516	BAIAP3	BAI1 associated protein 3	437	453	314	551	452	452	399	311	416	343	366	313
ENSG00000007520	TSR3	TSR3, acp transferase ribosome maturation factor	14	17	13	22	22	13	13	5	11	7	9	7
ENSG00000007541	PIGQ	phosphatidylinositol glycan anchor biosynthesis class Q	197	222	147	279	227	226	167	135	172	133	142	115
ENSG00000007545	CRAMP1	cramped chromatin regulator homolog 1	36	59	29	79	48	35	37	33	44	37	30	23
ENSG00000007866	TEAD3	TEA domain transcription factor 3	90	95	69	131	104	109	103	79	118	120	109	90
ENSG00000007923	DNAJC11	DnaJ heat shock protein family (Hsp40) member C11	3	1	5	8	2	5	4	2	4	10	11	7
ENSG00000007933	FMO3	flavin containing monooxygenase 3	1	0	0	1	0	0	0	0	0	0	0	1
ENSG00000007944	MYLIP	myosin regulatory light chain interacting protein	36	51	42	112	58	78	42	38	54	66	64	51
ENSG00000007952	NOX1	NADPH oxidase 1	13	17	11	20	16	8	11	9	6	8	6	7
ENSG00000007968	E2F2	E2F transcription factor 2	33	45	21	67	54	45	51	34	50	36	29	24
ENSG00000008018	PSMB1	proteasome subunit beta 1	2089	2160	1701	2319	1748	1733	2097	1657	2239	1860	1679	1418
ENSG00000008056	SYN1	synapsin I	73	79	65	85	61	72	131	104	121	105	89	59
ENSG00000008083	JARID2	jumonji and AT-rich interaction domain containing 2	288	361	267	291	201	229	245	210	306	300	233	281
ENSG00000008086	CDKL5	cyclin dependent kinase like 5	51	65	40	59	43	44	52	42	82	67	53	52
ENSG00000008118	CAMK1G	calcium/calmodulin dependent protein kinase IG	5	3	0	9	7	3	0	0	1	1	1	1
ENSG00000008128	CDK11A	cyclin dependent kinase 11A	1	2	3	1	0	1	0	0	1	0	0	3
ENSG00000008130	NADK	NAD kinase	81	110	65	149	102	101	98	74	100	66	47	45
ENSG00000008196	TFAP2B	transcription factor AP-2 beta	176	253	223	112	67	83	229	226	253	96	91	83
ENSG00000008197	TFAP2D	transcription factor AP-2 delta	1	2	3	1	0	0	4	5	5	3	2	1
ENSG00000008226	DLEC1	deleted in lung and esophageal cancer 1	141	170	141	229	170	178	154	119	170	107	103	90
ENSG00000008256	CYTH3	cytohesin 3	341	376	287	465	332	367	249	229	299	421	362	307
ENSG00000008277	ADAM22	ADAM metallopeptidase domain 22	370	436	309	758	544	518	357	300	407	348	275	238
ENSG00000008282	SYPL1	synaptophysin like 1	212	233	182	367	323	280	171	174	228	178	155	119
ENSG00000008283	CYB561	cytochrome b561	603	789	588	514	366	400	468	366	479	163	150	150
ENSG00000008294	SPAG9	sperm associated antigen 9	277	350	275	500	329	342	288	244	349	356	339	280
ENSG00000008300	CELSR3	cadherin EGF LAG seven-pass G-type receptor 3	182	220	145	332	200	215	191	119	199	173	172	136
ENSG00000008311	AASS	aminoadipate-semialdehyde synthase	23	25	21	33	18	21	21	15	17	42	23	26
ENSG00000008323	PLEKHG6	pleckstrin homology and RhoGEF domain containing G6	3	4	1	3	2	5	4	0	0	3	2	5
ENSG00000008324	SS18L2	SS18 like 2	162	172	134	210	141	172	161	112	173	141	160	96
ENSG00000008382	MPND	MPN domain containing	211	233	152	259	198	217	208	156	223	217	204	179
ENSG00000008394	MGST1	microsomal glutathione S-transferase 1	1	1	0	0	0	1	0	0	2	1	7	2
ENSG00000008405	CRY1	cryptochrome circadian clock 1	79	79	74	59	49	47	67	79	81	93	69	52
ENSG00000008438	PGLYRP1	peptidoglycan recognition protein 1	0	0	0	0	0	0	0	0	0	1	0	0
ENSG00000008441	NFIX	nuclear factor I X	153	203	141	333	231	240	174	121	195	104	105	71
ENSG00000008513	ST3GAL1	ST3 beta-galactoside alpha-2,3-sialyltransferase 1	111	124	88	411	243	257	117	135	175	42	57	52
ENSG00000008516	MMP25	matrix metallopeptidase 25	0	1	1	3	1	2	0	0	4	2	0	4
ENSG00000008517	IL32	interleukin 32	12	18	19	29	24	25	26	9	25	17	12	15
ENSG00000008710	PKD1	polycystin 1, transient receptor potential channel interacting	119	156	114	241	120	161	116	80	134	174	200	124
ENSG00000008735	MAPK8IP2	mitogen-activated protein kinase 8 interacting protein 2	233	268	206	331	206	192	320	231	330	231	195	186
ENSG00000008838	MED24	mediator complex subunit 24	65	70	51	118	67	78	67	49	63	60	55	39
ENSG00000008853	RHOBTB2	Rho related BTB domain containing 2	44	60	38	85	62	69	64	30	58	35	48	37
ENSG00000008869	HEATR5B	HEAT repeat containing 5B	85	80	60	117	79	69	83	55	95	133	111	87
ENSG00000008952	SEC62	SEC62 homolog, preprotein translocation factor	876	974	798	1334	974	984	688	796	1054	796	672	696
ENSG00000008988	RPS20	ribosomal protein S20	9399	9619	7177	12849	9772	10237	9482	7696	10879	14555	13772	11066
ENSG00000009307	CSDE1	cold shock domain containing E1	1022	1048	819	1338	990	1137	1076	928	1198	1183	1027	858
ENSG00000009335	UBE3C	ubiquitin protein ligase E3C	237	277	204	375	278	266	218	205	251	155	142	103
ENSG00000009413	REV3L	REV3 like, DNA directed polymerase zeta catalytic subunit	54	72	66	105	59	65	74	63	96	52	45	60
ENSG00000009694	TENM1	teneurin transmembrane protein 1	9	10	4	8	6	4	9	7	13	5	2	8
ENSG00000009709	PAX7	paired box 7	0	0	0	0	0	0	0	0	0	0	1	0
ENSG00000009724	MASP2	mannan binding lectin serine peptidase 2	0	0	1	0	1	0	1	0	1	0	1	1
ENSG00000009765	IYD	iodotyrosine deiodinase	0	0	0	1	0	0	0	0	0	0	0	0
ENSG00000009780	FAM76A	family with sequence similarity 76 member A	79	83	56	70	70	65	71	62	74	74	61	61
ENSG00000009790	TRAF3IP3	TRAF3 interacting protein 3	23	22	17	35	28	25	25	15	25	35	33	22
ENSG00000009830	POMT2	protein O-mannosyltransferase 2	78	93	69	132	100	68	69	65	78	93	64	65
ENSG00000009844	VTA1	vesicle trafficking 1	248	300	236	345	265	241	224	247	305	290	251	227
ENSG00000009950	MLXIPL	MLX interacting protein like	15	26	15	27	17	13	16	7	11	25	28	23
ENSG00000009954	BAZ1B	bromodomain adjacent to zinc finger domain 1B	456	567	481	730	454	465	517	370	527	313	276	231
ENSG00000010017	RANBP9	RAN binding protein 9	335	371	243	485	309	353	335	268	337	312	261	213
ENSG00000010030	ETV7	ETS variant 7	3	8	0	4	5	2	0	2	6	1	0	2
ENSG00000010072	SPRTN	SprT-like N-terminal domain	52	73	49	73	53	56	61	63	70	65	42	24
ENSG00000010165	METTL13	methyltransferase like 13	271	285	199	361	230	235	276	217	299	247	248	171
ENSG00000010219	DYRK4	dual specificity tyrosine phosphorylation regulated kinase 4	179	193	145	250	211	183	188	136	207	197	183	132
ENSG00000010244	ZNF207	zinc finger protein 207	600	714	505	729	465	511	603	548	675	509	520	425
ENSG00000010256	UQCRC1	ubiquinol-cytochrome c reductase core protein I	709	790	584	855	620	592	761	564	723	682	609	526
ENSG00000010270	STARD3NL	STARD3 N-terminal like	600	602	501	574	390	400	484	503	647	503	437	364
ENSG00000010278	CD9	CD9 molecule	544	526	439	643	444	482	513	446	534	234	254	205
ENSG00000010282	HHATL	hedgehog acyltransferase-like	0	1	0	1	1	0	0	1	0	1	0	0
ENSG00000010292	NCAPD2	non-SMC condensin I complex subunit D2	201	267	209	297	165	184	216	232	230	405	368	317
ENSG00000010295	IFFO1	intermediate filament family orphan 1	95	110	95	152	104	110	109	67	120	92	75	62
ENSG00000010310	GIPR	gastric inhibitory polypeptide receptor	43	45	43	43	39	30	49	20	28	30	47	24
ENSG00000010318	PHF7	PHD finger protein 7	11	14	13	20	11	13	6	7	11	19	13	14
ENSG00000010319	SEMA3G	semaphorin 3G	7	6	6	15	6	8	3	3	4	1	0	2
ENSG00000010322	NISCH	nischarin	340	371	275	604	335	395	315	206	323	187	189	149
ENSG00000010327	STAB1	stabilin 1	1696	1770	1358	1762	1257	1343	1924	1350	1959	1324	1419	1048
ENSG00000010361	FUZ	fuzzy planar cell polarity protein	195	206	143	346	239	235	206	151	224	191	198	173
ENSG00000010379	SLC6A13	solute carrier family 6 member 13	1	1	1	3	3	0	2	2	0	3	2	0
ENSG00000010404	IDS	iduronate 2-sulfatase	411	472	374	639	463	485	519	420	618	463	452	345
ENSG00000010438	PRSS3	protease, serine 3	367	394	314	293	243	222	386	290	389	244	233	180
ENSG00000010539	ZNF200	zinc finger protein 200	53	64	55	74	46	41	63	54	67	58	43	46
ENSG00000010610	CD4	CD4 molecule	3	3	2	5	4	3	4	4	3	0	3	3
ENSG00000010626	LRRC23	leucine rich repeat containing 23	75	73	51	84	72	90	61	48	80	135	109	99
ENSG00000010671	BTK	Bruton tyrosine kinase	1	0	2	0	1	1	5	0	5	0	1	0
ENSG00000010704	HFE	hemochromatosis	1	0	0	0	0	0	1	0	0	0	1	1
ENSG00000010803	SCMH1	sex comb on midleg homolog 1 (Drosophila)	90	126	85	187	125	119	111	62	121	100	91	72
ENSG00000010810	FYN	FYN proto-oncogene, Src family tyrosine kinase	310	345	281	306	212	206	340	321	394	275	258	217
ENSG00000010818	HIVEP2	human immunodeficiency virus type I enhancer binding protein 2	64	56	48	105	64	71	60	40	48	39	41	38
ENSG00000010932	FMO1	flavin containing monooxygenase 1	26	27	21	28	21	19	25	22	25	24	19	12
ENSG00000011007	ELOA	elongin A	162	190	130	213	169	176	148	116	194	205	177	140
ENSG00000011009	LYPLA2	lysophospholipase II	749	793	631	851	622	672	738	594	748	385	399	333
ENSG00000011021	CLCN6	chloride voltage-gated channel 6	191	257	170	151	96	96	98	80	101	142	114	99
ENSG00000011028	MRC2	mannose receptor C type 2	861	1047	782	2112	1484	1501	978	848	1137	870	768	708
ENSG00000011105	TSPAN9	tetraspanin 9	233	219	166	395	275	290	191	162	233	132	134	103
ENSG00000011114	BTBD7	BTB domain containing 7	102	105	79	162	93	109	84	67	95	72	64	53
ENSG00000011132	APBA3	amyloid beta precursor protein binding family A member 3	122	132	98	164	132	127	92	100	106	115	141	109
ENSG00000011143	MKS1	Meckel syndrome, type 1	70	82	57	99	70	65	62	50	47	48	43	26
ENSG00000011198	ABHD5	abhydrolase domain containing 5	28	44	26	45	30	34	36	34	47	27	29	19
ENSG00000011201	ANOS1	anosmin 1	9	3	7	1	0	1	11	9	14	2	4	2
ENSG00000011243	AKAP8L	A-kinase anchoring protein 8 like	4	6	4	5	4	10	6	5	6	3	6	1
ENSG00000011258	MBTD1	mbt domain containing 1	137	147	115	183	108	107	107	98	124	146	97	86
ENSG00000011260	UTP18	UTP18, small subunit processome component	171	182	152	204	152	149	163	153	172	192	205	158
ENSG00000011275	RNF216	ring finger protein 216	335	443	296	594	364	392	279	326	430	302	248	248
ENSG00000011295	TTC19	tetratricopeptide repeat domain 19	185	222	160	290	218	190	148	150	184	166	187	130
ENSG00000011304	PTBP1	polypyrimidine tract binding protein 1	796	897	680	1060	682	764	791	600	905	911	832	700
ENSG00000011332	DPF1	double PHD fingers 1	56	85	77	120	59	81	70	63	83	36	13	27
ENSG00000011347	SYT7	synaptotagmin 7	36	43	36	49	30	30	36	21	34	41	38	29
ENSG00000011376	LARS2	leucyl-tRNA synthetase 2, mitochondrial	69	78	42	88	57	54	70	56	78	45	49	42
ENSG00000011405	PIK3C2A	phosphatidylinositol-4-phosphate 3-kinase catalytic subunit type 2 alpha	230	245	163	349	234	243	157	157	209	219	192	137
ENSG00000011422	PLAUR	plasminogen activator, urokinase receptor	52	39	36	75	64	73	50	37	65	51	38	42
ENSG00000011426	ANLN	anillin actin binding protein	166	151	135	141	97	94	138	115	151	266	226	208
ENSG00000011451	WIZ	widely interspaced zinc finger motifs	171	235	188	273	180	199	182	140	228	239	194	178
ENSG00000011454	RABGAP1	RAB GTPase activating protein 1	172	210	129	253	200	198	134	140	187	176	138	116
ENSG00000011465	DCN	decorin	350	297	288	1506	1119	1145	349	343	417	183	156	140
ENSG00000011478	QPCTL	glutaminyl-peptide cyclotransferase like	6	6	9	8	8	9	3	4	3	9	7	9
ENSG00000011485	PPP5C	protein phosphatase 5 catalytic subunit	258	271	208	330	237	229	287	224	335	227	204	171
ENSG00000011523	CEP68	centrosomal protein 68	50	79	60	117	64	70	65	57	79	66	49	55
ENSG00000011566	MAP4K3	mitogen-activated protein kinase kinase kinase kinase 3	112	104	96	173	126	109	87	75	82	98	85	83
ENSG00000011590	ZBTB32	zinc finger and BTB domain containing 32	0	1	0	0	0	0	0	0	1	0	0	0
ENSG00000011600	TYROBP	TYRO protein tyrosine kinase binding protein	0	0	0	0	1	0	1	0	0	0	1	0
ENSG00000011638	TMEM159	transmembrane protein 159	114	150	100	181	121	125	134	138	146	175	131	133
ENSG00000011677	GABRA3	gamma-aminobutyric acid type A receptor alpha3 subunit	1	2	2	6	1	3	7	5	4	2	1	4
ENSG00000012048	BRCA1	BRCA1, DNA repair associated	50	63	50	69	46	58	43	40	60	38	41	28
ENSG00000012061	ERCC1	ERCC excision repair 1, endonuclease non-catalytic subunit	257	295	209	395	290	267	244	223	272	244	256	213
ENSG00000012124	CD22	CD22 molecule	1	0	0	0	0	0	0	0	0	0	0	1
ENSG00000012171	SEMA3B	semaphorin 3B	51	79	33	184	132	130	43	27	50	67	78	59
ENSG00000012174	MBTPS2	membrane bound transcription factor peptidase, site 2	203	223	170	356	265	242	200	181	222	140	155	111
ENSG00000012211	PRICKLE3	prickle planar cell polarity protein 3	0	1	0	0	0	0	0	0	0	2	1	0
ENSG00000012223	LTF	lactotransferrin	0	0	0	0	0	0	0	0	1	1	0	0
ENSG00000012232	EXTL3	exostosin like glycosyltransferase 3	242	292	201	409	253	252	281	204	280	465	398	329
ENSG00000012504	NR1H4	nuclear receptor subfamily 1 group H member 4	0	0	0	1	0	0	0	0	0	0	0	0
ENSG00000012660	ELOVL5	ELOVL fatty acid elongase 5	999	1171	846	968	655	708	723	750	847	1218	978	898
ENSG00000012779	ALOX5	arachidonate 5-lipoxygenase	0	0	0	0	1	1	0	0	0	1	0	1
ENSG00000012817	KDM5D	lysine demethylase 5D	0	0	0	0	0	0	0	0	1	0	0	0
ENSG00000012822	CALCOCO1	calcium binding and coiled-coil domain 1	80	90	55	174	104	93	72	70	99	142	109	103
ENSG00000012963	UBR7	ubiquitin protein ligase E3 component n-recognin 7 (putative)	169	170	122	195	139	165	181	173	207	162	143	108
ENSG00000012983	MAP4K5	mitogen-activated protein kinase kinase kinase kinase 5	138	146	108	194	127	119	135	103	145	107	77	85
ENSG00000013016	EHD3	EH domain containing 3	543	645	468	778	519	564	495	497	707	152	167	120
ENSG00000013275	PSMC4	proteasome 26S subunit, ATPase 4	866	960	702	1125	782	804	878	670	955	653	639	535
ENSG00000013288	MAN2B2	mannosidase alpha class 2B member 2	61	67	54	196	130	132	78	66	84	56	41	32
ENSG00000013293	SLC7A14	solute carrier family 7 member 14	40	46	24	60	49	43	55	57	73	104	74	70
ENSG00000013297	CLDN11	claudin 11	26	44	30	71	41	72	41	42	44	55	60	42
ENSG00000013306	SLC25A39	solute carrier family 25 member 39	585	646	473	1063	795	746	670	521	716	683	642	506
ENSG00000013364	MVP	major vault protein	201	201	155	533	393	397	195	160	193	117	120	88
ENSG00000013374	NUB1	negative regulator of ubiquitin like proteins 1	410	423	317	606	422	470	395	372	418	455	503	381
ENSG00000013375	PGM3	phosphoglucomutase 3	148	165	118	264	157	168	160	130	171	277	248	213
ENSG00000013392	RWDD2A	RWD domain containing 2A	67	59	66	104	81	77	56	51	86	82	68	64
ENSG00000013441	CLK1	CDC like kinase 1	202	317	214	244	191	182	196	186	267	265	255	211
ENSG00000013503	POLR3B	RNA polymerase III subunit B	42	26	19	32	19	30	29	29	37	24	22	12
ENSG00000013523	ANGEL1	angel homolog 1	51	48	33	78	51	38	39	33	31	62	31	45
ENSG00000013561	RNF14	ring finger protein 14	200	223	188	244	182	211	170	154	204	114	89	93
ENSG00000013563	DNASE1L1	deoxyribonuclease 1 like 1	83	113	68	306	225	226	105	65	109	49	49	42
ENSG00000013573	DDX11	DEAD/H-box helicase 11	66	85	44	82	63	63	69	40	72	74	68	60
ENSG00000013583	HEBP1	heme binding protein 1	169	198	151	288	229	245	181	148	207	301	213	195
ENSG00000013588	GPRC5A	G protein-coupled receptor class C group 5 member A	66	72	50	88	70	63	55	33	36	57	49	37
ENSG00000013619	MAMLD1	mastermind like domain containing 1	2	8	1	5	0	5	5	0	8	10	2	3
ENSG00000013725	CD6	CD6 molecule	5	4	5	9	6	1	14	6	9	5	4	4
ENSG00000013810	TACC3	transforming acidic coiled-coil containing protein 3	196	230	189	229	132	142	211	174	202	316	267	239
ENSG00000014123	UFL1	UFM1 specific ligase 1	65	62	45	108	54	64	55	63	67	102	86	98
ENSG00000014138	POLA2	DNA polymerase alpha 2, accessory subunit	67	73	65	92	52	65	90	67	110	45	32	40
ENSG00000014164	ZC3H3	zinc finger CCCH-type containing 3	39	72	59	70	53	60	60	51	52	71	62	59
ENSG00000014216	CAPN1	calpain 1	463	527	425	643	454	408	335	286	405	172	172	141
ENSG00000014257	ACPP	acid phosphatase, prostate	8	8	4	9	5	8	5	1	7	2	3	3
ENSG00000014641	MDH1	malate dehydrogenase 1	1119	1264	946	1284	1061	1029	1138	946	1292	1114	907	760
ENSG00000014824	SLC30A9	solute carrier family 30 member 9	325	348	272	372	278	293	329	293	333	337	310	244
ENSG00000014914	MTMR11	myotubularin related protein 11	3	11	10	7	9	5	1	6	4	10	12	6
ENSG00000014919	COX15	COX15, cytochrome c oxidase assembly homolog	166	160	155	260	182	189	131	157	198	211	191	167
ENSG00000015133	CCDC88C	coiled-coil domain containing 88C	151	170	132	186	142	142	180	139	192	247	232	206
ENSG00000015153	YAF2	YY1 associated factor 2	167	198	136	302	198	254	134	144	168	120	91	106
ENSG00000015171	ZMYND11	zinc finger MYND-type containing 11	112	130	85	164	108	123	81	80	92	72	62	62
ENSG00000015285	WAS	Wiskott-Aldrich syndrome	4	7	6	7	7	9	9	5	4	19	22	18
ENSG00000015413	DPEP1	dipeptidase 1 (renal)	0	0	0	0	0	0	0	1	0	0	0	0
ENSG00000015475	BID	BH3 interacting domain death agonist	234	279	200	306	190	204	283	214	286	279	265	224
ENSG00000015520	NPC1L1	NPC1 like intracellular cholesterol transporter 1	2	3	0	1	0	1	0	0	0	0	4	0
ENSG00000015532	XYLT2	xylosyltransferase 2	141	156	114	281	151	187	214	163	152	137	144	109
ENSG00000015568	RGPD5	RANBP2-like and GRIP domain containing 5	19	23	13	38	17	20	30	20	25	19	19	18
ENSG00000015592	STMN4	stathmin 4	156	192	123	232	153	162	122	96	173	82	79	59
ENSG00000015676	NUDCD3	NudC domain containing 3	504	539	409	593	449	447	467	383	507	403	308	302
ENSG00000170419	VSTM2A	V-set and transmembrane domain containing 2A	0	1	1	0	1	1	27	18	19	15	20	14
ENSG00000016391	CHDH	choline dehydrogenase	23	13	9	17	8	13	17	10	19	9	12	15
ENSG00000016402	IL20RA	interleukin 20 receptor subunit alpha	96	94	80	80	45	55	47	39	50	40	37	38
ENSG00000016490	CLCA1	chloride channel accessory 1	0	0	0	0	0	0	0	0	0	0	0	1
ENSG00000016864	GLT8D1	glycosyltransferase 8 domain containing 1	207	247	195	322	261	222	184	184	266	265	237	177
ENSG00000017260	ATP2C1	ATPase secretory pathway Ca2+ transporting 1	349	398	305	511	339	335	361	325	454	382	361	298
ENSG00000017427	IGF1	insulin like growth factor 1	0	0	0	0	0	0	1	0	0	0	0	0
ENSG00000017483	SLC38A5	solute carrier family 38 member 5	0	0	0	2	2	0	0	1	1	0	1	1
ENSG00000017797	RALBP1	ralA binding protein 1	177	209	170	290	164	208	135	142	215	210	189	141
ENSG00000018189	RUFY3	RUN and FYVE domain containing 3	348	485	355	425	290	285	381	395	520	336	281	225
ENSG00000018236	CNTN1	contactin 1	826	898	742	1115	790	770	599	598	699	769	695	609
ENSG00000018280	SLC11A1	solute carrier family 11 member 1	3	6	2	7	4	8	5	6	0	7	9	2
ENSG00000018408	WWTR1	WW domain containing transcription regulator 1	168	250	167	296	211	218	172	155	211	144	140	108
ENSG00000018510	AGPS	alkylglycerone phosphate synthase	317	356	240	400	284	305	337	279	391	259	197	178
ENSG00000018610	CXorf56	chromosome X open reading frame 56	137	138	114	170	153	158	141	110	164	157	137	103
ENSG00000018625	ATP1A2	ATPase Na+/K+ transporting subunit alpha 2	0	0	0	0	0	0	0	0	0	1	1	0
ENSG00000018699	TTC27	tetratricopeptide repeat domain 27	37	47	41	98	50	59	36	37	50	71	40	29
ENSG00000018869	ZNF582	zinc finger protein 582	26	21	10	33	21	21	20	15	21	45	46	44
ENSG00000019102	VSIG2	V-set and immunoglobulin domain containing 2	3	1	1	1	1	1	4	1	1	2	2	1
ENSG00000019144	PHLDB1	pleckstrin homology like domain family B member 1	254	274	194	477	346	319	253	203	284	217	189	182
ENSG00000019186	CYP24A1	cytochrome P450 family 24 subfamily A member 1	0	0	0	0	0	0	0	0	0	0	0	1
ENSG00000019485	PRDM11	PR/SET domain 11	28	36	29	60	37	49	37	24	28	14	15	10
ENSG00000184156	KCNQ3	potassium voltage-gated channel subfamily Q member 3	1	0	0	1	0	3	10	5	12	17	9	9
ENSG00000019549	SNAI2	snail family transcriptional repressor 2	43	60	34	37	34	29	27	32	44	52	40	29
ENSG00000019582	CD74	CD74 molecule	0	0	3	6	2	5	5	1	3	10	3	2
ENSG00000019991	HGF	hepatocyte growth factor	163	168	116	558	416	378	137	128	192	102	80	60
ENSG00000019995	ZRANB1	zinc finger RANBP2-type containing 1	2	7	2	6	7	5	6	2	8	5	4	2
ENSG00000020129	NCDN	neurochondrin	80	101	79	171	122	114	92	73	116	48	58	33
ENSG00000020181	ADGRA2	adhesion G protein-coupled receptor A2	12	10	9	11	5	15	5	2	13	8	5	13
ENSG00000020256	ZFP64	ZFP64 zinc finger protein	66	82	53	95	64	53	64	63	64	66	73	44
ENSG00000020426	MNAT1	MNAT1, CDK activating kinase assembly factor	117	140	88	149	87	109	94	100	119	102	82	86
ENSG00000020577	SAMD4A	sterile alpha motif domain containing 4A	17	27	25	58	31	32	40	33	56	30	25	17
ENSG00000020633	RUNX3	runt related transcription factor 3	4	9	7	4	1	3	3	1	6	18	12	12
ENSG00000020922	MRE11	MRE11 homolog, double strand break repair nuclease	63	70	50	104	65	67	71	56	76	79	69	60
ENSG00000021300	PLEKHB1	pleckstrin homology domain containing B1	61	65	59	90	69	52	44	34	55	51	51	43
ENSG00000021355	SERPINB1	serpin family B member 1	89	103	80	130	103	127	66	46	76	44	36	31
ENSG00000021488	SLC7A9	solute carrier family 7 member 9	0	2	0	1	1	0	0	1	0	2	0	0
ENSG00000021574	SPAST	spastin	110	107	86	127	99	94	115	103	144	109	97	97
ENSG00000021645	NRXN3	neurexin 3	16	6	8	14	2	9	16	14	28	16	17	10
ENSG00000021762	OSBPL5	oxysterol binding protein like 5	59	53	44	76	52	55	51	46	40	66	42	31
ENSG00000021776	AQR	aquarius intron-binding spliceosomal factor	115	154	106	161	138	140	116	109	129	118	119	106
ENSG00000021826	CPS1	carbamoyl-phosphate synthase 1	16	26	18	52	32	38	18	27	17	18	10	12
ENSG00000022267	FHL1	four and a half LIM domains 1	553	592	482	870	608	635	573	470	550	560	470	420
ENSG00000022277	RTFDC1	replication termination factor 2 domain containing 1	384	412	302	547	368	409	368	285	393	423	428	352
ENSG00000022355	GABRA1	gamma-aminobutyric acid type A receptor alpha1 subunit	0	0	0	0	0	1	0	1	0	1	0	0
ENSG00000022556	NLRP2	NLR family pyrin domain containing 2	0	1	1	1	0	0	0	0	0	0	1	0
ENSG00000022567	SLC45A4	solute carrier family 45 member 4	28	37	19	66	46	45	48	31	41	36	46	25
ENSG00000022840	RNF10	ring finger protein 10	316	332	243	438	313	318	309	256	305	278	290	216
ENSG00000022976	ZNF839	zinc finger protein 839	65	62	43	113	54	63	68	46	69	53	49	38
ENSG00000023041	ZDHHC6	zinc finger DHHC-type containing 6	107	122	76	169	97	114	143	115	118	110	95	74
ENSG00000023171	GRAMD1B	GRAM domain containing 1B	29	37	23	38	36	33	26	24	32	21	24	29
ENSG00000023191	RNH1	ribonuclease/angiogenin inhibitor 1	355	350	276	703	486	469	370	249	398	327	301	268
ENSG00000023228	NDUFS1	NADH:ubiquinone oxidoreductase core subunit S1	285	278	238	435	272	322	260	273	335	236	184	162
ENSG00000023287	RB1CC1	RB1 inducible coiled-coil 1	165	161	126	260	156	158	120	138	154	166	181	149
ENSG00000023318	ERP44	endoplasmic reticulum protein 44	284	279	238	424	298	306	246	244	316	335	325	318
ENSG00000023330	ALAS1	5'-aminolevulinate synthase 1	178	186	152	232	141	154	182	136	178	163	177	141
ENSG00000023445	BIRC3	baculoviral IAP repeat containing 3	8	14	12	38	31	42	4	8	17	25	24	24
ENSG00000023516	AKAP11	A-kinase anchoring protein 11	63	66	55	109	61	70	69	63	70	66	69	50
ENSG00000023572	GLRX2	glutaredoxin 2	135	152	114	176	134	150	206	163	207	144	127	105
ENSG00000023608	SNAPC1	small nuclear RNA activating complex polypeptide 1	223	282	213	289	176	184	207	217	304	570	502	433
ENSG00000023697	DERA	deoxyribose-phosphate aldolase	138	173	138	239	151	157	143	123	145	113	122	94
ENSG00000023734	STRAP	serine/threonine kinase receptor associated protein	1014	1078	797	1354	900	761	1116	920	1161	998	940	732
ENSG00000023839	ABCC2	ATP binding cassette subfamily C member 2	0	1	1	0	0	1	0	3	1	0	0	0
ENSG00000023892	DEF6	DEF6, guanine nucleotide exchange factor	4	4	8	9	12	11	8	9	8	30	25	19
ENSG00000023902	PLEKHO1	pleckstrin homology domain containing O1	596	589	400	656	449	482	529	404	572	279	263	203
ENSG00000023909	GCLM	glutamate-cysteine ligase modifier subunit	164	161	131	173	112	120	128	105	159	97	111	81
ENSG00000024048	UBR2	ubiquitin protein ligase E3 component n-recognin 2	52	78	55	126	76	69	40	52	62	85	68	51
ENSG00000024422	EHD2	EH domain containing 2	317	350	264	825	567	629	178	116	209	73	72	57
ENSG00000024526	DEPDC1	DEP domain containing 1	116	138	123	101	63	56	118	105	136	197	192	158
ENSG00000024862	CCDC28A	coiled-coil domain containing 28A	75	84	65	136	83	84	52	51	56	142	135	113
ENSG00000025039	RRAGD	Ras related GTP binding D	167	167	129	203	137	131	176	117	165	190	144	116
ENSG00000025156	HSF2	heat shock transcription factor 2	128	148	108	206	129	131	132	115	162	213	170	141
ENSG00000025293	PHF20	PHD finger protein 20	303	295	216	438	279	296	235	234	262	309	267	260
ENSG00000025423	HSD17B6	hydroxysteroid 17-beta dehydrogenase 6	31	26	20	41	18	30	17	15	26	39	32	26
ENSG00000025434	NR1H3	nuclear receptor subfamily 1 group H member 3	29	22	31	20	25	18	24	14	20	31	37	32
ENSG00000025708	TYMP	thymidine phosphorylase	47	53	41	110	74	84	37	27	63	26	42	27
ENSG00000025770	NCAPH2	non-SMC condensin II complex subunit H2	147	155	114	186	123	109	117	93	116	137	102	75
ENSG00000025772	TOMM34	translocase of outer mitochondrial membrane 34	196	203	153	306	219	246	219	158	224	201	185	160
ENSG00000025796	SEC63	SEC63 homolog, protein translocation regulator	313	385	275	468	328	360	311	293	408	400	319	304
ENSG00000025800	KPNA6	karyopherin subunit alpha 6	452	526	431	804	538	610	359	395	563	432	349	320
ENSG00000026025	VIM	vimentin	3756	3976	3143	6547	4636	5121	3375	3014	3645	2690	2412	1982
ENSG00000026036	RTEL1-TNFRSF6B	RTEL1-TNFRSF6B readthrough (NMD candidate)	49	54	42	81	69	62	76	31	58	44	52	35
ENSG00000026103	FAS	Fas cell surface death receptor	6	16	7	28	20	26	9	7	13	6	3	8
ENSG00000153823	PID1	phosphotyrosine interaction domain containing 1	2	1	0	5	3	7	23	7	17	10	5	12
ENSG00000026508	CD44	CD44 molecule (Indian blood group)	59	56	52	102	59	70	58	51	62	25	45	30
ENSG00000026559	KCNG1	potassium voltage-gated channel modifier subfamily G member 1	121	142	100	183	109	106	175	113	147	91	90	76
ENSG00000026652	AGPAT4	1-acylglycerol-3-phosphate O-acyltransferase 4	153	200	129	164	107	107	177	142	210	196	172	175
ENSG00000026950	BTN3A1	butyrophilin subfamily 3 member A1	70	83	52	164	120	108	61	66	71	98	83	73
ENSG00000027001	MIPEP	mitochondrial intermediate peptidase	22	23	14	43	30	25	17	12	32	14	20	10
ENSG00000027075	PRKCH	protein kinase C eta	327	419	274	364	214	278	313	199	313	137	112	95
ENSG00000027644	INSRR	insulin receptor related receptor	26	34	15	49	37	28	25	18	26	26	13	14
ENSG00000027697	IFNGR1	interferon gamma receptor 1	270	285	226	333	209	200	270	202	249	423	347	317
ENSG00000027847	B4GALT7	beta-1,4-galactosyltransferase 7	86	82	56	164	96	83	109	65	116	68	62	52
ENSG00000027869	SH2D2A	SH2 domain containing 2A	0	0	0	0	1	1	0	0	0	0	0	1
ENSG00000028137	TNFRSF1B	TNF receptor superfamily member 1B	3	5	8	16	7	7	14	5	7	11	12	9
ENSG00000028203	VEZT	vezatin, adherens junctions transmembrane protein	328	327	269	436	283	285	264	243	298	207	186	155
ENSG00000028277	POU2F2	POU class 2 homeobox 2	86	127	85	118	74	101	66	40	72	29	28	19
ENSG00000028310	BRD9	bromodomain containing 9	160	205	131	212	158	151	134	141	201	153	111	113
ENSG00000028528	SNX1	sorting nexin 1	413	459	348	551	396	414	384	296	416	384	300	253
ENSG00000028839	TBPL1	TATA-box binding protein like 1	301	301	248	322	258	252	327	290	321	366	333	310
ENSG00000029153	ARNTL2	aryl hydrocarbon receptor nuclear translocator like 2	78	74	59	108	72	79	60	58	63	43	44	44
ENSG00000029363	BCLAF1	BCL2 associated transcription factor 1	214	273	189	332	225	259	292	234	309	140	106	109
ENSG00000029364	SLC39A9	solute carrier family 39 member 9	310	377	272	564	386	364	368	310	398	405	362	339
ENSG00000029534	ANK1	ankyrin 1	11	9	8	6	3	5	14	4	6	8	6	7
ENSG00000029639	TFB1M	transcription factor B1, mitochondrial	38	56	45	59	27	35	31	39	32	55	55	48
ENSG00000029725	RABEP1	rabaptin, RAB GTPase binding effector protein 1	223	269	202	271	190	218	204	180	236	199	162	150
ENSG00000029993	HMGB3	high mobility group box 3	275	316	251	266	192	208	281	243	342	255	187	191
ENSG00000030066	NUP160	nucleoporin 160	198	208	159	294	174	202	181	170	210	193	175	149
ENSG00000187094	CCK	cholecystokinin	2	1	1	1	1	3	12	8	16	19	19	15
ENSG00000030304	MUSK	muscle associated receptor tyrosine kinase	0	0	0	1	0	0	0	0	0	0	0	1
ENSG00000030419	IKZF2	IKAROS family zinc finger 2	7	10	7	20	8	6	5	8	7	13	6	12
ENSG00000030582	GRN	granulin precursor	1039	1133	814	2339	1784	1746	1004	874	1142	925	844	770
ENSG00000031003	FAM13B	family with sequence similarity 13 member B	196	184	144	331	226	249	170	116	223	74	81	60
ENSG00000031081	ARHGAP31	Rho GTPase activating protein 31	216	229	178	328	227	215	231	223	275	186	187	138
ENSG00000031691	CENPQ	centromere protein Q	57	31	34	44	40	25	30	35	27	65	70	42
ENSG00000031698	SARS	seryl-tRNA synthetase	523	614	434	644	459	474	570	422	583	455	439	369
ENSG00000031823	RANBP3	RAN binding protein 3	182	216	141	291	184	192	178	144	205	151	148	138
ENSG00000032219	ARID4A	AT-rich interaction domain 4A	69	105	72	148	70	93	51	65	85	62	45	57
ENSG00000032389	TSSC1	tumor suppressing subtransferable candidate 1	243	258	187	276	187	199	210	166	246	224	188	179
ENSG00000032444	PNPLA6	patatin like phospholipase domain containing 6	201	227	166	362	247	218	178	146	207	178	156	129
ENSG00000032742	IFT88	intraflagellar transport 88	67	53	48	74	58	60	42	45	59	52	44	28
ENSG00000033011	ALG1	ALG1, chitobiosyldiphosphodolichol beta-mannosyltransferase	78	59	54	95	82	73	69	58	71	56	43	36
ENSG00000033030	ZCCHC8	zinc finger CCHC-type containing 8	67	76	62	86	48	81	71	58	76	55	53	31
ENSG00000033050	ABCF2	ATP binding cassette subfamily F member 2	226	251	176	378	259	277	256	213	270	227	188	188
ENSG00000033100	CHPF2	chondroitin polymerizing factor 2	300	357	238	562	352	367	387	266	317	290	280	210
ENSG00000033122	LRRC7	leucine rich repeat containing 7	3	4	2	7	5	4	1	3	8	2	4	5
ENSG00000033170	FUT8	fucosyltransferase 8	127	135	83	143	90	93	140	124	134	142	123	96
ENSG00000033178	UBA6	ubiquitin like modifier activating enzyme 6	128	145	108	213	132	144	131	135	144	120	134	110
ENSG00000033327	GAB2	GRB2 associated binding protein 2	560	698	503	889	615	618	530	353	543	695	710	565
ENSG00000033627	ATP6V0A1	ATPase H+ transporting V0 subunit a1	318	369	290	392	266	233	310	213	339	199	259	188
ENSG00000033800	PIAS1	protein inhibitor of activated STAT 1	143	165	136	192	157	141	142	162	190	241	172	176
ENSG00000033867	SLC4A7	solute carrier family 4 member 7	76	96	93	134	68	90	93	75	105	217	163	147
ENSG00000034053	APBA2	amyloid beta precursor protein binding family A member 2	296	300	240	365	228	213	285	215	305	200	169	160
ENSG00000034152	MAP2K3	mitogen-activated protein kinase kinase 3	95	103	85	166	143	128	79	69	109	53	45	49
ENSG00000034239	EFCAB1	EF-hand calcium binding domain 1	1	2	0	0	0	0	0	0	0	7	9	11
ENSG00000034510	TMSB10	thymosin beta 10	12033	13211	10232	12458	10074	10375	12455	9547	13892	9632	8518	7549
ENSG00000034533	ASTE1	asteroid homolog 1 (Drosophila)	22	20	22	34	21	25	22	19	26	21	16	18
ENSG00000034677	RNF19A	ring finger protein 19A, RBR E3 ubiquitin protein ligase	71	87	61	93	75	68	63	72	90	72	53	70
ENSG00000034693	PEX3	peroxisomal biogenesis factor 3	58	42	31	51	34	37	30	28	36	26	35	28
ENSG00000034713	GABARAPL2	GABA type A receptor associated protein like 2	1495	1493	1193	1760	1397	1341	1543	1215	1688	1538	1446	1131
ENSG00000035115	SH3YL1	SH3 and SYLF domain containing 1	69	67	56	74	61	62	48	51	50	87	83	49
ENSG00000035141	FAM136A	family with sequence similarity 136 member A	203	229	191	291	235	209	226	167	227	180	190	151
ENSG00000035403	VCL	vinculin	367	436	377	606	426	387	381	350	394	429	400	301
ENSG00000035499	DEPDC1B	DEP domain containing 1B	69	97	79	88	52	61	71	53	83	92	94	73
ENSG00000035664	DAPK2	death associated protein kinase 2	19	13	13	16	14	10	10	7	7	7	14	2
ENSG00000035681	NSMAF	neutral sphingomyelinase activation associated factor	54	61	40	104	58	43	45	33	41	27	23	24
ENSG00000035687	ADSS	adenylosuccinate synthase	94	85	82	144	92	107	101	89	108	83	66	56
ENSG00000035720	STAP1	signal transducing adaptor family member 1	0	1	1	0	0	0	0	0	0	0	0	1
ENSG00000035862	TIMP2	TIMP metallopeptidase inhibitor 2	2069	2442	1850	4340	2996	3161	2438	1989	2710	2148	1905	1649
ENSG00000035928	RFC1	replication factor C subunit 1	138	152	107	223	139	143	140	116	157	213	153	129
ENSG00000036054	TBC1D23	TBC1 domain family member 23	88	104	68	128	82	84	86	70	82	147	144	116
ENSG00000036257	CUL3	cullin 3	57	68	54	87	56	55	69	50	72	69	53	62
ENSG00000036448	MYOM2	myomesin 2	5	2	2	4	1	3	4	0	5	6	4	4
ENSG00000036473	OTC	ornithine carbamoyltransferase	0	2	1	0	1	2	1	0	0	0	2	0
ENSG00000036530	CYP46A1	cytochrome P450 family 46 subfamily A member 1	3	2	6	6	9	6	2	3	0	4	2	3
ENSG00000036549	ZZZ3	zinc finger ZZ-type containing 3	108	117	118	204	109	127	97	104	99	127	82	89
ENSG00000036565	SLC18A1	solute carrier family 18 member A1	210	230	191	186	122	138	245	221	321	61	35	33
ENSG00000036672	USP2	ubiquitin specific peptidase 2	58	79	60	129	60	89	81	69	82	124	106	118
ENSG00000036828	CASR	calcium sensing receptor	1	0	0	1	0	0	0	1	0	0	0	0
ENSG00000037042	TUBG2	tubulin gamma 2	96	97	73	158	86	104	119	52	126	132	124	96
ENSG00000037241	RPL26L1	ribosomal protein L26 like 1	281	300	251	338	230	284	270	237	320	275	256	232
ENSG00000037280	FLT4	fms related tyrosine kinase 4	0	0	0	0	0	0	3	0	0	1	0	4
ENSG00000037474	NSUN2	NOP2/Sun RNA methyltransferase family member 2	162	165	126	225	129	131	161	133	144	140	130	92
ENSG00000037637	FBXO42	F-box protein 42	96	134	92	137	94	107	83	77	102	71	65	67
ENSG00000037749	MFAP3	microfibrillar associated protein 3	21	24	13	24	19	10	29	13	24	13	18	12
ENSG00000037757	MRI1	methylthioribose-1-phosphate isomerase 1	4	10	8	13	7	4	6	5	11	6	2	3
ENSG00000037897	METTL1	methyltransferase like 1	26	40	23	51	32	47	41	26	43	60	46	43
ENSG00000037965	HOXC8	homeobox C8	26	28	17	26	11	26	11	19	28	24	11	8
ENSG00000038002	AGA	aspartylglucosaminidase	108	113	90	238	178	207	119	107	130	55	80	57
ENSG00000038210	PI4K2B	phosphatidylinositol 4-kinase type 2 beta	24	26	16	33	17	31	15	20	25	20	16	13
ENSG00000038219	BOD1L1	biorientation of chromosomes in cell division 1 like 1	240	344	297	552	324	385	193	234	342	379	264	312
ENSG00000038274	MAT2B	methionine adenosyltransferase 2B	311	332	295	454	285	284	270	292	344	281	270	201
ENSG00000038295	TLL1	tolloid like 1	0	0	2	0	0	0	1	0	0	0	0	0
ENSG00000038358	EDC4	enhancer of mRNA decapping 4	3	4	2	11	8	6	3	4	1	4	5	3
ENSG00000038382	TRIO	trio Rho guanine nucleotide exchange factor	481	721	515	911	641	652	626	459	592	334	271	237
ENSG00000038427	VCAN	versican	198	278	168	271	170	183	330	285	415	144	111	106
ENSG00000038532	CLEC16A	C-type lectin domain containing 16A	70	93	56	127	100	99	70	61	85	99	89	88
ENSG00000039068	CDH1	cadherin 1	4	10	2	4	5	3	3	2	4	7	3	9
ENSG00000039123	SKIV2L2	Ski2 like RNA helicase 2	51	65	50	80	60	63	41	52	83	62	52	44
ENSG00000039139	DNAH5	dynein axonemal heavy chain 5	1	0	1	0	3	1	1	1	0	4	1	1
ENSG00000039319	ZFYVE16	zinc finger FYVE-type containing 16	146	163	130	198	132	143	135	114	148	110	118	96
ENSG00000039523	RIPOR1	RHO family interacting cell polarization regulator 1	280	309	247	459	321	308	289	224	306	208	203	198
ENSG00000039537	C6	complement C6	4	5	6	27	9	11	2	6	4	6	3	4
ENSG00000039560	RAI14	retinoic acid induced 14	70	71	49	151	97	95	86	60	80	57	42	49
ENSG00000039600	SOX30	SRY-box 30	0	1	0	0	0	0	0	1	0	4	4	6
ENSG00000039650	PNKP	polynucleotide kinase 3'-phosphatase	232	209	168	265	193	185	200	164	197	273	291	215
ENSG00000039987	BEST2	bestrophin 2	1	1	0	1	0	0	0	0	0	0	0	0
ENSG00000040199	PHLPP2	PH domain and leucine rich repeat protein phosphatase 2	17	32	20	32	25	19	23	10	22	21	18	19
ENSG00000040275	SPDL1	spindle apparatus coiled-coil protein 1	122	139	109	136	121	113	95	92	145	120	102	93
ENSG00000040341	STAU2	staufen double-stranded RNA binding protein 2	217	244	199	465	318	310	218	234	291	283	199	217
ENSG00000040487	PQLC2	PQ loop repeat containing 2	76	93	61	102	74	71	69	50	52	42	40	47
ENSG00000040531	CTNS	cystinosin, lysosomal cystine transporter	53	59	54	103	67	71	62	38	59	42	32	49
ENSG00000040608	RTN4R	reticulon 4 receptor	53	69	47	42	26	33	29	21	36	34	40	18
ENSG00000040633	PHF23	PHD finger protein 23	364	403	301	512	331	386	336	292	389	179	156	175
ENSG00000040731	CDH10	cadherin 10	0	0	1	0	0	0	0	0	0	0	0	0
ENSG00000040933	INPP4A	inositol polyphosphate-4-phosphatase type I A	128	138	103	177	136	127	106	91	138	132	123	72
ENSG00000041353	RAB27B	RAB27B, member RAS oncogene family	57	56	47	47	37	21	42	42	45	37	39	32
ENSG00000041357	PSMA4	proteasome subunit alpha 4	1360	1401	989	1403	1045	1071	1230	1156	1567	1023	917	705
ENSG00000041515	MYO16	myosin XVI	45	47	34	29	19	21	30	21	18	19	35	24
ENSG00000041802	LSG1	large 60S subunit nuclear export GTPase 1	87	101	91	159	98	101	80	89	129	101	96	92
ENSG00000041880	PARP3	poly(ADP-ribose) polymerase family member 3	26	33	22	63	47	40	25	18	33	16	19	13
ENSG00000041982	TNC	tenascin C	14	11	8	63	31	42	34	31	39	12	9	13
ENSG00000041988	THAP3	THAP domain containing 3	214	250	188	306	234	238	285	189	271	206	214	155
ENSG00000042062	RIPOR3	RIPOR family member 3	6	9	9	8	5	5	4	2	5	3	6	4
ENSG00000042088	TDP1	tyrosyl-DNA phosphodiesterase 1	72	65	56	78	43	51	76	59	66	113	92	70
ENSG00000042286	AIFM2	apoptosis inducing factor, mitochondria associated 2	62	82	41	91	69	67	73	49	74	56	44	34
ENSG00000042317	SPATA7	spermatogenesis associated 7	37	33	33	53	47	49	39	36	32	52	48	54
ENSG00000042429	MED17	mediator complex subunit 17	37	41	36	49	30	28	30	28	37	33	18	19
ENSG00000042445	RETSAT	retinol saturase	275	328	247	357	272	295	283	214	278	161	146	128
ENSG00000042493	CAPG	capping actin protein, gelsolin like	5	9	4	14	18	8	4	3	4	11	16	11
ENSG00000042753	AP2S1	adaptor related protein complex 2 sigma 1 subunit	1428	1582	1167	2034	1568	1572	1668	1381	1792	1367	1265	994
ENSG00000042781	USH2A	usherin	1	2	4	9	4	2	4	1	4	5	8	1
ENSG00000042832	TG	thyroglobulin	1	1	1	1	1	1	1	0	0	0	1	0
ENSG00000042980	ADAM28	ADAM metallopeptidase domain 28	0	0	0	0	0	0	0	1	0	0	0	0
ENSG00000043039	BARX2	BARX homeobox 2	0	0	0	0	0	0	0	0	0	1	1	0
ENSG00000043093	DCUN1D1	defective in cullin neddylation 1 domain containing 1	130	156	128	189	138	132	164	135	174	120	94	99
ENSG00000043143	JADE2	jade family PHD finger 2	89	72	66	270	174	178	72	66	82	85	78	60
ENSG00000043355	ZIC2	Zic family member 2	44	39	32	2	0	2	40	36	31	1	3	0
ENSG00000043462	LCP2	lymphocyte cytosolic protein 2	1	0	1	0	0	0	5	1	3	0	0	2
ENSG00000043514	TRIT1	tRNA isopentenyltransferase 1	57	77	60	89	45	57	58	50	63	61	56	53
ENSG00000043591	ADRB1	adrenoceptor beta 1	0	3	0	0	0	0	0	0	2	0	2	1
ENSG00000044090	CUL7	cullin 7	169	189	174	332	221	222	156	123	168	253	239	222
ENSG00000044115	CTNNA1	catenin alpha 1	962	1087	806	1386	877	868	987	799	998	928	755	677
ENSG00000044446	PHKA2	phosphorylase kinase regulatory subunit alpha 2	37	38	30	78	35	35	43	30	39	45	25	32
ENSG00000044459	CNTLN	centlein	75	86	62	126	82	78	73	72	68	70	67	62
ENSG00000044524	EPHA3	EPH receptor A3	0	0	0	0	0	0	1	0	0	0	0	0
ENSG00000044574	HSPA5	heat shock protein family A (Hsp70) member 5	2144	2513	1911	2057	1463	1522	2382	2037	2695	1241	1082	911
ENSG00000046604	DSG2	desmoglein 2	2	3	0	1	1	3	3	2	1	10	11	4
ENSG00000046647	GEMIN8	gem nuclear organelle associated protein 8	80	107	71	152	111	104	106	67	115	228	164	139
ENSG00000046651	OFD1	OFD1, centriole and centriolar satellite protein	67	82	74	126	111	70	85	64	73	79	71	72
ENSG00000046653	GPM6B	glycoprotein M6B	155	197	144	178	104	125	152	156	189	76	94	65
ENSG00000166206	GABRB3	gamma-aminobutyric acid type A receptor beta3 subunit	23	21	15	24	11	13	161	129	180	175	143	129
ENSG00000047056	WDR37	WD repeat domain 37	58	69	51	75	43	50	47	41	56	50	42	29
ENSG00000047188	YTHDC2	YTH domain containing 2	40	57	60	83	41	60	61	29	49	48	29	31
ENSG00000047230	CTPS2	CTP synthase 2	92	85	73	113	83	82	78	70	89	58	54	38
ENSG00000047249	ATP6V1H	ATPase H+ transporting V1 subunit H	198	279	189	380	261	275	210	196	245	124	101	84
ENSG00000047315	POLR2B	RNA polymerase II subunit B	24	37	22	67	41	46	21	27	44	48	37	43
ENSG00000047346	FAM214A	family with sequence similarity 214 member A	79	102	78	137	76	79	71	66	84	61	53	50
ENSG00000047410	TPR	translocated promoter region, nuclear basket protein	85	92	72	179	94	128	59	60	75	70	57	68
ENSG00000047457	CP	ceruloplasmin	109	153	95	178	126	102	91	123	103	104	91	86
ENSG00000047578	KIAA0556	KIAA0556	30	33	19	55	30	43	28	19	31	37	25	23
ENSG00000047579	DTNBP1	dystrobrevin binding protein 1	124	158	107	157	142	120	124	97	159	137	119	103
ENSG00000047597	XK	X-linked Kx blood group	6	4	0	3	2	3	7	6	9	2	5	0
ENSG00000047621	C12orf4	chromosome 12 open reading frame 4	77	66	42	73	55	52	60	60	47	27	22	19
ENSG00000047634	SCML1	sex comb on midleg like 1 (Drosophila)	94	94	94	111	84	77	63	77	85	84	89	46
ENSG00000047644	WWC3	WWC family member 3	60	86	68	107	77	59	52	57	81	84	61	58
ENSG00000047648	ARHGAP6	Rho GTPase activating protein 6	12	18	13	13	13	14	15	10	15	7	7	5
ENSG00000047662	FAM184B	family with sequence similarity 184 member B	0	0	0	1	0	1	0	0	0	6	1	3
ENSG00000047849	MAP4	microtubule associated protein 4	549	715	482	894	589	582	543	442	609	691	563	500
ENSG00000047932	GOPC	golgi associated PDZ and coiled-coil motif containing	122	182	118	212	140	142	106	94	133	147	137	104
ENSG00000048028	USP28	ubiquitin specific peptidase 28	63	71	54	95	64	65	69	41	59	67	58	55
ENSG00000048052	HDAC9	histone deacetylase 9	116	160	104	202	135	137	164	147	198	151	106	105
ENSG00000048140	TSPAN17	tetraspanin 17	254	310	207	356	262	267	245	202	278	226	191	158
ENSG00000048162	NOP16	NOP16 nucleolar protein	139	189	138	180	175	194	146	134	202	135	119	115
ENSG00000048342	CC2D2A	coiled-coil and C2 domain containing 2A	34	30	33	70	35	41	33	36	56	36	26	22
ENSG00000048392	RRM2B	ribonucleotide reductase regulatory TP53 inducible subunit M2B	94	110	78	167	119	110	104	85	112	160	109	87
ENSG00000048405	ZNF800	zinc finger protein 800	61	76	58	80	58	59	54	40	52	56	53	54
ENSG00000048462	TNFRSF17	TNF receptor superfamily member 17	0	0	0	0	0	1	0	0	1	0	0	0
ENSG00000048471	SNX29	sorting nexin 29	68	76	67	112	81	87	49	54	76	61	48	42
ENSG00000048540	LMO3	LIM domain only 3	17	11	10	2	1	3	30	33	37	11	11	16
ENSG00000048544	MRPS10	mitochondrial ribosomal protein S10	247	244	194	334	233	246	257	200	254	261	249	192
ENSG00000197614	MFAP5	microfibrillar associated protein 5	4	1	0	92	80	66	14	12	12	9	6	4
ENSG00000048649	RSF1	remodeling and spacing factor 1	282	367	275	537	310	380	213	250	448	190	161	149
ENSG00000048707	VPS13D	vacuolar protein sorting 13 homolog D	598	679	446	825	549	553	576	465	622	617	518	467
ENSG00000048740	CELF2	CUGBP Elav-like family member 2	3	3	3	3	2	2	3	3	6	2	6	1
ENSG00000048828	FAM120A	family with sequence similarity 120A	151	199	138	332	180	240	128	141	172	88	90	97
ENSG00000048991	R3HDM1	R3H domain containing 1	91	92	88	120	94	84	88	87	111	112	91	84
ENSG00000049089	COL9A2	collagen type IX alpha 2 chain	32	44	31	44	24	33	19	11	26	54	49	42
ENSG00000049130	KITLG	KIT ligand	37	43	38	60	37	37	62	63	64	45	38	27
ENSG00000049167	ERCC8	ERCC excision repair 8, CSA ubiquitin ligase complex subunit	67	76	50	61	51	56	63	49	64	49	52	38
ENSG00000049192	ADAMTS6	ADAM metallopeptidase with thrombospondin type 1 motif 6	21	21	15	11	9	11	6	7	12	6	8	11
ENSG00000049239	H6PD	hexose-6-phosphate dehydrogenase/glucose 1-dehydrogenase	243	253	219	523	373	360	267	182	260	261	225	198
ENSG00000049245	VAMP3	vesicle associated membrane protein 3	252	294	220	530	368	402	227	189	221	227	218	165
ENSG00000049246	PER3	period circadian clock 3	27	26	18	24	24	22	15	8	13	32	27	27
ENSG00000049247	UTS2	urotensin 2	0	1	1	1	0	0	0	0	0	2	0	1
ENSG00000049249	TNFRSF9	TNF receptor superfamily member 9	14	10	13	28	23	21	15	13	21	22	19	18
ENSG00000049283	EPN3	epsin 3	3	3	3	10	11	12	6	2	4	3	1	2
ENSG00000049323	LTBP1	latent transforming growth factor beta binding protein 1	95	132	89	213	162	146	184	149	189	68	52	61
ENSG00000049449	RCN1	reticulocalbin 1	203	230	202	274	190	203	153	157	248	177	158	159
ENSG00000049540	ELN	elastin	116	130	95	78	49	59	253	229	324	88	74	69
ENSG00000049541	RFC2	replication factor C subunit 2	241	274	216	288	253	224	276	189	316	224	200	168
ENSG00000049618	ARID1B	AT-rich interaction domain 1B	145	211	139	264	195	190	133	151	226	137	100	86
ENSG00000049656	CLPTM1L	CLPTM1 like	463	511	407	761	502	541	428	410	489	397	300	293
ENSG00000049759	NEDD4L	neural precursor cell expressed, developmentally down-regulated 4-like, E3 ubiquitin protein ligase	163	193	146	220	174	161	181	112	190	226	198	182
ENSG00000049768	FOXP3	forkhead box P3	21	36	21	33	23	11	20	23	31	19	23	20
ENSG00000049769	PPP1R3F	protein phosphatase 1 regulatory subunit 3F	104	114	93	124	109	86	105	62	96	116	88	95
ENSG00000049860	HEXB	hexosaminidase subunit beta	113	119	88	209	179	171	102	85	143	122	119	113
ENSG00000049883	PTCD2	pentatricopeptide repeat domain 2	39	52	50	69	52	52	43	41	52	69	64	43
ENSG00000050030	KIAA2022	KIAA2022	1	1	1	2	1	0	1	3	6	4	5	1
ENSG00000050130	JKAMP	JNK1/MAPK8-associated membrane protein	286	331	226	415	285	327	286	265	319	236	201	158
ENSG00000050165	DKK3	dickkopf WNT signaling pathway inhibitor 3	602	640	503	1220	981	943	665	632	795	485	465	368
ENSG00000050344	NFE2L3	nuclear factor, erythroid 2 like 3	88	98	79	192	161	161	75	84	137	97	91	74
ENSG00000050393	MCUR1	mitochondrial calcium uniporter regulator 1	197	218	169	273	185	190	245	187	261	267	241	190
ENSG00000050405	LIMA1	LIM domain and actin binding 1	231	210	206	248	166	165	180	158	208	164	150	111
ENSG00000050426	LETMD1	LETM1 domain containing 1	168	193	169	308	215	219	189	139	190	443	361	317
ENSG00000050438	SLC4A8	solute carrier family 4 member 8	260	332	254	380	270	288	275	221	359	245	221	208
ENSG00000050555	LAMC3	laminin subunit gamma 3	3	0	0	2	1	0	3	1	3	2	1	5
ENSG00000050628	PTGER3	prostaglandin E receptor 3	16	20	20	29	14	15	10	10	11	7	14	15
ENSG00000050730	TNIP3	TNFAIP3 interacting protein 3	1	0	0	1	1	0	1	0	0	0	1	1
ENSG00000050748	MAPK9	mitogen-activated protein kinase 9	151	192	148	254	164	157	181	153	208	135	127	102
ENSG00000050767	COL23A1	collagen type XXIII alpha 1 chain	3	3	2	7	3	5	15	25	16	87	70	86
ENSG00000050820	BCAR1	BCAR1, Cas family scaffolding protein	325	316	271	406	250	310	266	251	333	167	176	121
ENSG00000051009	FAM160A2	family with sequence similarity 160 member A2	48	82	46	90	65	55	52	49	49	58	71	48
ENSG00000051108	HERPUD1	homocysteine inducible ER protein with ubiquitin like domain 1	414	498	375	370	283	303	548	403	578	256	253	226
ENSG00000051128	HOMER3	homer scaffolding protein 3	239	252	207	336	247	236	232	163	217	134	119	122
ENSG00000051180	RAD51	RAD51 recombinase	60	64	43	90	52	50	54	55	57	40	49	43
ENSG00000051341	POLQ	DNA polymerase theta	13	17	17	12	10	15	12	17	13	16	15	7
ENSG00000051382	PIK3CB	phosphatidylinositol-4,5-bisphosphate 3-kinase catalytic subunit beta	29	54	33	58	40	35	52	28	42	47	38	32
ENSG00000051523	CYBA	cytochrome b-245 alpha chain	496	522	378	503	379	386	672	515	740	786	700	638
ENSG00000051596	THOC3	THO complex 3	113	153	77	135	66	94	139	102	145	174	174	113
ENSG00000051620	HEBP2	heme binding protein 2	376	404	322	264	206	191	292	209	318	243	198	153
ENSG00000051825	MPHOSPH9	M-phase phosphoprotein 9	94	93	83	146	89	99	105	96	143	153	108	117
ENSG00000052126	PLEKHA5	pleckstrin homology domain containing A5	61	57	42	119	78	80	39	43	65	43	32	41
ENSG00000052344	PRSS8	protease, serine 8	5	7	5	6	4	4	1	1	2	0	0	0
ENSG00000052723	SIKE1	suppressor of IKBKE 1	188	211	145	246	132	177	212	161	227	388	390	319
ENSG00000052749	RRP12	ribosomal RNA processing 12 homolog	91	100	71	125	106	85	73	75	78	156	127	139
ENSG00000052795	FNIP2	folliculin interacting protein 2	137	203	150	272	191	223	125	144	224	99	74	88
ENSG00000052802	MSMO1	methylsterol monooxygenase 1	1598	1788	1419	721	463	489	528	435	571	694	610	515
ENSG00000052841	TTC17	tetratricopeptide repeat domain 17	239	266	205	427	337	315	200	155	231	354	290	265
ENSG00000052850	ALX4	ALX homeobox 4	0	2	0	3	0	0	0	1	2	4	4	1
ENSG00000053108	FSTL4	follistatin like 4	11	12	4	16	1	4	17	9	13	8	13	14
ENSG00000053254	FOXN3	forkhead box N3	287	404	276	596	406	410	277	292	384	420	404	334
ENSG00000053328	METTL24	methyltransferase like 24	0	0	0	0	0	0	0	0	0	0	1	0
ENSG00000053371	AKR7A2	aldo-keto reductase family 7 member A2	253	271	206	339	231	256	270	197	285	283	276	210
ENSG00000053372	MRTO4	MRT4 homolog, ribosome maturation factor	134	163	164	209	120	159	172	149	199	170	147	152
ENSG00000053438	NNAT	neuronatin	1	0	3	4	0	3	4	1	4	121	86	70
ENSG00000053501	USE1	unconventional SNARE in the ER 1	118	137	107	243	189	211	144	95	165	169	163	119
ENSG00000053524	MCF2L2	MCF.2 cell line derived transforming sequence-like 2	5	7	5	9	9	8	9	7	6	5	5	5
ENSG00000053702	NRIP2	nuclear receptor interacting protein 2	2	5	3	5	2	2	6	5	5	1	1	0
ENSG00000053747	LAMA3	laminin subunit alpha 3	0	1	0	2	2	0	0	3	3	2	6	0
ENSG00000053770	AP5M1	adaptor related protein complex 5 mu 1 subunit	145	183	146	240	154	142	133	140	205	102	127	103
ENSG00000053900	ANAPC4	anaphase promoting complex subunit 4	65	71	59	101	59	70	67	43	57	52	53	53
ENSG00000053918	KCNQ1	potassium voltage-gated channel subfamily Q member 1	19	16	16	28	17	12	25	14	22	33	38	31
ENSG00000054116	TRAPPC3	trafficking protein particle complex 3	469	505	355	689	517	553	602	415	578	556	486	421
ENSG00000054118	THRAP3	thyroid hormone receptor associated protein 3	366	488	328	552	415	469	479	595	460	364	314	273
ENSG00000054148	PHPT1	phosphohistidine phosphatase 1	893	982	707	1538	1135	1111	939	686	967	840	801	621
ENSG00000054179	ENTPD2	ectonucleoside triphosphate diphosphohydrolase 2	1	1	2	1	2	2	1	0	0	0	1	0
ENSG00000054267	ARID4B	AT-rich interaction domain 4B	101	179	105	172	133	136	97	104	135	68	81	72
ENSG00000054277	OPN3	opsin 3	2	2	1	0	2	1	1	0	1	0	0	0
ENSG00000054282	SDCCAG8	serologically defined colon cancer antigen 8	76	65	66	106	87	96	44	29	69	44	42	40
ENSG00000054356	PTPRN	protein tyrosine phosphatase, receptor type N	476	522	398	593	444	409	683	545	705	576	529	472
ENSG00000054392	HHAT	hedgehog acyltransferase	74	81	69	114	86	97	73	57	83	61	67	50
ENSG00000054523	KIF1B	kinesin family member 1B	330	359	240	404	296	247	348	242	347	264	249	215
ENSG00000054598	FOXC1	forkhead box C1	922	1069	893	753	481	563	831	755	1028	910	751	675
ENSG00000054611	TBC1D22A	TBC1 domain family member 22A	97	114	80	154	105	92	96	67	101	56	62	36
ENSG00000054654	SYNE2	spectrin repeat containing nuclear envelope protein 2	59	94	66	107	66	87	69	55	90	67	43	44
ENSG00000054690	PLEKHH1	pleckstrin homology, MyTH4 and FERM domain containing H1	7	7	4	7	8	10	2	2	5	5	5	1
ENSG00000054793	ATP9A	ATPase phospholipid transporting 9A (putative)	168	233	157	235	160	139	259	193	265	156	130	114
ENSG00000054803	CBLN4	cerebellin 4 precursor	2	3	4	0	0	0	0	1	0	1	1	1
ENSG00000054938	CHRDL2	chordin like 2	1	1	0	2	0	3	0	0	0	0	1	1
ENSG00000054965	FAM168A	family with sequence similarity 168 member A	279	290	241	384	269	261	343	251	308	297	244	222
ENSG00000054967	RELT	RELT, TNF receptor	35	42	32	47	34	25	53	36	56	42	31	35
ENSG00000054983	GALC	galactosylceramidase	47	38	23	62	59	50	53	33	42	50	54	46
ENSG00000055044	NOP58	NOP58 ribonucleoprotein	379	432	310	524	355	362	423	419	529	394	325	271
ENSG00000055070	SZRD1	SUZ RNA binding domain containing 1	627	731	553	929	613	617	666	489	715	551	512	362
ENSG00000055118	KCNH2	potassium voltage-gated channel subfamily H member 2	772	869	630	1095	744	810	705	536	730	560	536	474
ENSG00000055130	CUL1	cullin 1	227	260	161	333	225	207	167	186	246	150	120	109
ENSG00000055147	FAM114A2	family with sequence similarity 114 member A2	116	118	99	137	100	99	106	96	132	102	94	71
ENSG00000055163	CYFIP2	cytoplasmic FMR1 interacting protein 2	425	493	349	562	345	312	533	444	655	450	354	325
ENSG00000055208	TAB2	TGF-beta activated kinase 1/MAP3K7 binding protein 2	246	252	190	314	190	217	246	200	257	287	240	221
ENSG00000055211	GINM1	glycoprotein integral membrane 1	102	132	73	183	140	134	113	95	131	158	152	109
ENSG00000055332	EIF2AK2	eukaryotic translation initiation factor 2 alpha kinase 2	278	304	254	480	337	412	235	217	317	283	238	215
ENSG00000055483	USP36	ubiquitin specific peptidase 36	87	101	88	178	104	115	68	64	93	98	100	73
ENSG00000055609	KMT2C	lysine methyltransferase 2C	144	197	150	274	188	194	127	132	165	155	137	137
ENSG00000055732	MCOLN3	mucolipin 3	0	0	2	0	0	0	0	0	0	0	0	0
ENSG00000055813	CCDC85A	coiled-coil domain containing 85A	0	0	0	0	0	1	0	0	0	0	0	0
ENSG00000055917	PUM2	pumilio RNA binding family member 2	268	317	229	399	284	277	226	233	240	269	216	192
ENSG00000055950	MRPL43	mitochondrial ribosomal protein L43	674	641	504	882	724	698	645	528	711	589	621	515
ENSG00000055955	ITIH4	inter-alpha-trypsin inhibitor heavy chain family member 4	17	23	7	35	8	20	11	3	9	19	7	5
ENSG00000055957	ITIH1	inter-alpha-trypsin inhibitor heavy chain 1	0	0	0	0	0	0	0	0	1	0	0	0
ENSG00000056050	HPF1	histone PARylation factor 1	310	328	247	355	260	294	237	216	278	279	253	216
ENSG00000056097	ZFR	zinc finger RNA binding protein	149	174	114	206	131	133	130	131	188	182	162	121
ENSG00000056277	ZNF280C	zinc finger protein 280C	33	33	43	54	38	40	49	52	54	76	47	48
ENSG00000056291	NPFFR2	neuropeptide FF receptor 2	61	61	44	50	39	39	35	37	35	41	48	35
ENSG00000078725	BRINP1	BMP/retinoic acid inducible neural specific 1	4	3	4	5	4	5	26	29	28	22	16	15
ENSG00000056558	TRAF1	TNF receptor associated factor 1	2	3	1	8	5	7	3	2	1	0	0	3
ENSG00000056586	RC3H2	ring finger and CCCH-type domains 2	131	184	129	215	181	178	150	131	176	101	106	82
ENSG00000056736	IL17RB	interleukin 17 receptor B	26	35	23	31	18	19	17	14	35	9	18	21
ENSG00000056972	TRAF3IP2	TRAF3 interacting protein 2	204	231	175	73	57	43	203	172	245	31	21	22
ENSG00000056998	GYG2	glycogenin 2	59	96	60	113	58	77	79	56	65	46	32	35
ENSG00000057019	DCBLD2	discoidin, CUB and LCCL domain containing 2	132	176	137	270	184	202	151	133	190	99	113	83
ENSG00000057252	SOAT1	sterol O-acyltransferase 1	156	252	162	272	231	204	203	170	220	155	113	110
ENSG00000057294	PKP2	plakophilin 2	68	64	73	129	62	71	50	47	74	45	37	49
ENSG00000057468	MSH4	mutS homolog 4	0	0	0	0	0	0	0	0	0	0	0	1
ENSG00000057593	F7	coagulation factor VII	1	5	0	5	1	3	1	1	0	0	2	1
ENSG00000057608	GDI2	GDP dissociation inhibitor 2	873	934	708	1100	780	774	950	849	1119	1193	1096	890
ENSG00000057657	PRDM1	PR/SET domain 1	0	0	1	1	0	1	1	0	0	0	0	1
ENSG00000057663	ATG5	autophagy related 5	114	118	100	158	110	105	107	105	114	110	103	103
ENSG00000057704	TMCC3	transmembrane and coiled-coil domain family 3	28	18	24	21	10	15	26	13	24	16	23	12
ENSG00000057757	PITHD1	PITH domain containing 1	141	171	128	178	135	126	168	129	181	181	179	153
ENSG00000057935	MTA3	metastasis associated 1 family member 3	296	375	288	443	294	294	312	267	342	344	317	288
ENSG00000058056	USP13	ubiquitin specific peptidase 13 (isopeptidase T-3)	59	81	58	97	89	75	62	55	81	67	50	50
ENSG00000058063	ATP11B	ATPase phospholipid transporting 11B (putative)	41	36	27	48	34	37	39	29	56	48	45	40
ENSG00000058085	LAMC2	laminin subunit gamma 2	6	6	3	6	5	3	7	4	9	13	7	5
ENSG00000058091	CDK14	cyclin dependent kinase 14	123	106	108	143	101	116	87	99	118	99	78	57
ENSG00000058262	SEC61A1	Sec61 translocon alpha 1 subunit	676	795	568	1292	811	848	758	660	872	813	727	598
ENSG00000058272	PPP1R12A	protein phosphatase 1 regulatory subunit 12A	215	265	204	347	193	206	152	180	240	230	185	193
ENSG00000058335	RASGRF1	Ras protein specific guanine nucleotide releasing factor 1	0	0	0	0	0	1	0	1	1	0	3	1
ENSG00000058404	CAMK2B	calcium/calmodulin dependent protein kinase II beta	16	27	16	18	15	16	19	19	27	8	7	5
ENSG00000058453	CROCC	ciliary rootlet coiled-coil, rootletin	112	169	88	152	115	141	83	91	95	76	93	53
ENSG00000058600	POLR3E	RNA polymerase III subunit E	115	138	82	147	104	113	99	105	138	189	153	110
ENSG00000058668	ATP2B4	ATPase plasma membrane Ca2+ transporting 4	206	242	163	601	398	422	169	150	235	178	171	140
ENSG00000058673	ZC3H11A	zinc finger CCCH-type containing 11A	365	484	370	655	437	424	373	305	445	484	399	334
ENSG00000058729	RIOK2	RIO kinase 2	74	95	52	102	67	66	63	53	69	65	73	50
ENSG00000058799	YIPF1	Yip1 domain family member 1	138	130	112	206	158	142	139	119	158	170	133	133
ENSG00000058804	NDC1	NDC1 transmembrane nucleoporin	111	107	108	144	115	100	130	101	159	151	166	132
ENSG00000058866	DGKG	diacylglycerol kinase gamma	4	6	0	4	2	1	10	4	5	12	5	7
ENSG00000059122	FLYWCH1	FLYWCH-type zinc finger 1	135	163	125	236	152	151	165	120	163	103	116	106
ENSG00000059145	UNKL	unkempt family like zinc finger	247	275	239	575	448	487	233	246	298	193	206	164
ENSG00000059377	TBXAS1	thromboxane A synthase 1	8	22	10	18	9	18	15	12	14	12	9	10
ENSG00000059378	PARP12	poly(ADP-ribose) polymerase family member 12	10	16	13	8	2	3	2	6	3	3	8	5
ENSG00000059573	ALDH18A1	aldehyde dehydrogenase 18 family member A1	198	218	180	269	185	233	216	191	222	226	198	189
ENSG00000059588	TARBP1	TAR (HIV-1) RNA binding protein 1	53	92	53	114	65	65	47	38	58	87	79	62
ENSG00000059691	GATB	glutamyl-tRNA amidotransferase subunit B	94	105	70	164	119	123	80	49	100	75	60	63
ENSG00000059728	MXD1	MAX dimerization protein 1	31	32	33	41	31	28	27	10	24	31	34	21
ENSG00000059758	CDK17	cyclin dependent kinase 17	61	90	52	106	72	75	67	62	70	79	60	48
ENSG00000059769	DNAJC25	DnaJ heat shock protein family (Hsp40) member C25	46	53	36	62	39	43	46	36	37	68	58	55
ENSG00000059804	SLC2A3	solute carrier family 2 member 3	0	0	2	3	1	6	0	2	4	10	5	6
ENSG00000059915	PSD	pleckstrin and Sec7 domain containing	86	122	78	150	90	101	129	84	133	114	90	88
ENSG00000060069	CTDP1	CTD phosphatase subunit 1	57	66	54	104	56	70	59	52	84	57	60	56
ENSG00000060138	YBX3	Y-box binding protein 3	0	0	1	0	0	2	0	0	1	0	0	0
ENSG00000060237	WNK1	WNK lysine deficient protein kinase 1	364	505	342	652	476	461	348	285	429	424	357	338
ENSG00000060303	RPS17P5	ribosomal protein S17 pseudogene 5	4	4	1	1	2	3	2	1	0	4	3	5
ENSG00000060339	CCAR1	cell division cycle and apoptosis regulator 1	217	327	219	338	222	267	165	250	314	107	90	100
ENSG00000060491	OGFR	opioid growth factor receptor	151	179	120	229	143	141	168	116	177	151	148	94
ENSG00000060558	GNA15	G protein subunit alpha 15	0	0	0	0	0	0	1	0	0	1	0	1
ENSG00000060566	CREB3L3	cAMP responsive element binding protein 3 like 3	4	8	2	6	1	6	3	2	1	11	6	6
ENSG00000060642	PIGV	phosphatidylinositol glycan anchor biosynthesis class V	95	124	81	166	135	120	97	76	123	149	165	101
ENSG00000172554	SNTG2	syntrophin gamma 2	1	2	3	0	0	1	19	7	13	17	9	16
ENSG00000137727	ARHGAP20	Rho GTPase activating protein 20	5	6	5	3	3	2	33	33	34	29	27	19
ENSG00000060709	RIMBP2	RIMS binding protein 2	119	138	101	82	40	55	123	85	121	107	100	62
ENSG00000060718	COL11A1	collagen type XI alpha 1 chain	19	29	18	5	1	1	2	0	4	93	58	71
ENSG00000060749	QSER1	glutamine and serine rich 1	91	124	83	178	106	122	129	83	137	128	118	95
ENSG00000060762	MPC1	mitochondrial pyruvate carrier 1	242	239	208	242	193	223	290	229	326	188	230	157
ENSG00000060971	ACAA1	acetyl-CoA acyltransferase 1	5	3	1	1	1	0	2	2	0	6	2	1
ENSG00000060982	BCAT1	branched chain amino acid transaminase 1	352	396	327	676	447	436	303	265	389	108	83	76
ENSG00000061273	HDAC7	histone deacetylase 7	68	105	69	148	104	96	66	65	81	61	41	42
ENSG00000061337	LZTS1	leucine zipper tumor suppressor 1	84	112	98	85	79	50	121	78	134	43	46	30
ENSG00000061455	PRDM6	PR/SET domain 6	5	1	2	12	3	1	6	5	8	3	7	1
ENSG00000061492	WNT8A	Wnt family member 8A	0	1	0	0	0	0	0	0	0	0	0	0
ENSG00000061656	SPAG4	sperm associated antigen 4	74	56	43	118	95	102	75	48	67	105	111	98
ENSG00000061676	NCKAP1	NCK associated protein 1	409	412	339	493	357	339	344	291	409	403	345	291
ENSG00000061794	MRPS35	mitochondrial ribosomal protein S35	187	200	142	249	202	198	166	169	176	182	180	136
ENSG00000061918	GUCY1B3	guanylate cyclase 1 soluble subunit beta	74	70	48	97	60	79	83	86	89	120	94	83
ENSG00000061936	SFSWAP	splicing factor SWAP homolog	181	213	153	234	154	173	147	118	173	167	142	130
ENSG00000061938	TNK2	tyrosine kinase non receptor 2	183	206	153	291	197	210	171	139	205	210	175	145
ENSG00000061987	MON2	MON2 homolog, regulator of endosome-to-Golgi trafficking	72	92	57	120	95	100	65	65	81	100	105	70
ENSG00000062038	CDH3	cadherin 3	3	9	4	9	0	4	5	6	7	18	21	20
ENSG00000062096	ARSF	arylsulfatase F	1	3	1	0	2	0	1	0	1	0	2	0
ENSG00000062194	GPBP1	GC-rich promoter binding protein 1	252	305	212	306	219	230	264	213	297	354	324	285
ENSG00000062282	DGAT2	diacylglycerol O-acyltransferase 2	14	22	9	26	18	21	28	25	18	24	33	27
ENSG00000062370	ZNF112	zinc finger protein 112	25	45	33	46	35	32	17	20	23	4	15	7
ENSG00000062485	CS	citrate synthase	513	568	430	858	586	544	576	493	606	704	620	500
ENSG00000062524	LTK	leukocyte receptor tyrosine kinase	35	47	34	31	20	19	51	32	59	19	24	17
ENSG00000062582	MRPS24	mitochondrial ribosomal protein S24	601	671	509	878	666	722	676	574	802	889	830	725
ENSG00000062598	ELMO2	engulfment and cell motility 2	152	158	131	221	152	144	139	105	150	150	137	97
ENSG00000062650	WAPL	WAPL cohesin release factor	131	165	101	204	130	168	142	114	131	115	119	108
ENSG00000062716	VMP1	vacuole membrane protein 1	690	703	503	814	543	597	684	566	720	685	653	520
ENSG00000062725	APPBP2	amyloid beta precursor protein binding protein 2	277	332	271	464	359	339	264	230	351	265	222	229
ENSG00000062822	POLD1	DNA polymerase delta 1, catalytic subunit	136	174	124	203	119	151	135	108	157	189	170	138
ENSG00000063015	SEZ6	seizure related 6 homolog	58	79	60	96	67	71	122	90	140	92	71	56
ENSG00000063046	EIF4B	eukaryotic translation initiation factor 4B	721	784	623	1199	855	898	735	632	809	1191	1059	923
ENSG00000063127	SLC6A16	solute carrier family 6 member 16	8	15	9	16	8	5	7	1	3	9	9	6
ENSG00000063169	BICRA	BRD4 interacting chromatin remodelling complex associated protein	78	102	72	105	74	81	55	42	88	72	38	37
ENSG00000063176	SPHK2	sphingosine kinase 2	206	249	175	352	266	273	205	132	161	146	126	100
ENSG00000063177	RPL18	ribosomal protein L18	8809	9324	6969	11893	8769	9307	9554	6951	9856	12699	12020	9634
ENSG00000063180	CA11	carbonic anhydrase 11	53	72	51	126	93	108	44	29	67	86	73	61
ENSG00000063241	ISOC2	isochorismatase domain containing 2	195	182	152	203	164	175	214	193	230	136	135	124
ENSG00000063244	U2AF2	U2 small nuclear RNA auxiliary factor 2	219	237	178	281	188	210	206	162	262	133	119	117
ENSG00000063245	EPN1	epsin 1	767	810	655	1107	738	803	802	553	785	686	592	545
ENSG00000063322	MED29	mediator complex subunit 29	223	258	170	332	227	220	242	153	253	192	193	170
ENSG00000063438	AHRR	aryl-hydrocarbon receptor repressor	13	6	1	8	8	6	6	7	6	9	11	5
ENSG00000063587	ZNF275	zinc finger protein 275	51	57	45	85	65	68	48	61	69	47	48	40
ENSG00000063601	MTMR1	myotubularin related protein 1	40	57	37	62	38	63	49	32	53	32	18	23
ENSG00000063660	GPC1	glypican 1	198	239	171	387	248	265	185	144	190	156	167	129
ENSG00000063761	ADCK1	aarF domain containing kinase 1	42	33	33	45	42	31	24	24	42	42	30	37
ENSG00000063854	HAGH	hydroxyacylglutathione hydrolase	400	396	310	464	304	341	349	254	387	300	290	225
ENSG00000063978	RNF4	ring finger protein 4	180	233	183	342	229	253	202	161	206	139	154	126
ENSG00000064012	CASP8	caspase 8	4	4	6	20	15	17	3	9	4	1	2	1
ENSG00000064042	LIMCH1	LIM and calponin homology domains 1	560	693	502	814	526	603	592	699	983	600	500	448
ENSG00000064102	INTS13	integrator complex subunit 13	90	117	86	124	85	92	91	89	94	101	112	89
ENSG00000064115	TM7SF3	transmembrane 7 superfamily member 3	532	550	453	702	462	494	660	532	761	527	495	417
ENSG00000064195	DLX3	distal-less homeobox 3	0	2	1	3	2	2	3	1	4	1	0	0
ENSG00000064199	SPA17	sperm autoantigenic protein 17	70	73	59	70	49	59	79	53	81	99	91	77
ENSG00000064201	TSPAN32	tetraspanin 32	0	0	1	5	1	5	1	0	0	0	0	0
ENSG00000064205	WISP2	WNT1 inducible signaling pathway protein 2	2	0	2	4	0	1	0	1	3	2	0	0
ENSG00000064225	ST3GAL6	ST3 beta-galactoside alpha-2,3-sialyltransferase 6	81	88	83	54	53	46	127	89	158	48	44	30
ENSG00000064270	ATP2C2	ATPase secretory pathway Ca2+ transporting 2	6	11	3	6	7	2	9	3	6	6	5	3
ENSG00000064300	NGFR	nerve growth factor receptor	236	251	166	470	331	327	169	148	215	330	307	259
ENSG00000064309	CDON	cell adhesion associated, oncogene regulated	218	235	178	361	245	243	178	157	209	235	189	159
ENSG00000064313	TAF2	TATA-box binding protein associated factor 2	69	89	60	99	71	70	59	59	80	75	65	57
ENSG00000064393	HIPK2	homeodomain interacting protein kinase 2	314	435	318	657	479	463	324	323	487	236	166	178
ENSG00000064419	TNPO3	transportin 3	394	509	385	681	477	496	378	372	526	554	414	423
ENSG00000064490	RFXANK	regulatory factor X associated ankyrin containing protein	340	366	267	448	328	333	369	265	418	289	261	247
ENSG00000064545	TMEM161A	transmembrane protein 161A	197	197	147	293	184	207	191	166	198	209	217	205
ENSG00000064547	LPAR2	lysophosphatidic acid receptor 2	119	150	109	94	62	68	64	49	88	58	60	51
ENSG00000064601	CTSA	cathepsin A	678	717	582	2139	1591	1715	877	604	879	492	469	379
ENSG00000064607	SUGP2	SURP and G-patch domain containing 2	318	406	299	514	315	317	324	279	386	481	397	322
ENSG00000064651	SLC12A2	solute carrier family 12 member 2	64	82	67	108	56	50	74	77	85	74	86	78
ENSG00000064652	SNX24	sorting nexin 24	108	186	126	178	135	166	122	108	141	226	203	153
ENSG00000064655	EYA2	EYA transcriptional coactivator and phosphatase 2	0	0	0	0	0	0	0	1	1	0	0	5
ENSG00000064666	CNN2	calponin 2	11	10	8	6	9	11	13	8	10	8	13	9
ENSG00000064687	ABCA7	ATP binding cassette subfamily A member 7	42	55	41	123	73	87	60	38	56	46	39	47
ENSG00000064692	SNCAIP	synuclein alpha interacting protein	79	74	55	120	80	67	59	48	56	81	101	75
ENSG00000064703	DDX20	DEAD-box helicase 20	85	89	78	95	69	61	78	64	86	76	66	58
ENSG00000064726	BTBD1	BTB domain containing 1	198	190	165	256	163	211	184	145	202	165	146	116
ENSG00000064763	FAR2	fatty acyl-CoA reductase 2	43	50	35	49	42	38	43	28	52	9	8	4
ENSG00000064787	BCAS1	breast carcinoma amplified sequence 1	2	1	1	1	0	0	2	5	2	4	4	4
ENSG00000064932	SBNO2	strawberry notch homolog 2	112	139	104	185	130	117	112	75	109	119	119	98
ENSG00000064933	PMS1	PMS1 homolog 1, mismatch repair system component	106	81	79	103	80	82	74	72	85	94	88	67
ENSG00000064961	HMG20B	high mobility group 20B	507	526	419	721	569	529	435	394	573	747	761	590
ENSG00000064989	CALCRL	calcitonin receptor like receptor	11	7	10	25	21	16	3	14	10	4	5	3
ENSG00000064995	TAF11	TATA-box binding protein associated factor 11	259	301	225	388	279	299	245	261	308	226	210	182
ENSG00000064999	ANKS1A	ankyrin repeat and sterile alpha motif domain containing 1A	109	113	83	182	134	120	106	91	115	125	129	101
ENSG00000065000	AP3D1	adaptor related protein complex 3 delta 1 subunit	536	640	490	1048	646	634	526	483	607	510	454	430
ENSG00000065029	ZNF76	zinc finger protein 76	51	73	64	96	80	76	79	48	62	39	29	39
ENSG00000065054	SLC9A3R2	SLC9A3 regulator 2	151	161	113	264	154	190	183	139	204	178	141	114
ENSG00000065057	NTHL1	nth like DNA glycosylase 1	197	204	142	279	186	198	206	157	214	181	180	158
ENSG00000065060	UHRF1BP1	UHRF1 binding protein 1	51	69	49	93	65	65	55	47	72	62	51	41
ENSG00000065135	GNAI3	G protein subunit alpha i3	804	859	645	925	689	703	689	593	774	655	558	477
ENSG00000065150	IPO5	importin 5	511	596	456	784	558	511	597	497	625	894	773	660
ENSG00000065154	OAT	ornithine aminotransferase	432	433	364	571	399	370	379	372	465	330	310	235
ENSG00000065183	WDR3	WD repeat domain 3	109	125	96	200	111	126	123	102	123	160	128	116
ENSG00000065243	PKN2	protein kinase N2	46	66	48	78	64	73	63	50	80	62	58	50
ENSG00000065268	WDR18	WD repeat domain 18	289	277	212	382	260	311	315	204	329	206	196	172
ENSG00000065308	TRAM2	translocation associated membrane protein 2	55	70	48	110	92	77	38	67	89	53	45	40
ENSG00000065320	NTN1	netrin 1	1	0	0	1	0	0	0	0	1	1	0	1
ENSG00000065325	GLP2R	glucagon like peptide 2 receptor	1	0	0	0	0	0	0	0	0	0	0	0
ENSG00000065328	MCM10	minichromosome maintenance 10 replication initiation factor	92	109	81	135	73	76	102	89	111	69	76	73
ENSG00000065357	DGKA	diacylglycerol kinase alpha	113	126	93	179	123	117	121	106	122	65	58	56
ENSG00000065361	ERBB3	erb-b2 receptor tyrosine kinase 3	16	23	18	28	15	16	19	14	29	30	32	23
ENSG00000065371	ROPN1	rhophilin associated tail protein 1	0	1	0	1	0	2	1	2	0	0	0	1
ENSG00000065413	ANKRD44	ankyrin repeat domain 44	16	22	15	30	17	20	20	19	27	29	11	18
ENSG00000065427	KARS	lysyl-tRNA synthetase	686	784	606	944	636	657	753	622	814	988	903	732
ENSG00000065457	ADAT1	adenosine deaminase, tRNA specific 1	219	278	202	382	279	261	217	178	232	176	156	147
ENSG00000065485	PDIA5	protein disulfide isomerase family A member 5	63	70	51	120	83	70	72	62	104	95	87	95
ENSG00000065491	TBC1D22B	TBC1 domain family member 22B	75	75	67	128	83	91	66	63	65	61	68	50
ENSG00000065518	NDUFB4	NADH:ubiquinone oxidoreductase subunit B4	1484	1511	1180	2025	1552	1697	1727	1390	1925	1459	1457	1162
ENSG00000065526	SPEN	spen family transcriptional repressor	124	150	118	214	128	149	101	110	133	147	123	120
ENSG00000065534	MYLK	myosin light chain kinase	61	63	67	126	76	85	69	81	89	61	61	56
ENSG00000065548	ZC3H15	zinc finger CCCH-type containing 15	342	363	314	460	313	266	294	311	428	377	288	243
ENSG00000065559	MAP2K4	mitogen-activated protein kinase kinase 4	96	122	102	153	95	96	108	62	133	88	88	71
ENSG00000139767	SRRM4	serine/arginine repetitive matrix 4	12	14	11	13	8	5	78	51	96	64	61	55
ENSG00000065609	SNAP91	synaptosome associated protein 91	231	294	165	213	144	146	252	219	244	207	204	190
ENSG00000065613	SLK	STE20 like kinase	108	135	84	136	108	127	98	88	115	109	111	78
ENSG00000065615	CYB5R4	cytochrome b5 reductase 4	104	156	87	124	122	97	137	107	181	139	128	102
ENSG00000065618	COL17A1	collagen type XVII alpha 1 chain	13	22	19	7	6	3	6	2	6	13	6	0
ENSG00000065621	GSTO2	glutathione S-transferase omega 2	6	5	7	15	9	12	8	9	3	13	19	11
ENSG00000065665	SEC61A2	Sec61 translocon alpha 2 subunit	73	101	55	112	80	88	99	90	123	127	95	97
ENSG00000065675	PRKCQ	protein kinase C theta	11	9	8	17	14	5	11	7	7	6	3	3
ENSG00000065717	TLE2	transducin like enhancer of split 2	112	123	73	184	118	123	103	76	103	109	104	88
ENSG00000065802	ASB1	ankyrin repeat and SOCS box containing 1	163	198	141	330	191	180	184	142	169	103	89	101
ENSG00000065809	FAM107B	family with sequence similarity 107 member B	263	313	250	456	289	321	245	252	276	206	156	159
ENSG00000065833	ME1	malic enzyme 1	253	272	199	261	183	191	195	190	213	186	165	147
ENSG00000065882	TBC1D1	TBC1 domain family member 1	213	216	189	300	196	220	157	171	200	313	238	217
ENSG00000065883	CDK13	cyclin dependent kinase 13	161	209	130	251	145	172	133	108	165	155	136	106
ENSG00000150456	EEF1AKMT1	EEF1A lysine methyltransferase 1	8	6	6	27	17	29	37	31	45	36	43	26
ENSG00000065923	SLC9A7	solute carrier family 9 member A7	47	57	52	91	71	85	54	55	58	66	56	46
ENSG00000065970	FOXJ2	forkhead box J2	36	53	27	69	47	57	46	33	47	47	46	37
ENSG00000065978	YBX1	Y-box binding protein 1	2703	3088	2317	2723	2078	2186	2795	2601	3318	3133	2745	2192
ENSG00000065989	PDE4A	phosphodiesterase 4A	50	68	62	183	92	124	56	51	76	80	61	56
ENSG00000066027	PPP2R5A	protein phosphatase 2 regulatory subunit B'alpha	66	66	55	97	78	57	45	48	68	71	73	42
ENSG00000066032	CTNNA2	catenin alpha 2	224	303	187	371	272	312	273	204	317	185	159	137
ENSG00000066044	ELAVL1	ELAV like RNA binding protein 1	287	350	243	440	281	313	344	228	351	349	351	254
ENSG00000066056	TIE1	tyrosine kinase with immunoglobulin like and EGF like domains 1	0	0	0	0	1	1	0	1	0	1	0	1
ENSG00000066084	DIP2B	disco interacting protein 2 homolog B	106	113	91	240	146	135	119	112	128	92	88	65
ENSG00000066117	SMARCD1	SWI/SNF related, matrix associated, actin dependent regulator of chromatin, subfamily d, member 1	377	511	383	479	328	289	380	283	417	396	331	311
ENSG00000066135	KDM4A	lysine demethylase 4A	201	232	159	277	195	214	188	171	224	149	118	107
ENSG00000066136	NFYC	nuclear transcription factor Y subunit gamma	161	164	145	181	104	152	153	123	170	123	113	87
ENSG00000066185	ZMYND12	zinc finger MYND-type containing 12	4	2	4	8	7	6	1	4	11	8	9	8
ENSG00000066230	SLC9A3	solute carrier family 9 member A3	0	0	1	0	0	0	0	0	0	0	0	0
ENSG00000066248	NGEF	neuronal guanine nucleotide exchange factor	5	6	10	2	4	1	4	1	3	9	12	13
ENSG00000066279	ASPM	abnormal spindle microtubule assembly	136	151	110	123	88	102	105	75	111	217	229	196
ENSG00000066294	CD84	CD84 molecule	0	0	2	1	0	1	0	0	1	0	0	0
ENSG00000066322	ELOVL1	ELOVL fatty acid elongase 1	286	289	220	391	258	290	248	175	231	151	128	112
ENSG00000066336	SPI1	Spi-1 proto-oncogene	2	1	1	4	0	1	0	0	0	0	2	3
ENSG00000066379	ZNRD1	zinc ribbon domain containing 1	165	197	155	197	149	122	181	128	207	197	208	148
ENSG00000152093	CFC1B	cripto, FRL-1, cryptic family 1B	3	2	2	3	2	3	16	15	8	5	10	9
ENSG00000066405	CLDN18	claudin 18	1	1	1	0	0	0	1	1	1	2	0	0
ENSG00000066422	ZBTB11	zinc finger and BTB domain containing 11	60	66	37	111	71	74	78	44	71	84	80	70
ENSG00000066427	ATXN3	ataxin 3	93	122	87	155	123	102	90	80	125	105	114	92
ENSG00000066455	GOLGA5	golgin A5	86	98	84	144	94	110	66	92	97	191	158	134
ENSG00000066468	FGFR2	fibroblast growth factor receptor 2	31	34	15	26	28	26	28	21	32	30	32	30
ENSG00000066557	LRRC40	leucine rich repeat containing 40	59	76	65	89	57	75	75	67	94	70	68	38
ENSG00000066583	ISOC1	isochorismatase domain containing 1	452	501	392	546	374	352	472	459	594	446	438	355
ENSG00000066629	EML1	echinoderm microtubule associated protein like 1	52	62	42	61	41	47	52	30	52	38	33	30
ENSG00000066651	TRMT11	tRNA methyltransferase 11 homolog	92	81	59	84	54	48	73	53	65	88	92	83
ENSG00000066654	THUMPD1	THUMP domain containing 1	116	141	107	192	106	144	106	123	144	147	121	99
ENSG00000066697	MSANTD3	Myb/SANT DNA binding domain containing 3	227	254	205	346	237	243	236	203	257	201	170	130
ENSG00000066735	KIF26A	kinesin family member 26A	1041	1456	956	1156	762	816	911	663	1062	746	711	575
ENSG00000066739	ATG2B	autophagy related 2B	50	55	63	89	66	62	49	58	63	54	41	50
ENSG00000066777	ARFGEF1	ADP ribosylation factor guanine nucleotide exchange factor 1	62	81	57	105	69	63	58	51	67	67	59	70
ENSG00000066813	ACSM2B	acyl-CoA synthetase medium-chain family member 2B	1	0	0	0	0	0	0	0	0	0	0	0
ENSG00000066827	ZFAT	zinc finger and AT-hook domain containing	21	28	19	23	20	11	28	14	15	24	22	9
ENSG00000066855	MTFR1	mitochondrial fission regulator 1	88	88	99	89	62	67	83	78	88	106	115	81
ENSG00000066923	STAG3	stromal antigen 3	44	34	22	53	27	39	34	26	33	49	47	50
ENSG00000066926	FECH	ferrochelatase	170	209	151	230	161	199	133	121	155	151	150	126
ENSG00000066933	MYO9A	myosin IXA	40	68	37	91	74	75	43	23	57	55	43	50
ENSG00000067048	DDX3Y	DEAD-box helicase 3, Y-linked	0	0	0	0	0	0	0	1	0	0	0	0
ENSG00000067057	PFKP	phosphofructokinase, platelet	570	638	476	713	474	473	811	590	818	471	430	400
ENSG00000261115	TMEM178B	transmembrane protein 178B	6	14	9	7	5	6	62	35	61	36	52	28
ENSG00000067066	SP100	SP100 nuclear antigen	34	43	25	44	36	38	37	37	48	19	24	21
ENSG00000067082	KLF6	Kruppel like factor 6	223	248	215	221	126	142	139	155	198	150	150	110
ENSG00000067113	PLPP1	phospholipid phosphatase 1	273	289	196	448	341	307	253	243	296	287	260	223
ENSG00000067141	NEO1	neogenin 1	230	277	225	441	273	309	327	207	331	397	324	269
ENSG00000067167	TRAM1	translocation associated membrane protein 1	209	268	205	346	233	249	177	211	232	255	201	189
ENSG00000067177	PHKA1	phosphorylase kinase regulatory subunit alpha 1	66	87	50	111	72	79	82	45	65	99	98	67
ENSG00000067182	TNFRSF1A	TNF receptor superfamily member 1A	161	170	144	381	285	283	119	85	117	68	84	61
ENSG00000067191	CACNB1	calcium voltage-gated channel auxiliary subunit beta 1	63	94	59	78	38	55	63	53	86	37	33	30
ENSG00000067208	EVI5	ecotropic viral integration site 5	82	113	81	169	116	118	101	107	111	92	81	79
ENSG00000067221	STOML1	stomatin like 1	88	94	78	135	75	75	89	75	95	90	82	61
ENSG00000067225	PKM	pyruvate kinase, muscle	2651	2812	2163	3299	2277	2279	3741	2605	3702	1904	1973	1509
ENSG00000067248	DHX29	DExH-box helicase 29	71	91	67	123	72	72	62	68	77	72	53	48
ENSG00000067334	DNTTIP2	deoxynucleotidyltransferase terminal interacting protein 2	210	282	195	325	208	213	221	180	231	215	204	165
ENSG00000067365	METTL22	methyltransferase like 22	103	114	97	131	95	79	121	74	88	142	134	109
ENSG00000067369	TP53BP1	tumor protein p53 binding protein 1	135	185	143	211	146	147	149	155	168	190	128	137
ENSG00000067445	TRO	trophinin	296	337	219	419	300	290	294	218	334	260	234	201
ENSG00000067533	RRP15	ribosomal RNA processing 15 homolog	70	93	74	113	72	73	74	84	96	51	55	48
ENSG00000067560	RHOA	ras homolog family member A	2525	2766	2086	3102	2139	2171	2350	1914	2517	2182	2104	1664
ENSG00000067596	DHX8	DEAH-box helicase 8	184	210	155	260	186	206	174	119	187	166	163	134
ENSG00000067601	PMS2P4	PMS1 homolog 2, mismatch repair system component pseudogene 4	3	5	2	4	2	3	3	3	4	1	0	5
ENSG00000067606	PRKCZ	protein kinase C zeta	22	23	17	21	14	16	21	14	16	21	15	8
ENSG00000067646	ZFY	zinc finger protein, Y-linked	0	0	1	0	0	0	0	0	0	0	0	0
ENSG00000067704	IARS2	isoleucyl-tRNA synthetase 2, mitochondrial	298	362	256	487	348	379	280	253	333	393	320	277
ENSG00000067715	SYT1	synaptotagmin 1	284	395	290	625	378	423	295	264	377	258	230	200
ENSG00000067798	NAV3	neuron navigator 3	0	2	2	1	2	2	1	2	3	0	1	0
ENSG00000067829	IDH3G	isocitrate dehydrogenase 3 (NAD(+)) gamma	215	244	169	257	216	233	238	153	242	182	174	154
ENSG00000067836	ROGDI	rogdi homolog	362	353	322	435	368	340	380	285	361	332	345	276
ENSG00000067840	PDZD4	PDZ domain containing 4	308	390	299	396	301	313	380	259	409	352	299	257
ENSG00000067842	ATP2B3	ATPase plasma membrane Ca2+ transporting 3	49	43	49	137	70	76	39	40	46	22	13	23
ENSG00000067900	ROCK1	Rho associated coiled-coil containing protein kinase 1	122	147	89	188	103	135	84	98	149	117	77	77
ENSG00000067955	CBFB	core-binding factor beta subunit	340	420	305	373	309	308	314	305	338	400	288	274
ENSG00000067992	PDK3	pyruvate dehydrogenase kinase 3	19	26	22	27	18	23	28	22	39	33	24	30
ENSG00000068001	HYAL2	hyaluronoglucosaminidase 2	389	369	271	650	495	511	365	307	415	339	354	318
ENSG00000068024	HDAC4	histone deacetylase 4	77	61	49	76	49	57	62	41	52	82	55	53
ENSG00000068028	RASSF1	Ras association domain family member 1	76	84	56	96	60	68	70	52	63	80	73	69
ENSG00000068078	FGFR3	fibroblast growth factor receptor 3	15	19	11	20	15	18	17	7	12	20	19	17
ENSG00000068079	IFI35	interferon induced protein 35	12	18	10	8	6	3	14	13	16	1	0	0
ENSG00000068097	HEATR6	HEAT repeat containing 6	81	79	71	95	78	76	61	43	77	85	75	54
ENSG00000068120	COASY	Coenzyme A synthase	365	385	323	387	289	286	264	220	304	288	241	209
ENSG00000068137	PLEKHH3	pleckstrin homology, MyTH4 and FERM domain containing H3	184	212	151	316	189	201	171	136	223	212	176	123
ENSG00000068305	MEF2A	myocyte enhancer factor 2A	88	129	90	140	98	107	107	90	107	102	87	79
ENSG00000068308	OTUD5	OTU deubiquitinase 5	428	482	375	769	518	573	425	369	439	470	473	418
ENSG00000068323	TFE3	transcription factor binding to IGHM enhancer 3	209	244	199	331	254	206	241	180	230	260	239	237
ENSG00000068354	TBC1D25	TBC1 domain family member 25	62	85	63	95	55	57	67	42	69	64	62	45
ENSG00000068366	ACSL4	acyl-CoA synthetase long-chain family member 4	234	230	242	202	147	132	145	152	191	131	116	103
ENSG00000068383	INPP5A	inositol polyphosphate-5-phosphatase A	77	83	81	125	96	111	82	72	90	84	83	60
ENSG00000068394	GPKOW	G-patch domain and KOW motifs	164	156	112	178	166	136	110	104	140	146	121	129
ENSG00000068400	GRIPAP1	GRIP1 associated protein 1	141	165	117	257	181	188	168	115	158	161	147	103
ENSG00000068438	FTSJ1	FtsJ RNA methyltransferase homolog 1 (E. coli)	201	198	170	211	170	167	224	156	251	128	134	108
ENSG00000068489	PRR11	proline rich 11	238	308	226	200	147	166	155	189	285	319	243	270
ENSG00000068615	REEP1	receptor accessory protein 1	76	104	87	78	49	54	67	85	82	45	30	34
ENSG00000068650	ATP11A	ATPase phospholipid transporting 11A	84	108	88	199	129	147	118	104	148	117	106	72
ENSG00000068654	POLR1A	RNA polymerase I subunit A	104	124	102	134	112	110	131	95	136	98	78	58
ENSG00000068697	LAPTM4A	lysosomal protein transmembrane 4 alpha	3746	3912	3094	6811	4929	5182	3610	3475	4526	2703	2532	2306
ENSG00000068724	TTC7A	tetratricopeptide repeat domain 7A	44	80	56	110	73	72	44	39	67	47	48	47
ENSG00000068745	IP6K2	inositol hexakisphosphate kinase 2	552	664	483	697	474	530	553	440	604	434	382	348
ENSG00000068781	STON1-GTF2A1L	STON1-GTF2A1L readthrough	3	0	4	6	5	3	6	5	6	6	3	2
ENSG00000068784	SRBD1	S1 RNA binding domain 1	89	89	66	104	78	96	79	86	83	103	77	76
ENSG00000068796	KIF2A	kinesin family member 2A	143	152	123	157	86	103	135	131	164	178	144	110
ENSG00000068831	RASGRP2	RAS guanyl releasing protein 2	56	63	35	55	41	36	36	31	55	44	38	32
ENSG00000068878	PSME4	proteasome activator subunit 4	110	164	120	158	129	137	112	85	137	161	147	112
ENSG00000068885	IFT80	intraflagellar transport 80	175	210	153	236	183	191	207	127	185	188	147	105
ENSG00000068903	SIRT2	sirtuin 2	238	275	196	368	253	236	258	168	248	178	169	125
ENSG00000068912	ERLEC1	endoplasmic reticulum lectin 1	258	292	210	465	318	315	253	245	276	377	388	254
ENSG00000068971	PPP2R5B	protein phosphatase 2 regulatory subunit B'beta	92	107	101	156	124	136	98	64	109	96	104	87
ENSG00000068976	PYGM	glycogen phosphorylase, muscle associated	2	6	4	19	9	11	3	1	3	3	3	0
ENSG00000068985	PAGE1	PAGE family member 1	1	0	0	3	1	1	1	1	0	0	5	1
ENSG00000069011	PITX1	paired like homeodomain 1	34	44	35	80	70	65	46	40	57	11	8	9
ENSG00000069020	MAST4	microtubule associated serine/threonine kinase family member 4	75	86	71	146	87	113	66	67	93	49	32	45
ENSG00000069188	SDK2	sidekick cell adhesion molecule 2	5	9	8	17	26	20	22	18	32	3	10	8
ENSG00000069248	NUP133	nucleoporin 133	134	169	149	199	144	123	146	107	141	173	134	115
ENSG00000069275	NUCKS1	nuclear casein kinase and cyclin dependent kinase substrate 1	1695	1915	1550	2121	1443	1537	1895	1655	1902	1584	1475	1272
ENSG00000069329	VPS35	VPS35, retromer complex component	798	1039	744	1197	855	945	715	626	827	631	479	460
ENSG00000069345	DNAJA2	DnaJ heat shock protein family (Hsp40) member A2	232	299	240	374	252	254	275	290	327	278	277	227
ENSG00000069399	BCL3	B-cell CLL/lymphoma 3	75	100	71	180	124	126	71	52	76	93	80	80
ENSG00000069424	KCNAB2	potassium voltage-gated channel subfamily A regulatory beta subunit 2	56	69	40	79	67	52	66	46	69	57	50	46
ENSG00000069431	ABCC9	ATP binding cassette subfamily C member 9	4	5	4	3	2	4	3	3	6	1	1	1
ENSG00000069482	GAL	galanin and GMAP prepropeptide	109	134	115	145	79	103	604	523	606	248	220	187
ENSG00000069493	CLEC2D	C-type lectin domain family 2 member D	129	138	106	207	154	141	130	119	152	247	208	187
ENSG00000069509	FUNDC1	FUN14 domain containing 1	192	200	168	265	188	205	216	155	242	149	156	123
ENSG00000069535	MAOB	monoamine oxidase B	3	2	0	0	1	0	92	73	90	32	24	18
ENSG00000069667	RORA	RAR related orphan receptor A	36	26	29	42	32	22	42	39	41	37	39	38
ENSG00000069696	DRD4	dopamine receptor D4	18	28	25	34	23	15	19	12	12	29	25	27
ENSG00000069702	TGFBR3	transforming growth factor beta receptor 3	0	3	2	0	1	2	0	0	0	2	3	0
ENSG00000069764	PLA2G10	phospholipase A2 group X	0	0	1	0	1	0	1	1	0	0	1	1
ENSG00000069812	HES2	hes family bHLH transcription factor 2	5	9	8	5	3	2	6	2	12	10	12	3
ENSG00000069849	ATP1B3	ATPase Na+/K+ transporting subunit beta 3	607	608	470	722	541	608	563	500	682	608	564	497
ENSG00000069869	NEDD4	neural precursor cell expressed, developmentally down-regulated 4, E3 ubiquitin protein ligase	47	56	37	56	32	39	54	45	42	49	33	37
ENSG00000069943	PIGB	phosphatidylinositol glycan anchor biosynthesis class B	95	115	87	168	133	124	89	57	106	95	64	57
ENSG00000069956	MAPK6	mitogen-activated protein kinase 6	169	164	130	160	118	98	163	139	180	156	111	104
ENSG00000069966	GNB5	G protein subunit beta 5	127	155	120	188	157	128	121	99	156	157	116	107
ENSG00000069974	RAB27A	RAB27A, member RAS oncogene family	99	133	80	155	155	124	81	84	121	76	51	53
ENSG00000069998	HDHD5	haloacid dehalogenase like hydrolase domain containing 5	217	217	169	243	181	179	248	168	239	245	213	190
ENSG00000070010	UFD1	ubiquitin recognition factor in ER associated degradation 1	379	405	287	438	323	353	413	312	424	314	293	247
ENSG00000070018	LRP6	LDL receptor related protein 6	297	327	248	407	279	251	293	257	355	396	334	287
ENSG00000070019	GUCY2C	guanylate cyclase 2C	0	1	0	0	0	0	0	0	0	0	0	0
ENSG00000070031	SCT	secretin	0	1	0	1	0	1	1	0	1	0	0	1
ENSG00000070047	PHRF1	PHD and ring finger domains 1	152	149	92	196	119	127	141	97	121	85	94	80
ENSG00000070061	IKBKAP	inhibitor of kappa light polypeptide gene enhancer in B-cells, kinase complex-associated protein	133	162	127	223	139	136	142	119	126	124	118	97
ENSG00000070081	NUCB2	nucleobindin 2	347	333	273	756	524	530	309	357	452	291	265	230
ENSG00000070087	PFN2	profilin 2	1386	1449	1133	1747	1280	1335	1607	1338	1680	1181	1172	918
ENSG00000070159	PTPN3	protein tyrosine phosphatase, non-receptor type 3	25	45	38	99	60	79	32	39	37	27	33	18
ENSG00000070182	SPTB	spectrin beta, erythrocytic	4	14	6	11	6	10	9	5	5	11	6	2
ENSG00000070190	DAPP1	dual adaptor of phosphotyrosine and 3-phosphoinositides 1	0	0	0	7	3	2	1	0	0	0	1	0
ENSG00000070193	FGF10	fibroblast growth factor 10	3	8	4	6	2	3	2	1	2	2	2	1
ENSG00000070214	SLC44A1	solute carrier family 44 member 1	372	444	325	782	494	522	399	356	500	415	360	336
ENSG00000070269	TMEM260	transmembrane protein 260	41	60	39	60	41	53	32	35	50	29	29	28
ENSG00000070366	SMG6	SMG6, nonsense mediated mRNA decay factor	334	388	290	442	264	259	478	368	491	295	340	253
ENSG00000070367	EXOC5	exocyst complex component 5	258	297	219	379	252	245	288	223	288	220	240	155
ENSG00000070371	CLTCL1	clathrin heavy chain like 1	14	23	13	40	16	27	22	18	9	27	29	13
ENSG00000070388	FGF22	fibroblast growth factor 22	3	6	4	12	4	3	2	4	6	6	7	9
ENSG00000070404	FSTL3	follistatin like 3	144	125	124	465	360	349	147	127	142	93	77	71
ENSG00000070413	DGCR2	DiGeorge syndrome critical region gene 2	246	268	210	384	254	270	244	200	253	189	175	171
ENSG00000070423	RNF126	ring finger protein 126	289	270	240	300	233	222	287	198	318	295	302	201
ENSG00000070444	MNT	MAX network transcriptional repressor	94	116	106	183	129	130	115	101	121	119	120	116
ENSG00000070476	ZXDC	ZXD family zinc finger C	33	32	25	29	22	23	22	20	30	21	16	14
ENSG00000070495	JMJD6	arginine demethylase and lysine hydroxylase	221	259	176	251	187	187	208	166	259	204	198	174
ENSG00000070501	POLB	DNA polymerase beta	166	239	168	274	206	189	193	187	232	285	264	235
ENSG00000070540	WIPI1	WD repeat domain, phosphoinositide interacting 1	129	146	113	241	149	155	113	96	151	240	210	179
ENSG00000070601	FRMPD1	FERM and PDZ domain containing 1	1	4	1	4	4	7	5	4	1	3	2	3
ENSG00000070610	GBA2	glucosylceramidase beta 2	409	458	349	588	400	424	430	303	412	410	388	330
ENSG00000070614	NDST1	N-deacetylase and N-sulfotransferase 1	162	212	155	299	190	225	245	142	194	103	95	64
ENSG00000070669	ASNS	asparagine synthetase (glutamine-hydrolyzing)	532	639	500	573	379	413	606	491	666	361	326	283
ENSG00000070718	AP3M2	adaptor related protein complex 3 mu 2 subunit	122	123	64	163	102	123	86	81	122	116	126	98
ENSG00000070729	CNGB1	cyclic nucleotide gated channel beta 1	0	0	0	0	1	1	1	0	0	0	1	0
ENSG00000070731	ST6GALNAC2	ST6 N-acetylgalactosaminide alpha-2,6-sialyltransferase 2	10	9	7	10	10	12	5	4	11	9	8	2
ENSG00000070748	CHAT	choline O-acetyltransferase	0	0	0	1	0	2	0	0	0	0	0	0
ENSG00000070756	PABPC1	poly(A) binding protein cytoplasmic 1	1316	1435	1091	2296	1460	1642	1220	1198	1589	2073	1751	1528
ENSG00000070759	TESK2	testis-specific kinase 2	6	10	7	10	10	5	8	5	9	17	10	9
ENSG00000070761	CFAP20	cilia and flagella associated protein 20	259	291	245	349	240	299	262	236	298	260	235	188
ENSG00000070770	CSNK2A2	casein kinase 2 alpha 2	234	281	237	420	307	282	304	257	299	330	319	265
ENSG00000070778	PTPN21	protein tyrosine phosphatase, non-receptor type 21	94	81	71	113	74	86	63	66	84	58	65	45
ENSG00000070785	EIF2B3	eukaryotic translation initiation factor 2B subunit gamma	120	153	121	147	98	99	147	109	134	166	149	119
ENSG00000070808	CAMK2A	calcium/calmodulin dependent protein kinase II alpha	2	4	0	4	4	3	1	0	2	0	1	0
ENSG00000070814	TCOF1	treacle ribosome biogenesis factor 1	424	541	396	727	515	510	419	340	525	423	314	302
ENSG00000070831	CDC42	cell division cycle 42	2357	2577	1969	2914	2186	2262	2465	2111	2535	1833	1671	1380
ENSG00000070882	OSBPL3	oxysterol binding protein like 3	38	52	28	37	24	28	38	38	51	38	37	32
ENSG00000070886	EPHA8	EPH receptor A8	14	21	16	35	20	20	31	17	33	19	31	11
ENSG00000070950	RAD18	RAD18, E3 ubiquitin protein ligase	33	46	25	46	30	30	34	31	56	40	47	35
ENSG00000070961	ATP2B1	ATPase plasma membrane Ca2+ transporting 1	199	215	196	345	216	246	163	191	253	182	158	127
ENSG00000070985	TRPM5	transient receptor potential cation channel subfamily M member 5	1	3	0	1	1	0	1	0	1	4	2	1
ENSG00000071051	NCK2	NCK adaptor protein 2	420	402	315	453	326	339	362	318	444	337	293	258
ENSG00000071054	MAP4K4	mitogen-activated protein kinase kinase kinase kinase 4	1053	1267	952	1413	996	1094	1108	836	1173	909	753	674
ENSG00000071073	MGAT4A	mannosyl (alpha-1,3-)-glycoprotein beta-1,4-N-acetylglucosaminyltransferase, isozyme A	22	37	25	30	22	15	31	24	43	51	40	32
ENSG00000071082	RPL31	ribosomal protein L31	13448	12978	9937	16708	13071	13157	13370	10299	14199	17061	16461	12970
ENSG00000071127	WDR1	WD repeat domain 1	393	482	393	727	503	480	438	342	457	384	382	310
ENSG00000071189	SNX13	sorting nexin 13	57	77	40	90	77	47	61	71	71	57	62	37
ENSG00000071205	ARHGAP10	Rho GTPase activating protein 10	47	52	41	101	74	91	53	43	44	31	28	15
ENSG00000071242	RPS6KA2	ribosomal protein S6 kinase A2	202	282	210	433	275	324	232	222	307	203	175	156
ENSG00000071243	ING3	inhibitor of growth family member 3	111	129	113	132	89	82	133	143	165	91	66	63
ENSG00000071246	VASH1	vasohibin 1	276	349	264	383	301	267	275	207	294	200	169	132
ENSG00000071282	LMCD1	LIM and cysteine rich domains 1	103	145	91	131	101	86	111	102	133	179	150	124
ENSG00000071462	BUD23	BUD23, rRNA methyltransferase and ribosome maturation factor	348	337	275	505	376	372	369	297	437	265	248	211
ENSG00000071537	SEL1L	SEL1L ERAD E3 ligase adaptor subunit	108	128	112	194	150	142	124	112	144	159	110	123
ENSG00000071539	TRIP13	thyroid hormone receptor interactor 13	84	98	74	108	79	56	84	73	100	84	97	59
ENSG00000071553	ATP6AP1	ATPase H+ transporting accessory protein 1	475	565	446	879	613	606	539	381	536	389	372	320
ENSG00000071564	TCF3	transcription factor 3	593	703	536	734	504	548	582	498	641	616	577	516
ENSG00000071575	TRIB2	tribbles pseudokinase 2	159	205	149	142	118	102	308	250	312	97	103	80
ENSG00000111249	CUX2	cut like homeobox 2	4	10	6	10	3	10	41	22	42	25	21	21
ENSG00000071655	MBD3	methyl-CpG binding domain protein 3	487	556	416	680	516	435	450	352	468	357	326	277
ENSG00000071794	HLTF	helicase like transcription factor	165	223	157	267	168	168	171	173	218	160	140	110
ENSG00000071859	FAM50A	family with sequence similarity 50 member A	549	600	498	802	602	610	572	424	559	431	421	394
ENSG00000071889	FAM3A	family with sequence similarity 3 member A	138	158	98	206	155	151	133	111	145	113	132	89
ENSG00000071894	CPSF1	cleavage and polyadenylation specific factor 1	137	155	121	224	145	166	154	120	142	148	155	132
ENSG00000071909	MYO3B	myosin IIIB	0	0	3	0	0	0	1	0	1	1	1	0
ENSG00000071967	CYBRD1	cytochrome b reductase 1	49	48	37	120	76	122	49	32	52	33	22	25
ENSG00000071991	CDH19	cadherin 19	1	0	0	0	1	1	0	0	0	0	0	0
ENSG00000071994	PDCD2	programmed cell death 2	548	615	458	702	461	516	579	498	634	723	665	561
ENSG00000072041	SLC6A15	solute carrier family 6 member 15	82	91	75	97	65	65	76	84	124	103	108	75
ENSG00000072042	RDH11	retinol dehydrogenase 11 (all-trans/9-cis/11-cis)	889	1124	892	1012	726	721	701	632	922	666	600	485
ENSG00000072062	PRKACA	protein kinase cAMP-activated catalytic subunit alpha	452	547	394	619	408	423	524	453	562	375	367	320
ENSG00000072071	ADGRL1	adhesion G protein-coupled receptor L1	537	674	494	1048	691	744	791	552	852	575	487	409
ENSG00000072110	ACTN1	actinin alpha 1	422	526	417	680	435	484	398	408	549	439	386	334
ENSG00000072121	ZFYVE26	zinc finger FYVE-type containing 26	24	32	23	65	33	38	21	18	47	23	25	17
ENSG00000072133	RPS6KA6	ribosomal protein S6 kinase A6	75	86	62	138	75	103	72	57	99	82	67	62
ENSG00000072134	EPN2	epsin 2	136	163	126	198	157	145	149	127	203	174	124	107
ENSG00000072135	PTPN18	protein tyrosine phosphatase, non-receptor type 18	198	224	142	212	163	185	170	145	216	221	223	198
ENSG00000072163	LIMS2	LIM zinc finger domain containing 2	8	10	7	15	11	12	7	4	9	3	10	0
ENSG00000072182	ASIC4	acid sensing ion channel subunit family member 4	49	70	33	63	61	59	21	28	24	52	53	40
ENSG00000166862	CACNG2	calcium voltage-gated channel auxiliary subunit gamma 2	2	5	7	2	2	3	15	21	34	17	15	14
ENSG00000072201	LNX1	ligand of numb-protein X 1	2	1	1	3	0	3	4	2	3	1	1	0
ENSG00000072210	ALDH3A2	aldehyde dehydrogenase 3 family member A2	206	239	191	301	204	207	221	176	226	171	171	148
ENSG00000072274	TFRC	transferrin receptor	273	308	235	301	178	173	310	302	391	242	239	191
ENSG00000072310	SREBF1	sterol regulatory element binding transcription factor 1	398	505	322	473	297	348	335	247	375	177	204	171
ENSG00000072315	TRPC5	transient receptor potential cation channel subfamily C member 5	0	0	0	0	0	0	0	1	0	0	0	0
ENSG00000072364	AFF4	AF4/FMR2 family member 4	445	573	423	737	590	571	467	406	557	364	314	291
ENSG00000072401	UBE2D1	ubiquitin conjugating enzyme E2 D1	222	226	205	234	164	188	227	199	286	222	207	187
ENSG00000072415	MPP5	membrane palmitoylated protein 5	100	94	80	102	73	66	72	53	88	99	69	59
ENSG00000072422	RHOBTB1	Rho related BTB domain containing 1	199	241	193	227	142	148	147	143	192	115	105	84
ENSG00000072501	SMC1A	structural maintenance of chromosomes 1A	237	277	224	351	234	221	264	214	286	264	231	203
ENSG00000072506	HSD17B10	hydroxysteroid 17-beta dehydrogenase 10	673	698	545	778	630	655	742	544	809	378	377	282
ENSG00000072518	MARK2	microtubule affinity regulating kinase 2	489	630	477	901	554	662	517	416	593	393	343	290
ENSG00000072571	HMMR	hyaluronan mediated motility receptor	203	154	142	113	81	95	136	141	163	293	284	258
ENSG00000072609	CHFR	checkpoint with forkhead and ring finger domains	150	178	132	198	127	129	105	104	138	84	92	69
ENSG00000072657	TRHDE	thyrotropin releasing hormone degrading enzyme	0	1	0	1	1	0	0	0	0	0	0	1
ENSG00000072682	P4HA2	prolyl 4-hydroxylase subunit alpha 2	145	168	149	237	180	167	165	146	195	156	159	117
ENSG00000072694	FCGR2B	Fc fragment of IgG receptor IIb	0	0	0	0	0	1	0	0	0	0	0	0
ENSG00000072736	NFATC3	nuclear factor of activated T-cells 3	53	74	55	92	64	58	74	61	65	77	73	56
ENSG00000072756	TRNT1	tRNA nucleotidyl transferase 1	60	57	40	78	60	56	49	51	70	47	44	36
ENSG00000072778	ACADVL	acyl-CoA dehydrogenase, very long chain	1408	1654	1180	2475	1753	1749	1462	1163	1536	1537	1528	1196
ENSG00000072786	STK10	serine/threonine kinase 10	74	102	72	140	83	70	59	63	84	50	58	41
ENSG00000072803	FBXW11	F-box and WD repeat domain containing 11	290	371	246	472	354	316	339	275	376	310	248	198
ENSG00000072818	ACAP1	ArfGAP with coiled-coil, ankyrin repeat and PH domains 1	27	43	30	114	75	71	48	30	56	71	63	65
ENSG00000072832	CRMP1	collapsin response mediator protein 1	1456	1685	1330	1076	759	710	1598	1161	1610	1295	1134	961
ENSG00000072840	EVC	EvC ciliary complex subunit 1	7	13	12	14	4	6	16	8	10	11	7	8
ENSG00000072849	DERL2	derlin 2	222	256	196	278	235	239	205	202	279	171	152	133
ENSG00000072858	SIDT1	SID1 transmembrane family member 1	0	0	0	1	0	0	1	0	0	1	0	0
ENSG00000072864	NDE1	nudE neurodevelopment protein 1	56	82	51	99	65	58	50	51	58	114	92	76
ENSG00000072952	MRVI1	murine retrovirus integration site 1 homolog	3	0	3	5	2	4	11	7	14	30	24	29
ENSG00000072954	TMEM38A	transmembrane protein 38A	54	63	47	75	53	47	53	53	77	88	74	71
ENSG00000072958	AP1M1	adaptor related protein complex 1 mu 1 subunit	515	627	430	710	456	485	511	396	530	430	348	329
ENSG00000073008	PVR	poliovirus receptor	72	75	63	85	66	52	76	54	76	25	35	29
ENSG00000073050	XRCC1	X-ray repair cross complementing 1	47	61	37	93	48	81	55	39	48	57	51	51
ENSG00000073060	SCARB1	scavenger receptor class B member 1	130	156	120	213	143	151	109	111	159	148	127	124
ENSG00000073067	CYP2W1	cytochrome P450 family 2 subfamily W member 1	1	1	2	4	5	2	1	1	2	6	6	4
ENSG00000073111	MCM2	minichromosome maintenance complex component 2	139	125	119	187	123	120	164	113	134	122	101	97
ENSG00000073146	MOV10L1	Mov10 RISC complex RNA helicase like 1	4	5	5	25	19	19	9	3	10	7	6	4
ENSG00000073150	PANX2	pannexin 2	57	72	56	118	89	76	68	33	55	27	29	26
ENSG00000073169	SELENOO	selenoprotein O	109	116	82	191	142	132	118	73	107	156	147	119
ENSG00000073282	TP63	tumor protein p63	0	1	0	0	0	0	0	0	0	0	0	1
ENSG00000073331	ALPK1	alpha kinase 1	18	21	8	26	33	27	11	14	13	10	11	10
ENSG00000073350	LLGL2	LLGL2, scribble cell polarity complex component	61	75	65	108	83	80	53	52	50	68	44	46
ENSG00000073417	PDE8A	phosphodiesterase 8A	80	74	57	89	66	58	85	69	95	67	80	61
ENSG00000073464	CLCN4	chloride voltage-gated channel 4	125	108	95	177	125	118	170	115	188	96	90	54
ENSG00000073536	NLE1	notchless homolog 1	50	57	40	75	47	57	60	46	60	92	77	76
ENSG00000073578	SDHA	succinate dehydrogenase complex flavoprotein subunit A	161	213	143	255	175	181	210	135	194	248	247	163
ENSG00000073584	SMARCE1	SWI/SNF related, matrix associated, actin dependent regulator of chromatin, subfamily e, member 1	605	677	542	738	542	544	587	489	640	582	464	422
ENSG00000073605	GSDMB	gasdermin B	19	28	13	34	33	30	15	15	18	45	49	28
ENSG00000073614	KDM5A	lysine demethylase 5A	183	216	132	353	211	244	120	114	195	149	95	106
ENSG00000073670	ADAM11	ADAM metallopeptidase domain 11	32	58	29	58	39	41	41	24	34	34	44	33
ENSG00000073711	PPP2R3A	protein phosphatase 2 regulatory subunit B''alpha	48	56	40	89	55	40	44	29	38	64	47	34
ENSG00000073712	FERMT2	fermitin family member 2	331	357	275	599	341	379	376	376	500	346	335	272
ENSG00000073792	IGF2BP2	insulin like growth factor 2 mRNA binding protein 2	3	2	3	2	2	1	5	3	5	8	6	4
ENSG00000073803	MAP3K13	mitogen-activated protein kinase kinase kinase 13	374	441	350	558	392	431	368	312	462	401	300	343
ENSG00000073849	ST6GAL1	ST6 beta-galactoside alpha-2,6-sialyltransferase 1	82	102	75	106	71	78	53	45	70	40	30	26
ENSG00000073861	TBX21	T-box 21	2	1	1	1	0	0	1	2	1	2	1	2
ENSG00000073905	VDAC1P1	voltage dependent anion channel 1 pseudogene 1	0	1	0	1	3	2	1	2	2	2	2	0
ENSG00000073910	FRY	FRY microtubule binding protein	50	83	48	94	67	78	54	49	77	52	31	49
ENSG00000073921	PICALM	phosphatidylinositol binding clathrin assembly protein	374	452	353	618	409	398	400	334	389	399	376	295
ENSG00000073969	NSF	N-ethylmaleimide sensitive factor, vesicle fusing ATPase	166	221	169	306	178	195	204	176	229	195	153	129
ENSG00000074047	GLI2	GLI family zinc finger 2	19	13	14	24	11	9	15	6	17	11	6	6
ENSG00000074054	CLASP1	cytoplasmic linker associated protein 1	159	190	135	245	180	168	167	138	208	183	146	107
ENSG00000074071	MRPS34	mitochondrial ribosomal protein S34	602	597	462	786	633	625	678	540	743	554	552	450
ENSG00000074181	NOTCH3	notch 3	348	395	297	670	413	442	395	264	377	435	389	369
ENSG00000074201	CLNS1A	chloride nucleotide-sensitive channel 1A	693	773	567	926	649	638	682	626	807	1024	935	792
ENSG00000074211	PPP2R2C	protein phosphatase 2 regulatory subunit Bgamma	4	7	8	3	1	4	27	34	33	39	39	42
ENSG00000074219	TEAD2	TEA domain transcription factor 2	434	460	337	545	362	366	471	310	452	247	224	185
ENSG00000074266	EED	embryonic ectoderm development	102	126	90	146	113	127	93	86	132	114	96	98
ENSG00000074276	CDHR2	cadherin related family member 2	188	185	134	240	151	171	232	158	238	195	168	159
ENSG00000074317	SNCB	synuclein beta	23	26	17	41	20	25	43	39	50	38	26	19
ENSG00000074319	TSG101	tumor susceptibility 101	627	757	552	894	684	711	681	559	717	649	631	488
ENSG00000074356	NCBP3	nuclear cap binding subunit 3	150	189	155	250	156	171	164	124	179	129	104	102
ENSG00000074370	ATP2A3	ATPase sarcoplasmic/endoplasmic reticulum Ca2+ transporting 3	28	46	35	46	19	32	28	23	42	22	31	19
ENSG00000074410	CA12	carbonic anhydrase 12	84	56	63	339	174	223	109	91	137	46	47	37
ENSG00000074416	MGLL	monoglyceride lipase	56	51	45	105	69	75	44	37	71	42	28	22
ENSG00000074527	NTN4	netrin 4	84	83	77	166	109	95	59	53	62	23	30	26
ENSG00000074582	BCS1L	BCS1 homolog, ubiquinol-cytochrome c reductase complex chaperone	147	143	102	213	130	148	168	120	182	115	130	101
ENSG00000074590	NUAK1	NUAK family kinase 1	9	16	13	38	26	27	9	15	17	9	4	5
ENSG00000074603	DPP8	dipeptidyl peptidase 8	190	230	168	306	168	204	185	156	200	180	162	118
ENSG00000074621	SLC24A1	solute carrier family 24 member 1	9	8	6	10	11	14	11	6	10	8	5	4
ENSG00000074657	ZNF532	zinc finger protein 532	60	77	51	12	11	15	79	75	82	88	57	54
ENSG00000074660	SCARF1	scavenger receptor class F member 1	0	0	3	4	5	2	2	0	5	3	5	1
ENSG00000074695	LMAN1	lectin, mannose binding 1	284	323	231	526	342	349	294	321	420	638	478	442
ENSG00000074696	HACD3	3-hydroxyacyl-CoA dehydratase 3	545	562	484	753	456	560	488	495	648	499	479	364
ENSG00000074706	IPCEF1	interaction protein for cytohesin exchange factors 1	0	0	0	0	0	0	0	0	0	1	0	0
ENSG00000074755	ZZEF1	zinc finger ZZ-type and EF-hand domain containing 1	60	81	38	74	68	59	49	39	70	66	55	49
ENSG00000074771	NOX3	NADPH oxidase 3	0	0	0	0	1	1	0	0	0	0	0	0
ENSG00000074800	ENO1	enolase 1	3798	4145	3238	3752	2672	2765	5044	3820	5217	2567	2395	2089
ENSG00000074803	SLC12A1	solute carrier family 12 member 1	1	0	0	2	1	0	0	0	3	0	1	1
ENSG00000074842	MYDGF	myeloid derived growth factor	794	864	648	1531	1088	1144	1024	740	1027	761	811	622
ENSG00000074855	ANO8	anoctamin 8	150	201	136	241	173	167	147	109	182	140	143	95
ENSG00000074935	TUBE1	tubulin epsilon 1	55	50	34	63	38	30	53	49	53	35	52	33
ENSG00000074964	ARHGEF10L	Rho guanine nucleotide exchange factor 10 like	100	120	93	152	104	116	78	68	80	40	52	45
ENSG00000074966	TXK	TXK tyrosine kinase	11	19	9	8	8	5	17	21	24	9	6	1
ENSG00000075035	WSCD2	WSC domain containing 2	1	1	1	0	0	0	2	4	5	1	8	5
ENSG00000075043	KCNQ2	potassium voltage-gated channel subfamily Q member 2	1163	1239	926	1149	732	792	1530	1105	1582	1763	1675	1352
ENSG00000075073	TACR2	tachykinin receptor 2	0	0	0	2	0	0	0	0	0	0	0	1
ENSG00000075089	ACTR6	ARP6 actin-related protein 6 homolog	161	162	127	197	154	138	118	135	146	206	200	167
ENSG00000075131	TIPIN	TIMELESS interacting protein	53	76	39	62	38	44	62	47	71	61	31	34
ENSG00000075142	SRI	sorcin	1132	1390	937	1243	956	1029	1121	1041	1285	988	835	764
ENSG00000075151	EIF4G3	eukaryotic translation initiation factor 4 gamma 3	211	296	213	316	197	234	222	186	246	218	181	161
ENSG00000075188	NUP37	nucleoporin 37	123	108	71	133	106	99	93	106	110	165	148	88
ENSG00000075213	SEMA3A	semaphorin 3A	199	251	187	169	136	121	145	112	161	64	41	51
ENSG00000075218	GTSE1	G2 and S-phase expressed 1	85	117	99	101	62	67	90	86	101	160	142	135
ENSG00000158089	GALNT14	polypeptide N-acetylgalactosaminyltransferase 14	6	7	7	4	1	3	22	28	38	27	26	10
ENSG00000075234	TTC38	tetratricopeptide repeat domain 38	99	114	86	194	130	122	123	86	125	85	102	84
ENSG00000075239	ACAT1	acetyl-CoA acetyltransferase 1	333	349	275	434	344	369	333	297	424	336	275	233
ENSG00000075240	GRAMD4	GRAM domain containing 4	91	129	97	140	104	106	114	83	121	73	75	47
ENSG00000075275	CELSR1	cadherin EGF LAG seven-pass G-type receptor 1	20	17	17	11	5	14	8	10	11	19	9	9
ENSG00000075290	WNT8B	Wnt family member 8B	1	0	0	1	0	1	0	0	0	0	0	0
ENSG00000075292	ZNF638	zinc finger protein 638	83	121	100	149	125	100	106	99	118	98	95	61
ENSG00000075303	SLC25A40	solute carrier family 25 member 40	101	135	101	132	79	78	128	90	129	155	128	96
ENSG00000075336	TIMM21	translocase of inner mitochondrial membrane 21	92	88	87	126	94	106	86	96	126	69	82	52
ENSG00000075340	ADD2	adducin 2	193	227	166	250	147	162	236	173	236	211	197	183
ENSG00000075391	RASAL2	RAS protein activator like 2	36	47	38	62	52	48	31	26	44	38	35	27
ENSG00000075399	VPS9D1	VPS9 domain containing 1	86	96	66	150	108	111	86	68	79	64	66	59
ENSG00000075407	ZNF37A	zinc finger protein 37A	88	107	71	143	98	106	79	59	84	64	60	41
ENSG00000075413	MARK3	microtubule affinity regulating kinase 3	235	290	200	328	244	270	249	198	284	243	232	203
ENSG00000075415	SLC25A3	solute carrier family 25 member 3	2487	2927	2193	3070	2174	2375	2440	2127	2743	3589	3134	2779
ENSG00000075420	FNDC3B	fibronectin type III domain containing 3B	105	148	98	235	147	147	123	102	129	82	77	71
ENSG00000075426	FOSL2	FOS like 2, AP-1 transcription factor subunit	60	68	56	103	97	90	80	74	81	47	54	31
ENSG00000075429	CACNG5	calcium voltage-gated channel auxiliary subunit gamma 5	0	0	0	0	0	0	0	1	0	0	0	0
ENSG00000075461	CACNG4	calcium voltage-gated channel auxiliary subunit gamma 4	262	294	227	205	119	113	291	202	280	193	190	150
ENSG00000075539	FRYL	FRY like transcription coactivator	82	91	77	159	87	119	80	57	124	123	81	108
ENSG00000075568	TMEM131	transmembrane protein 131	54	75	65	132	92	72	71	59	83	77	58	43
ENSG00000075618	FSCN1	fascin actin-bundling protein 1	4459	5007	3928	4666	3135	3207	5344	3994	5210	4122	3756	3170
ENSG00000075624	ACTB	actin beta	13079	15363	12169	15807	11096	11799	13525	11522	15231	8510	8003	6902
ENSG00000075643	MOCOS	molybdenum cofactor sulfurase	9	6	6	24	10	14	4	5	15	12	3	6
ENSG00000075651	PLD1	phospholipase D1	13	18	12	64	54	42	22	23	25	27	29	28
ENSG00000075673	ATP12A	ATPase H+/K+ transporting non-gastric alpha2 subunit	0	0	0	0	0	0	0	0	0	1	1	1
ENSG00000075702	WDR62	WD repeat domain 62	26	40	20	42	34	27	33	19	33	31	37	30
ENSG00000075711	DLG1	discs large MAGUK scaffold protein 1	175	190	148	314	163	224	175	130	195	194	176	145
ENSG00000075785	RAB7A	RAB7A, member RAS oncogene family	1365	1594	1234	1983	1397	1387	1414	1110	1491	1041	838	762
ENSG00000075790	BCAP29	B-cell receptor associated protein 29	347	311	279	370	264	293	258	268	327	222	222	184
ENSG00000075826	SEC31B	SEC31 homolog B, COPII coat complex component	28	52	16	42	25	25	24	20	18	26	25	23
ENSG00000075856	SART3	squamous cell carcinoma antigen recognized by T-cells 3	115	147	105	167	128	123	138	98	146	136	124	108
ENSG00000075884	ARHGAP15	Rho GTPase activating protein 15	0	0	2	0	0	1	1	1	0	2	0	0
ENSG00000075886	TUBA3D	tubulin alpha 3d	0	1	0	0	0	0	0	0	1	0	1	0
ENSG00000075891	PAX2	paired box 2	2	1	1	1	2	0	1	2	3	8	5	5
ENSG00000075914	EXOSC7	exosome component 7	175	198	153	248	195	199	158	161	187	209	202	192
ENSG00000075945	KIFAP3	kinesin associated protein 3	262	287	241	356	257	231	217	207	261	302	259	203
ENSG00000075975	MKRN2	makorin ring finger protein 2	372	423	354	495	341	348	355	326	423	459	404	316
ENSG00000076003	MCM6	minichromosome maintenance complex component 6	183	188	155	245	169	195	229	158	246	143	139	139
ENSG00000076043	REXO2	RNA exonuclease 2	390	441	296	785	564	573	518	401	544	327	312	251
ENSG00000076053	RBM7	RNA binding motif protein 7	113	113	67	160	101	104	107	87	132	93	82	67
ENSG00000076067	RBMS2	RNA binding motif single stranded interacting protein 2	69	86	62	134	67	94	79	52	75	69	61	58
ENSG00000076108	BAZ2A	bromodomain adjacent to zinc finger domain 2A	304	359	248	494	329	349	281	213	287	370	276	217
ENSG00000076201	PTPN23	protein tyrosine phosphatase, non-receptor type 23	176	218	149	292	183	198	150	127	168	194	181	158
ENSG00000076242	MLH1	mutL homolog 1	122	158	141	198	131	134	127	106	138	127	119	94
ENSG00000076248	UNG	uracil DNA glycosylase	143	163	133	209	153	176	138	125	164	109	91	67
ENSG00000076258	FMO4	flavin containing monooxygenase 4	0	2	0	3	1	0	4	0	1	0	2	1
ENSG00000076321	KLHL20	kelch like family member 20	98	132	70	157	116	111	92	88	114	66	45	39
ENSG00000145087	STXBP5L	syntaxin binding protein 5 like	6	5	6	4	5	3	33	19	20	20	14	13
ENSG00000076351	SLC46A1	solute carrier family 46 member 1	44	45	24	56	40	53	43	28	36	30	24	17
ENSG00000173406	DAB1	DAB1, reelin adaptor protein	3	2	2	1	2	2	9	10	7	8	8	9
ENSG00000076382	SPAG5	sperm associated antigen 5	159	171	130	138	93	110	124	110	152	257	201	200
ENSG00000076513	ANKRD13A	ankyrin repeat domain 13A	65	76	60	143	100	72	71	63	67	50	58	44
ENSG00000076554	TPD52	tumor protein D52	158	160	136	149	98	111	121	114	140	201	155	115
ENSG00000076555	ACACB	acetyl-CoA carboxylase beta	69	99	51	114	61	82	97	60	101	97	78	77
ENSG00000076604	TRAF4	TNF receptor associated factor 4	49	35	32	39	25	33	58	21	52	14	18	16
ENSG00000076641	PAG1	phosphoprotein membrane anchor with glycosphingolipid microdomains 1	129	167	124	433	282	326	141	118	174	41	58	51
ENSG00000076650	GPATCH1	G-patch domain containing 1	27	29	19	35	26	30	29	17	37	21	18	16
ENSG00000076685	NT5C2	5'-nucleotidase, cytosolic II	4	6	0	6	5	3	4	0	7	15	15	11
ENSG00000076706	MCAM	melanoma cell adhesion molecule	168	198	151	274	187	183	181	161	184	164	137	104
ENSG00000076716	GPC4	glypican 4	22	31	25	55	48	46	30	27	46	28	21	17
ENSG00000076770	MBNL3	muscleblind like splicing regulator 3	20	20	20	35	21	16	25	12	19	10	8	2
ENSG00000076826	CAMSAP3	calmodulin regulated spectrin associated protein family member 3	53	97	62	98	66	73	76	43	69	79	77	45
ENSG00000076864	RAP1GAP	RAP1 GTPase activating protein	58	73	51	119	75	76	86	67	104	93	89	73
ENSG00000076924	XAB2	XPA binding protein 2	69	58	48	89	65	60	62	51	52	94	82	67
ENSG00000076928	ARHGEF1	Rho guanine nucleotide exchange factor 1	150	163	114	239	106	150	132	128	153	107	106	97
ENSG00000076944	STXBP2	syntaxin binding protein 2	33	25	27	23	11	13	17	13	21	20	28	30
ENSG00000076984	MAP2K7	mitogen-activated protein kinase kinase 7	242	274	174	325	186	237	198	169	225	240	223	179
ENSG00000077009	NMRK2	nicotinamide riboside kinase 2	4	4	3	3	2	3	2	0	4	3	3	2
ENSG00000077044	DGKD	diacylglycerol kinase delta	119	145	96	223	137	181	132	92	149	135	104	106
ENSG00000077063	CTTNBP2	cortactin binding protein 2	0	0	0	0	0	0	0	0	0	0	1	0
ENSG00000077080	ACTL6B	actin like 6B	124	148	96	172	121	122	212	172	225	95	107	80
ENSG00000077092	RARB	retinoic acid receptor beta	570	673	509	617	390	430	493	479	650	1087	844	806
ENSG00000077097	TOP2B	topoisomerase (DNA) II beta	360	465	352	492	345	354	371	318	423	386	336	291
ENSG00000077147	TM9SF3	transmembrane 9 superfamily member 3	605	647	476	870	630	624	561	514	656	644	516	421
ENSG00000077150	NFKB2	nuclear factor kappa B subunit 2	63	78	69	203	138	111	122	75	127	266	238	199
ENSG00000077152	UBE2T	ubiquitin conjugating enzyme E2 T	983	1053	766	857	548	584	1021	828	1161	1583	1319	1181
ENSG00000077157	PPP1R12B	protein phosphatase 1 regulatory subunit 12B	48	53	29	51	29	30	54	38	44	64	66	36
ENSG00000077232	DNAJC10	DnaJ heat shock protein family (Hsp40) member C10	269	281	202	488	367	353	246	231	262	216	189	163
ENSG00000077235	GTF3C1	general transcription factor IIIC subunit 1	170	248	168	316	199	210	203	145	225	180	198	130
ENSG00000077238	IL4R	interleukin 4 receptor	46	42	39	83	59	58	59	46	45	16	22	20
ENSG00000077254	USP33	ubiquitin specific peptidase 33	246	261	177	296	250	246	198	193	255	224	191	146
ENSG00000077264	PAK3	p21 (RAC1) activated kinase 3	60	89	58	103	53	62	59	53	103	69	62	68
ENSG00000077274	CAPN6	calpain 6	12	18	16	23	13	15	50	48	53	31	27	26
ENSG00000077279	DCX	doublecortin	240	360	280	280	190	206	613	570	755	416	350	304
ENSG00000077312	SNRPA	small nuclear ribonucleoprotein polypeptide A	340	351	281	377	257	254	460	280	425	636	586	524
ENSG00000077327	SPAG6	sperm associated antigen 6	37	37	34	80	48	50	29	26	38	40	31	32
ENSG00000077348	EXOSC5	exosome component 5	78	80	67	81	93	76	95	74	88	113	95	75
ENSG00000077380	DYNC1I2	dynein cytoplasmic 1 intermediate chain 2	786	875	717	1010	660	658	536	638	837	493	457	368
ENSG00000077454	LRCH4	leucine rich repeats and calponin homology domain containing 4	164	228	155	226	173	192	169	132	167	245	227	202
ENSG00000077458	FAM76B	family with sequence similarity 76 member B	85	103	59	122	88	70	96	75	81	105	83	60
ENSG00000077463	SIRT6	sirtuin 6	186	214	164	280	181	225	221	157	239	146	121	117
ENSG00000077514	POLD3	DNA polymerase delta 3, accessory subunit	25	47	24	53	50	36	47	26	41	54	37	35
ENSG00000077522	ACTN2	actinin alpha 2	9	6	5	15	7	3	11	5	11	12	8	15
ENSG00000077549	CAPZB	capping actin protein of muscle Z-line beta subunit	799	897	630	949	677	688	850	730	956	689	663	562
ENSG00000077585	GPR137B	G protein-coupled receptor 137B	41	79	53	93	78	71	46	47	72	44	45	43
ENSG00000077616	NAALAD2	N-acetylated alpha-linked acidic dipeptidase 2	87	112	86	164	116	123	70	67	78	49	48	42
ENSG00000077684	JADE1	jade family PHD finger 1	78	96	60	102	71	83	76	55	84	82	87	67
ENSG00000077713	SLC25A43	solute carrier family 25 member 43	1	2	1	0	0	0	1	0	2	0	5	0
ENSG00000077721	UBE2A	ubiquitin conjugating enzyme E2 A	340	348	299	429	268	352	302	298	390	318	273	233
ENSG00000077782	FGFR1	fibroblast growth factor receptor 1	353	461	304	715	443	459	481	364	508	274	250	193
ENSG00000077800	FKBP6	FK506 binding protein 6	0	1	0	0	0	0	0	0	1	1	1	0
ENSG00000077935	SMC1B	structural maintenance of chromosomes 1B	1	0	0	1	0	0	1	0	1	1	0	0
ENSG00000077942	FBLN1	fibulin 1	978	1034	765	1168	880	869	1025	767	1088	1163	1023	907
ENSG00000077943	ITGA8	integrin subunit alpha 8	1	1	0	0	0	0	1	0	1	0	0	0
ENSG00000078018	MAP2	microtubule associated protein 2	309	391	281	459	307	276	451	410	562	322	328	281
ENSG00000078043	PIAS2	protein inhibitor of activated STAT 2	101	128	79	142	99	92	93	105	117	98	72	74
ENSG00000078053	AMPH	amphiphysin	14	26	18	2	1	2	3	0	2	4	0	2
ENSG00000078061	ARAF	A-Raf proto-oncogene, serine/threonine kinase	106	117	97	142	91	96	105	86	128	94	100	74
ENSG00000078070	MCCC1	methylcrotonoyl-CoA carboxylase 1	87	89	66	79	68	52	72	55	85	72	51	34
ENSG00000078081	LAMP3	lysosomal associated membrane protein 3	4	3	4	3	1	1	1	3	4	9	5	4
ENSG00000078098	FAP	fibroblast activation protein alpha	2	6	4	39	20	33	4	5	3	13	8	10
ENSG00000078114	NEBL	nebulette	295	256	216	229	166	133	328	250	309	267	203	180
ENSG00000078124	ACER3	alkaline ceramidase 3	152	158	109	164	138	135	157	142	160	132	99	84
ENSG00000078140	UBE2K	ubiquitin conjugating enzyme E2 K	454	499	387	500	421	390	424	443	497	407	398	337
ENSG00000078142	PIK3C3	phosphatidylinositol 3-kinase catalytic subunit type 3	146	192	110	239	173	160	127	117	161	112	99	90
ENSG00000078177	N4BP2	NEDD4 binding protein 2	46	57	34	49	38	41	41	39	43	34	45	33
ENSG00000078237	TIGAR	TP53 induced glycolysis regulatory phosphatase	89	113	83	104	74	80	124	77	116	53	56	36
ENSG00000078246	TULP3	tubby like protein 3	152	172	141	203	160	144	135	106	162	139	108	114
ENSG00000078269	SYNJ2	synaptojanin 2	28	37	24	56	40	38	25	28	33	17	11	23
ENSG00000078295	ADCY2	adenylate cyclase 2	2	2	0	0	0	1	0	1	0	0	0	0
ENSG00000078304	PPP2R5C	protein phosphatase 2 regulatory subunit B'gamma	1127	1231	894	1727	1101	1184	1174	1111	1259	1165	1025	846
ENSG00000078319	PMS2P1	PMS1 homolog 2, mismatch repair system component pseudogene 1	34	28	15	31	43	32	25	33	27	32	26	27
ENSG00000078328	RBFOX1	RNA binding protein, fox-1 homolog 1	0	0	0	0	0	1	0	0	0	1	1	0
ENSG00000078369	GNB1	G protein subunit beta 1	2957	3482	2621	3818	2540	2579	3047	2399	3298	2498	2246	1954
ENSG00000078399	HOXA9	homeobox A9	0	0	0	0	0	0	1	0	0	0	0	0
ENSG00000078401	EDN1	endothelin 1	3	0	1	0	1	0	0	2	1	1	1	2
ENSG00000078403	MLLT10	myeloid/lymphoid or mixed-lineage leukemia; translocated to, 10	124	112	84	156	89	94	102	90	130	132	132	104
ENSG00000078487	ZCWPW1	zinc finger CW-type and PWWP domain containing 1	10	10	4	12	8	16	7	4	8	9	5	11
ENSG00000078549	ADCYAP1R1	ADCYAP receptor type I	69	82	49	85	43	58	49	48	65	49	41	25
ENSG00000078579	FGF20	fibroblast growth factor 20	5	5	2	3	3	4	2	1	2	2	1	4
ENSG00000078589	P2RY10	purinergic receptor P2Y10	0	0	0	0	1	0	0	0	0	0	0	0
ENSG00000078596	ITM2A	integral membrane protein 2A	35	33	28	11	9	11	18	16	21	30	26	20
ENSG00000078618	NRDC	nardilysin convertase	462	525	398	657	386	405	376	259	395	479	466	370
ENSG00000078668	VDAC3	voltage dependent anion channel 3	590	681	468	669	471	489	616	463	649	496	461	360
ENSG00000165105	RASEF	RAS and EF-hand domain containing	9	7	3	1	0	4	19	23	26	23	13	14
ENSG00000078687	TNRC6C	trinucleotide repeat containing 6C	171	265	166	351	206	291	122	129	227	134	111	98
ENSG00000078699	CBFA2T2	CBFA2/RUNX1 translocation partner 2	196	263	172	280	199	199	219	180	235	277	226	208
ENSG00000125657	TNFSF9	TNF superfamily member 9	4	10	5	8	8	6	20	19	25	31	31	23
ENSG00000078747	ITCH	itchy E3 ubiquitin protein ligase	26	29	36	57	35	32	47	20	45	35	36	29
ENSG00000078795	PKD2L2	polycystin 2 like 2, transient receptor potential cation channel	0	2	1	3	1	1	0	0	1	0	0	1
ENSG00000078804	TP53INP2	tumor protein p53 inducible nuclear protein 2	376	447	334	449	336	319	330	237	307	192	184	145
ENSG00000078808	SDF4	stromal cell derived factor 4	540	574	413	1200	852	869	577	487	622	447	409	335
ENSG00000078814	MYH7B	myosin heavy chain 7B	88	95	79	136	89	87	90	65	81	72	62	66
ENSG00000078900	TP73	tumor protein p73	17	17	8	34	25	27	10	10	8	34	14	16
ENSG00000078902	TOLLIP	toll interacting protein	244	238	203	324	209	245	254	178	277	200	162	128
ENSG00000078967	UBE2D4	ubiquitin conjugating enzyme E2 D4 (putative)	274	300	221	352	224	237	305	264	281	267	195	170
ENSG00000079101	CLUL1	clusterin like 1	20	20	11	20	15	10	23	21	24	47	26	22
ENSG00000079102	RUNX1T1	RUNX1 translocation partner 1	103	104	93	139	111	104	53	73	78	34	37	28
ENSG00000079112	CDH17	cadherin 17	0	0	0	0	0	0	0	0	1	2	0	0
ENSG00000079134	THOC1	THO complex 1	141	165	111	196	134	145	134	123	141	129	122	116
ENSG00000079150	FKBP7	FK506 binding protein 7	441	448	361	814	618	596	461	382	535	592	564	453
ENSG00000079156	OSBPL6	oxysterol binding protein like 6	44	59	63	85	41	55	55	42	66	71	55	56
ENSG00000079246	XRCC5	X-ray repair cross complementing 5	1324	1318	1103	1565	1049	1125	1237	1078	1399	1155	1168	934
ENSG00000079263	SP140	SP140 nuclear body protein	0	1	1	0	0	0	0	0	0	0	1	0
ENSG00000079277	MKNK1	MAP kinase interacting serine/threonine kinase 1	84	80	70	107	86	74	79	64	80	109	83	66
ENSG00000079308	TNS1	tensin 1	120	124	82	329	209	225	113	96	114	68	67	51
ENSG00000079313	REXO1	RNA exonuclease 1 homolog	78	107	92	136	97	99	92	78	121	76	100	68
ENSG00000176956	LY6H	lymphocyte antigen 6 family member H	8	5	1	1	2	0	20	11	14	23	7	14
ENSG00000079335	CDC14A	cell division cycle 14A	16	9	4	17	12	7	8	5	6	18	20	13
ENSG00000079337	RAPGEF3	Rap guanine nucleotide exchange factor 3	4	7	7	8	6	5	7	5	3	7	3	9
ENSG00000079385	CEACAM1	carcinoembryonic antigen related cell adhesion molecule 1	0	2	1	0	0	2	1	1	3	0	0	1
ENSG00000079387	SENP1	SUMO1/sentrin specific peptidase 1	64	54	59	94	61	71	63	45	75	51	55	45
ENSG00000079393	DUSP13	dual specificity phosphatase 13	10	10	6	9	2	5	2	2	10	8	3	5
ENSG00000079432	CIC	capicua transcriptional repressor	222	253	185	340	225	228	174	114	198	116	124	92
ENSG00000079435	LIPE	lipase E, hormone sensitive type	7	11	9	14	10	11	10	8	5	5	10	8
ENSG00000079459	FDFT1	farnesyl-diphosphate farnesyltransferase 1	3700	4195	3044	2265	1607	1760	1448	1239	1628	1899	1778	1467
ENSG00000079462	PAFAH1B3	platelet activating factor acetylhydrolase 1b catalytic subunit 3	864	912	647	998	763	760	944	680	931	639	578	479
ENSG00000079482	OPHN1	oligophrenin 1	13	12	14	15	18	21	9	12	9	8	3	4
ENSG00000079616	KIF22	kinesin family member 22	181	220	161	193	130	145	208	161	208	292	248	220
ENSG00000079689	SCGN	secretagogin, EF-hand calcium binding protein	68	65	36	45	36	31	137	89	113	178	184	135
ENSG00000079691	CARMIL1	capping protein regulator and myosin 1 linker 1	34	38	34	74	43	57	57	50	54	27	26	28
ENSG00000079739	PGM1	phosphoglucomutase 1	414	422	291	515	338	357	386	334	427	439	404	319
ENSG00000079785	DDX1	DEAD-box helicase 1	610	697	519	741	546	538	561	489	640	464	431	327
ENSG00000079805	DNM2	dynamin 2	336	386	271	483	333	330	294	243	319	357	326	287
ENSG00000079819	EPB41L2	erythrocyte membrane protein band 4.1 like 2	7	9	9	11	9	1	4	3	10	11	10	5
ENSG00000079841	RIMS1	regulating synaptic membrane exocytosis 1	5	3	6	7	4	7	4	6	11	6	8	2
ENSG00000079931	MOXD1	monooxygenase DBH like 1	1	0	0	1	0	0	0	0	0	8	5	1
ENSG00000079950	STX7	syntaxin 7	108	127	99	151	114	93	109	113	135	158	131	108
ENSG00000079974	RABL2B	RAB, member of RAS oncogene family like 2B	60	58	45	89	71	72	69	44	69	58	49	50
ENSG00000079999	KEAP1	kelch like ECH associated protein 1	301	328	244	452	325	344	298	195	295	174	195	126
ENSG00000080007	DDX43	DEAD-box helicase 43	0	0	0	0	0	0	0	1	0	0	0	1
ENSG00000080031	PTPRH	protein tyrosine phosphatase, receptor type H	41	42	34	84	35	51	41	24	33	29	23	26
ENSG00000080166	DCT	dopachrome tautomerase	4	5	5	21	11	19	5	1	3	13	11	12
ENSG00000080189	SLC35C2	solute carrier family 35 member C2	307	334	257	422	319	323	298	215	271	316	269	215
ENSG00000080200	CRYBG3	crystallin beta-gamma domain containing 3	2	2	2	5	1	3	1	0	1	3	0	1
ENSG00000080224	EPHA6	EPH receptor A6	6	4	3	1	0	1	7	6	6	20	12	10
ENSG00000080298	RFX3	regulatory factor X3	54	75	60	96	60	61	55	47	65	108	89	89
ENSG00000080345	RIF1	replication timing regulatory factor 1	101	127	104	169	124	108	85	98	89	120	99	82
ENSG00000080371	RAB21	RAB21, member RAS oncogene family	263	289	224	410	270	305	254	264	271	208	180	156
ENSG00000080493	SLC4A4	solute carrier family 4 member 4	1	0	2	0	0	0	0	0	0	0	0	1
ENSG00000080503	SMARCA2	SWI/SNF related, matrix associated, actin dependent regulator of chromatin, subfamily a, member 2	81	101	81	116	98	88	103	83	112	70	62	56
ENSG00000080511	RDH8	retinol dehydrogenase 8 (all-trans)	0	0	0	1	0	0	0	0	0	0	0	0
ENSG00000080546	SESN1	sestrin 1	94	105	102	145	97	108	89	69	98	118	111	107
ENSG00000080561	MID2	midline 2	1	3	0	0	0	0	1	1	0	0	1	0
ENSG00000080572	PIH1D3	PIH1 domain containing 3	0	1	0	0	0	0	0	0	0	0	0	0
ENSG00000080573	COL5A3	collagen type V alpha 3 chain	0	0	0	0	1	1	0	2	0	2	0	2
ENSG00000080603	SRCAP	Snf2 related CREBBP activator protein	100	126	92	160	84	107	94	85	94	102	59	106
ENSG00000080608	PUM3	pumilio RNA binding family member 3	96	118	77	148	101	74	79	96	102	118	101	96
ENSG00000080618	CPB2	carboxypeptidase B2	0	0	0	1	0	0	0	1	0	0	0	0
ENSG00000080644	CHRNA3	cholinergic receptor nicotinic alpha 3 subunit	1990	2391	1850	2174	1423	1512	1517	1247	1626	974	888	784
ENSG00000080709	KCNN2	potassium calcium-activated channel subfamily N member 2	0	0	0	0	0	0	3	0	2	2	0	1
ENSG00000080802	CNOT4	CCR4-NOT transcription complex subunit 4	100	115	97	180	109	114	111	90	88	96	92	74
ENSG00000080815	PSEN1	presenilin 1	271	301	235	409	301	279	242	216	250	306	250	229
ENSG00000080819	CPOX	coproporphyrinogen oxidase	84	93	63	113	67	72	83	76	92	106	79	79
ENSG00000080822	CLDND1	claudin domain containing 1	676	735	520	711	504	576	589	530	694	768	612	556
ENSG00000080823	MOK	MOK protein kinase	9	11	10	20	16	22	12	14	13	12	7	6
ENSG00000080824	HSP90AA1	heat shock protein 90 alpha family class A member 1	5827	6705	5085	7377	5259	5672	5894	5827	7879	3778	3189	2901
ENSG00000080839	RBL1	RB transcriptional corepressor like 1	29	34	21	28	30	29	18	15	9	20	25	27
ENSG00000080845	DLGAP4	DLG associated protein 4	358	428	355	471	347	330	392	284	408	469	447	357
ENSG00000080854	IGSF9B	immunoglobulin superfamily member 9B	2	9	4	7	8	4	5	6	7	1	0	0
ENSG00000080947	CROCCP3	ciliary rootlet coiled-coil, rootletin pseudogene 3	3	7	5	15	6	10	8	5	3	4	7	3
ENSG00000080986	NDC80	NDC80, kinetochore complex component	96	114	97	98	82	81	94	80	136	163	123	109
ENSG00000081014	AP4E1	adaptor related protein complex 4 epsilon 1 subunit	31	41	32	46	36	56	41	38	38	47	38	43
ENSG00000081019	RSBN1	round spermatid basic protein 1	106	112	97	138	114	89	92	94	107	94	81	93
ENSG00000081026	MAGI3	membrane associated guanylate kinase, WW and PDZ domain containing 3	101	137	100	178	81	113	133	102	152	137	130	85
ENSG00000081041	CXCL2	C-X-C motif chemokine ligand 2	0	0	0	0	0	0	0	0	0	3	1	3
ENSG00000081052	COL4A4	collagen type IV alpha 4 chain	1	0	4	4	2	3	6	2	6	2	1	0
ENSG00000081059	TCF7	transcription factor 7 (T-cell specific, HMG-box)	35	43	30	68	46	45	38	42	51	47	42	43
ENSG00000081087	OSTM1	osteopetrosis associated transmembrane protein 1	156	168	129	225	142	161	135	187	195	158	141	108
ENSG00000081138	CDH7	cadherin 7	5	14	5	6	8	3	4	10	11	2	14	1
ENSG00000081148	IMPG2	interphotoreceptor matrix proteoglycan 2	1	3	1	2	0	1	0	0	1	0	1	1
ENSG00000081154	PCNP	PEST proteolytic signal containing nuclear protein	640	794	521	728	437	572	704	625	834	717	659	616
ENSG00000081177	EXD2	exonuclease 3'-5' domain containing 2	149	170	115	178	124	112	131	103	124	103	84	88
ENSG00000081181	ARG2	arginase 2	458	519	365	616	466	451	421	352	528	454	409	387
ENSG00000081189	MEF2C	myocyte enhancer factor 2C	31	35	32	56	37	56	27	42	36	12	24	25
ENSG00000081237	PTPRC	protein tyrosine phosphatase, receptor type C	3	1	0	0	0	0	2	2	2	0	1	0
ENSG00000081248	CACNA1S	calcium voltage-gated channel subunit alpha1 S	0	0	0	0	1	0	0	0	0	0	1	0
ENSG00000081277	PKP1	plakophilin 1	0	0	2	0	0	0	0	0	0	0	0	0
ENSG00000081307	UBA5	ubiquitin like modifier activating enzyme 5	149	137	97	169	127	145	141	107	153	110	113	96
ENSG00000081320	STK17B	serine/threonine kinase 17b	66	75	51	53	39	45	86	97	84	99	65	72
ENSG00000081377	CDC14B	cell division cycle 14B	76	85	52	81	69	81	63	58	80	65	64	67
ENSG00000081386	ZNF510	zinc finger protein 510	42	29	25	42	36	43	21	28	35	41	38	41
ENSG00000081479	LRP2	LDL receptor related protein 2	0	1	0	0	0	0	0	0	0	1	0	1
ENSG00000081665	ZNF506	zinc finger protein 506	44	63	38	75	50	37	35	39	51	58	53	43
ENSG00000081692	JMJD4	jumonji domain containing 4	102	93	73	110	78	90	114	72	92	68	62	49
ENSG00000081721	DUSP12	dual specificity phosphatase 12	188	218	157	220	147	158	177	146	170	194	115	129
ENSG00000081760	AACS	acetoacetyl-CoA synthetase	232	306	228	175	115	124	135	115	157	116	107	102
ENSG00000081791	KIAA0141	KIAA0141	123	154	128	184	154	132	136	85	138	133	123	101
ENSG00000081800	SLC13A1	solute carrier family 13 member 1	0	0	0	0	0	1	0	0	0	0	1	0
ENSG00000081803	CADPS2	calcium dependent secretion activator 2	1	0	0	0	0	0	0	0	1	0	1	0
ENSG00000081818	PCDHB4	protocadherin beta 4	47	49	65	81	53	71	58	54	87	37	41	10
ENSG00000081842	PCDHA6	protocadherin alpha 6	0	1	0	1	1	1	0	0	0	0	0	0
ENSG00000081853	PCDHGA2	protocadherin gamma subfamily A, 2	3	5	3	0	0	2	4	3	1	1	0	1
ENSG00000081870	HSPB11	heat shock protein family B (small) member 11	312	346	229	407	294	309	327	282	417	260	281	241
ENSG00000081913	PHLPP1	PH domain and leucine rich repeat protein phosphatase 1	35	37	29	54	43	28	42	35	43	69	50	40
ENSG00000081923	ATP8B1	ATPase phospholipid transporting 8B1	4	4	6	15	12	7	6	3	2	7	1	3
ENSG00000081985	IL12RB2	interleukin 12 receptor subunit beta 2	0	2	1	2	1	0	2	0	2	1	1	2
ENSG00000082014	SMARCD3	SWI/SNF related, matrix associated, actin dependent regulator of chromatin, subfamily d, member 3	389	407	348	643	501	498	428	349	414	349	346	269
ENSG00000082068	WDR70	WD repeat domain 70	68	70	66	106	59	64	58	61	74	82	74	59
ENSG00000082074	FYB	FYN binding protein	0	0	0	0	0	0	0	1	0	0	0	0
ENSG00000082126	MPP4	membrane palmitoylated protein 4	2	5	4	6	4	5	10	3	6	4	2	2
ENSG00000082146	STRADB	STE20-related kinase adaptor beta	145	144	119	187	136	136	167	148	184	175	145	118
ENSG00000082153	BZW1	basic leucine zipper and W2 domains 1	543	593	462	676	411	388	598	512	613	329	358	240
ENSG00000082175	PGR	progesterone receptor	0	0	0	0	0	0	0	1	1	0	0	0
ENSG00000082196	C1QTNF3	C1q and TNF related 3	14	12	8	18	17	9	4	3	4	15	11	5
ENSG00000082212	ME2	malic enzyme 2	193	186	123	250	167	201	181	181	210	196	204	157
ENSG00000082213	C5orf22	chromosome 5 open reading frame 22	81	125	86	103	93	89	79	76	105	135	98	99
ENSG00000082258	CCNT2	cyclin T2	104	103	78	129	102	79	85	83	96	96	77	64
ENSG00000082269	FAM135A	family with sequence similarity 135 member A	32	32	19	41	27	17	18	17	24	14	11	18
ENSG00000082293	COL19A1	collagen type XIX alpha 1 chain	2	1	4	1	2	0	2	1	2	3	0	0
ENSG00000082397	EPB41L3	erythrocyte membrane protein band 4.1 like 3	1	2	0	1	0	0	4	1	1	4	5	2
ENSG00000082438	COBLL1	cordon-bleu WH2 repeat protein like 1	15	22	16	32	26	36	12	20	13	20	21	13
ENSG00000082458	DLG3	discs large MAGUK scaffold protein 3	21	30	16	34	27	20	25	20	30	14	16	14
ENSG00000082497	SERTAD4	SERTA domain containing 4	42	47	33	55	31	37	35	23	30	20	24	15
ENSG00000082512	TRAF5	TNF receptor associated factor 5	86	108	60	108	70	64	70	53	66	55	42	52
ENSG00000082515	MRPL22	mitochondrial ribosomal protein L22	299	268	218	293	250	270	264	211	285	296	297	261
ENSG00000082516	GEMIN5	gem nuclear organelle associated protein 5	56	66	31	83	51	43	58	30	63	80	52	57
ENSG00000082556	OPRK1	opioid receptor kappa 1	1	0	1	0	0	0	0	0	0	0	0	0
ENSG00000082641	NFE2L1	nuclear factor, erythroid 2 like 1	931	1057	783	1330	1003	1061	759	657	894	614	545	475
ENSG00000082684	SEMA5B	semaphorin 5B	10	7	9	15	10	6	6	9	10	8	21	8
ENSG00000082701	GSK3B	glycogen synthase kinase 3 beta	282	365	224	395	267	260	280	234	324	346	236	205
ENSG00000082781	ITGB5	integrin subunit beta 5	650	657	558	743	495	526	925	727	1004	531	476	438
ENSG00000082805	ERC1	ELKS/RAB6-interacting/CAST family member 1	144	184	144	337	170	207	134	115	184	87	84	79
ENSG00000082898	XPO1	exportin 1	386	441	346	599	400	376	318	340	451	557	404	354
ENSG00000082929	LINC01587	long intergenic non-protein coding RNA 1587	16	23	23	7	2	4	10	11	14	48	42	25
ENSG00000082996	RNF13	ring finger protein 13	122	154	121	203	125	156	97	97	141	112	111	73
ENSG00000083067	TRPM3	transient receptor potential cation channel subfamily M member 3	6	6	10	3	2	0	0	4	9	1	0	0
ENSG00000083093	PALB2	partner and localizer of BRCA2	25	24	18	33	20	22	15	14	19	23	19	18
ENSG00000083097	DOPEY1	dopey family member 1	33	38	32	65	36	31	28	26	39	37	42	25
ENSG00000083099	LYRM2	LYR motif containing 2	243	272	188	303	221	228	204	147	257	197	175	172
ENSG00000083123	BCKDHB	branched chain keto acid dehydrogenase E1 subunit beta	99	141	97	207	146	158	113	94	167	111	105	75
ENSG00000083168	KAT6A	lysine acetyltransferase 6A	282	367	253	419	269	323	285	257	376	361	260	242
ENSG00000083223	ZCCHC6	zinc finger CCHC-type containing 6	49	50	58	85	56	47	47	33	54	66	39	37
ENSG00000083290	ULK2	unc-51 like autophagy activating kinase 2	88	107	71	86	73	69	82	69	84	133	137	129
ENSG00000083307	GRHL2	grainyhead like transcription factor 2	1	1	0	1	0	0	1	1	0	0	0	1
ENSG00000083312	TNPO1	transportin 1	465	629	455	645	492	488	483	479	586	658	583	470
ENSG00000083444	PLOD1	procollagen-lysine,2-oxoglutarate 5-dioxygenase 1	506	565	421	1171	861	842	659	466	666	390	402	360
ENSG00000083454	P2RX5	purinergic receptor P2X 5	5	6	2	9	6	8	0	4	0	6	8	5
ENSG00000083457	ITGAE	integrin subunit alpha E	191	211	154	217	177	201	232	215	242	161	169	133
ENSG00000083520	DIS3	DIS3 homolog, exosome endoribonuclease and 3'-5' exoribonuclease	224	275	212	364	249	215	194	223	258	346	347	292
ENSG00000083535	PIBF1	progesterone immunomodulatory binding factor 1	57	62	55	85	58	46	46	40	63	78	57	45
ENSG00000083544	TDRD3	tudor domain containing 3	62	67	46	95	76	61	79	48	62	107	121	75
ENSG00000083635	NUFIP1	NUFIP1, FMR1 interacting protein 1	25	35	14	52	50	43	16	16	25	60	55	44
ENSG00000083642	PDS5B	PDS5 cohesin associated factor B	53	77	59	96	69	64	78	79	70	81	74	48
ENSG00000083720	OXCT1	3-oxoacid CoA-transferase 1	156	185	166	145	121	124	118	119	183	86	83	71
ENSG00000083750	RRAGB	Ras related GTP binding B	33	31	29	53	40	29	29	20	23	24	19	13
ENSG00000083782	EPYC	epiphycan	0	0	1	0	0	0	0	0	0	0	1	0
ENSG00000083799	CYLD	CYLD lysine 63 deubiquitinase	67	71	62	141	86	113	64	58	73	70	77	47
ENSG00000083807	SLC27A5	solute carrier family 27 member 5	135	141	149	256	155	166	164	108	147	137	139	124
ENSG00000083812	ZNF324	zinc finger protein 324	61	72	49	121	66	79	56	49	86	67	66	53
ENSG00000083817	ZNF416	zinc finger protein 416	24	27	26	51	33	31	30	19	20	20	13	13
ENSG00000083828	ZNF586	zinc finger protein 586	22	11	14	21	14	12	15	21	19	11	9	10
ENSG00000083838	ZNF446	zinc finger protein 446	7	11	9	18	11	14	8	9	15	8	10	4
ENSG00000083844	ZNF264	zinc finger protein 264	80	123	79	159	122	118	95	68	111	92	76	79
ENSG00000083845	RPS5	ribosomal protein S5	9497	9287	7737	12215	9764	9569	9494	6863	9999	11708	11743	9433
ENSG00000083857	FAT1	FAT atypical cadherin 1	78	76	57	87	50	56	110	64	107	257	198	174
ENSG00000083896	YTHDC1	YTH domain containing 1	181	260	163	284	163	186	178	144	232	233	179	175
ENSG00000083937	CHMP2B	charged multivesicular body protein 2B	123	133	128	168	138	147	78	128	141	79	66	55
ENSG00000084070	SMAP2	small ArfGAP2	141	145	110	140	110	108	139	131	144	127	100	83
ENSG00000084072	PPIE	peptidylprolyl isomerase E	228	226	183	310	201	215	213	155	209	277	270	235
ENSG00000084073	ZMPSTE24	zinc metallopeptidase STE24	191	217	143	269	166	201	192	186	244	104	84	72
ENSG00000084090	STARD7	StAR related lipid transfer domain containing 7	379	383	333	452	358	361	446	318	419	357	321	310
ENSG00000084092	NOA1	nitric oxide associated 1	194	184	182	278	165	187	212	154	238	382	378	286
ENSG00000084093	REST	RE1 silencing transcription factor	76	122	76	142	109	154	86	70	111	74	68	84
ENSG00000084110	HAL	histidine ammonia-lyase	0	0	1	2	1	0	0	0	0	0	0	1
ENSG00000084112	SSH1	slingshot protein phosphatase 1	106	145	95	178	113	120	134	94	154	78	86	55
ENSG00000084207	GSTP1	glutathione S-transferase pi 1	3554	3907	2825	4055	3176	3260	3646	2447	3775	2252	2130	1818
ENSG00000084234	APLP2	amyloid beta precursor like protein 2	1941	2187	1820	3539	2331	2456	1729	1662	2029	2050	1857	1774
ENSG00000084444	FAM234B	family with sequence similarity 234 member B	72	112	70	89	50	73	114	86	91	155	139	98
ENSG00000084453	SLCO1A2	solute carrier organic anion transporter family member 1A2	10	10	9	6	6	3	5	5	6	6	6	6
ENSG00000120645	IQSEC3	IQ motif and Sec7 domain 3	3	11	6	9	7	13	14	19	29	14	12	13
ENSG00000084623	EIF3I	eukaryotic translation initiation factor 3 subunit I	1233	1349	1004	1546	1129	1120	1325	1021	1395	1771	1612	1345
ENSG00000084628	NKAIN1	sodium/potassium transporting ATPase interacting 1	134	175	125	107	79	62	126	94	155	88	101	73
ENSG00000084636	COL16A1	collagen type XVI alpha 1 chain	17	30	16	42	27	41	20	18	22	42	40	25
ENSG00000084652	TXLNA	taxilin alpha	262	312	240	463	315	332	273	245	273	250	229	194
ENSG00000084674	APOB	apolipoprotein B	0	0	0	0	0	0	2	0	2	0	0	0
ENSG00000084676	NCOA1	nuclear receptor coactivator 1	164	222	145	323	223	225	166	149	222	188	117	132
ENSG00000084693	AGBL5	ATP/GTP binding protein like 5	327	358	259	463	343	306	308	285	372	438	370	346
ENSG00000084710	EFR3B	EFR3 homolog B	193	173	152	178	118	116	252	160	210	138	109	98
ENSG00000084731	KIF3C	kinesin family member 3C	719	795	602	865	588	576	597	494	679	497	443	342
ENSG00000084733	RAB10	RAB10, member RAS oncogene family	890	968	846	1145	800	790	905	808	991	778	712	577
ENSG00000084734	GCKR	glucokinase regulator	5	1	1	5	1	0	2	1	0	2	7	1
ENSG00000084754	HADHA	hydroxyacyl-CoA dehydrogenase/3-ketoacyl-CoA thiolase/enoyl-CoA hydratase (trifunctional protein), alpha subunit	1180	1228	920	1542	1054	1003	1068	874	1099	1373	1297	1021
ENSG00000084764	MAPRE3	microtubule associated protein RP/EB family member 3	295	402	242	455	327	315	399	317	385	315	291	224
ENSG00000084774	CAD	carbamoyl-phosphate synthetase 2, aspartate transcarbamylase, and dihydroorotase	129	157	140	229	156	178	121	90	144	143	133	139
ENSG00000085063	CD59	CD59 molecule (CD59 blood group)	820	831	658	1996	1535	1564	929	768	1049	438	426	304
ENSG00000085117	CD82	CD82 molecule	101	132	83	375	294	295	117	151	180	59	73	85
ENSG00000085185	BCORL1	BCL6 corepressor like 1	137	205	137	320	196	212	190	110	221	163	118	131
ENSG00000085224	ATRX	ATRX, chromatin remodeler	736	869	616	1247	743	877	565	517	730	490	406	376
ENSG00000085231	AK6	adenylate kinase 6	207	185	182	212	172	178	214	155	199	172	187	150
ENSG00000085265	FCN1	ficolin 1	0	0	0	0	0	0	0	0	1	0	0	0
ENSG00000085274	MYNN	myoneurin	79	68	61	86	73	70	79	66	77	104	92	92
ENSG00000085276	MECOM	MDS1 and EVI1 complex locus	7	5	10	5	6	4	31	31	49	2	2	2
ENSG00000085365	SCAMP1	secretory carrier membrane protein 1	179	205	181	302	221	237	191	196	262	211	216	184
ENSG00000085377	PREP	prolyl endopeptidase	245	281	238	344	298	236	315	279	353	258	222	155
ENSG00000085382	HACE1	HECT domain and ankyrin repeat containing E3 ubiquitin protein ligase 1	65	66	53	109	52	66	82	53	89	96	97	71
ENSG00000085415	SEH1L	SEH1 like nucleoporin	144	171	145	196	121	107	142	101	176	188	153	124
ENSG00000085433	WDR47	WD repeat domain 47	106	134	92	152	97	90	116	112	125	60	74	58
ENSG00000085449	WDFY1	WD repeat and FYVE domain containing 1	26	56	37	59	48	66	64	58	59	62	51	53
ENSG00000085465	OVGP1	oviductal glycoprotein 1	3	5	2	6	1	2	3	2	1	9	6	6
ENSG00000085491	SLC25A24	solute carrier family 25 member 24	210	216	163	209	111	134	158	161	186	92	94	81
ENSG00000085511	MAP3K4	mitogen-activated protein kinase kinase kinase 4	44	51	40	55	47	49	38	39	42	68	58	38
ENSG00000085514	PILRA	paired immunoglobin like type 2 receptor alpha	10	16	6	12	5	15	4	2	8	4	11	9
ENSG00000085552	IGSF9	immunoglobulin superfamily member 9	75	68	58	93	52	58	57	52	79	82	49	44
ENSG00000085563	ABCB1	ATP binding cassette subfamily B member 1	292	359	291	351	286	272	286	252	297	393	307	301
ENSG00000085644	ZNF213	zinc finger protein 213	114	130	95	151	109	117	119	94	129	123	121	97
ENSG00000085662	AKR1B1	aldo-keto reductase family 1 member B	1118	1238	953	1325	1002	1063	1270	985	1386	1033	852	771
ENSG00000085719	CPNE3	copine 3	201	241	199	338	236	238	201	189	251	232	238	184
ENSG00000085721	RRN3	RRN3 homolog, RNA polymerase I transcription factor	101	142	117	177	139	118	106	108	130	140	126	110
ENSG00000085733	CTTN	cortactin	601	802	530	1058	677	744	815	667	645	392	347	308
ENSG00000085741	WNT11	Wnt family member 11	11	9	13	30	19	22	9	12	10	18	37	31
ENSG00000085760	MTIF2	mitochondrial translational initiation factor 2	88	85	62	125	66	95	74	64	80	111	102	89
ENSG00000085788	DDHD2	DDHD domain containing 2	186	195	134	232	141	150	169	134	186	160	170	150
ENSG00000085831	TTC39A	tetratricopeptide repeat domain 39A	45	42	41	87	73	52	34	26	34	14	8	17
ENSG00000085832	EPS15	epidermal growth factor receptor pathway substrate 15	193	240	186	318	215	214	188	169	238	255	205	204
ENSG00000085840	ORC1	origin recognition complex subunit 1	16	26	33	26	16	26	23	29	22	34	31	40
ENSG00000085871	MGST2	microsomal glutathione S-transferase 2	88	95	71	242	171	216	104	87	140	75	68	45
ENSG00000085872	CHERP	calcium homeostasis endoplasmic reticulum protein	77	73	74	127	84	85	83	55	105	117	116	89
ENSG00000085978	ATG16L1	autophagy related 16 like 1	97	108	69	148	72	85	89	62	112	66	78	59
ENSG00000085982	USP40	ubiquitin specific peptidase 40	82	110	96	181	108	118	98	64	120	57	49	52
ENSG00000085998	POMGNT1	protein O-linked mannose N-acetylglucosaminyltransferase 1 (beta 1,2-)	409	453	319	713	516	521	428	307	417	423	413	324
ENSG00000085999	RAD54L	RAD54 like (S. cerevisiae)	55	55	38	48	40	43	60	37	44	73	46	49
ENSG00000086015	MAST2	microtubule associated serine/threonine kinase 2	113	167	114	255	150	171	141	101	153	175	181	135
ENSG00000086061	DNAJA1	DnaJ heat shock protein family (Hsp40) member A1	1524	1629	1242	1913	1320	1354	1335	1148	1510	868	833	640
ENSG00000086062	B4GALT1	beta-1,4-galactosyltransferase 1	96	124	103	287	211	255	139	131	103	110	96	83
ENSG00000086065	CHMP5	charged multivesicular body protein 5	729	757	594	937	681	714	622	597	728	877	844	663
ENSG00000086102	NFX1	nuclear transcription factor, X-box binding 1	140	149	134	237	165	191	124	100	119	134	125	104
ENSG00000086159	AQP6	aquaporin 6	1	8	3	7	3	4	1	2	5	4	2	3
ENSG00000086189	DIMT1	DIM1 dimethyladenosine transferase 1 homolog	275	306	225	427	259	291	247	276	311	369	285	273
ENSG00000086200	IPO11	importin 11	41	46	31	89	72	68	44	29	52	51	56	39
ENSG00000086205	FOLH1	folate hydrolase 1	0	0	0	0	0	0	1	0	1	0	0	0
ENSG00000086232	EIF2AK1	eukaryotic translation initiation factor 2 alpha kinase 1	1180	1189	982	1645	1213	1156	1073	891	1246	1356	1280	996
ENSG00000086288	NME8	NME/NM23 family member 8	0	0	1	2	0	0	1	0	1	1	0	1
ENSG00000086289	EPDR1	ependymin related 1	272	310	235	565	404	379	238	213	277	182	184	130
ENSG00000086300	SNX10	sorting nexin 10	112	80	79	127	62	88	75	73	74	74	71	53
ENSG00000086475	SEPHS1	selenophosphate synthetase 1	287	270	266	371	265	254	309	248	338	302	236	170
ENSG00000086504	MRPL28	mitochondrial ribosomal protein L28	569	613	427	749	563	580	573	438	635	423	396	336
ENSG00000086506	HBQ1	hemoglobin subunit theta 1	113	107	86	178	113	116	137	78	141	101	87	74
ENSG00000086544	ITPKC	inositol-trisphosphate 3-kinase C	61	56	51	96	76	78	48	41	56	43	46	30
ENSG00000086570	FAT2	FAT atypical cadherin 2	2	0	1	1	0	0	0	1	0	2	1	0
ENSG00000086589	RBM22	RNA binding motif protein 22	183	215	133	220	155	170	174	144	193	192	199	163
ENSG00000086598	TMED2	transmembrane p24 trafficking protein 2	645	682	537	805	599	652	720	778	852	704	626	528
ENSG00000086619	ERO1B	endoplasmic reticulum oxidoreductase 1 beta	29	25	28	50	25	30	38	27	46	70	58	46
ENSG00000086666	ZFAND6	zinc finger AN1-type containing 6	340	352	289	418	321	296	377	288	426	425	410	272
ENSG00000086712	TXLNG	taxilin gamma	94	108	67	164	135	125	72	84	100	75	73	70
ENSG00000086717	PPEF1	protein phosphatase with EF-hand domain 1	21	32	19	19	10	9	19	23	32	26	26	21
ENSG00000086730	LAT2	linker for activation of T-cells family member 2	17	21	20	33	12	17	15	14	15	4	12	4
ENSG00000086758	HUWE1	HECT, UBA and WWE domain containing 1, E3 ubiquitin protein ligase	246	313	222	498	357	335	319	240	336	249	231	204
ENSG00000086827	ZW10	zw10 kinetochore protein	48	67	51	80	67	55	79	45	66	56	40	41
ENSG00000086848	ALG9	ALG9, alpha-1,2-mannosyltransferase	155	180	138	208	154	145	196	131	242	171	128	128
ENSG00000086967	MYBPC2	myosin binding protein C, fast type	0	0	0	2	1	0	1	0	0	0	0	0
ENSG00000086991	NOX4	NADPH oxidase 4	25	29	20	28	15	14	20	13	19	5	8	7
ENSG00000087008	ACOX3	acyl-CoA oxidase 3, pristanoyl	57	65	42	67	40	43	35	44	53	76	45	39
ENSG00000087053	MTMR2	myotubularin related protein 2	207	222	178	222	150	147	198	163	225	198	174	136
ENSG00000087074	PPP1R15A	protein phosphatase 1 regulatory subunit 15A	131	127	86	159	115	143	103	93	145	125	122	81
ENSG00000087076	HSD17B14	hydroxysteroid 17-beta dehydrogenase 14	157	144	145	248	165	205	146	103	161	117	150	122
ENSG00000087077	TRIP6	thyroid hormone receptor interactor 6	7	8	10	20	8	14	24	7	14	9	18	10
ENSG00000087085	ACHE	acetylcholinesterase (Cartwright blood group)	138	158	106	162	122	125	229	144	204	101	93	68
ENSG00000087086	FTL	ferritin light chain	10715	11050	8346	21228	16372	16730	11338	8831	12141	15489	14403	11987
ENSG00000087087	SRRT	serrate, RNA effector molecule	258	312	216	357	245	259	282	202	323	204	194	148
ENSG00000087088	BAX	BCL2 associated X, apoptosis regulator	646	689	526	1066	724	813	930	659	896	567	580	405
ENSG00000087095	NLK	nemo like kinase	66	75	77	108	66	91	69	61	83	86	84	58
ENSG00000087111	PIGS	phosphatidylinositol glycan anchor biosynthesis class S	302	326	268	451	335	296	326	239	337	374	297	243
ENSG00000087116	ADAMTS2	ADAM metallopeptidase with thrombospondin type 1 motif 2	2	0	0	5	0	0	7	3	4	19	22	15
ENSG00000087152	ATXN7L3	ataxin 7 like 3	316	400	298	535	364	392	351	290	396	296	285	216
ENSG00000087157	PGS1	phosphatidylglycerophosphate synthase 1	182	209	167	259	196	195	170	157	202	148	169	125
ENSG00000087191	PSMC5	proteasome 26S subunit, ATPase 5	1290	1471	1008	1679	1221	1246	1380	1072	1467	938	893	726
ENSG00000087206	UIMC1	ubiquitin interaction motif containing 1	75	102	66	114	67	63	76	66	94	97	94	85
ENSG00000087237	CETP	cholesteryl ester transfer protein	0	0	1	0	0	0	1	0	0	1	0	0
ENSG00000087245	MMP2	matrix metallopeptidase 2	1173	1459	1034	2172	1533	1685	1394	1155	1737	1767	1539	1324
ENSG00000087250	MT3	metallothionein 3	9	11	4	2	7	5	11	3	9	5	1	0
ENSG00000087253	LPCAT2	lysophosphatidylcholine acyltransferase 2	113	146	83	153	73	109	121	115	129	157	134	111
ENSG00000254489	AL136088.1	NA	9	8	4	1	0	1	24	22	19	29	26	24
ENSG00000087263	OGFOD1	2-oxoglutarate and iron dependent oxygenase domain containing 1	174	235	172	295	195	200	165	173	223	173	181	147
ENSG00000152969	JAKMIP1	janus kinase and microtubule interacting protein 1	37	35	28	21	9	6	95	90	112	113	92	81
ENSG00000087269	NOP14	NOP14 nucleolar protein	54	60	41	66	59	44	58	37	71	42	42	30
ENSG00000087274	ADD1	adducin 1	753	790	660	1176	777	798	733	649	815	535	508	451
ENSG00000087299	L2HGDH	L-2-hydroxyglutarate dehydrogenase	73	74	62	125	75	84	49	56	82	96	103	73
ENSG00000087301	TXNDC16	thioredoxin domain containing 16	107	106	83	115	91	82	86	89	111	124	85	76
ENSG00000087302	C14orf166	chromosome 14 open reading frame 166	1067	1156	849	1231	947	1008	1115	913	1172	1214	1147	839
ENSG00000087303	NID2	nidogen 2	66	84	54	181	110	110	54	59	78	72	62	66
ENSG00000087338	GMCL1	germ cell-less, spermatogenesis associated 1	157	161	132	231	163	174	141	124	149	197	131	159
ENSG00000087365	SF3B2	splicing factor 3b subunit 2	745	790	611	1047	693	749	781	602	784	924	811	702
ENSG00000087448	KLHL42	kelch like family member 42	229	260	189	349	235	268	193	162	224	111	108	90
ENSG00000087460	GNAS	GNAS complex locus	13527	15413	11566	16590	11917	12170	15509	12270	16187	9158	8214	6958
ENSG00000087470	DNM1L	dynamin 1 like	240	295	198	294	223	234	216	202	243	252	230	195
ENSG00000087494	PTHLH	parathyroid hormone like hormone	13	9	8	12	13	13	10	15	18	13	12	8
ENSG00000087495	PHACTR3	phosphatase and actin regulator 3	26	26	10	42	17	17	34	31	41	27	22	20
ENSG00000087502	ERGIC2	ERGIC and golgi 2	120	140	101	169	157	135	135	110	150	131	119	89
ENSG00000087510	TFAP2C	transcription factor AP-2 gamma	0	1	1	0	0	0	1	0	1	0	0	0
ENSG00000087586	AURKA	aurora kinase A	139	137	87	121	76	86	88	83	106	181	123	135
ENSG00000087589	CASS4	Cas scaffolding protein family member 4	0	1	0	1	0	0	1	0	0	0	0	0
ENSG00000087842	PIR	pirin	409	441	337	570	396	409	333	326	418	549	456	378
ENSG00000087884	AAMDC	adipogenesis associated Mth938 domain containing	457	503	381	714	529	562	491	412	542	389	387	320
ENSG00000087903	RFX2	regulatory factor X2	31	41	33	45	37	33	42	30	34	52	41	44
ENSG00000087995	METTL2A	methyltransferase like 2A	167	175	122	207	143	170	176	139	185	223	216	172
ENSG00000088002	SULT2B1	sulfotransferase family 2B member 1	26	19	15	19	19	15	15	13	19	24	23	26
ENSG00000088035	ALG6	ALG6, alpha-1,3-glucosyltransferase	59	72	48	88	57	61	84	43	77	58	39	40
ENSG00000088038	CNOT3	CCR4-NOT transcription complex subunit 3	168	223	169	228	141	167	206	138	214	229	210	155
ENSG00000088053	GP6	glycoprotein VI platelet	1	0	0	1	0	1	0	1	0	1	1	0
ENSG00000088179	PTPN4	protein tyrosine phosphatase, non-receptor type 4	41	49	56	76	54	48	47	29	40	51	56	39
ENSG00000088205	DDX18	DEAD-box helicase 18	387	457	360	627	382	457	296	365	531	420	343	305
ENSG00000088247	KHSRP	KH-type splicing regulatory protein	532	634	497	725	430	501	639	495	659	564	548	415
ENSG00000088256	GNA11	G protein subunit alpha 11	296	298	221	442	257	312	253	231	283	213	165	148
ENSG00000088280	ASAP3	ArfGAP with SH3 domain, ankyrin repeat and PH domain 3	65	100	74	121	94	89	77	51	75	80	81	55
ENSG00000088298	EDEM2	ER degradation enhancing alpha-mannosidase like protein 2	121	134	115	252	166	177	141	126	174	143	153	128
ENSG00000088305	DNMT3B	DNA methyltransferase 3 beta	23	33	13	27	25	28	31	25	25	54	52	40
ENSG00000088320	REM1	RRAD and GEM like GTPase 1	0	0	0	0	0	0	0	0	0	5	4	1
ENSG00000088325	TPX2	TPX2, microtubule nucleation factor	262	264	238	231	155	178	250	175	247	384	315	299
ENSG00000088340	FER1L4	fer-1 like family member 4, pseudogene	75	102	76	226	137	136	72	46	66	83	74	78
ENSG00000088356	PDRG1	p53 and DNA damage regulated 1	162	169	135	162	125	130	173	153	201	163	197	158
ENSG00000088367	EPB41L1	erythrocyte membrane protein band 4.1 like 1	233	282	173	319	220	266	231	181	246	160	185	164
ENSG00000088386	SLC15A1	solute carrier family 15 member 1	0	0	1	0	0	0	0	0	2	2	1	1
ENSG00000088387	DOCK9	dedicator of cytokinesis 9	45	44	30	63	45	32	46	25	38	46	45	37
ENSG00000088448	ANKRD10	ankyrin repeat domain 10	230	330	231	386	262	285	258	225	266	350	299	275
ENSG00000088451	TGDS	TDP-glucose 4,6-dehydratase	81	72	64	115	92	88	81	60	88	124	99	72
ENSG00000088538	DOCK3	dedicator of cytokinesis 3	7	7	4	4	4	7	4	3	6	5	6	7
ENSG00000088543	C3orf18	chromosome 3 open reading frame 18	97	102	104	224	172	159	118	100	126	101	93	73
ENSG00000088682	COQ9	coenzyme Q9	286	337	257	445	333	357	275	239	348	252	232	182
ENSG00000088726	TMEM40	transmembrane protein 40	0	0	0	0	0	0	0	0	1	2	0	1
ENSG00000088727	KIF9	kinesin family member 9	67	70	49	103	70	94	83	64	92	71	58	48
ENSG00000088756	ARHGAP28	Rho GTPase activating protein 28	76	88	72	169	89	119	97	83	109	292	243	232
ENSG00000088766	CRLS1	cardiolipin synthase 1	240	253	223	354	264	240	235	234	299	252	206	188
ENSG00000088808	PPP1R13B	protein phosphatase 1 regulatory subunit 13B	72	74	56	122	88	74	74	37	81	67	62	51
ENSG00000088812	ATRN	attractin	86	122	67	181	116	124	101	109	103	105	100	77
ENSG00000088826	SMOX	spermine oxidase	13	16	16	34	17	22	15	10	17	10	29	21
ENSG00000088827	SIGLEC1	sialic acid binding Ig like lectin 1	0	1	0	0	0	0	0	1	1	1	4	2
ENSG00000088832	FKBP1A	FK506 binding protein 1A	1212	1267	1031	1767	1274	1343	1463	1118	1512	884	851	664
ENSG00000088833	NSFL1C	NSFL1 cofactor	339	403	300	415	308	305	371	289	426	355	356	259
ENSG00000088836	SLC4A11	solute carrier family 4 member 11	24	19	13	38	29	33	19	22	25	27	19	18
ENSG00000088854	C20orf194	chromosome 20 open reading frame 194	89	111	75	144	99	117	79	64	84	64	57	52
ENSG00000088876	ZNF343	zinc finger protein 343	48	81	58	107	55	53	71	50	60	65	61	41
ENSG00000088881	EBF4	early B-cell factor 4	266	314	213	414	311	276	204	184	262	234	214	164
ENSG00000088882	CPXM1	carboxypeptidase X, M14 family member 1	299	305	252	633	483	447	331	278	406	275	251	197
ENSG00000088888	MAVS	mitochondrial antiviral signaling protein	389	483	376	734	506	587	452	320	454	298	282	234
ENSG00000088899	LZTS3	leucine zipper tumor suppressor family member 3	100	118	85	212	122	125	90	87	109	119	107	98
ENSG00000088930	XRN2	5'-3' exoribonuclease 2	486	567	436	666	445	414	391	381	511	526	472	447
ENSG00000088970	KIZ	kizuna centrosomal protein	53	55	40	66	51	50	42	36	58	106	100	69
ENSG00000088986	DYNLL1	dynein light chain LC8-type 1	2933	3161	2523	3620	2795	2843	2967	2340	3356	1749	1612	1325
ENSG00000088992	TESC	tescalcin	18	18	13	19	17	17	11	10	17	11	18	15
ENSG00000089006	SNX5	sorting nexin 5	129	136	110	191	89	126	128	115	148	121	112	121
ENSG00000089009	RPL6	ribosomal protein L6	6414	6618	4866	7556	5954	5848	6480	5005	6898	9606	8742	6875
ENSG00000089012	SIRPG	signal regulatory protein gamma	0	0	0	0	0	0	0	0	1	0	0	0
ENSG00000089022	MAPKAPK5	mitogen-activated protein kinase-activated protein kinase 5	142	179	130	203	123	131	153	121	174	122	131	99
ENSG00000089041	P2RX7	purinergic receptor P2X 7	26	42	27	31	25	22	21	16	30	25	19	30
ENSG00000089048	ESF1	ESF1 nucleolar pre-rRNA processing protein homolog	65	104	69	105	68	63	46	62	87	67	62	47
ENSG00000089050	RBBP9	RB binding protein 9, serine hydrolase	95	86	62	151	113	104	89	77	102	84	66	59
ENSG00000089053	ANAPC5	anaphase promoting complex subunit 5	354	357	320	493	379	396	334	267	389	270	238	243
ENSG00000089057	SLC23A2	solute carrier family 23 member 2	65	72	50	161	88	82	82	58	73	46	45	43
ENSG00000089060	SLC8B1	solute carrier family 8 member B1	47	53	40	83	48	67	41	57	59	68	66	49
ENSG00000089063	TMEM230	transmembrane protein 230	676	771	656	1086	806	840	679	569	688	405	402	337
ENSG00000089091	DZANK1	double zinc ribbon and ankyrin repeat domains 1	19	21	11	25	21	20	15	13	17	14	15	11
ENSG00000089094	KDM2B	lysine demethylase 2B	79	74	62	98	68	80	90	63	75	72	81	58
ENSG00000089101	CFAP61	cilia and flagella associated protein 61	5	2	1	5	5	6	8	3	6	1	1	0
ENSG00000089116	LHX5	LIM homeobox 5	0	1	0	0	0	0	1	0	0	5	5	2
ENSG00000089123	TASP1	taspase 1	39	28	19	33	25	29	19	14	23	28	16	14
ENSG00000089127	OAS1	2'-5'-oligoadenylate synthetase 1	136	135	99	141	95	97	148	137	183	88	82	76
ENSG00000089154	GCN1	GCN1, eIF2 alpha kinase activator homolog	207	268	188	402	292	274	185	141	247	256	215	222
ENSG00000089157	RPLP0	ribosomal protein lateral stalk subunit P0	7255	7763	6043	8779	6644	6700	7837	6671	8892	12807	11998	9670
ENSG00000089159	PXN	paxillin	37	54	43	89	56	62	44	42	34	40	42	31
ENSG00000089163	SIRT4	sirtuin 4	22	22	14	21	20	24	18	14	11	17	18	16
ENSG00000089169	RPH3A	rabphilin 3A	28	30	25	57	25	44	75	46	84	35	36	27
ENSG00000089177	KIF16B	kinesin family member 16B	34	51	26	85	48	64	43	32	47	38	33	26
ENSG00000089195	TRMT6	tRNA methyltransferase 6	88	108	86	186	118	147	93	86	143	88	67	82
ENSG00000089199	CHGB	chromogranin B	981	1054	802	5319	3872	3990	2087	1730	2237	602	585	440
ENSG00000089220	PEBP1	phosphatidylethanolamine binding protein 1	1107	1294	969	1788	1277	1352	1173	1089	1508	1013	911	743
ENSG00000089234	BRAP	BRCA1 associated protein	78	67	59	123	68	83	62	58	80	84	93	73
ENSG00000089248	ERP29	endoplasmic reticulum protein 29	944	1042	835	1938	1374	1489	987	802	1164	1024	937	791
ENSG00000089250	NOS1	nitric oxide synthase 1	1	2	2	0	0	1	2	1	3	2	1	3
ENSG00000089280	FUS	FUS RNA binding protein	1514	1884	1410	1678	1151	1294	1723	1333	1983	770	680	595
ENSG00000089289	IGBP1	immunoglobulin binding protein 1	421	403	332	572	480	448	419	350	470	664	605	477
ENSG00000089327	FXYD5	FXYD domain containing ion transport regulator 5	8	4	7	6	1	2	13	9	15	38	31	30
ENSG00000089335	ZNF302	zinc finger protein 302	114	140	100	183	129	128	111	107	155	138	105	97
ENSG00000089351	GRAMD1A	GRAM domain containing 1A	352	454	341	604	419	408	375	307	449	525	498	419
ENSG00000089356	FXYD3	FXYD domain containing ion transport regulator 3	0	0	0	0	0	0	0	0	0	1	0	0
ENSG00000089472	HEPH	hephaestin	0	0	0	0	0	0	2	0	0	2	5	0
ENSG00000089486	CDIP1	cell death inducing p53 target 1	330	425	289	563	374	365	329	271	354	268	290	250
ENSG00000089505	CMTM1	CKLF like MARVEL transmembrane domain containing 1	6	3	6	14	7	7	11	9	10	5	4	3
ENSG00000089558	KCNH4	potassium voltage-gated channel subfamily H member 4	2	2	3	6	1	5	4	4	0	4	5	11
ENSG00000196092	PAX5	paired box 5	8	10	7	8	4	5	15	20	34	31	25	32
ENSG00000089639	GMIP	GEM interacting protein	86	84	68	86	72	58	89	70	97	67	58	53
ENSG00000089682	RBM41	RNA binding motif protein 41	24	27	17	41	22	26	13	18	29	30	20	16
ENSG00000089685	BIRC5	baculoviral IAP repeat containing 5	537	569	488	505	351	372	584	426	604	792	772	594
ENSG00000089692	LAG3	lymphocyte activating 3	6	12	7	19	9	4	9	6	7	8	7	10
ENSG00000174607	UGT8	UDP glycosyltransferase 8	6	9	5	2	1	2	17	17	20	8	10	11
ENSG00000089723	OTUB2	OTU deubiquitinase, ubiquitin aldehyde binding 2	6	14	9	7	8	5	8	11	11	7	7	6
ENSG00000089737	DDX24	DEAD-box helicase 24	298	360	291	466	304	342	347	303	364	313	272	228
ENSG00000089775	ZBTB25	zinc finger and BTB domain containing 25	64	90	63	102	81	88	70	69	88	87	65	68
ENSG00000089818	NECAP1	NECAP endocytosis associated 1	133	149	113	169	134	129	131	117	159	141	136	86
ENSG00000089820	ARHGAP4	Rho GTPase activating protein 4	33	62	31	104	52	50	42	32	44	69	52	64
ENSG00000089847	ANKRD24	ankyrin repeat domain 24	9	25	11	21	27	17	18	7	16	26	28	33
ENSG00000089876	DHX32	DEAH-box helicase 32 (putative)	81	100	62	131	98	87	72	80	94	81	80	50
ENSG00000089902	RCOR1	REST corepressor 1	114	112	76	64	66	49	111	80	109	95	85	91
ENSG00000089916	GPATCH2L	G-patch domain containing 2 like	85	104	78	150	77	95	72	63	92	130	91	86
ENSG00000090006	LTBP4	latent transforming growth factor beta binding protein 4	198	255	169	302	231	247	147	121	157	236	227	217
ENSG00000090013	BLVRB	biliverdin reductase B	559	540	399	734	544	546	564	449	620	638	625	523
ENSG00000090020	SLC9A1	solute carrier family 9 member A1	33	52	32	70	43	49	39	34	61	29	21	14
ENSG00000090054	SPTLC1	serine palmitoyltransferase long chain base subunit 1	37	26	23	33	23	19	21	27	38	33	24	21
ENSG00000090060	PAPOLA	poly(A) polymerase alpha	578	634	518	735	521	577	595	501	582	671	646	505
ENSG00000090061	CCNK	cyclin K	2	2	1	3	0	0	1	3	0	3	1	2
ENSG00000090097	PCBP4	poly(rC) binding protein 4	659	709	576	886	575	605	701	449	600	345	312	251
ENSG00000090238	YPEL3	yippee like 3	359	386	307	575	379	414	322	208	373	532	504	407
ENSG00000090263	MRPS33	mitochondrial ribosomal protein S33	663	716	572	865	610	659	657	504	763	701	660	524
ENSG00000090266	NDUFB2	NADH:ubiquinone oxidoreductase subunit B2	2009	2149	1565	2301	1706	1837	1843	1562	2153	1180	1126	911
ENSG00000090273	NUDC	nuclear distribution C, dynein complex regulator	547	610	443	768	554	591	553	466	586	545	446	361
ENSG00000090316	MAEA	macrophage erythroblast attacher	288	284	232	367	269	273	260	216	289	135	152	132
ENSG00000090339	ICAM1	intercellular adhesion molecule 1	4	6	1	15	7	6	4	4	7	6	9	5
ENSG00000090372	STRN4	striatin 4	400	441	362	580	379	431	415	285	450	358	356	285
ENSG00000090376	IRAK3	interleukin 1 receptor associated kinase 3	0	0	0	0	0	0	0	0	0	0	0	1
ENSG00000090402	SI	sucrase-isomaltase	0	1	0	0	0	0	0	0	0	0	0	0
ENSG00000090432	MUL1	mitochondrial E3 ubiquitin protein ligase 1	234	236	192	274	239	238	231	152	261	160	180	121
ENSG00000090447	TFAP4	transcription factor AP-4	52	53	51	64	59	54	60	42	59	78	96	72
ENSG00000090470	PDCD7	programmed cell death 7	144	189	147	199	133	139	105	117	174	167	135	137
ENSG00000090487	SPG21	SPG21, maspardin	357	342	255	511	329	337	349	281	369	352	324	296
ENSG00000090520	DNAJB11	DnaJ heat shock protein family (Hsp40) member B11	424	456	349	404	278	312	535	390	579	329	290	231
ENSG00000090530	P3H2	prolyl 3-hydroxylase 2	2	0	0	0	0	0	5	0	4	15	9	15
ENSG00000090534	THPO	thrombopoietin	3	5	7	1	2	2	5	1	1	2	5	4
ENSG00000090539	CHRD	chordin	19	23	18	26	15	13	22	12	11	24	35	27
ENSG00000090554	FLT3LG	fms related tyrosine kinase 3 ligand	1	1	0	1	0	3	0	1	1	0	0	2
ENSG00000090565	RAB11FIP3	RAB11 family interacting protein 3	166	184	135	281	195	186	169	116	172	132	128	95
ENSG00000090581	GNPTG	N-acetylglucosamine-1-phosphate transferase gamma subunit	20	32	23	77	46	48	31	25	32	15	32	13
ENSG00000090612	ZNF268	zinc finger protein 268	107	130	84	156	116	122	82	73	90	59	58	52
ENSG00000090615	GOLGA3	golgin A3	186	279	176	355	256	259	216	170	222	240	201	190
ENSG00000090621	PABPC4	poly(A) binding protein cytoplasmic 4	436	547	451	704	462	498	441	461	590	565	470	433
ENSG00000090659	CD209	CD209 molecule	1	3	1	2	0	0	0	0	2	0	0	2
ENSG00000090661	CERS4	ceramide synthase 4	133	128	121	314	200	227	108	74	123	103	103	81
ENSG00000090674	MCOLN1	mucolipin 1	51	45	41	88	42	59	64	44	56	22	27	16
ENSG00000090686	USP48	ubiquitin specific peptidase 48	196	251	164	256	162	200	175	204	291	166	155	145
ENSG00000090776	EFNB1	ephrin B1	64	79	66	118	70	74	76	63	95	87	79	94
ENSG00000090857	PDPR	pyruvate dehydrogenase phosphatase regulatory subunit	108	180	109	245	181	185	113	92	128	140	123	122
ENSG00000090861	AARS	alanyl-tRNA synthetase	392	515	345	571	371	398	391	301	373	387	378	362
ENSG00000090863	GLG1	golgi glycoprotein 1	457	542	402	933	577	594	470	447	591	486	399	390
ENSG00000090889	KIF4A	kinesin family member 4A	144	147	136	129	80	85	129	97	169	199	220	161
ENSG00000090905	TNRC6A	trinucleotide repeat containing 6A	259	341	229	393	231	256	165	203	313	175	127	146
ENSG00000090924	PLEKHG2	pleckstrin homology and RhoGEF domain containing G2	113	190	137	227	157	144	173	116	170	82	119	79
ENSG00000090932	DLL3	delta like canonical Notch ligand 3	305	325	226	438	301	295	301	252	340	227	225	198
ENSG00000090971	NAT14	N-acetyltransferase 14 (putative)	555	550	406	728	580	590	641	446	643	443	414	337
ENSG00000090975	PITPNM2	phosphatidylinositol transfer protein membrane associated 2	8	7	5	25	15	17	7	2	8	2	4	8
ENSG00000090989	EXOC1	exocyst complex component 1	141	182	150	224	154	162	158	122	159	194	156	118
ENSG00000091009	RBM27	RNA binding motif protein 27	99	94	73	113	93	105	98	99	112	90	88	103
ENSG00000091039	OSBPL8	oxysterol binding protein like 8	265	291	242	279	224	249	217	186	266	265	218	200
ENSG00000091073	DTX2	deltex E3 ubiquitin ligase 2	88	86	55	93	66	76	81	65	89	79	61	65
ENSG00000091106	NLRC4	NLR family CARD domain containing 4	0	0	3	5	2	0	0	3	1	1	3	0
ENSG00000091127	PUS7	pseudouridylate synthase 7 (putative)	73	76	55	92	46	52	58	56	71	51	62	46
ENSG00000091128	LAMB4	laminin subunit beta 4	2	3	3	5	0	2	0	1	1	1	1	2
ENSG00000091129	NRCAM	neuronal cell adhesion molecule	248	301	204	242	151	106	321	268	308	339	323	305
ENSG00000091136	LAMB1	laminin subunit beta 1	649	753	550	1204	794	816	599	487	662	797	642	578
ENSG00000091137	SLC26A4	solute carrier family 26 member 4	0	0	0	1	1	0	0	0	0	0	1	2
ENSG00000091138	SLC26A3	solute carrier family 26 member 3	0	1	0	0	0	0	1	0	0	1	0	0
ENSG00000091140	DLD	dihydrolipoamide dehydrogenase	436	413	371	529	382	391	387	369	441	335	349	260
ENSG00000091157	WDR7	WD repeat domain 7	51	49	41	76	46	35	56	41	53	42	31	39
ENSG00000091164	TXNL1	thioredoxin like 1	680	739	584	918	658	673	689	612	797	957	837	752
ENSG00000091181	IL5RA	interleukin 5 receptor subunit alpha	1	1	0	1	1	0	1	2	2	0	1	1
ENSG00000091262	ABCC6	ATP binding cassette subfamily C member 6	23	29	14	41	28	27	18	9	32	18	5	8
ENSG00000091317	CMTM6	CKLF like MARVEL transmembrane domain containing 6	564	652	461	848	543	602	534	614	812	714	568	520
ENSG00000091409	ITGA6	integrin subunit alpha 6	33	37	26	48	24	32	20	26	26	33	25	22
ENSG00000091428	RAPGEF4	Rap guanine nucleotide exchange factor 4	60	72	49	141	97	103	73	69	74	36	40	26
ENSG00000091436	MAP3K20	mitogen-activated protein kinase kinase kinase 20	127	149	118	189	114	146	126	132	160	110	118	102
ENSG00000091482	SMPX	small muscle protein, X-linked	0	2	0	0	3	1	0	0	1	0	0	1
ENSG00000091483	FH	fumarate hydratase	243	287	228	374	195	253	271	265	306	339	280	258
ENSG00000091490	SEL1L3	SEL1L family member 3	37	28	28	79	39	47	111	89	113	64	50	39
ENSG00000091513	TF	transferrin	1	1	1	2	1	1	0	1	1	2	3	0
ENSG00000091527	CDV3	CDV3 homolog	272	321	246	402	255	281	336	232	315	428	367	290
ENSG00000091536	MYO15A	myosin XVA	4	5	2	13	1	2	2	4	3	7	0	11
ENSG00000091542	ALKBH5	alkB homolog 5, RNA demethylase	438	508	376	600	396	441	457	395	495	484	464	386
ENSG00000091583	APOH	apolipoprotein H	13	12	19	59	45	31	24	18	15	12	12	11
ENSG00000091592	NLRP1	NLR family pyrin domain containing 1	525	526	444	805	566	550	588	455	614	453	377	299
ENSG00000091622	PITPNM3	PITPNM family member 3	2	2	1	3	0	3	3	0	1	2	2	2
ENSG00000091640	SPAG7	sperm associated antigen 7	336	353	268	401	266	276	302	216	321	293	289	259
ENSG00000091651	ORC6	origin recognition complex subunit 6	116	139	98	104	77	102	152	100	141	99	93	81
ENSG00000091656	ZFHX4	zinc finger homeobox 4	169	266	189	329	213	250	178	202	254	109	74	117
ENSG00000091664	SLC17A6	solute carrier family 17 member 6	0	0	0	0	0	1	0	0	0	0	0	0
ENSG00000091704	CPA1	carboxypeptidase A1	2	10	4	10	5	12	6	1	3	1	2	2
ENSG00000091732	ZC3HC1	zinc finger C3HC-type containing 1	195	235	192	250	185	151	171	134	193	141	119	115
ENSG00000091831	ESR1	estrogen receptor 1	0	0	0	1	0	0	0	0	0	0	0	0
ENSG00000091844	RGS17	regulator of G protein signaling 17	58	73	59	97	64	54	70	60	91	91	75	60
ENSG00000091879	ANGPT2	angiopoietin 2	17	16	14	14	4	5	18	12	20	4	6	5
ENSG00000091947	TMEM101	transmembrane protein 101	219	239	178	277	212	221	164	138	202	196	167	158
ENSG00000091972	CD200	CD200 molecule	69	90	57	14	14	21	105	93	87	55	53	38
ENSG00000091986	CCDC80	coiled-coil domain containing 80	114	130	94	405	255	282	117	141	189	63	60	68
ENSG00000092010	PSME1	proteasome activator subunit 1	920	927	715	1902	1385	1437	1022	798	1038	1088	1088	930
ENSG00000092020	PPP2R3C	protein phosphatase 2 regulatory subunit B''gamma	223	276	214	225	151	165	214	171	228	293	274	252
ENSG00000092036	HAUS4	HAUS augmin like complex subunit 4	19	15	18	26	17	10	15	13	16	29	32	19
ENSG00000092051	JPH4	junctophilin 4	265	323	254	442	322	325	297	196	299	230	206	181
ENSG00000092054	MYH7	myosin heavy chain 7	0	0	0	0	1	0	0	0	0	0	0	0
ENSG00000092068	SLC7A8	solute carrier family 7 member 8	1	1	0	0	0	1	0	0	1	1	0	0
ENSG00000092094	OSGEP	O-sialoglycoprotein endopeptidase	120	144	96	155	111	115	90	75	122	57	43	45
ENSG00000092096	SLC22A17	solute carrier family 22 member 17	1004	1153	816	1472	995	993	1470	1155	1601	1219	1135	912
ENSG00000092098	RNF31	ring finger protein 31	1	1	1	2	2	3	2	0	4	1	0	2
ENSG00000092108	SCFD1	sec1 family domain containing 1	196	203	145	269	220	188	168	148	217	246	207	183
ENSG00000092140	G2E3	G2/M-phase specific E3 ubiquitin protein ligase	121	154	111	140	82	99	102	107	135	168	180	146
ENSG00000092148	HECTD1	HECT domain E3 ubiquitin protein ligase 1	170	176	118	276	152	181	168	150	190	145	127	135
ENSG00000092199	HNRNPC	heterogeneous nuclear ribonucleoprotein C (C1/C2)	1300	1375	1039	1642	1223	1268	1236	1112	1481	2083	1831	1555
ENSG00000092200	RPGRIP1	retinitis pigmentosa GTPase regulator interacting protein 1	4	5	2	3	5	3	2	0	2	0	0	1
ENSG00000092201	SUPT16H	SPT16 homolog, facilitates chromatin remodeling subunit	403	436	333	601	411	404	329	337	453	396	365	331
ENSG00000092203	TOX4	TOX high mobility group box family member 4	295	260	240	404	303	293	288	244	268	277	274	233
ENSG00000092208	GEMIN2	gem nuclear organelle associated protein 2	44	52	35	52	29	37	41	37	41	54	50	36
ENSG00000092295	TGM1	transglutaminase 1	4	4	7	11	4	2	1	0	1	0	3	3
ENSG00000092330	TINF2	TERF1 interacting nuclear factor 2	300	303	204	384	293	347	244	200	283	227	212	176
ENSG00000092421	SEMA6A	semaphorin 6A	132	167	103	260	163	204	131	126	204	104	92	106
ENSG00000092439	TRPM7	transient receptor potential cation channel subfamily M member 7	35	43	40	51	47	44	54	32	49	31	28	24
ENSG00000092445	TYRO3	TYRO3 protein tyrosine kinase	126	147	106	186	93	108	119	96	128	96	100	87
ENSG00000092470	WDR76	WD repeat domain 76	101	118	93	140	92	106	122	115	107	86	89	80
ENSG00000092531	SNAP23	synaptosome associated protein 23	76	81	82	163	117	114	80	47	71	59	45	44
ENSG00000092621	PHGDH	phosphoglycerate dehydrogenase	682	780	579	986	666	670	843	639	879	603	590	494
ENSG00000092758	COL9A3	collagen type IX alpha 3 chain	114	124	95	78	38	38	119	99	134	168	153	159
ENSG00000092820	EZR	ezrin	384	456	364	672	446	449	430	380	495	370	311	283
ENSG00000092841	MYL6	myosin light chain 6	6289	6133	4743	8154	6155	6698	6103	5259	7374	3733	3618	2952
ENSG00000092847	AGO1	argonaute 1, RISC catalytic component	183	185	149	319	206	248	163	129	203	138	119	114
ENSG00000092850	TEKT2	tektin 2	6	1	1	2	2	3	3	2	2	3	4	2
ENSG00000092853	CLSPN	claspin	33	33	30	42	32	52	10	28	44	9	8	8
ENSG00000092871	RFFL	ring finger and FYVE like domain containing E3 ubiquitin protein ligase	121	155	116	213	132	134	135	95	162	151	114	111
ENSG00000092929	UNC13D	unc-13 homolog D	15	12	11	32	11	16	7	11	10	11	12	6
ENSG00000092931	MFSD11	major facilitator superfamily domain containing 11	246	278	200	303	206	200	189	188	238	206	181	173
ENSG00000092964	DPYSL2	dihydropyrimidinase like 2	1005	1194	923	890	572	616	1025	931	1148	754	620	579
ENSG00000092969	TGFB2	transforming growth factor beta 2	10	13	11	13	17	13	12	13	8	7	3	2
ENSG00000092978	GPATCH2	G-patch domain containing 2	82	76	51	96	62	75	57	68	82	104	83	53
ENSG00000093000	NUP50	nucleoporin 50	74	113	93	151	74	104	121	119	152	105	89	78
ENSG00000093009	CDC45	cell division cycle 45	54	68	54	72	60	62	81	59	82	44	56	24
ENSG00000093010	COMT	catechol-O-methyltransferase	636	689	550	1030	762	752	617	456	632	283	277	191
ENSG00000093072	ADA2	adenosine deaminase 2	7	9	10	10	3	3	10	3	5	17	13	14
ENSG00000093144	ECHDC1	ethylmalonyl-CoA decarboxylase 1	235	266	190	239	188	189	215	165	244	165	165	144
ENSG00000093167	LRRFIP2	LRR binding FLII interacting protein 2	198	197	146	275	165	171	188	128	183	225	204	163
ENSG00000093183	SEC22C	SEC22 homolog C, vesicle trafficking protein	189	231	197	244	154	174	177	161	206	181	123	137
ENSG00000093217	XYLB	xylulokinase	12	9	5	10	12	8	4	3	5	2	2	2
ENSG00000094631	HDAC6	histone deacetylase 6	158	156	112	199	119	135	129	82	101	141	141	112
ENSG00000094755	GABRP	gamma-aminobutyric acid type A receptor pi subunit	13	12	6	2	2	5	11	18	13	5	9	4
ENSG00000094804	CDC6	cell division cycle 6	106	115	88	117	89	91	116	103	138	86	97	78
ENSG00000094841	UPRT	uracil phosphoribosyltransferase homolog	72	92	77	107	96	88	78	50	79	39	47	32
ENSG00000094880	CDC23	cell division cycle 23	172	216	149	162	124	119	166	118	173	205	169	158
ENSG00000094914	AAAS	aladin WD repeat nucleoporin	274	273	229	320	226	233	276	210	314	267	285	206
ENSG00000094916	CBX5	chromobox 5	640	764	568	982	716	672	778	653	756	618	508	492
ENSG00000094963	FMO2	flavin containing monooxygenase 2	0	0	0	0	0	0	0	1	0	0	0	0
ENSG00000094975	SUCO	SUN domain containing ossification factor	166	181	147	250	159	176	163	148	186	250	204	195
ENSG00000095002	MSH2	mutS homolog 2	298	348	249	377	264	253	319	265	358	330	291	247
ENSG00000095015	MAP3K1	mitogen-activated protein kinase kinase kinase 1	68	81	59	81	66	43	102	74	86	64	62	45
ENSG00000095059	DHPS	deoxyhypusine synthase	759	801	623	964	703	728	806	583	856	1099	1129	888
ENSG00000095066	HOOK2	hook microtubule tethering protein 2	119	141	114	253	140	166	119	95	152	149	104	89
ENSG00000095139	ARCN1	archain 1	408	468	372	701	439	452	449	382	469	493	451	391
ENSG00000095203	EPB41L4B	erythrocyte membrane protein band 4.1 like 4B	31	52	44	97	50	55	33	50	48	34	27	15
ENSG00000095209	TMEM38B	transmembrane protein 38B	90	87	62	107	85	83	82	81	99	158	136	122
ENSG00000095261	PSMD5	proteasome 26S subunit, non-ATPase 5	100	99	95	144	101	127	97	83	109	120	117	102
ENSG00000095303	PTGS1	prostaglandin-endoperoxide synthase 1	30	38	23	162	100	126	55	37	58	28	28	22
ENSG00000095319	NUP188	nucleoporin 188	133	149	103	222	123	140	113	97	153	124	103	90
ENSG00000095321	CRAT	carnitine O-acetyltransferase	135	180	112	249	181	198	150	116	147	194	177	120
ENSG00000095370	SH2D3C	SH2 domain containing 3C	79	90	66	105	78	92	68	74	76	127	116	89
ENSG00000095380	NANS	N-acetylneuraminate synthase	238	245	170	263	172	198	239	151	243	200	178	144
ENSG00000095383	TBC1D2	TBC1 domain family member 2	25	20	19	35	27	23	28	18	25	26	24	20
ENSG00000095397	WHRN	whirlin	21	25	18	34	26	25	18	18	31	44	25	28
ENSG00000095464	PDE6C	phosphodiesterase 6C	2	3	0	0	1	0	0	2	0	3	0	1
ENSG00000095485	CWF19L1	CWF19 like 1, cell cycle control (S. pombe)	74	75	57	104	79	78	73	61	78	74	81	57
ENSG00000095539	SEMA4G	semaphorin 4G	12	21	14	23	18	14	13	13	19	17	18	19
ENSG00000095564	BTAF1	B-TFIID TATA-box binding protein associated factor 1	70	86	37	78	53	60	48	47	69	69	76	63
ENSG00000095574	IKZF5	IKAROS family zinc finger 5	45	62	40	58	41	42	58	43	49	54	55	44
ENSG00000095585	BLNK	B-cell linker	0	2	1	1	0	0	0	0	0	0	1	0
ENSG00000095587	TLL2	tolloid like 2	12	16	12	19	19	11	10	17	21	10	7	6
ENSG00000095596	CYP26A1	cytochrome P450 family 26 subfamily A member 1	3706	4175	3039	8807	6119	6498	2093	1830	2547	1634	1446	1210
ENSG00000095627	TDRD1	tudor domain containing 1	0	0	1	0	0	0	0	0	0	0	0	0
ENSG00000095637	SORBS1	sorbin and SH3 domain containing 1	16	21	12	32	16	15	17	19	26	37	34	30
ENSG00000095713	CRTAC1	cartilage acidic protein 1	38	42	19	35	18	23	63	28	42	89	84	65
ENSG00000095739	BAMBI	BMP and activin membrane bound inhibitor	149	170	152	102	54	73	209	172	213	127	130	114
ENSG00000095752	IL11	interleukin 11	47	64	33	47	33	53	33	27	38	46	43	38
ENSG00000095777	MYO3A	myosin IIIA	0	0	0	0	0	0	0	0	0	0	1	0
ENSG00000095787	WAC	WW domain containing adaptor with coiled-coil	576	623	500	808	508	573	503	443	611	577	489	401
ENSG00000095794	CREM	cAMP responsive element modulator	695	678	484	740	566	540	749	629	886	461	444	349
ENSG00000095906	NUBP2	nucleotide binding protein 2	399	376	301	505	381	382	385	320	455	388	335	309
ENSG00000095932	SMIM24	small integral membrane protein 24	18	23	28	11	7	7	18	10	19	22	25	25
ENSG00000095951	HIVEP1	human immunodeficiency virus type I enhancer binding protein 1	21	20	22	39	26	38	14	14	29	30	16	16
ENSG00000096060	FKBP5	FK506 binding protein 5	135	170	97	147	80	91	130	98	118	133	96	86
ENSG00000096063	SRPK1	SRSF protein kinase 1	199	213	168	237	157	182	214	151	228	259	254	209
ENSG00000096070	BRPF3	bromodomain and PHD finger containing 3	55	80	46	88	37	75	41	47	50	43	49	32
ENSG00000096080	MRPS18A	mitochondrial ribosomal protein S18A	4	1	0	1	0	0	1	1	1	0	1	1
ENSG00000096088	PGC	progastricsin	0	1	0	1	0	0	0	0	0	1	1	0
ENSG00000096092	TMEM14A	transmembrane protein 14A	461	533	394	598	381	428	590	496	617	393	335	311
ENSG00000096093	EFHC1	EF-hand domain containing 1	58	73	58	131	80	95	65	57	80	85	65	63
ENSG00000096264	NCR2	natural cytotoxicity triggering receptor 2	1	0	0	0	0	0	0	0	0	0	1	0
ENSG00000096384	HSP90AB1	heat shock protein 90 alpha family class B member 1	4263	4744	3565	5897	3827	4180	4699	3966	5138	5578	4994	4163
ENSG00000096401	CDC5L	cell division cycle 5 like	240	283	235	369	274	241	208	204	298	232	202	170
ENSG00000096433	ITPR3	inositol 1,4,5-trisphosphate receptor type 3	20	24	21	57	30	31	29	23	26	49	41	48
ENSG00000096654	ZNF184	zinc finger protein 184	56	58	43	65	39	37	42	42	30	40	41	33
ENSG00000096696	DSP	desmoplakin	1	0	0	0	0	0	0	0	0	0	0	0
ENSG00000096717	SIRT1	sirtuin 1	104	112	75	113	61	103	66	63	78	88	83	75
ENSG00000096746	HNRNPH3	heterogeneous nuclear ribonucleoprotein H3	815	896	644	889	610	684	858	672	917	860	749	660
ENSG00000096872	IFT74	intraflagellar transport 74	56	52	54	104	54	71	39	40	66	79	53	63
ENSG00000096968	JAK2	Janus kinase 2	14	13	14	14	9	7	14	7	13	14	8	9
ENSG00000096996	IL12RB1	interleukin 12 receptor subunit beta 1	1	1	0	0	0	0	0	0	0	0	0	0
ENSG00000097007	ABL1	ABL proto-oncogene 1, non-receptor tyrosine kinase	389	498	371	609	398	444	423	337	498	282	289	221
[truncated: 30,740 more rows]
