# Supplementary material for: Loss of the Chr16p11.2 ASD candidate gene QPRT leads to aberrant neuronal differentiation in the SH-SY5Y neuronal cell model
Source: Mol Autism. 2018 Nov 6;9:56. doi: 10.1186/s13229-018-0239-z (PMC6220561; doi:10.1186/s13229-018-0239-z)
Supplement: Supplementary file 3 — Results from GO term enrichment analysis. (XLSX 36 kb) [file 13229_2018_239_MOESM3_ESM.xlsx]

## Sheet: GOResults_diff_reg_genes
GO.ID	Term	Annotated	Significant	Expected	weight01	Genes	Set
GO:0050803	regulation of synapse structure or activ...	206	8	3.2	0.00023	CBLN1 RAB3A CUX2 PPT1 APP LINGO2 MYO6 ETV5	de-reg
GO:0014047	glutamate secretion	41	5	0.64	0.00041	RAB3A GLS SLC38A2 CCK MYO6	de-reg
GO:0007420	brain development	627	23	9.75	0.00075	BAK1 PLXNA2 PCM1 GNAO1 CBLN1 CDK6 ARL6 UCHL5 KCNC1 PPT1 COX17 APP NME7 ECE2 VLDLR CTNNB1 KCNK3 BPTF DAB1 CNTNAP2 SCRIB PCDH18 PAX5	de-reg
GO:0043552	positive regulation of phosphatidylinosi...	27	4	0.42	0.00076	TGFB1 PDGFRB VAV3 LYN	de-reg
GO:0007269	neurotransmitter secretion	148	10	2.3	0.00089	SYT13 RIMS4 RAB3A GLS PPT1 SLC38A2 KCNMB4 SLC18A2 SCRIB ABAT	de-reg
GO:0043114	regulation of vascular permeability	29	4	0.45	0.001	TGFB1 VEGFA NPPB PTP4A3	de-reg
GO:1903053	regulation of extracellular matrix organ...	29	4	0.45	0.001	TGFB1 TCF15 DDR2 DDR1	de-reg
GO:0014003	oligodendrocyte development	32	4	0.5	0.00146	TGFB1 WASF3 KCNQ3 LYN	de-reg
GO:0002576	platelet degranulation	80	6	1.24	0.00153	TGFB1 VEGFA TUBA4A APP DMTN LYN	de-reg
GO:0035108	limb morphogenesis	139	7	2.16	0.00209	BAK1 SEMA3C PLXNA2 HOXD11 ALX3 CTNNB1 HOXC10	de-reg
GO:0051336	regulation of hydrolase activity	1127	26	17.53	0.00219	BAK1 PPP2R2C RGS11 GNAO1 RAB3A OAS3 VEGFA PDGFRB UCHL5 IQSEC3 PPT1 VAV3 RAPGEF5 RDX ARHGAP20 APP ATP1B1 STXBP5L PTPRN2 RALGDS RACGAP1 WDR43 SCRIB CCK AGAP4 ARHGEF28	de-reg
GO:0045930	negative regulation of mitotic cell cycl...	228	7	3.55	0.00345	BRINP1 TGFB1 RPA2 PSMA5 MAD2L1 CTNNB1 SCRIB	de-reg
GO:0050768	negative regulation of neurogenesis	193	6	3	0.004	PCM1 TGFB1 OLFM1 APP CTNNB1 DAB1	de-reg
GO:0038084	vascular endothelial growth factor signa...	21	3	0.33	0.00402	VEGFA PDGFRB PTP4A3	de-reg
GO:0045860	positive regulation of protein kinase ac...	561	10	8.73	0.00415	BAK1 TGFB1 VEGFA PDGFRB DUSP6 PSMA5 VLDLR DDR2 DAB1 CCNL2	de-reg
GO:0016358	dendrite development	176	7	2.74	0.0045	CUX2 APP VLDLR SHANK1 SDC2 DAB1 MYO6	de-reg
GO:0007626	locomotory behavior	179	9	2.78	0.00451	GNAO1 PPT1 APP SLC18A2 DAB1 ABAT ESPN MYO6 ETV5	de-reg
GO:0014009	glial cell proliferation	22	3	0.34	0.0046	PRKCI ETV5 LYN	de-reg
GO:0060444	branching involved in mammary gland duct...	22	3	0.34	0.0046	TGFB1 DDR1 ETV5	de-reg
GO:0031100	organ regeneration	71	5	1.1	0.00493	BAK1 PTPRU TGFB1 LPIN1 DDR1	de-reg
GO:0043583	ear development	190	8	2.96	0.00617	TGFB1 PDGFRB TCF15 GABRB3 KCNK3 SCRIB MYO6 DDR1	de-reg
GO:0046034	ATP metabolic process	193	8	3	0.00644	TGFB1 ATP1B1 ATP6V1B2 PID1 AK5 HK1 ATP5L COX5A	de-reg
GO:0055013	cardiac muscle cell development	48	4	0.75	0.00649	SPEG VEGFA PDGFRB FHL2	de-reg
GO:0098815	modulation of excitatory postsynaptic po...	26	3	0.4	0.00742	CELF4 CUX2 SHANK1	de-reg
GO:0021517	ventral spinal cord development	42	4	0.65	0.00797	LMO4 VLDLR DAB1 HOXC10	de-reg
GO:0010762	regulation of fibroblast migration	27	3	0.42	0.00825	TGFB1 DMTN DDR2	de-reg
GO:0050808	synapse organization	200	10	3.11	0.00865	CBLN1 RAB3A CUX2 APP SHANK1 CACNG2 CTNNB1 LINGO2 MYO6 ETV5	de-reg
GO:0010453	regulation of cell fate commitment	28	3	0.44	0.00913	DUSP6 LMO4 CTNNB1	de-reg
GO:0021591	ventricular system development	28	3	0.44	0.00913	CDK6 UCHL5 PAX5	de-reg
GO:0048146	positive regulation of fibroblast prolif...	53	4	0.82	0.0092	TGFB1 CDK6 DDR2 S100A6	de-reg
GO:0006024	glycosaminoglycan biosynthetic process	111	7	1.73	0.00921	TGFB1 PDGFRB SLC35D2 B3GNT7 EXTL2 SDC2 GPC5	de-reg
GO:0003016	respiratory system process	29	3	0.45	0.01007	RAB3A GLS TCF15	de-reg
GO:0035115	embryonic forelimb morphogenesis	29	3	0.45	0.01007	HOXD11 ALX3 CTNNB1	de-reg
GO:0030534	adult behavior	134	7	2.08	0.01018	PPT1 APP SHANK1 DAB1 CNTNAP2 ABAT PAX5	de-reg
GO:0003151	outflow tract morphogenesis	55	4	0.86	0.01046	SEMA3C VEGFA DHRS3 CTNNB1	de-reg
GO:0097028	dendritic cell differentiation	30	3	0.47	0.01107	TGFB1 TNFSF9 LYN	de-reg
GO:0010718	positive regulation of epithelial to mes...	30	3	0.47	0.01107	TGFB1 OLFM1 CTNNB1	de-reg
GO:0071456	cellular response to hypoxia	119	6	1.85	0.0119	CHCHD2 VEGFA SLC29A1 STC2 VLDLR KCNK3	de-reg
GO:1903829	positive regulation of cellular protein ...	301	7	4.68	0.01203	PCM1 WBP11 OAZ1 TGFB1 VEGFA RDX PRKCI	de-reg
GO:0006084	acetyl-CoA metabolic process	31	3	0.48	0.01211	DLST ACLY PIPOX	de-reg
GO:0009954	proximal/distal pattern formation	32	3	0.5	0.01322	HOXD11 CTNNB1 HOXC10	de-reg
GO:0042176	regulation of protein catabolic process	409	10	6.36	0.01412	RHBDF1 USP11 OAZ1 UCHL5 ARNTL RDX PSMA5 MAD2L1 UBXN2A SUMO2	de-reg
GO:0034111	negative regulation of homotypic cell-ce...	91	3	1.42	0.01438	CCM2L TGFB1 RDX	de-reg
GO:0048145	regulation of fibroblast proliferation	78	6	1.21	0.01529	TGFB1 CDK6 DDR2 CTNNB1 C1QL4 S100A6	de-reg
GO:0050865	regulation of cell activation	395	9	6.14	0.01542	TGFB1 IGFBP2 TNFSF9 VAV3 LMO4 DMTN CTNNB1 HLA-DPB1 LYN	de-reg
GO:0070304	positive regulation of stress-activated ...	121	2	1.88	0.01562	VEGFA LYN	de-reg
GO:0009791	post-embryonic development	94	5	1.46	0.01563	BAK1 SEMA3C RAB3A VEGFA SLC18A2	de-reg
GO:0001569	patterning of blood vessels	35	3	0.54	0.01686	BAK1 VEGFA CTNNB1	de-reg
GO:0045599	negative regulation of fat cell differen...	36	3	0.56	0.01818	TGFB1 ARNTL C1QL4	de-reg
GO:0006986	response to unfolded protein	160	6	2.49	0.01931	BAK1 STC2 STT3B TMEM129 HSPA4 CREB3L2	de-reg
GO:0007595	lactation	37	3	0.58	0.01956	VEGFA SLC29A1 DDR1	de-reg
GO:0034220	ion transmembrane transport	895	22	13.92	0.01973	BAK1 COX6A1 PDGFRB KCNC1 SLC35D2 SLC38A2 KCNMB4 ATP1B1 ATP10D ATP6V1B2 SHANK1 SLC7A3 SVOP GABRB3 CACNG2 ATP5L CTNNB1 KCNK3 ORAI3 COX5A KCNQ3 S100A6	de-reg
GO:0007165	signal transduction	4670	85	72.64	0.01987	RHBDF1 BAK1 GUCA1A PTPRU RGS11 PLXNA2 GNAO1 SH3BP2 CNIH1 ITPK1 EFS TGFB1 RAB3A CDK6 UNC5B PTGES3 OAS3 VEGFA PDGFRB STC2 ARL6 UNC50 IGFBP2 FHL2 UCHL5 ADGRL2 IQSEC3 NPPB TNFSF9 RASL11B PDE11A OLFM1 NTS ARNTL VAV3 RAPGEF5 RDX ARHGAP20 DUSP6 RAB20 APP PSMA5 ATP1B1 NME7 ATP6V1B2 VLDLR PDE3B PID1 TSPAN18 DMTN RALGDS SHANK1 RACGAP1 ACOT11 DHRS3 DDR2 PRKCI MAD2L1 STK17A RASEF SLC7A3 GABRB3 CACNG2 CTNNB1 …	de-reg
GO:0007399	nervous system development	2170	61	33.76	0.02005	BAK1 MPPED2 SEMA3C PLXNA2 PCM1 BRINP1 GNAO1 CBLN1 TGFB1 RAB3A CDK6 UNC5B CUX2 VEGFA PDGFRB ARL6 UCHL5 KCNC1 OLFM1 PPT1 WASF3 ARNTL VAV3 RAPGEF5 COX17 DUSP6 SRRM4 APP LMO4 PSMA5 NME7 ECE2 VLDLR NRSN1 SHANK1 RACGAP1 PRKCI GABRB3 CTNNB1 SDC2 RFNG KCNK3 BPTF SNTG2 DAB1 CNTNAP2 LINGO2 UGT8 LY6H HOXC10 SCRIB KCNQ3 RTN4RL1 CCK PCDH18 PAX5 MYO6 S100A6 ARHGEF28 ETV5 LYN	de-reg
GO:0048863	stem cell differentiation	225	7	3.5	0.02073	SEMA3C TGFB1 CDK6 OLFM1 ECE2 CTNNB1 CHD2	de-reg
GO:0044257	cellular protein catabolic process	594	16	9.24	0.02118	RHBDF1 MAGEC2 USP11 UCHL5 UCHL3 PPT1 ARNTL RDX PSMA5 CAPN2 STT3B MAD2L1 TMEM129 UBXN2A CTSF SUMO2	de-reg
GO:0014015	positive regulation of gliogenesis	39	3	0.61	0.0225	PRKCI ETV5 LYN	de-reg
GO:0007528	neuromuscular junction development	39	3	0.61	0.0225	APP CACNG2 ETV5	de-reg
GO:0001974	blood vessel remodeling	40	3	0.62	0.02405	BAK1 SEMA3C TGFB1	de-reg
GO:0006754	ATP biosynthetic process	40	3	0.62	0.02492	TGFB1 PID1 ATP5L	de-reg
GO:0038083	peptidyl-tyrosine autophosphorylation	41	3	0.64	0.02566	VEGFA DDR1 LYN	de-reg
GO:0042542	response to hydrogen peroxide	101	4	1.57	0.0273	BAK1 GNAO1 PDGFRB ZNF580	de-reg
GO:0046928	regulation of neurotransmitter secretion	42	3	0.65	0.02732	RIMS4 RAB3A KCNMB4	de-reg
GO:0006165	nucleoside diphosphate phosphorylation	81	3	1.26	0.0281	NME7 AK5 HK1	de-reg
GO:0032355	response to estradiol	110	5	1.71	0.02862	TGFB1 PDGFRB IGFBP2 NTS CTNNB1	de-reg
GO:0016079	synaptic vesicle exocytosis	75	4	1.17	0.02938	SYT13 RIMS4 RAB3A SCRIB	de-reg
GO:0007389	pattern specification process	400	15	6.22	0.02945	BAK1 SEMA3C PLXNA2 VEGFA ARL6 RNF2 TCF15 HOXD11 DUSP6 NME7 ALX3 CTNNB1 RFNG BPTF HOXC10	de-reg
GO:1903391	regulation of adherens junction organiza...	46	3	0.72	0.03069	VEGFA RDX DMTN	de-reg
GO:0061035	regulation of cartilage development	54	3	0.84	0.03071	TGFB1 HOXD11 CTNNB1	de-reg
GO:0007492	endoderm development	71	4	1.1	0.03099	TGFB1 DUSP6 CTNNB1 BPTF	de-reg
GO:0048704	embryonic skeletal system morphogenesis	87	4	1.35	0.03253	HOXD11 ALX3 CTNNB1 PAX5	de-reg
GO:0007568	aging	239	8	3.72	0.03294	BAK1 GNAO1 AMH TGFB1 CDK6 IGFBP2 ARNTL PAX5	de-reg
GO:0032869	cellular response to insulin stimulus	367	9	5.71	0.03414	PDGFRB LPIN1 DUSP6 PSMA5 ATP6V1B2 VLDLR PDE3B PID1 PRKCI	de-reg
GO:0050921	positive regulation of chemotaxis	100	4	1.56	0.03441	TGFB1 VEGFA PDGFRB ZNF580	de-reg
GO:0009066	aspartate family amino acid metabolic pr...	46	3	0.72	0.03454	DLST NMNAT2 PIPOX	de-reg
GO:0051145	smooth muscle cell differentiation	46	3	0.72	0.03454	TGFB1 VEGFA CTNNB1	de-reg
GO:0051983	regulation of chromosome segregation	82	3	1.28	0.03462	RACGAP1 MAD2L1 CTNNB1	de-reg
GO:0060485	mesenchyme development	197	7	3.06	0.0358	SEMA3C AMH TGFB1 PDGFRB TCF15 OLFM1 CTNNB1	de-reg
GO:0009306	protein secretion	422	10	6.56	0.03599	RHBDF1 CBLN1 TGFB1 RAB3A ARNTL STXBP5L PDE3B DMTN ABAT LYN	de-reg
GO:0031334	positive regulation of protein complex a...	168	5	2.61	0.03644	TGFB1 VEGFA CTNNB1 CCK ARPIN	de-reg
GO:1901264	carbohydrate derivative transport	47	3	0.73	0.03649	SLC29A1 SLC35D2 VLDLR	de-reg
GO:0007167	enzyme linked receptor protein signaling...	1147	24	17.84	0.03658	RHBDF1 PTPRU TGFB1 VEGFA PDGFRB IGFBP2 UCHL5 NPPB VAV3 DUSP6 APP PSMA5 ATP6V1B2 PDE3B PID1 RALGDS DDR2 PRKCI CTNNB1 SDC2 PTP4A3 DDR1 ARHGEF28 LYN	de-reg
GO:0001783	B cell apoptotic process	20	2	0.31	0.03808	BAK1 LYN	de-reg
GO:0009214	cyclic nucleotide catabolic process	20	2	0.31	0.03808	PDE11A PDE3B	de-reg
GO:0019835	cytolysis	20	2	0.31	0.03808	BAK1 C7	de-reg
GO:0031063	regulation of histone deacetylation	20	2	0.31	0.03808	TGFB1 VEGFA	de-reg
GO:0050832	defense response to fungus	20	2	0.31	0.03808	TGFB1 APP	de-reg
GO:0021801	cerebral cortex radial glia guided migra...	20	2	0.31	0.03808	CTNNB1 DAB1	de-reg
GO:0033137	negative regulation of peptidyl-serine p...	20	2	0.31	0.03808	BAK1 DMTN	de-reg
GO:0002052	positive regulation of neuroblast prolif...	20	2	0.31	0.03808	VEGFA CTNNB1	de-reg
GO:0010996	response to auditory stimulus	20	2	0.31	0.03808	KCNC1 CNTNAP2	de-reg
GO:0090190	positive regulation of branching involve...	20	2	0.31	0.03808	TGFB1 VEGFA	de-reg
GO:0044802	single-organism membrane organization	822	21	12.79	0.03935	BAK1 SAR1A TGFB1 RAB3A ARL6 PPT1 VAV3 LPIN1 RDX RAB20 ATP1B1 NME7 ATP10D PID1 DMTN PRKCI TUB HSPA4 UBXN2A CNTNAP2 ETV5	de-reg
GO:0070373	negative regulation of ERK1 and ERK2 cas...	49	3	0.76	0.04054	DUSP6 C1QL4 LYN	de-reg
GO:0048678	response to axon injury	58	3	0.9	0.04152	NTS RTN4RL1 LYN	de-reg
GO:0032469	endoplasmic reticulum calcium ion homeos...	21	2	0.33	0.04167	BAK1 APP	de-reg
GO:0061384	heart trabecula morphogenesis	21	2	0.33	0.04167	CCM2L FHL2	de-reg
GO:0003309	type B pancreatic cell differentiation	21	2	0.33	0.04167	CDK6 ARNTL	de-reg
GO:0043536	positive regulation of blood vessel endo...	21	2	0.33	0.04167	TGFB1 VEGFA	de-reg
GO:0042481	regulation of odontogenesis	21	2	0.33	0.04167	TGFB1 SP6	de-reg
GO:2000573	positive regulation of DNA biosynthetic ...	21	2	0.33	0.04167	PDGFRB CTNNB1	de-reg
GO:0032967	positive regulation of collagen biosynth...	21	2	0.33	0.04167	TGFB1 PDGFRB	de-reg
GO:0001708	cell fate specification	76	4	1.18	0.04237	DUSP6 LMO4 CTNNB1 HOXC10	de-reg
GO:0051924	regulation of calcium ion transport	183	9	2.85	0.04373	BAK1 GNAO1 TGFB1 PDGFRB STC2 SARAF ATP1B1 CTNNB1 LYN	de-reg
GO:0007603	phototransduction, visible light	84	4	1.31	0.04457	GUCA1A DHRS3 SDC2 GPC5	de-reg
GO:0051881	regulation of mitochondrial membrane pot...	51	3	0.79	0.04481	BAK1 PID1 CCK	de-reg
GO:0061136	regulation of proteasomal protein catabo...	221	5	3.44	0.04513	RHBDF1 USP11 UCHL5 MAD2L1 SUMO2	de-reg
GO:0045197	establishment or maintenance of epitheli...	22	2	0.34	0.04537	TCF15 PRKCI	de-reg
GO:0071549	cellular response to dexamethasone stimu...	22	2	0.34	0.04537	TGFB1 NTS	de-reg
GO:0008105	asymmetric protein localization	22	2	0.34	0.04537	RDX SCRIB	de-reg
GO:0002507	tolerance induction	22	2	0.34	0.04537	TGFB1 LYN	de-reg
GO:0048643	positive regulation of skeletal muscle t...	22	2	0.34	0.04537	ARNTL CTNNB1	de-reg
GO:1903077	negative regulation of protein localizat...	22	2	0.34	0.04537	TGFB1 PID1	de-reg
GO:0042104	positive regulation of activated T cell ...	22	2	0.34	0.04537	IGFBP2 TNFSF9	de-reg
GO:0070665	positive regulation of leukocyte prolife...	107	5	1.66	0.04546	IGFBP2 TNFSF9 VAV3 HLA-DPB1 LYN	de-reg
GO:0006278	RNA-dependent DNA replication	23	2	0.36	0.04581	PTGES3 CTNNB1	de-reg
GO:1990089	response to nerve growth factor	27	2	0.42	0.04582	KCNC1 NTS	de-reg
GO:0031325	positive regulation of cellular metaboli...	2599	41	40.43	0.04583	BAK1 MAGEC2 GUCA1A DAZAP1 POLR2E CELF4 AMH TGFB1 CHCHD2 VEGFA PDGFRB FHL2 MORF4L2 ACLY ARNTL VAV3 LPIN1 DCUN1D5 RDX DUSP6 APP LMO4 PSMA5 VLDLR PID1 HK1 DDR2 PRKCI CTNNB1 BPTF DAB1 SCRIB CREB3L2 CCK SUMO2 PAX5 MYO6 CCNL2 ETV5 LYN MPV17L2	de-reg
GO:0001773	myeloid dendritic cell activation	23	2	0.36	0.0492	TGFB1 TNFSF9	de-reg
GO:0071242	cellular response to ammonium ion	23	2	0.36	0.0492	GABRB3 KCNQ3	de-reg
GO:0009220	pyrimidine ribonucleotide biosynthetic p...	23	2	0.36	0.0492	NME7 AK5	de-reg
GO:0051647	nucleus localization	23	2	0.36	0.0492	PCM1 WDR43	de-reg
GO:0010226	response to lithium ion	23	2	0.36	0.0492	IGFBP2 NTS	de-reg
GO:0045686	negative regulation of glial cell differ...	23	2	0.36	0.0492	CTNNB1 DAB1	de-reg
GO:0010543	regulation of platelet activation	23	2	0.36	0.0492	DMTN LYN	de-reg
GO:0040036	regulation of fibroblast growth factor r...	23	2	0.36	0.0492	DUSP6 CTNNB1	de-reg
GO:0002068	glandular epithelial cell development	23	2	0.36	0.0492	CDK6 ARNTL	de-reg
GO:0042493	response to drug	372	11	3.75	0.0014	SEMA3C GNAO1 IGFBP2 KCNC1 NTS VAV3 DUSP6 CTNNB1 KCNK3 DAB1 ABAT	down-reg
GO:0030534	adult behavior	134	6	1.35	0.0022	APP SHANK1 DAB1 CNTNAP2 ABAT PAX5	down-reg
GO:0098815	modulation of excitatory postsynaptic po...	26	3	0.26	0.0022	CELF4 CUX2 SHANK1	down-reg
GO:0050808	synapse organization	200	8	2.01	0.0026	CBLN1 RAB3A CUX2 APP SHANK1 CACNG2 CTNNB1 ETV5	down-reg
GO:0010453	regulation of cell fate commitment	28	3	0.28	0.0027	DUSP6 LMO4 CTNNB1	down-reg
GO:0003016	respiratory system process	29	3	0.29	0.003	RAB3A GLS TCF15	down-reg
GO:0009954	proximal/distal pattern formation	32	3	0.32	0.004	HOXD11 CTNNB1 HOXC10	down-reg
GO:0007420	brain development	627	15	6.31	0.005	GNAO1 CBLN1 ARL6 UCHL5 KCNC1 COX17 APP NME7 ECE2 CTNNB1 KCNK3 DAB1 CNTNAP2 PCDH18 PAX5	down-reg
GO:0007528	neuromuscular junction development	39	3	0.39	0.007	APP CACNG2 ETV5	down-reg
GO:0014047	glutamate secretion	41	3	0.41	0.0081	RAB3A GLS CCK	down-reg
GO:0046928	regulation of neurotransmitter secretion	42	3	0.42	0.0086	RIMS4 RAB3A KCNMB4	down-reg
GO:0007165	signal transduction	4670	54	47.02	0.013	GUCA1A PTPRU GNAO1 CNIH1 EFS RAB3A UNC5B PTGES3 STC2 ARL6 IGFBP2 FHL2 UCHL5 IQSEC3 TNFSF9 RASL11B PDE11A OLFM1 NTS ARNTL VAV3 RDX ARHGAP20 DUSP6 RAB20 APP PSMA5 ATP1B1 NME7 ATP6V1B2 PDE3B PID1 SHANK1 RACGAP1 DHRS3 PRKCI MAD2L1 STK17A RASEF SLC7A3 GABRB3 CACNG2 CTNNB1 GNG4 SDC2 DAB1 GPR160 AEN CREB3L2 NXPH4 PLCXD3 CCK SMOC1 HLA-DPB1	down-reg
GO:0001708	cell fate specification	76	4	0.77	0.0137	DUSP6 LMO4 CTNNB1 HOXC10	down-reg
GO:0051983	regulation of chromosome segregation	82	3	0.83	0.0153	RACGAP1 MAD2L1 CTNNB1	down-reg
GO:0045930	negative regulation of mitotic cell cycl...	228	5	2.3	0.0168	BRINP1 RPA2 PSMA5 MAD2L1 CTNNB1	down-reg
GO:0010996	response to auditory stimulus	20	2	0.2	0.017	KCNC1 CNTNAP2	down-reg
GO:0021801	cerebral cortex radial glia guided migra...	20	2	0.2	0.017	CTNNB1 DAB1	down-reg
GO:0009214	cyclic nucleotide catabolic process	20	2	0.2	0.017	PDE11A PDE3B	down-reg
GO:0003151	outflow tract morphogenesis	55	3	0.55	0.0179	SEMA3C DHRS3 CTNNB1	down-reg
GO:0061384	heart trabecula morphogenesis	21	2	0.21	0.0187	CCM2L FHL2	down-reg
GO:0050803	regulation of synapse structure or activ...	206	5	2.07	0.0198	CBLN1 RAB3A CUX2 APP ETV5	down-reg
GO:0016358	dendrite development	176	5	1.77	0.02	CUX2 APP SHANK1 SDC2 DAB1	down-reg
GO:0045197	establishment or maintenance of epitheli...	22	2	0.22	0.0204	TCF15 PRKCI	down-reg
GO:0042104	positive regulation of activated T cell ...	22	2	0.22	0.0204	IGFBP2 TNFSF9	down-reg
GO:0014009	glial cell proliferation	22	2	0.22	0.0204	PRKCI ETV5	down-reg
GO:0048643	positive regulation of skeletal muscle t...	22	2	0.22	0.0204	ARNTL CTNNB1	down-reg
GO:0022904	respiratory electron transport chain	120	4	1.21	0.0205	COX6A1 NDUFAF4 ATP5L COX5A	down-reg
GO:0010226	response to lithium ion	23	2	0.23	0.0222	IGFBP2 NTS	down-reg
GO:0040036	regulation of fibroblast growth factor r...	23	2	0.23	0.0222	DUSP6 CTNNB1	down-reg
GO:0045686	negative regulation of glial cell differ...	23	2	0.23	0.0222	CTNNB1 DAB1	down-reg
GO:0071242	cellular response to ammonium ion	23	2	0.23	0.0222	GABRB3 KCNQ3	down-reg
GO:0042755	eating behavior	24	2	0.24	0.024	TCF15 CCK	down-reg
GO:0001702	gastrulation with mouth forming second	24	2	0.24	0.024	RNF2 CTNNB1	down-reg
GO:1902803	regulation of synaptic vesicle transport	24	2	0.24	0.024	RIMS4 RAB3A	down-reg
GO:0046034	ATP metabolic process	193	6	1.94	0.0252	ATP1B1 ATP6V1B2 PID1 HK1 ATP5L COX5A	down-reg
GO:0061512	protein localization to cilium	25	2	0.25	0.026	ARL6 TUB	down-reg
GO:0060999	positive regulation of dendritic spine d...	25	2	0.25	0.026	CUX2 SHANK1	down-reg
GO:0033120	positive regulation of RNA splicing	25	2	0.25	0.026	DAZAP1 CELF4	down-reg
GO:0007268	synaptic transmission	668	18	6.73	0.0262	SYT13 RIMS4 CELF4 CBLN1 RAB3A CUX2 GLS KCNC1 KCNMB4 SHANK1 GABRB3 CACNG2 CTNNB1 GNG4 KCNK3 ABAT KCNQ3 ETV5	down-reg
GO:0098657	import into cell	26	2	0.26	0.0279	ATP1B1 SLC7A3	down-reg
GO:1901381	positive regulation of potassium ion tra...	26	2	0.26	0.0279	KCNC1 ATP1B1	down-reg
GO:0015012	heparan sulfate proteoglycan biosyntheti...	26	2	0.26	0.0279	EXTL2 CTNNB1	down-reg
GO:0006278	RNA-dependent DNA replication	23	2	0.23	0.0297	PTGES3 CTNNB1	down-reg
GO:1990089	response to nerve growth factor	27	2	0.27	0.0298	KCNC1 NTS	down-reg
GO:0006298	mismatch repair	27	2	0.27	0.03	RNASEH2A RPA2	down-reg
GO:0001893	maternal placenta development	27	2	0.27	0.03	DAZAP1 STC2	down-reg
GO:1900449	regulation of glutamate receptor signali...	27	2	0.27	0.03	SHANK1 CACNG2	down-reg
GO:0045666	positive regulation of neuron differenti...	267	6	2.69	0.0318	BRINP1 CUX2 SHANK1 PRKCI DAB1 ETV5	down-reg
GO:0007274	neuromuscular synaptic transmission	28	2	0.28	0.0321	RAB3A ETV5	down-reg
GO:0021591	ventricular system development	28	2	0.28	0.0321	UCHL5 PAX5	down-reg
GO:0000381	regulation of alternative mRNA splicing,...	28	2	0.28	0.0321	CELF4 SRRM4	down-reg
GO:0031641	regulation of myelination	29	2	0.29	0.0342	WASF3 CTNNB1	down-reg
GO:0035115	embryonic forelimb morphogenesis	29	2	0.29	0.0342	HOXD11 CTNNB1	down-reg
GO:0009154	purine ribonucleotide catabolic process	29	2	0.29	0.0342	PDE11A PDE3B	down-reg
GO:1901976	regulation of cell cycle checkpoint	29	2	0.29	0.0342	RPA2 MAD2L1	down-reg
GO:0031128	developmental induction	29	2	0.29	0.0342	HOXD11 CTNNB1	down-reg
GO:0032482	Rab protein signal transduction	71	3	0.71	0.0348	RAB3A RAB20 RASEF	down-reg
GO:0010718	positive regulation of epithelial to mes...	30	2	0.3	0.0364	OLFM1 CTNNB1	down-reg
GO:0010092	specification of organ identity	30	2	0.3	0.0364	HOXD11 CTNNB1	down-reg
GO:0071805	potassium ion transmembrane transport	158	5	1.59	0.0366	KCNC1 KCNMB4 ATP1B1 KCNK3 KCNQ3	down-reg
GO:0008038	neuron recognition	31	2	0.31	0.0387	APP CNTNAP2	down-reg
GO:0060795	cell fate commitment involved in formati...	31	2	0.31	0.0387	DUSP6 CTNNB1	down-reg
GO:0003156	regulation of organ formation	31	2	0.31	0.0387	HOXD11 CTNNB1	down-reg
GO:0014706	striated muscle tissue development	310	6	3.12	0.0391	SEMA3C CCM2L FHL2 ARNTL CTNNB1 PAX5	down-reg
GO:0071774	response to fibroblast growth factor	318	4	3.2	0.0397	KCNC1 DUSP6 PSMA5 CTNNB1	down-reg
GO:0016079	synaptic vesicle exocytosis	75	3	0.76	0.0399	SYT13 RIMS4 RAB3A	down-reg
GO:0014003	oligodendrocyte development	32	2	0.32	0.041	WASF3 KCNQ3	down-reg
GO:0006906	vesicle fusion	77	3	0.78	0.0426	RAB3A VAV3 RAB20	down-reg
GO:0021522	spinal cord motor neuron differentiation	33	2	0.33	0.0434	LMO4 HOXC10	down-reg
GO:0007399	nervous system development	2170	43	21.85	0.0448	MPPED2 SEMA3C BRINP1 GNAO1 CBLN1 RAB3A UNC5B CUX2 ARL6 UCHL5 KCNC1 OLFM1 WASF3 ARNTL VAV3 COX17 DUSP6 SRRM4 APP LMO4 PSMA5 NME7 ECE2 NRSN1 SHANK1 RACGAP1 PRKCI GABRB3 CTNNB1 SDC2 KCNK3 SNTG2 DAB1 CNTNAP2 UGT8 LY6H HOXC10 KCNQ3 RTN4RL1 CCK PCDH18 PAX5 ETV5	down-reg
GO:0019226	transmission of nerve impulse	64	3	0.64	0.0454	KCNMB4 CACNG2 CNTNAP2	down-reg
GO:0050685	positive regulation of mRNA processing	34	2	0.34	0.0458	DAZAP1 CELF4	down-reg
GO:0000398	mRNA splicing, via spliceosome	268	8	2.7	0.0459	SNRNP40 DAZAP1 WBP11 POLR2E CELF4 SNRPF SRRM4 LSM3	down-reg
GO:0032412	regulation of ion transmembrane transpor...	166	3	1.67	0.046	ATP1B1 SHANK1 CACNG2	down-reg
GO:0009790	embryo development	912	12	9.18	0.0475	SEMA3C CELF4 RNF2 TCF15 HOXD11 DUSP6 LMO4 CFC1B RACGAP1 CTNNB1 HOXC10 PAX5	down-reg
GO:0061028	establishment of endothelial barrier	35	2	0.35	0.0483	RDX CTNNB1	down-reg
GO:0006271	DNA strand elongation involved in DNA re...	35	2	0.35	0.0483	RNASEH2A RPA2	down-reg
GO:0072655	establishment of protein localization to...	173	3	1.74	0.0492	WBP11 HK1 HSPA4	down-reg
GO:0038084	vascular endothelial growth factor signa...	21	3	0.12	0.0002	VEGFA PDGFRB PTP4A3	up-reg
GO:0048146	positive regulation of fibroblast prolif...	53	4	0.29	0.0002	TGFB1 CDK6 DDR2 S100A6	up-reg
GO:0043552	positive regulation of phosphatidylinosi...	27	3	0.15	0.00042	TGFB1 PDGFRB LYN	up-reg
GO:0010762	regulation of fibroblast migration	27	3	0.15	0.00042	TGFB1 DMTN DDR2	up-reg
GO:1903053	regulation of extracellular matrix organ...	29	3	0.16	0.00052	TGFB1 DDR2 DDR1	up-reg
GO:0031100	organ regeneration	71	4	0.39	0.00062	BAK1 TGFB1 LPIN1 DDR1	up-reg
GO:0002576	platelet degranulation	80	4	0.44	0.00097	TGFB1 VEGFA DMTN LYN	up-reg
GO:0007595	lactation	37	3	0.2	0.00108	VEGFA SLC29A1 DDR1	up-reg
GO:0038083	peptidyl-tyrosine autophosphorylation	41	3	0.22	0.00146	VEGFA DDR1 LYN	up-reg
GO:0045860	positive regulation of protein kinase ac...	561	7	3.08	0.00149	BAK1 TGFB1 VEGFA PDGFRB VLDLR DDR2 CCNL2	up-reg
GO:1901264	carbohydrate derivative transport	47	3	0.26	0.00217	SLC29A1 SLC35D2 VLDLR	up-reg
GO:0055013	cardiac muscle cell development	48	3	0.26	0.0023	SPEG VEGFA PDGFRB	up-reg
GO:0044257	cellular protein catabolic process	594	7	3.26	0.00284	RHBDF1 MAGEC2 USP11 PPT1 CAPN2 TMEM129 UBXN2A	up-reg
GO:0035108	limb morphogenesis	139	3	0.76	0.0038	BAK1 PLXNA2 ALX3	up-reg
GO:0050921	positive regulation of chemotaxis	100	4	0.55	0.0046	TGFB1 VEGFA PDGFRB ZNF580	up-reg
GO:0033137	negative regulation of peptidyl-serine p...	20	2	0.11	0.0053	BAK1 DMTN	up-reg
GO:0090190	positive regulation of branching involve...	20	2	0.11	0.0053	TGFB1 VEGFA	up-reg
GO:0031063	regulation of histone deacetylation	20	2	0.11	0.0053	TGFB1 VEGFA	up-reg
GO:0001783	B cell apoptotic process	20	2	0.11	0.0053	BAK1 LYN	up-reg
GO:0070304	positive regulation of stress-activated ...	121	2	0.66	0.00546	VEGFA LYN	up-reg
GO:0042481	regulation of odontogenesis	21	2	0.12	0.00583	TGFB1 SP6	up-reg
GO:0032967	positive regulation of collagen biosynth...	21	2	0.12	0.00583	TGFB1 PDGFRB	up-reg
GO:0043536	positive regulation of blood vessel endo...	21	2	0.12	0.00583	TGFB1 VEGFA	up-reg
GO:0034220	ion transmembrane transport	895	7	4.91	0.00628	BAK1 PDGFRB SLC35D2 SLC38A2 ATP10D ORAI3 S100A6	up-reg
GO:0002507	tolerance induction	22	2	0.12	0.00639	TGFB1 LYN	up-reg
GO:0060444	branching involved in mammary gland duct...	22	2	0.12	0.00639	TGFB1 DDR1	up-reg
GO:0010543	regulation of platelet activation	23	2	0.13	0.00698	DMTN LYN	up-reg
GO:0007269	neurotransmitter secretion	148	4	0.81	0.00735	PPT1 SLC38A2 SLC18A2 SCRIB	up-reg
GO:0060561	apoptotic process involved in morphogene...	25	2	0.14	0.00822	BAK1 SCRIB	up-reg
GO:0006024	glycosaminoglycan biosynthetic process	111	5	0.61	0.01	TGFB1 PDGFRB SLC35D2 B3GNT7 GPC5	up-reg
GO:0018146	keratan sulfate biosynthetic process	28	2	0.15	0.01024	SLC35D2 B3GNT7	up-reg
GO:0001782	B cell homeostasis	28	2	0.15	0.01024	BAK1 LYN	up-reg
GO:0050803	regulation of synapse structure or activ...	206	3	1.13	0.01082	PPT1 LINGO2 MYO6	up-reg
GO:0051186	cofactor metabolic process	324	4	1.78	0.01159	PCCB PPT1 ACLY PIPOX	up-reg
GO:0097028	dendritic cell differentiation	30	2	0.16	0.0117	TGFB1 LYN	up-reg
GO:0045104	intermediate filament cytoskeleton organ...	30	2	0.16	0.0117	PRPH ARHGEF28	up-reg
GO:0006084	acetyl-CoA metabolic process	31	2	0.17	0.01247	ACLY PIPOX	up-reg
GO:0014003	oligodendrocyte development	32	2	0.18	0.01325	TGFB1 LYN	up-reg
GO:0034405	response to fluid shear stress	33	2	0.18	0.01406	TGFB1 PDGFRB	up-reg
GO:0009636	response to toxic substance	172	4	0.94	0.01476	BAK1 PDGFRB SLC18A2 LYN	up-reg
GO:0042491	auditory receptor cell differentiation	34	2	0.19	0.01488	SCRIB MYO6	up-reg
GO:0009791	post-embryonic development	94	3	0.52	0.0149	BAK1 VEGFA SLC18A2	up-reg
GO:0001569	patterning of blood vessels	35	2	0.19	0.01573	BAK1 VEGFA	up-reg
GO:0045646	regulation of erythrocyte differentiatio...	35	2	0.19	0.01573	CDK6 LYN	up-reg
GO:0042493	response to drug	372	6	2.04	0.01633	BAK1 AMH TGFB1 VLDLR MYO6 LYN	up-reg
GO:0045599	negative regulation of fat cell differen...	36	2	0.2	0.01659	TGFB1 C1QL4	up-reg
GO:0007626	locomotory behavior	179	4	0.98	0.01723	PPT1 SLC18A2 ESPN MYO6	up-reg
GO:0048863	stem cell differentiation	225	3	1.23	0.0184	TGFB1 CDK6 CHD2	up-reg
GO:0001954	positive regulation of cell-matrix adhes...	39	2	0.21	0.01931	CDK6 VEGFA	up-reg
GO:0001974	blood vessel remodeling	40	2	0.22	0.02026	BAK1 TGFB1	up-reg
GO:0014047	glutamate secretion	41	2	0.22	0.02122	SLC38A2 MYO6	up-reg
GO:0045840	positive regulation of mitotic nuclear d...	41	2	0.22	0.02122	TGFB1 PDGFRB	up-reg
GO:0034112	positive regulation of homotypic cell-ce...	171	2	0.94	0.02174	DMTN LYN	up-reg
GO:0042542	response to hydrogen peroxide	101	3	0.55	0.02185	BAK1 PDGFRB ZNF580	up-reg
GO:0048839	inner ear development	167	4	0.92	0.02248	TGFB1 PDGFRB SCRIB MYO6	up-reg
GO:0051893	regulation of focal adhesion assembly	44	2	0.24	0.02423	VEGFA DMTN	up-reg
GO:0022617	extracellular matrix disassembly	114	3	0.63	0.02474	TGFB1 DDR2 DDR1	up-reg
GO:0048008	platelet-derived growth factor receptor ...	45	2	0.25	0.02527	VEGFA PDGFRB	up-reg
GO:0031663	lipopolysaccharide-mediated signaling pa...	45	2	0.25	0.02527	TGFB1 LYN	up-reg
GO:0051145	smooth muscle cell differentiation	46	2	0.25	0.02632	TGFB1 VEGFA	up-reg
GO:0035601	protein deacylation	75	3	0.41	0.02658	TGFB1 VEGFA PPT1	up-reg
GO:0051046	regulation of secretion	590	5	3.24	0.02686	RHBDF1 TGFB1 NPPB MYO6 LYN	up-reg
GO:0060485	mesenchyme development	197	3	1.08	0.02728	AMH TGFB1 PDGFRB	up-reg
GO:0070373	negative regulation of ERK1 and ERK2 cas...	49	2	0.27	0.02959	C1QL4 LYN	up-reg
GO:0030335	positive regulation of cell migration	313	7	1.72	0.03071	TGFB1 VEGFA PDGFRB DMTN DDR2 ZNF580 LYN	up-reg
GO:0001541	ovarian follicle development	50	2	0.27	0.03072	AMH VEGFA	up-reg
GO:0070527	platelet aggregation	50	2	0.27	0.03072	DMTN LYN	up-reg
GO:0014909	smooth muscle cell migration	43	2	0.24	0.03215	PDGFRB DDR1	up-reg
GO:0006898	receptor-mediated endocytosis	228	5	1.25	0.03298	VEGFA PPT1 LOXL4 SSC4D VLDLR	up-reg
GO:0032869	cellular response to insulin stimulus	367	3	2.01	0.03359	PDGFRB LPIN1 VLDLR	up-reg
GO:0009890	negative regulation of biosynthetic proc...	1358	5	7.45	0.034	TGFB1 VEGFA VLDLR SLC18A2 BPTF	up-reg
GO:0031325	positive regulation of cellular metaboli...	2599	15	14.26	0.03507	BAK1 MAGEC2 AMH TGFB1 VEGFA PDGFRB ACLY LPIN1 VLDLR DDR2 BPTF SCRIB MYO6 CCNL2 LYN	up-reg
GO:0001952	regulation of cell-matrix adhesion	83	4	0.46	0.03656	CDK6 VEGFA DMTN DDR1	up-reg
GO:0006027	glycosaminoglycan catabolic process	55	2	0.3	0.03659	TGFB1 GPC5	up-reg
GO:0010604	positive regulation of macromolecule met...	2559	16	14.04	0.03721	BAK1 MAGEC2 AMH TGFB1 CDK6 VEGFA PDGFRB LPIN1 VLDLR DDR2 BPTF SCRIB MYO6 ZNF580 CCNL2 LYN	up-reg
GO:0007219	Notch signaling pathway	196	4	1.08	0.03723	TGFB1 CDK6 RFNG PTP4A3	up-reg
GO:0050867	positive regulation of cell activation	246	3	1.35	0.03745	TGFB1 DMTN LYN	up-reg
GO:0010517	regulation of phospholipase activity	86	2	0.47	0.03752	PDGFRB PPT1	up-reg
GO:0014070	response to organic cyclic compound	721	6	3.96	0.03758	BAK1 AMH TGFB1 PDGFRB DMTN LYN	up-reg
GO:0051279	regulation of release of sequestered cal...	57	2	0.31	0.03905	TGFB1 LYN	up-reg
GO:0002244	hematopoietic progenitor cell differenti...	137	3	0.75	0.03947	TGFB1 CDK6 CHD2	up-reg
GO:0019432	triglyceride biosynthetic process	58	2	0.32	0.04031	ACLY LPIN1	up-reg
GO:0051494	negative regulation of cytoskeleton orga...	110	3	0.6	0.04089	DMTN ESPN ARPIN	up-reg
GO:0043583	ear development	190	5	1.04	0.04144	TGFB1 PDGFRB SCRIB MYO6 DDR1	up-reg
GO:1902692	regulation of neuroblast proliferation	28	2	0.15	0.04259	TGFB1 VEGFA	up-reg
GO:0030308	negative regulation of cell growth	142	3	0.78	0.04314	TGFB1 NPPB PPT1	up-reg
GO:0001578	microtubule bundle formation	63	2	0.35	0.0468	CCSER2 TPPP3	up-reg
GO:1902743	regulation of lamellipodium organization	31	2	0.17	0.04779	DMTN ARPIN	up-reg
GO:0050672	negative regulation of lymphocyte prolif...	59	2	0.32	0.04788	TGFB1 LYN	up-reg
GO:0001938	positive regulation of endothelial cell ...	64	2	0.35	0.04814	VEGFA ZNF580	up-reg

## Sheet: GOResults_MEdarkgrey
GO.ID	Term	Annotated	Significant	Expected	weight01	Genes
GO:0043086	negative regulation of catalytic activit...	285	15	8	0.0022	TMED2 PHACTR3 GLA OAZ1 OPRM1 UCHL5 DUSP1 TERF2 SERPINE2 APP PTPRN2 BAG4 CAMK2N2 SERPINA5 GRM3
GO:0050954	sensory perception of mechanical stimulu...	53	5	1.49	0.0023	RAB3A WFS1 SERPINE2 SRRM4 GABRB3
GO:0050804	modulation of synaptic transmission	107	11	3	0.0024	SYN1 RAB3A CUX2 CSPG5 SERPINE2 PLK2 KCNB1 GRIK3 SYN3 SIPA1L1 GRM3
GO:0016485	protein processing	113	8	3.17	0.0034	SPCS1 SPCS3 CGA SERPINE2 PCSK6 ECE2 PCSK1 NOTCH4
GO:0007389	pattern specification process	149	11	4.18	0.0047	SEMA3C MFNG MID1 LHX2 ARL6 RNF2 BARX1 ABI1 PCSK6 DLX1 NOTCH4
GO:0006900	membrane budding	25	4	0.7	0.0048	SAR1A TMED2 VPS4A S100A10
GO:0021761	limbic system development	33	4	0.93	0.005	DLX1 OTP CNTNAP2 POU3F2
GO:0021536	diencephalon development	27	4	0.76	0.0063	POU4F1 OTP CNTNAP2 POU3F2
GO:0006511	ubiquitin-dependent protein catabolic pr...	192	9	5.39	0.0072	WFS1 UBE4A UCHL5 DUSP1 RLIM VPS4A PLK2 RNF217 FAF1
GO:0016079	synaptic vesicle exocytosis	29	4	0.81	0.0082	SYN1 RPH3A RAB3A RAB3C
GO:0051705	multi-organism behavior	31	4	0.87	0.0104	APP POU4F1 PEX13 CNTNAP2
GO:0042445	hormone metabolic process	71	5	1.99	0.013	CGA PCSK6 ECE2 DHRS3 PCSK1
GO:0007420	brain development	246	19	6.91	0.0143	RPH3A LHX2 ARL6 UCHL5 COX6B1 SLC6A11 SERPINE2 AMIGO2 PHLDA1 APP DLX1 ECE2 CDH22 POU4F1 PEX13 OTP CNTNAP2 POU3F2 PAX5
GO:0009791	post-embryonic development	34	4	0.95	0.0144	SEMA3C RAB3A ITPR1 GRK1
GO:0048167	regulation of synaptic plasticity	52	5	1.46	0.0147	RAB3A SERPINE2 PLK2 KCNB1 SIPA1L1
GO:0003208	cardiac ventricle morphogenesis	20	3	0.56	0.0174	SEMA3C CCM2L POU4F1
GO:0021987	cerebral cortex development	41	5	1.15	0.0195	LHX2 PEX13 CNTNAP2 POU3F2 PAX5
GO:0071805	potassium ion transmembrane transport	59	5	1.66	0.0242	SLC12A5 DPP6 KCNB1 KCNK5 KCNK12
GO:0060998	regulation of dendritic spine developmen...	23	3	0.65	0.0255	CUX2 PLK2 SIPA1L1
GO:0001568	blood vessel development	187	5	5.25	0.0266	ASB4 SEMA3C TMED2 GATAD2A NOTCH4
GO:0023061	signal release	164	12	4.6	0.0269	SYN1 RPH3A RAB3A OPRM1 SPCS1 SPCS3 SLC6A11 ITPR1 RAB3C KCNB1 PCSK1 SYN3
GO:0006518	peptide metabolic process	272	10	7.64	0.0273	MRPS34 XPNPEP1 MRPL18 SPCS1 SPCS3 CGA PCSK6 APP ECE2 PCSK1
GO:0050865	regulation of cell activation	154	4	4.32	0.0283	TNFSF9 TEC SERPINE2 SOX13
GO:0021675	nerve development	24	3	0.67	0.0285	SERPINE2 POU4F1 GABRB3
GO:0006959	humoral immune response	43	4	1.21	0.0316	APP SPNS2 PAX5 CFHR1
GO:0007156	homophilic cell adhesion via plasma memb...	43	4	1.21	0.0316	PCDH17 AMIGO2 CDH22 PCDHA2
GO:0030534	adult behavior	58	4	1.63	0.0317	OPRM1 APP CNTNAP2 PAX5
GO:0007193	adenylate cyclase-inhibiting G-protein c...	25	3	0.7	0.0318	OPRM1 GRIK3 GRM3
GO:0048278	vesicle docking	25	3	0.7	0.0318	RAB3A RAB3C KCNB1
GO:0072659	protein localization to plasma membrane	87	7	2.44	0.0339	TMED2 ARL6 DPP6 VPS4A BAG4 KCNB1 S100A10
GO:0002230	positive regulation of defense response ...	44	4	1.24	0.034	NTHL1 CSPG5 PEX13 CLDN7
GO:0008593	regulation of Notch signaling pathway	26	3	0.73	0.0352	MFNG DLX1 NOTCH4
GO:0045921	positive regulation of exocytosis	26	3	0.73	0.0352	RAB3A VPS4A KCNB1
GO:0045761	regulation of adenylate cyclase activity	26	3	0.73	0.0352	WFS1 OPRM1 GRM3
GO:0035249	synaptic transmission, glutamatergic	27	3	0.76	0.0388	SERPINE2 GRIK3 GRM3
GO:0071310	cellular response to organic substance	776	16	21.78	0.0401	BRINP1 STRADB MID1 WFS1 CUX2 RASAL1 OPRM1 UCHL5 DUSP1 PCSK6 ITPR1 BAG4 KCNB1 ARHGEF3 GABRB3 POU3F2
GO:0007601	visual perception	68	5	1.91	0.0414	WFS1 ARL6 RABGGTB DHRS3 GRK1
GO:1902532	negative regulation of intracellular sig...	162	7	4.55	0.0421	WFS1 RASAL1 OPRM1 DUSP1 SERPINE2 ITPR1 FAF1
GO:0052652	cyclic purine nucleotide metabolic proce...	54	5	1.52	0.0421	GUCY1B3 WFS1 OPRM1 GUCY1A2 GRM3
GO:1902476	chloride transmembrane transport	28	3	0.79	0.0426	GABRA3 SLC12A5 GABRB3
GO:1903650	negative regulation of cytoplasmic trans...	38	3	1.07	0.0428	SAR1A BAG4 FAF1
GO:0050796	regulation of insulin secretion	69	5	1.94	0.0436	SPCS1 SPCS3 ITPR1 KCNB1 PCSK1
GO:0007399	nervous system development	834	37	23.41	0.0444	SEMA3C BRINP1 RPH3A SALL4 RAB3A LHX2 CUX2 RASAL1 OPRM1 ARL6 CSPG5 UCHL5 COX6B1 SLC6A11 SERPINE2 AMIGO2 PHLDA1 SRRM4 SH3GL3 APP DLX1 ECE2 PLK2 PRPS1 CDH22 POU4F1 PEX13 GABRB3 GATAD2A OTP CNTNAP2 POU3F2 RTN4RL1 GRK1 PAX5 SIPA1L1 PCDHA2
GO:0051346	negative regulation of hydrolase activit...	127	8	3.57	0.0449	TMED2 UCHL5 TERF2 SERPINE2 APP PTPRN2 BAG4 SERPINA5
GO:0001843	neural tube closure	29	3	0.81	0.0465	SALL4 LHX2 GATAD2A
GO:0019226	transmission of nerve impulse	29	3	0.81	0.0465	DPP6 CACNG2 CNTNAP2
GO:0042391	regulation of membrane potential	119	9	3.34	0.0479	GABRA3 CUX2 DPP6 KCNB1 GRIK3 KCNK5 GABRB3 CACNG2 KCNK12
GO:0017157	regulation of exocytosis	56	6	1.57	0.0489	SYN1 RPH3A RAB3A VPS4A RAB3C KCNB1
GO:0033365	protein localization to organelle	311	10	8.73	0.049	MID1 ARL6 SPCS1 CRIPT SPCS3 TERF2 BAG4 PEX13 FAF1 HSPA1L
